# Supplementary material for: Genomic Characterization of a Novel SARS-CoV-2 Lineage from Rio de Janeiro, Brazil
Source: PubMed Central journal article supplement (PMC8139668; doi:10.1128/jvi.00119-21), 2021-04-26
Supplement: JVI.00119-21-s0001.pdf [file JVI.00119-21-s0001.pdf]

## Supplemental Material

### Genomic characterization of a novel SARS-CoV-2 lineage from Rio de Janeiro, Brazil

Carolina M Voloch<sup>a</sup>, Ronaldo da Silva F Jr<sup>b</sup>, Luiz G P de Almeida<sup>b</sup>, Cynthia C Cardoso<sup>a</sup>, Otavio J. Brustolini<sup>b</sup>, Alexandra L Gerber<sup>b</sup>, Ana Paula de C Guimarães<sup>b</sup>, Diana Mariani<sup>a</sup>, Raissa Mirella da Costa<sup>a</sup>, Orlando C. Ferreira Jr<sup>a</sup>, Covid19-UFRJ Workgroup, LNCC Workgroup, Adriana Cony Cavalcanti<sup>c</sup>, Thiago Silva Frauches<sup>d</sup>, Claudia Maria Braga de Mello<sup>e</sup>, Isabela de Carvalho Leitão<sup>g</sup>, Rafael Mello Galliez<sup>f</sup>, Débora Souza Faffe<sup>g</sup>, Terezinha M P P Castiñeiras<sup>f</sup>, Amilcar Tanuri<sup>a#</sup>, Ana Tereza R de Vasconcelos<sup>b#</sup>

Carolina M Voloch and Ronaldo da Silva F Jr contributed equally to this work. Author order was determined on the basis of seniority.

Supplemental Material Contents:

**SM 1:** Sample information, quality control and sequencing metrics, and accession numbers in NCBI/SRA and GISAID.

**SM 2:** GISAID acknowledgement table.

**SM 1: Sample information, quality control and sequencing metrics, and accession numbers in NCBI/SRA and GISAID.**

| Sample | BioSamples<br>(BioProject ID:<br>PRJNA686081) | Accession ID   | Epi.<br>Week | Gender  | Age     | Bases<br>mapped<br>(cov > 1) | %<br>coverage | mean<br>coverage | #SNVs |
|--------|-----------------------------------------------|----------------|--------------|---------|---------|------------------------------|---------------|------------------|-------|
| 1      | SAMN17104460                                  | EPI_ISL_717832 | 23           | M       | 51-55   | 29892                        | 99,96         | 6099x            | 14    |
| 2      | SAMN17104461                                  | EPI_ISL_717833 | 23           | M       | 41-45   | 29863                        | 99,87         | 4877x            | 12    |
| 3      | SAMN17104462                                  | EPI_ISL_717834 | 23           | F       | 31-35   | 29834                        | 99,77         | 3190x            | 10    |
| 4      | SAMN17104463                                  | EPI_ISL_717835 | 23           | M       | 31-35   | 29656                        | 99,17         | 3925x            | 16    |
| 5      | SAMN17104464                                  | EPI_ISL_717836 | 23           | F       | 26-30   | 29863                        | 99,87         | 3672x            | 11    |
| 6      | SAMN17104465                                  | EPI_ISL_717837 | 15           | unknown | unknown | 29805                        | 99,67         | 5584x            | 13    |
| 7      | SAMN17104466                                  | EPI_ISL_717838 | 15           | unknown | unknown | 29842                        | 99,80         | 3572x            | 9     |
| 8      | SAMN17104467                                  | EPI_ISL_717839 | 15           | unknown | unknown | 29884                        | 99,94         | 4214x            | 12    |
| 9      | SAMN17104468                                  | EPI_ISL_717840 | 16           | unknown | unknown | 29873                        | 99,90         | 6455x            | 12    |
| 10     | SAMN17104431                                  | EPI_ISL_717810 | 16           | unknown | unknown | 29901                        | 99,99         | 5334x            | 10    |
| 11     | SAMN17104469                                  | EPI_ISL_717841 | 31           | F       | 31-35   | 29866                        | 99,88         | 2033x            | 15    |
| 12     | SAMN17104597                                  | EPI_ISL_717958 | 31           | M       | 36-40   | 29862                        | 99,86         | 1598x            | 21    |
| 13     | SAMN17104470                                  | EPI_ISL_717842 | 16           | unknown | unknown | 29770                        | 99,56         | 3417x            | 13    |
| 14     | SAMN17104432                                  | EPI_ISL_717811 | 16           | unknown | unknown | 29837                        | 99,78         | 3358x            | 13    |
| 15     | SAMN17104471                                  | EPI_ISL_717843 | 17           | unknown | unknown | 29812                        | 99,70         | 3892x            | 12    |
| 16     | SAMN17104472                                  | EPI_ISL_717844 | 17           | unknown | unknown | 29866                        | 99,88         | 4386x            | 15    |
| 17     | SAMN17104473                                  | EPI_ISL_717845 | 23           | F       | 41-45   | 29895                        | 99,97         | 3122x            | 11    |
| 18     | SAMN17104474                                  | EPI_ISL_717846 | 23           | F       | 21-25   | 29873                        | 99,90         | 1512x            | 12    |
| 19     | SAMN17104433                                  | EPI_ISL_717812 | 23           | M       | 16-20   | 29895                        | 99,97         | 6015x            | 10    |
| 20     | SAMN17104475                                  | EPI_ISL_717847 | 23           | M       | 36-40   | 29862                        | 99,86         | 3404x            | 11    |
| 21     | SAMN17104476                                  | EPI_ISL_717848 | 23           | M       | 51-55   | 29857                        | 99,85         | 186x             | 11    |
| 22     | SAMN17104477                                  | EPI_ISL_717849 | 23           | F       | 51-55   | 29842                        | 99,80         | 238x             | 12    |
| 23     | SAMN17104478                                  | EPI_ISL_717850 | 23           | F       | 41-45   | 29818                        | 99,72         | 809x             | 11    |
| 24     | SAMN17104434                                  | EPI_ISL_717813 | 23           | F       | 31-35   | 29850                        | 99,82         | 2750x            | 11    |
| 25     | SAMN17104479                                  | EPI_ISL_717851 | 23           | M       | unknown | 29900                        | 99,99         | 3284x            | 13    |
| 26     | SAMN17104480                                  | EPI_ISL_717852 | 23           | M       | 41-45   | 29855                        | 99,84         | 2472x            | 11    |
| 27     | SAMN17104481                                  | EPI_ISL_717853 | 27           | M       | 31-35   | 29903                        | 100,00        | 4489x            | 16    |
| 28     | SAMN17104482                                  | EPI_ISL_717854 | 27           | M       | 31-35   | 29880                        | 99,92         | 4846x            | 16    |
| 29     | SAMN17104483                                  | EPI_ISL_717855 | 27           | M       | unknown | 29886                        | 99,94         | 771x             | 14    |
| 30     | SAMN17104484                                  | EPI_ISL_717856 | 27           | F       | 26-30   | 29874                        | 99,90         | 606x             | 14    |
| 31     | SAMN17104485                                  | EPI_ISL_717857 | 27           | M       | 41-45   | 29795                        | 99,64         | 227x             | 15    |
| 32     | SAMN17104486                                  | EPI_ISL_717858 | 27           | F       | unknown | 29812                        | 99,70         | 223x             | 13    |
| 33     | SAMN17104487                                  | EPI_ISL_717859 | 27           | M       | unknown | 29816                        | 99,71         | 3744x            | 15    |
| 34     | SAMN17104488                                  | EPI_ISL_717860 | 28           | M       | unknown | 29869                        | 99,89         | 3541x            | 15    |

|    |              |                |    |   |         |       |        |        |    |
|----|--------------|----------------|----|---|---------|-------|--------|--------|----|
| 35 | SAMN17104489 | EPI_ISL_717861 | 28 | F | 56-60   | 29851 | 99,83  | 1396x  | 14 |
| 36 | SAMN17104490 | EPI_ISL_717862 | 28 | F | 61-65   | 29881 | 99,93  | 2960x  | 11 |
| 37 | SAMN17104491 | EPI_ISL_717863 | 32 | F | 31-35   | 29886 | 99,94  | 795x   | 17 |
| 38 | SAMN17104598 | EPI_ISL_717959 | 32 | F | 26-30   | 29822 | 99,73  | 2318x  | 20 |
| 39 | SAMN17104492 | EPI_ISL_717864 | 32 | F | 26-30   | 29775 | 99,57  | 623x   | 12 |
| 40 | SAMN17104493 | EPI_ISL_717865 | 32 | M | unknown | 29851 | 99,83  | 3482x  | 15 |
| 41 | SAMN17104494 | EPI_ISL_717866 | 32 | M | unknown | 29818 | 99,72  | 2906x  | 15 |
| 42 | SAMN17104495 | EPI_ISL_717867 | 32 | F | unknown | 29860 | 99,86  | 375x   | 12 |
| 43 | SAMN17104496 | EPI_ISL_717868 | 32 | F | 56-60   | 29900 | 99,99  | 3969x  | 12 |
| 44 | SAMN17104435 | EPI_ISL_717814 | 36 | F | 36-40   | 29883 | 99,93  | 2581x  | 12 |
| 45 | SAMN17104436 | EPI_ISL_717815 | 36 | F | 21-25   | 29813 | 99,70  | 196x   | 14 |
| 46 | SAMN17104425 | EPI_ISL_717806 | 36 | F | 26-30   | 29813 | 99,70  | 196x   | 13 |
| 47 | SAMN17104437 | EPI_ISL_717816 | 36 | M | 36-40   | 29877 | 99,91  | 4189x  | 15 |
| 48 | SAMN17104497 | EPI_ISL_717869 | 36 | F | 31-35   | 29834 | 99,77  | 329x   | 18 |
| 49 | SAMN17104498 | EPI_ISL_717870 | 36 | F | 21-25   | 29894 | 99,97  | 6527x  | 16 |
| 50 | SAMN17104499 | EPI_ISL_717871 | 36 | F | 56-60   | 29885 | 99,94  | 8077x  | 17 |
| 51 | SAMN17104438 | EPI_ISL_717817 | 36 | F | 46-50   | 29903 | 100,00 | 4975x  | 15 |
| 52 | SAMN17104500 | EPI_ISL_717872 | 36 | F | 31-35   | 29900 | 99,99  | 4182x  | 17 |
| 53 | SAMN17104501 | EPI_ISL_717873 | 37 | F | 21-25   | 29856 | 99,84  | 1659x  | 14 |
| 54 | SAMN17104439 | EPI_ISL_717818 | 41 | F | 56-60   | 29821 | 99,73  | 280x   | 17 |
| 55 | SAMN17104564 | EPI_ISL_717925 | 41 | F | 26-30   | 29664 | 99,20  | 146x   | 20 |
| 56 | SAMN17104502 | EPI_ISL_717874 | 41 | F | 26-30   | 29892 | 99,96  | 3406x  | 20 |
| 57 | SAMN17104503 | EPI_ISL_717875 | 41 | M | 41-45   | 29859 | 99,85  | 2032x  | 21 |
| 58 | SAMN17104504 | EPI_ISL_717793 | 41 | M | 46-50   | 29462 | 98,53  | 483x   | 17 |
| 59 | SAMN17104599 | EPI_ISL_717960 | 41 | M | 31-35   | 29894 | 99,97  | 2134x  | 19 |
| 60 | SAMN17104505 | EPI_ISL_717876 | 41 | F | 31-35   | 29892 | 99,96  | 2218x  | 16 |
| 61 | SAMN17104440 | EPI_ISL_717819 | 41 | F | 26-30   | 29880 | 99,92  | 3147x  | 14 |
| 62 | SAMN17104506 | EPI_ISL_717877 | 44 | M | 36-40   | 29899 | 99,99  | 5256x  | 22 |
| 63 | SAMN17104565 | EPI_ISL_717926 | 44 | M | 36-40   | 29857 | 99,85  | 3084x  | 22 |
| 64 | SAMN17104507 | EPI_ISL_717878 | 44 | F | 71-75   | 29900 | 99,99  | 5739x  | 20 |
| 65 | SAMN17104441 | EPI_ISL_717820 | 44 | F | 61-65   | 29814 | 99,70  | 232x   | 18 |
| 66 | SAMN17104442 | EPI_ISL_717821 | 44 | M | 41-45   | 29903 | 100,00 | 5119x  | 14 |
| 67 | SAMN17104508 | EPI_ISL_717879 | 44 | M | 26-30   | 29862 | 99,86  | 5291x  | 22 |
| 68 | SAMN17104509 | EPI_ISL_717880 | 44 | F | 26-30   | 29899 | 99,99  | 7305x  | 15 |
| 69 | SAMN17104510 | EPI_ISL_717881 | 44 | M | 61-65   | 29903 | 100,00 | 12881x | 15 |
| 70 | SAMN17104511 | EPI_ISL_717882 | 44 | F | 21-25   | 29870 | 99,89  | 6051x  | 17 |
| 71 | SAMN17104443 | EPI_ISL_717822 | 44 | M | 56-60   | 29895 | 99,97  | 2874x  | 18 |
| 72 | SAMN17104559 | EPI_ISL_717921 | 44 | M | 31-35   | 29769 | 99,55  | 547x   | 20 |
| 73 | SAMN17104566 | EPI_ISL_717927 | 44 | M | 86-90   | 29842 | 99,80  | 457x   | 19 |
| 74 | SAMN17104567 | EPI_ISL_717928 | 44 | M | 41-45   | 29899 | 99,99  | 7187x  | 21 |
| 75 | SAMN17104568 | EPI_ISL_717929 | 44 | M | 41-45   | 29874 | 99,90  | 7047x  | 23 |
| 76 | SAMN17104512 | EPI_ISL_717883 | 44 | F | 26-30   | 29656 | 99,17  | 6299x  | 15 |
| 77 | SAMN17104513 | EPI_ISL_717884 | 44 | M | 41-45   | 29788 | 99,62  | 3977x  | 15 |
| 78 | SAMN17104569 | EPI_ISL_717930 | 44 | F | 41-45   | 29838 | 99,78  | 481x   | 26 |
| 79 | SAMN17104514 | EPI_ISL_717885 | 44 | F | 66-70   | 29856 | 99,84  | 6884x  | 17 |

|     |              |                |    |   |         |       |        |       |    |
|-----|--------------|----------------|----|---|---------|-------|--------|-------|----|
| 80  | SAMN17104515 | EPI_ISL_717886 | 44 | M | 56-60   | 29867 | 99,88  | 5776x | 17 |
| 81  | SAMN17104570 | EPI_ISL_717931 | 44 | F | 31-35   | 29895 | 99,97  | 3178x | 21 |
| 82  | SAMN17104444 | EPI_ISL_717823 | 44 | F | 46-50   | 29855 | 99,84  | 1845x | 23 |
| 83  | SAMN17104571 | EPI_ISL_717932 | 44 | M | 21-25   | 29849 | 99,82  | 4245x | 19 |
| 84  | SAMN17104572 | EPI_ISL_717933 | 44 | F | 56-60   | 29874 | 99,90  | 3147x | 19 |
| 85  | SAMN17104573 | EPI_ISL_717934 | 44 | F | 36-40   | 29874 | 99,90  | 5465x | 19 |
| 86  | SAMN17104574 | EPI_ISL_717935 | 44 | F | 36-40   | 29899 | 99,99  | 4732x | 22 |
| 87  | SAMN17104558 | EPI_ISL_717920 | 44 | M | 21-25   | 29849 | 99,82  | 6343x | 18 |
| 88  | SAMN17104575 | EPI_ISL_717936 | 44 | M | 21-25   | 29894 | 99,97  | 3014x | 18 |
| 89  | SAMN17104563 | EPI_ISL_717924 | 44 | M | 51-55   | 29896 | 99,98  | 3356x | 28 |
| 90  | SAMN17104576 | EPI_ISL_717937 | 44 | M | 31-35   | 29866 | 99,88  | 6804x | 24 |
| 91  | SAMN17104577 | EPI_ISL_717938 | 44 | M | 26-30   | 29888 | 99,95  | 7552x | 20 |
| 92  | SAMN17104445 | EPI_ISL_717824 | 44 | F | 26-30   | 29857 | 99,85  | 208x  | 18 |
| 93  | SAMN17104516 | EPI_ISL_717887 | 44 | F | 56-60   | 29901 | 99,99  | 3840x | 18 |
| 94  | SAMN17104517 | EPI_ISL_717888 | 44 | M | 46-50   | 29871 | 99,89  | 2033x | 15 |
| 95  | SAMN17104560 | EPI_ISL_717922 | 44 | M | 21-25   | 29862 | 99,86  | 2977x | 23 |
| 96  | SAMN17104578 | EPI_ISL_717939 | 44 | M | 76-80   | 29860 | 99,86  | 5938x | 24 |
| 97  | SAMN17104579 | EPI_ISL_717940 | 44 | M | 66-70   | 29832 | 99,76  | 2186x | 19 |
| 98  | SAMN17104580 | EPI_ISL_717941 | 44 | F | 61-65   | 29876 | 99,91  | 3926x | 19 |
| 99  | SAMN17104455 | EPI_ISL_717831 | 44 | M | 21-25   | 29903 | 100,00 | 3992x | 20 |
| 100 | SAMN17104518 | EPI_ISL_717889 | 44 | M | 26-30   | 29869 | 99,89  | 8590x | 16 |
| 101 | SAMN17104581 | EPI_ISL_717942 | 45 | F | 16-20   | 29653 | 99,16  | 7212x | 21 |
| 102 | SAMN17104519 | EPI_ISL_717890 | 45 | F | 31-35   | 29784 | 99,60  | 3350x | 17 |
| 103 | SAMN17104520 | EPI_ISL_717891 | 45 | F | 31-35   | 29903 | 100,00 | 4556x | 19 |
| 104 | SAMN17104582 | EPI_ISL_717943 | 45 | M | 41-45   | 29870 | 99,89  | 5648x | 21 |
| 105 | SAMN17104446 | EPI_ISL_717825 | 45 | F | 56-60   | 29854 | 99,84  | 5652x | 18 |
| 106 | SAMN17104447 | EPI_ISL_717826 | 45 | M | 26-30   | 29849 | 99,82  | 1777x | 18 |
| 107 | SAMN17104583 | EPI_ISL_717944 | 45 | M | unknown | 29864 | 99,87  | 4607x | 25 |
| 108 | SAMN17104584 | EPI_ISL_717945 | 45 | F | unknown | 29866 | 99,88  | 4022x | 26 |
| 109 | SAMN17104585 | EPI_ISL_717946 | 45 | F | unknown | 29862 | 99,86  | 4538x | 26 |
| 110 | SAMN17104586 | EPI_ISL_717947 | 45 | M | 21-25   | 29785 | 99,61  | 2759x | 21 |
| 111 | SAMN17104448 | EPI_ISL_717827 | 45 | F | 26-30   | 29862 | 99,86  | 6470x | 20 |
| 112 | SAMN17104587 | EPI_ISL_717948 | 45 | M | 36-40   | 29903 | 100,00 | 4804x | 22 |
| 113 | SAMN17104588 | EPI_ISL_717949 | 45 | M | 41-45   | 29893 | 99,97  | 3988x | 21 |
| 114 | SAMN17104521 | EPI_ISL_717892 | 45 | F | 26-30   | 29900 | 99,99  | 3883x | 23 |
| 115 | SAMN17104589 | EPI_ISL_717950 | 45 | F | unknown | 29772 | 99,56  | 2613x | 20 |
| 116 | SAMN17104428 | EPI_ISL_717808 | 45 | F | unknown | 29901 | 99,99  | 3105x | 16 |
| 117 | SAMN17104522 | EPI_ISL_717893 | 45 | F | 41-45   | 29844 | 99,80  | 4223x | 17 |
| 118 | SAMN17104449 | EPI_ISL_717828 | 45 | M | 26-30   | 29888 | 99,95  | 3975x | 20 |
| 119 | SAMN17104523 | EPI_ISL_717894 | 45 | F | 36-40   | 29870 | 99,89  | 3662x | 14 |
| 120 | SAMN17104524 | EPI_ISL_717895 | 45 | M | 26-30   | 29877 | 99,91  | 2851x | 23 |
| 121 | SAMN17104590 | EPI_ISL_717951 | 45 | M | 26-30   | 29837 | 99,78  | 1222x | 19 |
| 122 | SAMN17104591 | EPI_ISL_717952 | 45 | M | 31-35   | 29622 | 99,06  | 3781x | 18 |
| 123 | SAMN17104592 | EPI_ISL_717953 | 45 | F | 16-20   | 29843 | 99,80  | 5386x | 21 |
| 124 | SAMN17104593 | EPI_ISL_717954 | 45 | F | 41-45   | 29863 | 99,87  | 3191x | 22 |
| 125 | SAMN17104424 | EPI_ISL_717802 | 45 | F | 51-55   | 25468 | 85,17  | 815x  | 6  |

|     |              |                |    |   |         |       |        |        |    |
|-----|--------------|----------------|----|---|---------|-------|--------|--------|----|
| 126 | SAMN17104456 | EPI_ISL_717791 | 45 | M | 21-25   | 29404 | 98,33  | 1346x  | 19 |
| 127 | SAMN17104561 | EPI_ISL_717805 | 45 | F | 36-40   | 26511 | 88,66  | 1658x  | 13 |
| 128 | SAMN17104426 | EPI_ISL_717801 | 45 | M | 26-30   | 25386 | 84,89  | 430x   | 5  |
| 129 | SAMN17104525 | EPI_ISL_717896 | 45 | M | 21-25   | 29900 | 99,99  | 1763x  | 17 |
| 130 | SAMN17104450 | EPI_ISL_717829 | 45 | M | unknown | 29770 | 99,56  | 6303x  | 20 |
| 131 | SAMN17104526 | EPI_ISL_717897 | 45 | M | 46-50   | 29862 | 99,86  | 5604x  | 24 |
| 132 | SAMN17104562 | EPI_ISL_717923 | 45 | M | 26-30   | 29633 | 99,10  | 7617x  | 21 |
| 133 | SAMN17104527 | EPI_ISL_717898 | 45 | F | 21-25   | 29802 | 99,66  | 5656x  | 12 |
| 134 | SAMN17104427 | EPI_ISL_717807 | 45 | F | 41-45   | 29897 | 99,98  | 3314x  | 24 |
| 135 | SAMN17104594 | EPI_ISL_717955 | 45 | F | 26-30   | 29869 | 99,89  | 5781x  | 24 |
| 136 | SAMN17104595 | EPI_ISL_717956 | 45 | M | 41-45   | 29832 | 99,76  | 7224x  | 21 |
| 137 | SAMN17104596 | EPI_ISL_717957 | 45 | F | 26-30   | 29903 | 100,00 | 4684x  | 20 |
| 138 | SAMN17104451 | EPI_ISL_717830 | 45 | F | 56-60   | 29902 | 100,00 | 5144x  | 15 |
| 139 | SAMN17104600 | EPI_ISL_717961 | 45 | M | 56-60   | 29788 | 99,62  | 5547x  | 19 |
| 140 | SAMN17104528 | EPI_ISL_717899 | 31 | M | 36-40   | 29879 | 99,92  | 3934x  | 13 |
| 141 | SAMN17104529 | EPI_ISL_717796 | 31 | F | 36-40   | 27479 | 91,89  | 280x   | 15 |
| 142 | SAMN17104530 | EPI_ISL_717900 | 31 | F | 46-50   | 29740 | 99,45  | 3813x  | 16 |
| 143 | SAMN17104531 | EPI_ISL_717901 | 31 | M | 61-65   | 29892 | 99,96  | 4239x  | 17 |
| 144 | SAMN17104532 | EPI_ISL_717797 | 27 | M | 61-65   | 27695 | 92,62  | 764x   | 9  |
| 145 | SAMN17104452 | EPI_ISL_717787 | 27 | F | 41-45   | 29144 | 97,46  | 356x   | 11 |
| 146 | SAMN17104533 | EPI_ISL_717788 | 31 | F | 46-50   | 29358 | 98,18  | 5426x  | 16 |
| 147 | SAMN17104534 | EPI_ISL_717902 | 31 | F | 26-30   | 29660 | 99,19  | 4044x  | 15 |
| 148 | SAMN17104557 | EPI_ISL_717785 | 31 | M | 46-50   | 28779 | 96,24  | 1608x  | 13 |
| 149 | SAMN17104453 | EPI_ISL_717794 | 31 | F | 36-40   | 29565 | 98,87  | 3294x  | 13 |
| 150 | SAMN17104458 | EPI_ISL_717800 | 31 | M | 56-60   | 24311 | 81,30  | 240x   | 10 |
| 151 | SAMN17104535 | EPI_ISL_717903 | 31 | M | 61-65   | 29701 | 99,32  | 3928x  | 15 |
| 152 | SAMN17104601 | EPI_ISL_717962 | 31 | F | 36-40   | 29593 | 98,96  | 248x   | 21 |
| 153 | SAMN17104536 | EPI_ISL_717790 | 31 | F | 46-50   | 29388 | 98,28  | 3120x  | 18 |
| 154 | SAMN17104537 | EPI_ISL_717803 | 31 | F | 66-70   | 25564 | 85,49  | 2034x  | 14 |
| 155 | SAMN17104459 | EPI_ISL_717795 | 31 | M | 31-35   | 26919 | 90,02  | 2283x  | 14 |
| 156 | SAMN17104457 | EPI_ISL_717799 | 31 | F | 46-50   | 28158 | 94,16  | 1916x  | 15 |
| 157 | SAMN17104538 | EPI_ISL_717904 | 31 | F | 56-60   | 29630 | 99,09  | 3742x  | 15 |
| 158 | SAMN17104539 | EPI_ISL_717905 | 31 | F | 41-45   | 29825 | 99,74  | 310x   | 17 |
| 159 | SAMN17104540 | EPI_ISL_717906 | 31 | M | 51-55   | 29631 | 99,09  | 4430x  | 13 |
| 160 | SAMN17104541 | EPI_ISL_717907 | 29 | F | 36-40   | 29604 | 99,00  | 1877x  | 16 |
| 161 | SAMN17104542 | EPI_ISL_717804 | 31 | M | 51-55   | 25693 | 85,92  | 3907x  | 12 |
| 162 | SAMN17104543 | EPI_ISL_717908 | 31 | M | 71-75   | 29822 | 99,73  | 5234x  | 17 |
| 163 | SAMN17104544 | EPI_ISL_717789 | 31 | M | 36-40   | 29366 | 98,20  | 3368x  | 13 |
| 164 | SAMN17104454 | EPI_ISL_717798 | 31 | M | 21-25   | 28015 | 93,69  | 3239x  | 16 |
| 165 | SAMN17104429 | EPI_ISL_717786 | 31 | M | 31-35   | 28889 | 96,61  | 3208x  | 13 |
| 166 | SAMN17104545 | EPI_ISL_717909 | 31 | F | 26-30   | 29648 | 99,15  | 2529x  | 13 |
| 167 | SAMN17104546 | EPI_ISL_717792 | 31 | F | 51-55   | 29492 | 98,63  | 3165x  | 20 |
| 168 | SAMN17104547 | EPI_ISL_717910 | 23 | F | 41-45   | 29862 | 99,86  | 1263x  | 10 |
| 169 | SAMN17104548 | EPI_ISL_717911 | 23 | F | 71-75   | 29897 | 99,98  | 12983x | 13 |
| 170 | SAMN17104549 | EPI_ISL_717912 | 23 | F | 36-40   | 29896 | 99,98  | 2013x  | 10 |
| 171 | SAMN17104602 | EPI_ISL_717963 | 31 | F | 41-45   | 29869 | 99,89  | 1692x  | 16 |

|     |              |                |    |   |       |       |        |       |    |
|-----|--------------|----------------|----|---|-------|-------|--------|-------|----|
| 172 | SAMN17104550 | EPI_ISL_717913 | 31 | M | 41-45 | 29864 | 99,87  | 6363x | 17 |
| 173 | SAMN17104551 | EPI_ISL_717914 | 31 | M | 21-25 | 29771 | 99,56  | 2305x | 19 |
| 174 | SAMN17104552 | EPI_ISL_717915 | 31 | M | 61-65 | 29871 | 99,89  | 2324x | 16 |
| 175 | SAMN17104553 | EPI_ISL_717916 | 31 | F | 31-35 | 29772 | 99,56  | 1181x | 16 |
| 176 | SAMN17104554 | EPI_ISL_717917 | 31 | M | 31-35 | 29903 | 100,00 | 5237x | 17 |
| 177 | SAMN17104603 | EPI_ISL_717964 | 31 | F | 21-25 | 29901 | 99,99  | 6206x | 20 |
| 178 | SAMN17104555 | EPI_ISL_717918 | 23 | F | 66-70 | 29900 | 99,99  | 2828x | 12 |
| 179 | SAMN17104556 | EPI_ISL_717919 | 23 | M | 46-50 | 29867 | 99,88  | 5608x | 14 |
| 180 | SAMN17104430 | EPI_ISL_717809 | 40 | F | 36-40 | 29895 | 99,97  | 4053x | 21 |

## SM 2: GISAIID acknowledgement table.

We gratefully acknowledge the following Authors from the Originating laboratories responsible for obtaining the specimens, as well as the Submitting laboratories where the genome data were generated and shared via GISAIID, on which this research is based.

All Submitters of data may be contacted directly via [www.gisaid.org](http://www.gisaid.org)

| Accession ID                                                   | Originating Laboratory                                                                                                                                                                          | Submitting Laboratory                                                                                                              | Authors                                                                                                                                                                                                                                                                                                                                                                                                                                                          |
|----------------------------------------------------------------|-------------------------------------------------------------------------------------------------------------------------------------------------------------------------------------------------|------------------------------------------------------------------------------------------------------------------------------------|------------------------------------------------------------------------------------------------------------------------------------------------------------------------------------------------------------------------------------------------------------------------------------------------------------------------------------------------------------------------------------------------------------------------------------------------------------------|
| EPI_ISL_453337                                                 | Virology Department, Royal Infirmary of Edinburgh, NHS Lothian / School of Biological Sciences, University of Edinburgh / Institute of Genetics and Molecular Medicine, University of Edinburgh | COVID-19 Genomics UK (COG-UK) Consortium                                                                                           | McHugh M, Dewar R, Rooke S, Gallagher M, Bateaza C, O'Roole A, Scher E, Hill V, McCrone JT, Colquhoun R, Yu X, Jackson B, Rambaut A, Williams TC, Templeton K                                                                                                                                                                                                                                                                                                    |
| EPI_ISL_445075                                                 | Laboratoire National de Santé, Microbiology, Virology                                                                                                                                           | Laboratoire National de Santé, Microbiology, Epidemiology and Microbial Genomics                                                   | Anke Wienecke-Baldacchino, Ardshel Latsuzhba, Jessica Trapp, Catherine Ragimbeau, Guillaume Fournier, Tamir Abdelrahman, Trung Nguyen Nguyen, Joel Mossong                                                                                                                                                                                                                                                                                                       |
| EPI_ISL_450339, EPI_ISL_450344                                 | Bangladesh Institute of Tropical & Infectious Diseases, COVID-19 Testing Laboratory                                                                                                             | Basic and Applied Research on Jute Project                                                                                         | Rasel Ahmed, Md. Sabir Hossain, Shah Md Tamim Kabir, Emadul Mannan Emad, Md. Nazmul Haq Boy, Fattekar Ahmed Rana, Parfous Kumar Biswas, M A Hassan Chowdhury, Md. Shaqueel Ahmed, Md. Samiul Haque, Md. Monjur Alam, Md. Sharifur Rahman, A S M Ammarul Haq, Md. Shahidul Islam, Gouam Budhra Das, A/AM Zoned Siddik                                                                                                                                             |
| EPI_ISL_451202                                                 | Uganda Virus Research Institute                                                                                                                                                                 | MRC/UVRI & LSHTM Uganda Research Unit                                                                                              | Dan Lule Bugembe, John Kaywa, My V, T Phan, Phionah Tushaba, Stephen Baimardi, Beatrice Dhaala, Deogratius Ssemwanga, Jonas Lexow, Henry Mwabesa, Janae Aceng, Henry Kyobe, Julius Luvwama, Pontiano Kaleebu, Matthew Cotten                                                                                                                                                                                                                                     |
| EPI_ISL_451644                                                 | Laboratory of Molecular Biology, Diagnostyka sp. z o.o.                                                                                                                                         | Laboratory of Recombinant Vaccines                                                                                                 | Lukasz Rabalski, Anna Piotrowska-Malejska, Maciej Kosinski, Boguslaw Szewczyk, Krystyna Bienkowska-Szewczyk                                                                                                                                                                                                                                                                                                                                                      |
| EPI_ISL_451653                                                 | Hematology Laboratory, Section of Molecular Diagnostics, University Clinical Centre, Medical University of Gdansk                                                                               | Laboratory of Recombinant Vaccines                                                                                                 | Lukasz Rabalski, Adam Sodzi, Aneta Szulc, Krzysztof Lewandowski, Ewa Mlodzi, Mariena Robakowska, Boguslaw Szewczyk, Krystyna Bienkowska-Szewczyk                                                                                                                                                                                                                                                                                                                 |
| EPI_ISL_453627, EPI_ISL_453662                                 | Queens Medical Centre, Clinical Microbiology Department, DeepSeq Nottingham                                                                                                                     | COVID-19 Genomics UK (COG-UK) Consortium                                                                                           | Gemma Clark, Wendy Smith, Manjinder Khakh, Hannah Howson-Weils, Jonathan Ball, Patrick McCure, Joseph Chappell, Theodoras Tsoleridis, Nadine Holmes, Matthew Carlisle, Christopher Inboor, Fel Sang, Johnny Debevo, Victoria Wright, Matthew Loose                                                                                                                                                                                                               |
| EPI_ISL_454221                                                 | RSE "National Center for Biotechnology"                                                                                                                                                         | Instituto Nacional de Saude (INSA)                                                                                                 | Alexandr Shvartsov, Ilyas Akhmedolayev, Viktoriya Lutsay, Asyulan Amrigazin, Askar Abdaliev, Abola Rakhmetova, Zabrina Aushakmetova, Kalender, Yelhan Ramankulov                                                                                                                                                                                                                                                                                                 |
| EPI_ISL_454497                                                 | RSE "National Center for Biotechnology"                                                                                                                                                         | RSE "National Center for Biotechnology"                                                                                            | Alexandr Shvartsov, Ilyas Akhmedolayev, Viktoriya Lutsay, Asyulan Amrigazin, Askar Abdaliev, Abola Rakhmetova, Zabrina Aushakmetova, Ramankulov Yelhan                                                                                                                                                                                                                                                                                                           |
| EPI_ISL_454585                                                 | Laboratory of virology, National Center of Expertise                                                                                                                                            | Laboratory of molecular-genetic research, National Center for Expertise, Kazakhstan National Center for Biotechnology, Kazakhstan  | Abdjaliev Askar, Shvartsov Alexandr, Akhmedolayev Ilyas, Kalender Ruslan, Rakhmetova Abola, Lutsay Viktoriya, Amrigazin Asyulan, Aushakmetova Zabrina, Ramankulov Yelhan                                                                                                                                                                                                                                                                                         |
| EPI_ISL_455092, EPI_ISL_455099                                 | South Eastern Area Laboratory Services                                                                                                                                                          | NSW Health Pathology - Institute of Clinical Pathology and Medical Research, Westmead Hospital, University of Sydney               | CIDM-PH et al.                                                                                                                                                                                                                                                                                                                                                                                                                                                   |
| EPI_ISL_455476                                                 | Laboratory for Respiratory Viruses, Cantacuzino National Military Medical Institute for Research and Development                                                                                | Cantacuzino Institute                                                                                                              | MLazar, L.Ustia, A.Creiu, T.Durfee                                                                                                                                                                                                                                                                                                                                                                                                                               |
| EPI_ISL_455570                                                 | Gundersen Molecular Diagnostics Laboratory                                                                                                                                                      | Kabarata Cancer Research Institute                                                                                                 | Craig S. Richmond, Parate A. Kenny                                                                                                                                                                                                                                                                                                                                                                                                                               |
| EPI_ISL_455635                                                 | KRISP, KZN Research Innovation and Sequencing Platform                                                                                                                                          | KRISP, KZN Research Innovation and Sequencing Platform                                                                             | Gandhari J. Pillay, S. Lessels R, Chimukangara B, Doloriche K, Tegally H, Wilkinson E, de Oliveira T                                                                                                                                                                                                                                                                                                                                                             |
| EPI_ISL_455969                                                 | Department of Clinical Microbiology                                                                                                                                                             | GIGA Medical Genomics                                                                                                              | Cathy L., Seemann T., Sait, M., Schultz M., Duce J., Sherry, N.                                                                                                                                                                                                                                                                                                                                                                                                  |
| EPI_ISL_456476, EPI_ISL_456516, EPI_ISL_456539                 | Victorian Infectious Diseases Reference Laboratory (VIDRL)                                                                                                                                      | Microbiological Diagnostic Unit Public Health Laboratory and Victorian Infectious Diseases Reference Laboratory, Doherty Institute | Keith Durkin, Maria Artes, Sébastien Bonmans, Raphael Boreux, Céclie Meek, Perrante Mellin, Marie-Pierre Heyette, Vincent Bours.                                                                                                                                                                                                                                                                                                                                 |
| EPI_ISL_456797                                                 | West of Scotland Specialist Virology Centre, NHSGGC / MRC-University of Glasgow Centre for Virus Research                                                                                       | COVID-19 Genomics UK (COG-UK) Consortium                                                                                           | Ana da Silva Filipe, Natasha Johnson, Kathy Smollett, Daniel Mar, Stephen Carmichael, Lily Tong, Jemma Nichols, Elinu Aranday-Corres, Kristyn Brunker, Yasmin Parr, Kyriaki Nomiou, Sarah McDonald, Marc Niebel, Patavwe Asamspan, Richard Orion, Joseph Hughes, Steenu Vattipally, David L. Robertson, Alasdair Maclean, Rory Gunson, Karyn Li, Natasha Jesudason, Rajiv Shah, James Shepherd, Antonia Ho, Emma Thomson                                         |
| EPI_ISL_458150                                                 | ANOUAL                                                                                                                                                                                          | ANOUAL                                                                                                                             | Jouali Farah, El Anasri Fatima Zahra, Marichoudi Nabila, Kasmi Yessine, Cherroui Mohamed, El Altani Assam, Benhida Raedhi, Azami Nawfel, Klarene Dissa Lahlou, Loukrnan Salma, Fekak, Jamel                                                                                                                                                                                                                                                                      |
| EPI_ISL_459905, EPI_ISL_459906                                 | Laboratoire National de Santé, Microbiology, Virology                                                                                                                                           | Laboratoire National de Santé, Microbiology, Epidemiology and Microbial Genomics                                                   | Anke Wienecke-Baldacchino, Jéssica Trapp, Guillaume Fournier, Trung Nguyen Nguyen, Catherine Ragimbeau                                                                                                                                                                                                                                                                                                                                                           |
| EPI_ISL_461006, EPI_ISL_461373, EPI_ISL_461391                 | Dutch COVID-19 response team                                                                                                                                                                    | Erasmus Medical Center                                                                                                             | Bas Oude Munnink, David Neuenhuyse, Reina Sikkema, Claudia Schepperink, Ina Orestakova, Anne van der Linden, Theo Bastleboer, Stefan van Nieuwkoop, Mark Prok, Pascal Lexmond, Corien Swaan, Manon Swaan, Madelief Moliers, Mark Stein, Sandra Kengne Kamga Moubou, Jeroen van Kampen, Jolanda Voermans, Aura Timen, Corine GeurtsvanKessel, Annemiek van der Eijk, Richard Woldenkamp, Marion Koopmans, on behalf of the Dutch national COVID-19 response team. |
| EPI_ISL_462435                                                 | unknown                                                                                                                                                                                         | Laboratory Diagnostic                                                                                                              | Vidanovic D., Tesovic B., Banovic Djevi B., Krizevic A., Janovic M., Sekler M., Dmitric M., Petrovic T., Volkening J., Alonso C.L.                                                                                                                                                                                                                                                                                                                               |
| EPI_ISL_463024                                                 | Institute of Life Sciences, Bhubaneswar                                                                                                                                                         | Immunogenomics lab, Institute of Life Sciences, Bhubaneswar                                                                        | Sunil Rajnar, Anup Ghosh, Atmika Jha, Viplov K, Biswas Swati Madhulika, Manasi Prasadarshini, Shuchi Smita, Kausik Sen, Hiren G, Dooda, Deepak Singh, Jety Charvia, Shamima Ansari, Rupesh Dash, Soma Chattopadhyay, Ghulam Hussain Syed, Shanti Sarapat, Tushar K, Bauria, Rajesh Swain, Punil Prasad, ILS COVID-19 TEAM, Orissa COVID-19 Study Group, DBT's PAN-INDIA 1000 SARS-CoV2 RNA genome sequencing consortium, Aiyay Parida                            |
| EPI_ISL_465602                                                 | Respiratory Virus Unit, Microbiology Services Collindale, Public Health England                                                                                                                 | Respiratory Virus Unit, Microbiology Services Collindale, Public Health England                                                    | PHE Covid Sequencing Team                                                                                                                                                                                                                                                                                                                                                                                                                                        |
| EPI_ISL_466905, EPI_ISL_466909, EPI_ISL_466910, EPI_ISL_466919 | Max von Pettenkofer Institute, Virology, National Reference Center for Retroviruses, LMU München                                                                                                | Laboratory for Functional Genome Analysis, Dept. Genomics, Gene Center of the LMU Munich                                           | Max Muenchhoff, Stefan Krebs, Alexander Graf, Oliver Keppler, Helmut Blum                                                                                                                                                                                                                                                                                                                                                                                        |
| EPI_ISL_467014                                                 | Voivler AG                                                                                                                                                                                      | Department of Biosystems Science and Engineering, ETH Zurich                                                                       | Christian Betsel, Sarah Nadeau, Van Topolsky, Pedro Ferreira, Philipp Jablonski, Susana Posada-Céspedes, Tobias Schar, Ina Nissen, Natascia Santoroce, Etienne Burcklen, Christiane Beckmann, Maurice Redondo, Olivier Kober, Christoph Noppin, Sophie Sidel, Neemie Santamaria de Souza, Niko Beerenwinkel, Tanja Stadler                                                                                                                                       |
| EPI_ISL_467195                                                 | Hospital General Universitario Gregorio Marañon                                                                                                                                                 | SeqCOVID-SPAIN consortium/IB/CSIC                                                                                                  | Laura Pérez-Lago, Maria Herranz, Jon Sotillo, Julia Suárez, Pilar Calatá, Patricia Muñoz, Dario Garcia de Vedra and SeqCOVID-SPAIN consortium                                                                                                                                                                                                                                                                                                                    |

|                                                                                |                                                                                                                                                                                                 |                                                                                                                                                                                         |                                                                                                                                                                                                                                                                                                                                                                                                                                                                                                                                                           |
|--------------------------------------------------------------------------------|-------------------------------------------------------------------------------------------------------------------------------------------------------------------------------------------------|-----------------------------------------------------------------------------------------------------------------------------------------------------------------------------------------|-----------------------------------------------------------------------------------------------------------------------------------------------------------------------------------------------------------------------------------------------------------------------------------------------------------------------------------------------------------------------------------------------------------------------------------------------------------------------------------------------------------------------------------------------------------|
| EPI_ISL_467476                                                                 | Molecular Diagnostics Services (MDS)                                                                                                                                                            | KRISp, KZN Research Innovation and Sequencing Platform                                                                                                                                  | Gandhari J, Pillay S, Lessells R, Chimukangara B, Malalose K, York D, Khan S, Tegally H, Wilkinson E, de Oliveira T                                                                                                                                                                                                                                                                                                                                                                                                                                       |
| EPI_ISL_467493, EPI_ISL_467507, EPI_ISL_467519                                 | NHL-SALCH                                                                                                                                                                                       | KRISp, KZN Research Innovation and Sequencing Platform                                                                                                                                  | Gandhari J, Pillay S, Lessells R, Chimukangara B, Malalose K, York D, Khan S, Tegally H, Wilkinson E, de Oliveira T                                                                                                                                                                                                                                                                                                                                                                                                                                       |
| EPI_ISL_468156                                                                 | Romania, Bucharest National Institute for Infectious Diseases "Prof. Dr. Matei Bal" <ul style="list-style-type: none"> <li>unknown</li> </ul>                                                   | Romania, Bucharest National Institute for Infectious Diseases "Prof. Dr. Matei Bal"                                                                                                     | Leontina Barnea, Marius Colic, Corina Casanquiu, Marius Surescu, Simona Paraschiv                                                                                                                                                                                                                                                                                                                                                                                                                                                                         |
| EPI_ISL_468159                                                                 | unknown                                                                                                                                                                                         | Department of Virology, "Public Health Laboratories Division, National Institute of Health                                                                                              | Masab Uthair, Amer Ikram, Muhammad Salman, Adrian Khushid, Nazish Bader, Shannon Whitner, John Kiema                                                                                                                                                                                                                                                                                                                                                                                                                                                      |
| EPI_ISL_468758                                                                 | Laboratorio de Biología Molecular, Facultad de Medicina, Universidad de Atacama                                                                                                                 | Center for Mathematical Modeling and Center for Genome Regulation, Santiago, Chile                                                                                                      | Gaete A, Tavazny D, Palma R, Urra C, Vargas M, Alencar M., Maass A, González M, C Echeverría                                                                                                                                                                                                                                                                                                                                                                                                                                                              |
| EPI_ISL_469254                                                                 | National Institute for Viral Disease Control and Prevention, China CDC                                                                                                                          | Institute of Viral Disease Control and Prevention, China CDC                                                                                                                            | Wenjie Tan, Lijuan Chen, Peihua NiuBaoying Huang, Li Zhao, Yabei Bi, Wenling Wang, Roujian Lu, Dayan Wang, Wenbo Xu, George Fu Gao, Chun Huang, Guizhen Wu                                                                                                                                                                                                                                                                                                                                                                                                |
| EPI_ISL_469275                                                                 | Egyptian National Cancer Institute (ENCI)                                                                                                                                                       | Human Genome Center                                                                                                                                                                     | Zeki, Abdel Rahman N, Amer K.E., Ahmed O.S., Soliman,H.K., Hafez M.M., Bahassy A.A., Abdelhamed W., Gaf A., Alim, Hassan W., Samir,M., Raouf A., Hamdy,M.S., Sorriani,M.S., Eisiy,M.H., Elkhatieb,S.M., Ezzebarah,M.H., Abouelkhalda, Mohamed                                                                                                                                                                                                                                                                                                             |
| EPI_ISL_469277                                                                 | Mohammed Bin Rashid University of Medicine and Health Sciences                                                                                                                                  | Al Jallia Genomics Center                                                                                                                                                               | Ahmed Abou Tayoun, Tom Loney, Hamda Kirsansheh, Sathishkumar Ramaswamy, Divinlal Harilal, Zilla Onar Deesi, Raju Murthy Varigesse, Hanan Al Suwaidi, Abdumajeed Alkhalja, Mohammed Uddin, Rifat Hamoudi, Rabih Halwani, Abiola Catherine Senok, Qurayha Hamid, Norbert Nowotny, Alawi Alsheikh-Ali                                                                                                                                                                                                                                                        |
| EPI_ISL_469294                                                                 | Keio University Hospital                                                                                                                                                                        | Keio University Hospital                                                                                                                                                                | Kenjiro Kosaki                                                                                                                                                                                                                                                                                                                                                                                                                                                                                                                                            |
| EPI_ISL_470876                                                                 | Department for Virology, Molecular Biology and Genome Research, R. G. Lugar Center for Public Health Research, National Center for Disease Control and Public Health (NCDC) of Georgia.         | Department for Virology, Molecular Biology and Genome Research, R. G. Lugar Center for Public Health Research, National Center for Disease Control and Public Health (NCDC) of Georgia. | Giorgi Tomashvili, Meri Partsalua, Gvantsa Brachvili, Gvantsa Chanturia, Ann Meechabulishvili, Nato Kolara, Marne Murtskvaladze, Lela Sabadze, Mari Gavrusheidze, Ana Popkharuri, Taa Imradze, Tamaz Jashvashvili, Taa Tsvetozidze, Keaven Sidemondze, Ekaterine Khamladze, Ekaterine Zingenti, Reona Sukhashvili, Mariam Zakalashvili, Lela Ushadze, Magda Dpebanadze, Davit Tsagulia, Ekaterine Zangpladze, Nino Pershili, Adam Kotorashvili, Maia Alkhasashvili, Irma Bujnandze, Anna Kasratze, Khatuna Zakhashvili, Paata Imnadze, Amiran Gankheidze. |
| EPI_ISL_471167                                                                 | MRCG at LSHTM Genomics lab                                                                                                                                                                      | MRCG at LSHTM Genomics lab                                                                                                                                                              | Luiza Ustrea, Nicoleta Paraschiv, Tim Durfee, Mhaela Lazer                                                                                                                                                                                                                                                                                                                                                                                                                                                                                                |
| EPI_ISL_471176                                                                 | Hospital of Southern Norway - Kristiansand, Department of Medical Microbiology                                                                                                                  | Nonwegian Institute of Public Health, Department of Virology                                                                                                                            | Kathrine Stene-Johansen, Kamilla Heddeland Instefjord, Hilde Elishaug, Rasmus Flis Kopperud, Karoline Bragsstad, Olav Hungnes                                                                                                                                                                                                                                                                                                                                                                                                                             |
| EPI_ISL_471270                                                                 | Hospital Oncologico Solca Nucleo de Quito                                                                                                                                                       | Institute of Microbiology, Universidad San Francisco de Quito                                                                                                                           | Sully Márquez, Belén Prado-Vivar, Juan José Guadalupe, Bernardo Gutiérrez, Marcos D. Stefano, Graces Salazar, Verónica Barragán, Patricio Rojas-Silva                                                                                                                                                                                                                                                                                                                                                                                                     |
| EPI_ISL_471416                                                                 | Laboratory for Respiratory Viruses, National Influenza Centre, Cantuzuzo National Military-Medical Institute for Research and Development                                                       | Cantuzuzo Institute                                                                                                                                                                     | Gabriel Trieba, Michelle Gutierrez, Pauli Cárdenas                                                                                                                                                                                                                                                                                                                                                                                                                                                                                                        |
| EPI_ISL_471430, EPI_ISL_471431                                                 | Department of Clinical Microbiology                                                                                                                                                             | GIGA Medical Genomics                                                                                                                                                                   | Luiza Ustrea, Nicoleta Paraschiv, Tim Durfee, Mhaela Lazer                                                                                                                                                                                                                                                                                                                                                                                                                                                                                                |
| EPI_ISL_472622, EPI_ISL_472679, EPI_ISL_472883, EPI_ISL_473104, EPI_ISL_473292 | Wales Specialist Virology Centre Sequencing lab: Pathogen Genomics Unit                                                                                                                         | COVID-19 Genomics UK (COG-UK) Consortium                                                                                                                                                | Catherine Moore, Johnathan Evans, Laura Gifford, Malorie Perry, Simon Cottrell, Angela Marchbank, Alec Birchley, Alexander Adams, Amy Gaslin, Bree Gatica-Wilcox, Jason Coombes, Joel Soudjgale, Lauren Gilbert, Lee Graham, Nicole Paschianri, Sara Kunzener-Summenhayes, Sarah Taylor, Sophie Jones, Sara Hey, Matthew Bull, Joanne Walkins, Sally Cordein, Tom Connor                                                                                                                                                                                  |
| EPI_ISL_473362                                                                 | University of Birmingham                                                                                                                                                                        | COVID-19 Genomics UK (COG-UK) Consortium                                                                                                                                                | Institute of Microbiology, University of Birmingham, Claire McLuray, Joanne Stockton, Samuel Nicholas, Redoslava Poplavskii, Will Rowe, Josh Quick, Nicholas Loman, University of Birmingham Tissue Laboratory, Céline M Whalley, Andrew Besworth, Charlotte Poxon, Kasun Wangasooriya, Oliver Pickles, Mike Kidd, Alex Richter, Andrew D Heagles PHE Heartlands Lab, Husain Omar, Andrew Besworth, Queen Elizabeth Hospital, Anna Casey                                                                                                                  |
| EPI_ISL_473813, EPI_ISL_473948                                                 | Virology Department, Royal Infirmary of Edinburgh, NHS Lothian / School of Biological Sciences, University of Edinburgh / Institute of Genetics and Molecular Medicine, University of Edinburgh | COVID-19 Genomics UK (COG-UK) Consortium                                                                                                                                                | McHugh M, Dewar R, Rooke S, Gallagher M, Balcezza C, O'Toole A., Schar E, Hill V, McCrone JT, Colquhoun R, Yu X, Jackson B, Rambaut A, Williams TC, Templeton K                                                                                                                                                                                                                                                                                                                                                                                           |
| EPI_ISL_474675                                                                 | Originating lab: Wales Specialist Virology Centre Sequencing lab: Pathogen Genomics Unit                                                                                                        | COVID-19 Genomics UK (COG-UK) Consortium                                                                                                                                                | Catherine Moore, Johnathan Evans, Laura Gifford, Malorie Perry, Simon Cottrell, Angela Marchbank, Alec Birchley, Alexander Adams, Amy Gaslin, Bree Gatica-Wilcox, Jason Coombes, Joel Soudjgale, Lauren Gilbert, Lee Graham, Nicole Paschianri, Sara Kunzener-Summenhayes, Sarah Taylor, Sophie Jones, Sara Hey, Matthew Bull, Joanne Walkins, Sally Cordein, Tom Connor                                                                                                                                                                                  |
| EPI_ISL_474819                                                                 | Complejo Hospitalario Universitario de Albasce                                                                                                                                                  | SeqCOVID-SPAIN consortium(IBV/CSC)                                                                                                                                                      | Encarnacion Simarro Cortoba, Julia Lozano Serra, Lorena Robles Fonseca, Mónica Parra Grandes, Caridad Sanz de Baranda Carrino and SeqCOVID-SPAIN consortium                                                                                                                                                                                                                                                                                                                                                                                               |
| EPI_ISL_475026                                                                 | Banas Medical College and Research Institute                                                                                                                                                    | Gujarat Biotechnology Research Centre                                                                                                                                                   | Sunil R Joshi, Viren s Doshi, Pritesh Sabara, Anuravashin Pivvar, Janvi Ravali, Zarra Patel, Monika Gandhi, Pinal Trivedi, Mahatshi Pandya, Nikhil Patel, Nihil Saravjya, Raqhwandra Kumar, Dinesh Kinnari, Zubir Sayed, Komal Patel, Labdhi Pandya, Shehali Bagatharia, Radhika Khara, Neha Rajpara, R D Dixit, A M Karki, Harsh Barchi, Chaitanya Joshi, Madhu Joshi                                                                                                                                                                                    |
| EPI_ISL_475082                                                                 | Lab voor klinische biologie                                                                                                                                                                     | Onderzoeksgroep Virologie                                                                                                                                                               | Nick Verbeeke, Laurens Lamprochts, Marthe Pauwels, Bruno Verhasselt, Lino Vandekerckhove, Hans Nauwynck, Sebastiaan Theunys                                                                                                                                                                                                                                                                                                                                                                                                                               |
| EPI_ISL_475165                                                                 | National Institute of Laboratory Medicine and Referral Center                                                                                                                                   | Genomic Research Lab, BCSIR                                                                                                                                                             | Shahina Akter, Abu Sayeed Mohammad Mahmud, Mohammad Samir Uzzaman, Eshtar Osman, Md. Ahsan Habib, Tanjina Akhter Baru, Md. Mursheed Hasan Sarkar, Barua Goswami, Ifrat Jahan, Md. Saddam Hossain, Tasrin Nafisa, Md. Maruf Ahmed Molla, Mahmuda Yasmin, Asisi Kumar Ghosh, Bayzid Bin Monir, A. K. M. Shamsuzzaman, Sheikh Md. Salim Al Din, Utpal Chandra Ray, Saikat Ahmed Sajib, Md. Salim Khan                                                                                                                                                        |
| EPI_ISL_475169                                                                 | National Institute of Laboratory Medicine and Referral Center                                                                                                                                   | Genomic Research Lab, BCSIR                                                                                                                                                             | Md. Saddam Hossain, Abu Sayeed Mohammad Mahmud, Mohammad Samir Uzzaman, Eshtar Osman, Md. Ahsan Habib, Shahina Akter, Tanjina Akhter Baru, Md. Mursheed Hasan Sarkar, Barua Goswami, Ifrat Jahan, Tasrin Nafisa, Md. Maruf Ahmed Molla, Mahmuda Yasmin, Asisi Kumar Ghosh, Bayzid Bin Monir, A. K. M. Shamsuzzaman, Sheikh Md. Salim Al Din, Utpal Chandra Ray, Saikat Ahmed Sajib, Md. Salim Khan                                                                                                                                                        |
| EPI_ISL_475516                                                                 | Uppsala Narakut Aleris                                                                                                                                                                          | The Public Health Agency of Sweden                                                                                                                                                      | Oskar Karlsson Lindqvist, Maria Lind Karberg, Mattias Haukander, Peza Avari, Olov Svarstam, Anna-Malin Lunde, Sandra Brodsson, Mia Bryfving, Anna Fjoberg, Karin Tegmark-Wisell                                                                                                                                                                                                                                                                                                                                                                           |
| EPI_ISL_476086                                                                 | Violier AG                                                                                                                                                                                      | Department of Biosystems Science and Engineering, ETH Zurich                                                                                                                            | Christian Besel, Sarah Nadeau, Van Topolovskiy, Pedro Ferreira, Philipp Jablonski, Susana Posada-Céspedes, Tobias Schär, Ina Nissen, Natasscha Samardoc, Elodie Bucklen, Christian Beckmann, Maurice Redondo, Olivier Kobel, Christoph Moppert, Sophie Sedel, Noemie Santamaria de Souza, Niko Baerenwinkel, Tanja Stadler                                                                                                                                                                                                                                |
| EPI_ISL_476149                                                                 | Institut Pasteur Dakar                                                                                                                                                                          | Institut Pasteur de Dakar                                                                                                                                                               | Ndongo Dia, Moussa Mose Diagne, Mamadou Diop, Ousmane Faye, Amadou Alpha Sall                                                                                                                                                                                                                                                                                                                                                                                                                                                                             |
| EPI_ISL_476561                                                                 | Hospital Garrahan                                                                                                                                                                               | Hélias                                                                                                                                                                                  | Roberta Crespo, Dalmacio Pereyra, Mauricio Grisolia, Cristian Rohr, Andrea Mangano, Maria Florencia Fernandez, Fabian Fay, Martin Vazquez                                                                                                                                                                                                                                                                                                                                                                                                                 |
| EPI_ISL_476567                                                                 | Hospital de Pediatría "Prof. Dr. Juan P Garrahan"                                                                                                                                               | Hélias                                                                                                                                                                                  | Dalmacio Pereyra, Roberta Crespo, Mauricio Grisolia, Cristian Rohr, Andrea Mangano, Maria Florencia Fernandez, Fabian Fay, Martin Vazquez                                                                                                                                                                                                                                                                                                                                                                                                                 |
| EPI_ISL_476568                                                                 | Hospital de Pediatría "Prof. Dr. Juan P Garrahan"                                                                                                                                               | Hélias                                                                                                                                                                                  | Cristian Rohr, Andrea Mangano, Maria Florencia Fernandez, Dalmacio Pereyra, Roberta Crespo, Mauricio Grisolia, Fabian Fay, Martin Vazquez                                                                                                                                                                                                                                                                                                                                                                                                                 |
| EPI_ISL_476936, EPI_ISL_476939                                                 | KU Leuven, Rega Institute, Clinical and Epidemiological Virology                                                                                                                                | KU Leuven, Rega Institute, Clinical and Epidemiological Virology                                                                                                                        | Tony Wawina-Bokalanga, Joan Mari-Caterras, Bart Vanmechelen, Pat Maes                                                                                                                                                                                                                                                                                                                                                                                                                                                                                     |
| EPI_ISL_477128, EPI_ISL_477132                                                 | Child Health Research Foundation                                                                                                                                                                | Child Health Research Foundation                                                                                                                                                        | Sanjuti Saha, Md Saiful Islam Sajib, Roy Malaker, Md Hafiz Rahman, Afroza Akter Tanni, Syed Mukadir, Al Sum, Maksuda Islam, Samir K Saha                                                                                                                                                                                                                                                                                                                                                                                                                  |
| EPI_ISL_477150                                                                 | Institut Pasteur Dakar                                                                                                                                                                          | Institut Pasteur de Dakar                                                                                                                                                               | Ndongo Dia, Moussa Mose Diagne, Mamadou Diop, Mamadou Malalo Jallow, Marie Henniéte Dior Ndione, Safiou Sankhe, Ousmane Faye, Amadou Alpha Sall.                                                                                                                                                                                                                                                                                                                                                                                                          |



|                                                |                                                                                                                                                                                         |                                                                                                                                                                                         |                                                                                                                                                                                                                                                                                                                                                                                                                                                                        |
|------------------------------------------------|-----------------------------------------------------------------------------------------------------------------------------------------------------------------------------------------|-----------------------------------------------------------------------------------------------------------------------------------------------------------------------------------------|------------------------------------------------------------------------------------------------------------------------------------------------------------------------------------------------------------------------------------------------------------------------------------------------------------------------------------------------------------------------------------------------------------------------------------------------------------------------|
| EPI_ISL_477169                                 | Department for Virology, Molecular Biology and Genome Research, R. G. Lugar Center for Public Health Research, National Center for Disease Control and Public Health (NCDC) of Georgia. | Department for Virology, Molecular Biology and Genome Research, R. G. Lugar Center for Public Health Research, National Center for Disease Control and Public Health (NCDC) of Georgia. |                                                                                                                                                                                                                                                                                                                                                                                                                                                                        |
| EPI_ISL_477648, EPI_ISL_477659                 | Virginia DCIS                                                                                                                                                                           | Virginia DCIS                                                                                                                                                                           |                                                                                                                                                                                                                                                                                                                                                                                                                                                                        |
| EPI_ISL_478060, EPI_ISL_478079, EPI_ISL_478109 | West of Scotland Specialist Virology Centre, NHSGGC / MRC-University of Glasgow Centre for Virus Research                                                                               | COVID-19 Genomics UK (COG-UK) Consortium                                                                                                                                                | Ana da Silva Filipe, Natasha Johnson, Kathy Smollett, Daniel Mair, Stephen Carmichael, Lily Tong, Jenna Nichols, Eilhu Aranday-Cortes, Krisynn Brunker, Yasmin Parr, Alice Broos, Kyriaki Nomioku, Sarah McDonnell, Marc Niebel, Patavue Assembran, Richard Orton, Joseph Hughes, Sreenu Vattipally, David L Robertson, Alastair Maclean, Roy Gurnson, Kathy LI, Natasha Jesudason, Rajiv Shah, James Shephard, Antonia Ho, Emma Thomson                               |
| EPI_ISL_479451                                 | Wales Specialist Virology Centre Sequencing lab: Pathogen Genomics Unit                                                                                                                 | COVID-19 Genomics UK (COG-UK) Consortium                                                                                                                                                | Catherine Moore, Johnathan Evans, Laura Gifford, Malorie Perry, Simon Cottrell, Angela Marchbank, Alec Birchley, Alexander Adams, Amy Gaslin, Bree Gatica-Wilcox, Jason Coombes, Joel Soutigante, Lauren Gilbert, Lee Graham, Nicole Patchariani, Sara Kuznievs-Summerhayes, Sarah Taylor, Sophie Jones, Sara Ray, Matthew Bull, Joanne Watkins, Sally Corden, Tom Connor                                                                                              |
| EPI_ISL_479553                                 | NIV Influenza                                                                                                                                                                           | NIV Influenza                                                                                                                                                                           |                                                                                                                                                                                                                                                                                                                                                                                                                                                                        |
| EPI_ISL_479592                                 | National Public Health Laboratory, National Centre for Infectious Diseases                                                                                                              | National Public Health Laboratory, National Centre for Infectious Diseases                                                                                                              |                                                                                                                                                                                                                                                                                                                                                                                                                                                                        |
| EPI_ISL_480256                                 | Genomic Laboratory (GLAB) / Conjoint lab of Health Directorat of Istanbul and Istanbul Technical University                                                                             | Genomic Laboratory (GLAB), Istanbul Technical University                                                                                                                                | Ilker Karacan, Tugba Kizilboga Aygun, Bugra Agaoglu, Gizem Aktur, Jale Yildiz, Betül Kfise, Elifnaz Çelik, Arzu Irem, Yasemin Kendir Demirkol, Ozlem Aygun Dogan, Mehmet Aydin, Levent Doganay, Gizem Dincer Doganay                                                                                                                                                                                                                                                   |
| EPI_ISL_480302, EPI_ISL_480305, EPI_ISL_480308 | National Reference Laboratory "Influenza and acute respiratory diseases" (VIDRL)                                                                                                        | NRL-HIV                                                                                                                                                                                 | Ivan Ivanov, Ivailo Alexiev, Iva Philipova                                                                                                                                                                                                                                                                                                                                                                                                                             |
| EPI_ISL_480650                                 | Victorian Infectious Diseases Reference Laboratory                                                                                                                                      | VIDRL and MDU-PHL                                                                                                                                                                       |                                                                                                                                                                                                                                                                                                                                                                                                                                                                        |
| EPI_ISL_481536, EPI_ISL_481674                 | Department of Virology and Immunology, University of Helsinki and Helsinki University Hospital, HUSLAB Finland                                                                          | Department of Virology, Faculty of Medicine, University of Helsinki, Helsinki, Finland                                                                                                  | Teemu Smura, Hannimar Kallio-Kokko, Jenni Vitranen, Maija Suvario, Sari Hannula, Hatri Kangas, Pekka Elonen, Olli Vapalahti                                                                                                                                                                                                                                                                                                                                            |
| EPI_ISL_481831                                 | PHE South West Regional Laboratory, National Infection Service                                                                                                                          | Wellcome Sanger Institute for the COVID-19 Genomics UK (COG-UK) consortium                                                                                                              | Stephanie Hutchings, Hannah Pyrront, Dr Peter Muir, Barry Vipond, Rich Hopes, and Alex Alderton, Roberto Arano, Sonia Gonçalves, Ewan Harrison, David K. Jackson, Ian Johnston, Dominic Kwiatkowski, Cordelia Langford, John Sillitoe on behalf of the Wellcome Sanger Institute COVID-19 Surveillance Team ( <a href="http://www.sanger.ac.uk/covid/team">http://www.sanger.ac.uk/covid/team</a> )                                                                    |
| EPI_ISL_482708                                 | Molecular Diagnostics Services (MDS)                                                                                                                                                    | KRISFP, KZN Research Innovation and Sequencing Platform                                                                                                                                 | Ghandhari J, Pillay S, Lessells R, Chimukangara B, Mdlatose K, York D, Khan S, Tegally H, Wilkinson E, de Oliveira T                                                                                                                                                                                                                                                                                                                                                   |
| EPI_ISL_482726                                 | NHL-S-ALCH                                                                                                                                                                              | KRISFP, KZN Research Innovation and Sequencing Platform                                                                                                                                 | Ghandhari J, Pillay S, Lessells R, Chimukangara B, Mdlatose K, York D, Khan S, Tegally H, Wilkinson E, de Oliveira T                                                                                                                                                                                                                                                                                                                                                   |
| EPI_ISL_482762                                 | Medical AIn Shams Research Institute (MASRI), Ain Shams University                                                                                                                      | Medical AIn Shams Research Institute (MASRI), Ain Shams University                                                                                                                      | Hesham Elghazaly, Sara Hassan Ayra, Ahmad Moustafa, Hala Hafez, Sara Elrakeeg, Shaimaa Moustafa, Aya Mohamed, Reham Mamdouh, Ghada Ismael, Asriat Omar, Osama Mansour, Mahmood Elnettini                                                                                                                                                                                                                                                                               |
| EPI_ISL_482879, EPI_ISL_482885                 | CHU Pupan - Laboratoire de Virologie - Institut Fédéral de Biologie                                                                                                                     | Laboratoire de virologie - Ecole Nationale Vétérinaire de Toulouse                                                                                                                      | Hesham Elghazaly, Sara Hassan Ayra, Ahmad Moustafa, Hala Hafez, Sara Elrakeeg, Shaimaa Moustafa, Aya Mohamed, Reham Mamdouh, Ghada Ismael, Asriat Omar, Osama Mansour, Mahmood Elnettini                                                                                                                                                                                                                                                                               |
| EPI_ISL_483036                                 | Medical AIn Shams Research Institute (MASRI), Ain Shams University                                                                                                                      | Medical AIn Shams Research Institute (MASRI), Ain Shams University                                                                                                                      | Mikel J. Urrutikoetxea-Gutierrez, Ana Belén Balón de la Hoz, Maxelán Vidali-García, Iñe Carmen Nieto Toboso, Estibaliz Ugalde-Zaragoza, José Luis Díaz de Tuésota del Arco                                                                                                                                                                                                                                                                                             |
| EPI_ISL_483566                                 | Clinical Microbiology Laboratory- Basuro University Hospital                                                                                                                            | Bioocrates-Bizakia                                                                                                                                                                      |                                                                                                                                                                                                                                                                                                                                                                                                                                                                        |
| EPI_ISL_483692                                 | National Institute of Laboratory Medicine and Referral Center                                                                                                                           | Genomic Research Lab, BCSIR                                                                                                                                                             |                                                                                                                                                                                                                                                                                                                                                                                                                                                                        |
| EPI_ISL_484677                                 | West of Scotland Specialist Virology Centre, NHSGGC / MRC-University of Glasgow Centre for Virus Research                                                                               | COVID-19 Genomics UK (COG-UK) Consortium                                                                                                                                                | MD, Murtshed Hassan Sarkar, Abu Sayeed Mohammed Mahmud, Mohammed Samir Uzzaman, Esthar Osman, Md. Atahan Habib, Shahina Akter, Tanjina Akter, Barun, Barua Goswami, Ifrat Jahan, Md. Saddam Hossain, Tasnim Nahisa, Md. Maruf Ahmed Molla, Mahmuda Yasmin, Asish Kumar Ghosh, A. K. M. Shamsuzzaman, Sheikh Md. Selim Al Din, Ujjal Chandra Ray, Saikat Ahmed Sajib, Md. Salim Khan                                                                                    |
| EPI_ISL_484689                                 | Originating lab: Wales Specialist Virology Centre Sequencing lab: Pathogen Genomics Unit                                                                                                | COVID-19 Genomics UK (COG-UK) Consortium                                                                                                                                                | Ana da Silva Filipe, Natasha Johnson, Kathy Smollett, Daniel Mair, Stephen Carmichael, Lily Tong, Jenna Nichols, Eilhu Aranday-Cortes, Krisynn Brunker, Yasmin Parr, Alice Broos, Kyriaki Nomioku, Sarah McDonnell, Marc Niebel, Patavue Assembran, Richard Orton, Joseph Hughes, Sreenu Vattipally, David L Robertson, Alastair Maclean, Roy Gurnson, Kathy LI, Natasha Jesudason, Rajiv Shah, James Shephard, Antonia Ho, Emma Thomson                               |
| EPI_ISL_484700                                 | Department of Clinical Microbiology                                                                                                                                                     | GIGA Medical Genomics                                                                                                                                                                   | Catherine Moore, Johnathan Evans, Laura Gifford, Malorie Perry, Simon Cottrell, Angela Marchbank, Alec Birchley, Alexander Adams, Amy Gaslin, Bree Gatica-Wilcox, Jason Coombes, Joel Soutigante, Lauren Gilbert, Lee Graham, Nicole Patchariani, Sara Kuznievs-Summerhayes, Sarah Taylor, Sophie Jones, Sara Ray, Matthew Bull, Joanne Watkins, Sally Corden, Tom Connor                                                                                              |
| EPI_ISL_485399                                 | Institute of Human Genetics, Polish Academy of Sciences                                                                                                                                 | Institute of Human Genetics, Polish Academy of Sciences                                                                                                                                 | Keith Durkin, Maria Aresi, Sebastian Bortens, Raphael Boreux, Céline Meek, Axelle Chastain, Céline Fombellida-Lopez, Pierrette Mehn, Marie-Pierre Hayerle, Vincent Bours                                                                                                                                                                                                                                                                                               |
| EPI_ISL_485712                                 | Institut Pasteur                                                                                                                                                                        | Institut Pasteur de Dakar                                                                                                                                                               | Szymon Hydropowicz, Adam Ustażewski, Maria Kaczmarek-Ry, Emilia Lis, Ewa Zikiewicz, Micha Witt, Andrzej Pawski                                                                                                                                                                                                                                                                                                                                                         |
| EPI_ISL_486391, EPI_ISL_486413                 | Centri laboratorija                                                                                                                                                                     | Latvian Biomedical Research and Study Centre                                                                                                                                            | Ndongo Dia, Moussa Mose Diagne, Mamadou diop, Marie Herriette Dior Ndione, Mamadou Malalo Jallov, Safiatou Sanké, Ousmane Faye, Amadou Alpha Sall                                                                                                                                                                                                                                                                                                                      |
| EPI_ISL_486438                                 | E. Guljaja laboratorija                                                                                                                                                                 | Latvian Biomedical Research and Study Centre                                                                                                                                            | Ivars Silamelijs, Kaspars Megnis, Monia Ustinova, Ilija Zrelcovs, Vita Rovte, Stella Lapra, Jana Ose, Marta Priede, Uga Dumps, Jins Klovš                                                                                                                                                                                                                                                                                                                              |
| EPI_ISL_486501, EPI_ISL_486510                 | Violiier AG                                                                                                                                                                             | Department of Biosystems Science and Engineering, ETH Zurich                                                                                                                            | Christian Basel, Sarah Nadeau, Ivan Topolsky, Pedro Ferreira, Philipp Jablonksi, Susana Posada-Céspedes, Tobias Schär, Iva Nissen, Natascia Santoro, Elodie Burcken, Christiane Beckmann, Maurice Fedorodo, Olivier Kober, Christoph Noppert, Sophie Seidel, Noemie Santamaria de Souza, Niko Beerenwinkel, Tanja Stadler                                                                                                                                              |
| EPI_ISL_486834                                 | Suceava County Emergency Hospital "St. Ioan cel Nou"                                                                                                                                    | SNU Metagenomics lab                                                                                                                                                                    | Lodovic Andrei, Antoniadis Panagiotis                                                                                                                                                                                                                                                                                                                                                                                                                                  |
| EPI_ISL_487106, EPI_ISL_487110, EPI_ISL_487112 | Nigeria Centre for Disease Control (NCDC)                                                                                                                                               | African Centre of Excellence for Genomics of Infectious Diseases (ACEGID), Redeemer's University, Ede, Ogun State, Nigeria                                                              | Olunju P. E., Adegbesile F. V., Kayode A., Oguzte J., Olawube I., Uwanibe J., Uluamide T., Folarin O. A., Inekweazu C., Hapji C. T.                                                                                                                                                                                                                                                                                                                                    |
| EPI_ISL_487362                                 | National Institute of Laboratory Medicine and Referral Center                                                                                                                           | Genomic Research Lab, BCSIR                                                                                                                                                             |                                                                                                                                                                                                                                                                                                                                                                                                                                                                        |
| EPI_ISL_489335                                 | Regional Virus Laboratory, Belfast Health and Social Care Trust                                                                                                                         | Wellcome Sanger Institute for the COVID-19 Genomics UK (COG-UK) consortium                                                                                                              | Conall McCaughey, James McKenna, Tanya Curran, Susan Feeley, Alison Watt, Ciara Cox, Mairead Connor, Zoltan Molnar, David Simpson, Derek Farley, and Alex Alderton, Roberto Arano, Sonia Gonçalves, Ewan Harrison, David K. Jackson, Ian Johnston, Dominic Kwiatkowski, Cordelia Langford, John Sillitoe on behalf of the Wellcome Sanger Institute COVID-19 Surveillance Team ( <a href="http://www.sanger.ac.uk/covid/team">http://www.sanger.ac.uk/covid/team</a> ) |
| EPI_ISL_489360                                 | Violiier AG                                                                                                                                                                             | Department of Biosystems Science and Engineering, ETH Zurich                                                                                                                            | Christian Basel, Sarah Nadeau, Ivan Topolsky, Pedro Ferreira, Philipp Jablonksi, Susana Posada-Céspedes, Tobias Schär, Iva Nissen, Natascia Santoro, Elodie Burcken, Christiane Beckmann, Maurice Fedorodo, Olivier Kober, Christoph Noppert, Sophie Seidel, Noemie Santamaria de Souza,                                                                                                                                                                               |

|                                                                                                |                                                                                                                                                                                     |                                                                                                                                                       |                                                                                                                                                                                                                                                                                                                                                                                                                                                              |
|------------------------------------------------------------------------------------------------|-------------------------------------------------------------------------------------------------------------------------------------------------------------------------------------|-------------------------------------------------------------------------------------------------------------------------------------------------------|--------------------------------------------------------------------------------------------------------------------------------------------------------------------------------------------------------------------------------------------------------------------------------------------------------------------------------------------------------------------------------------------------------------------------------------------------------------|
| EPI_ISL_490022                                                                                 | South Eastern Area Laboratory Services (SEALS)                                                                                                                                      | NSW Health Pathology - Institute of Clinical Pathology and Medical Research; Westmead Hospital; University of Sydney                                  | Niko Beerenwinkel, Tanja Stadler                                                                                                                                                                                                                                                                                                                                                                                                                             |
| EPI_ISL_490089, EPI_ISL_490100, EPI_ISL_490101                                                 | Institute for Medical Research, Infectious Disease Research Centre, National Institutes of Health, Ministry of Health Malaysia                                                      | Institute for Medical Research, Infectious Disease Research Centre, National Institutes of Health, Ministry of Health Malaysia                        | Suppiah J, Mohd Zamawi Z, Kamel K, Kaljansundram J, Thayyan R                                                                                                                                                                                                                                                                                                                                                                                                |
| EPI_ISL_491041, EPI_ISL_491051, EPI_ISL_491086                                                 | Suceava County Emergency Hospital                                                                                                                                                   | "Stefan cel Mare" University Medicineomics Lab                                                                                                        | Loibuc Andrei, Antoniadis Panagiotis et al.                                                                                                                                                                                                                                                                                                                                                                                                                  |
| EPI_ISL_491169, EPI_ISL_491170                                                                 | Suceava County Emergency Hospital                                                                                                                                                   | "Stefan cel Mare" University Medicineomics Lab                                                                                                        | Loibuc Andrei et al.                                                                                                                                                                                                                                                                                                                                                                                                                                         |
| EPI_ISL_491175, EPI_ISL_491189                                                                 | Oman-National Influenza Center                                                                                                                                                      | BioTechnology & OMICS Laboratory                                                                                                                      |                                                                                                                                                                                                                                                                                                                                                                                                                                                              |
| EPI_ISL_491219                                                                                 | Instituto Gulbenkian de Ciéncia                                                                                                                                                     | Instituto Gulbenkian de Ciéncia                                                                                                                       | João Costa, Cally Paulino, João Sobral, Susana Ladeira, Ricardo Leite                                                                                                                                                                                                                                                                                                                                                                                        |
| EPI_ISL_491244                                                                                 | Instituto Gulbenkian de Ciéncia                                                                                                                                                     | Instituto Gulbenkian de Ciéncia                                                                                                                       | Cally Paulino, João Sobral, Susana Ladeira, João Costa, Ricardo Leite                                                                                                                                                                                                                                                                                                                                                                                        |
| EPI_ISL_491273                                                                                 | Instituto Gulbenkian de Ciéncia                                                                                                                                                     | Instituto Gulbenkian de Ciéncia                                                                                                                       | João Sobral, Susana Ladeira, João Costa, Cally Paulino, Ricardo Leite                                                                                                                                                                                                                                                                                                                                                                                        |
| EPI_ISL_491936                                                                                 | Institute of Microbiology, Universidad San Francisco de Quito                                                                                                                       | Institute of Microbiology, Universidad San Francisco de Quito                                                                                         | Susana Ladeira, João Costa, Cally Paulino, João Sobral, Ricardo Leite                                                                                                                                                                                                                                                                                                                                                                                        |
| EPI_ISL_491941                                                                                 | Centro de Investigaciones, Universidad de Especialidades Espíritu Santo                                                                                                             | Institute of Microbiology, Universidad San Francisco de Quito                                                                                         | Bélen Prado-Vivar, Sully Márquez, Juan José Guadalupe, Monica Becerra-Wong, Bernardo Gutiérrez, Carlos Guerrero, Verónica Barragán, Patricio Delly Andrade, Juan Carlos Fernandez, Bélen Prado-Vivar, Sully Márquez, Juan José Guadalupe, Monica Becerra-Wong, Bernardo Gutiérrez, Gabriel Moroy, Ruben Armas, José Pedro Barberán, Fernando Espinoza, Edith Lopez, Verónica Barragán, Patricio Rojas-Siva, Gabriel Trueta, Michelle Granauer, Paul Cardenas |
| EPI_ISL_491947, EPI_ISL_491949, EPI_ISL_491951                                                 | Instituto Nacional de Investigación en Salud Pública-INSPI                                                                                                                          | INSPI - Chanté                                                                                                                                        | Alfredo Bruno Calcedo, Domenica de Moura Coljona, Andress Moreira-Soto, Anna-Lena Sander, Nínia Krause, Maritza Cinedo, Denisses Portugal, Manuel Gonzalez, Silvia Salgado, Alberto Orlandi, Alexandra Usita, Juan Carlos Zaballos, Jan Felix Drexler                                                                                                                                                                                                        |
| EPI_ISL_491968, EPI_ISL_491978, EPI_ISL_491997, EPI_ISL_492010, EPI_ISL_492019                 | Oman-NIC                                                                                                                                                                            | Department of Microbiology and Immunology, SCUJH                                                                                                      | Fahad Zaidat, Samira Al-Mharqi, Amina Al-Jardani, Khaloud Al-Memmary, Hanan Al-Khrdli, Fatma BaAlawi, Hamda AL Barwani, Zeyana Al-Dahmani, Inisar Al-Shukri, Aisha Al-Busaidi, Aisha Al-Amri, Aham Al-Amri, Mohammed Al-Tobi, Samiha Al Kharusi, Abdulla Balkhair                                                                                                                                                                                            |
| EPI_ISL_492035                                                                                 | Instituto de Biología do Exércio                                                                                                                                                    | Laboratório Metabolismo Macromolecular Firmino Torres de Castro, Instituto de Biólógica Carlos Chagas Filho, Universidade Federal do Rio de Janeiro   | Bianca Catarina Azevedo Cabral, Aline Rosa Vianna de Souza, Taliana LS Nogueira, Nádia Vaez Gonçalves da Cruz, Caleb GM Santos, Marcos Dornelas-Ribeiro, Elizabeth Valentin, Marcio da Costa Ciprielli, Virginia Sara Granieri do Amaral, Rodrigo Soares de Moura Neto, Clarissa Damaso, Rosane Silva                                                                                                                                                        |
| EPI_ISL_492036                                                                                 | Instituto de Biología do Exércio                                                                                                                                                    | Laboratório Metabolismo Macromolecular Firmino Torres de Castro, Instituto de Biólógica Carlos Chagas Filho, Universidade Federal do Rio de Janeiro   | Bianca Catarina Azevedo Cabral, Aline Rosa Vianna de Souza, Marcos Dornelas-Ribeiro, Tatiana LS Nogueira, Nádia Vaez Gonçalves da Cruz, Caleb GM Santos, Elizabeth Valentin, Marcio da Costa Ciprielli, Virginia Sara Granieri do Amaral, Rodrigo Soares de Moura Neto, Clarissa Damaso, Rosane Silva                                                                                                                                                        |
| EPI_ISL_492043                                                                                 | Instituto de Biología do Exércio                                                                                                                                                    | Laboratório Metabolismo Macromolecular Firmino Torres de Castro, Instituto de Biólógica Carlos Chagas Filho, Universidade Federal do Rio de Janeiro   | Bianca Catarina Azevedo Cabral, Aline Rosa Vianna de Souza, Caleb GM Santos, Marcos Dornelas-Ribeiro, Tatiana LS Nogueira, Nádia Vaez Gonçalves da Cruz, Caleb GM Santos, Elizabeth Valentin, Marcio da Costa Ciprielli, Virginia Sara Granieri do Amaral, Rodrigo Soares de Moura Neto, Clarissa Damaso, Rosane Silva                                                                                                                                       |
| EPI_ISL_492044                                                                                 | Instituto de Biología do Exércio                                                                                                                                                    | Laboratório Metabolismo Macromolecular Firmino Torres de Castro, Instituto de Biólógica Carlos Chagas Filho, Universidade Federal do Rio de Janeiro   | Bianca Catarina Azevedo Cabral, Aline Rosa Vianna de Souza, Marcos Dornelas-Ribeiro, Tatiana LS Nogueira, Nádia Vaez Gonçalves da Cruz, Caleb GM Santos, Elizabeth Valentin, Marcio da Costa Ciprielli, Virginia Sara Granieri do Amaral, Rodrigo Soares de Moura Neto, Clarissa Damaso, Rosane Silva                                                                                                                                                        |
| EPI_ISL_492045                                                                                 | Instituto de Biología do Exércio                                                                                                                                                    | Laboratório Metabolismo Macromolecular Firmino Torres de Castro, Instituto de Biólógica Carlos Chagas Filho, Universidade Federal do Rio de Janeiro   | Bianca Catarina Azevedo Cabral, Aline Rosa Vianna de Souza, Caleb GM Santos, Marcos Dornelas-Ribeiro, Tatiana LS Nogueira, Nádia Vaez Gonçalves da Cruz, Caleb GM Santos, Elizabeth Valentin, Marcio da Costa Ciprielli, Virginia Sara Granieri do Amaral, Rodrigo Soares de Moura Neto, Clarissa Damaso, Rosane Silva                                                                                                                                       |
| EPI_ISL_492046                                                                                 | Instituto de Biología do Exércio                                                                                                                                                    | Laboratório Metabolismo Macromolecular Firmino Torres de Castro, Instituto de Biólógica Carlos Chagas Filho, Universidade Federal do Rio de Janeiro   | Bianca Catarina Azevedo Cabral, Aline Rosa Vianna de Souza, Caleb GM Santos, Marcos Dornelas-Ribeiro, Tatiana LS Nogueira, Nádia Vaez Gonçalves da Cruz, Caleb GM Santos, Elizabeth Valentin, Marcio da Costa Ciprielli, Virginia Sara Granieri do Amaral, Rodrigo Soares de Moura Neto, Clarissa Damaso, Rosane Silva                                                                                                                                       |
| EPI_ISL_492047                                                                                 | Instituto de Biología do Exércio                                                                                                                                                    | Laboratório Metabolismo Macromolecular Firmino Torres de Castro, Instituto de Biólógica Carlos Chagas Filho, Universidade Federal do Rio de Janeiro   | Bianca Catarina Azevedo Cabral, Aline Rosa Vianna de Souza, Caleb GM Santos, Marcos Dornelas-Ribeiro, Tatiana LS Nogueira, Nádia Vaez Gonçalves da Cruz, Caleb GM Santos, Elizabeth Valentin, Marcio da Costa Ciprielli, Virginia Sara Granieri do Amaral, Rodrigo Soares de Moura Neto, Clarissa Damaso, Rosane Silva                                                                                                                                       |
| EPI_ISL_492048                                                                                 | Instituto de Biología do Exércio                                                                                                                                                    | Laboratório Metabolismo Macromolecular Firmino Torres de Castro, Instituto de Biólógica Carlos Chagas Filho, Universidade Federal do Rio de Janeiro   | Bianca Catarina Azevedo Cabral, Aline Rosa Vianna de Souza, Marcos Dornelas-Ribeiro, Tatiana LS Nogueira, Nádia Vaez Gonçalves da Cruz, Caleb GM Santos, Elizabeth Valentin, Marcio da Costa Ciprielli, Virginia Sara Granieri do Amaral, Rodrigo Soares de Moura Neto, Clarissa Damaso, Rosane Silva                                                                                                                                                        |
| EPI_ISL_492065                                                                                 | Oman-National Influenza Center                                                                                                                                                      | Department of Microbiology and Immunology, SCUJH Department of Microbiology and Immunology, Sultan Cabos University Hospital, P.O 35, Postal code 123 | Samira Al-Mharqi, Fahad Zaidat, Amina Al-Jardani, Khaloud Al-Memmary, Hanan Al-Khrdli, Fatma BaAlawi, Hamda AL Barwani, Zeyana Al-Dahmani, Inisar Al-Shukri, Azza Al-Rasidi, Samiha Al Kharusi, Abdulla Balkhair                                                                                                                                                                                                                                             |
| EPI_ISL_492076                                                                                 | Institute for Public Health of the Republic of North Macedonia                                                                                                                      | Charlie Universitátsmedizin Berlin, Institute of Virology                                                                                             | Victor M Cormann, Joern Behem-Schwarzbach, Barbara Wuhlmann, Talitha Veith, Julia Schneider, Elizabeth Jancheská, Maja Kuzmanovska, Goldjanka Bosevska, Terry Jones, Christian Drosien                                                                                                                                                                                                                                                                       |
| EPI_ISL_492388                                                                                 | Centri laboratoria                                                                                                                                                                  | Latvian Biomedical Research and Study Centre                                                                                                          | Ivars Silamelijs, Kaspars Meginis, Morna Ustinova, Ika Ziedins, Viia Rote, Stelija Lappa, Jana Ose, Maria Piedite, Uga Dumpis, Jnis Klouš                                                                                                                                                                                                                                                                                                                    |
| EPI_ISL_493352                                                                                 | Oso University Hospital, Department of Medical Microbiology                                                                                                                         | Norwegian Institute of Public Health, Department of Virology                                                                                          | Kathrine Stene-Johansen, Kamilla Heddeler Instefjord, Hilde Eshaug, Rasmus Flis Kopperud, Karoline Bragstad, Olav Hungnes                                                                                                                                                                                                                                                                                                                                    |
| EPI_ISL_493372                                                                                 | Furst Medical Laboratory                                                                                                                                                            | Norwegian Institute of Public Health, Department of Virology                                                                                          | Kathrine Stene-Johansen, Kamilla Heddeler Instefjord, Hilde Eshaug, Rasmus Flis Kopperud, Karoline Bragstad, Olav Hungnes                                                                                                                                                                                                                                                                                                                                    |
| EPI_ISL_493684, EPI_ISL_493696                                                                 | Virology Department, Sheffield Teaching Hospitals NHS Foundation, TrustID department of Infection, Immunity and Cardiovascular Disease, The Medical School, University of Sheffield | COVID-19 Genomics UK (COG-UK) Consortium                                                                                                              | Thushan de Silva, Matthew Parker, Nikki Smith, Adri Angyal, Rebecca Brown, Luke Green, Rachel Tucker, Paul Parsons, Danielle Groves, Katie Johnson, Laura Carriero, Alex Keesley, Dave Partridge, Matthew Wyles, Benjamin Lindsey, Mehmet Yavuz, Mohammad Raza, Calad Evans                                                                                                                                                                                  |
| EPI_ISL_495420, EPI_ISL_495434, EPI_ISL_495436, EPI_ISL_495445, EPI_ISL_495450, EPI_ISL_495455 | Katkas University, Faculty of Medicine, Department of Medical Microbiology                                                                                                          | Katkas University, Faculty of Medicine, Department of Medical Microbiology                                                                            | Ghandhari J, Pillay S, Lessells R, Chimuqangara B, Mallose K, York D, Khan S, Tegally H, Wilkinson E, de Oliveira T                                                                                                                                                                                                                                                                                                                                          |
| EPI_ISL_495559                                                                                 | NHL-S-ALCH                                                                                                                                                                          | KRIISP , KZN Research Innovation and Sequencing Platform                                                                                              | Murat Karamese, Didem Ozgur , E. Ediz Tutuncu                                                                                                                                                                                                                                                                                                                                                                                                                |
| EPI_ISL_495634, EPI_ISL_496492                                                                 | Viral Respiratory Lab, National Institute for Biomedical Research (INRB)                                                                                                            | Pathogen Sequencing Lab, National Institute for Biomedical Research (INRB)                                                                            | Placide Wbaala Kingebeni, Edin Nkwemba, Eddy Kinganda-Lusamaki, Amur Azza, Francisca Mvumbwe Mawele, Emmanuel Lokito Lofko, Catherine Prati, Mathias Paulmer, Josh Quirk, Alison Black, James Hadfield, Tevor Redford, Ian Goodellow, Andrew Ramchar, Nick Loman, Kristian Andersen, Michael Wiley, Steve Atukamuunda, Jean-Jacques Muyembe Tshumy                                                                                                           |
| EPI_ISL_497286                                                                                 | Washington State Department of Health                                                                                                                                               | Seattle Flu Study                                                                                                                                     | Deborah A Nickerson, Chris D. Frazier, Louer Lee, Benjamin Palla, Matthew Richardson, Amanda Adler, Elisabeth Bandstetter, Peter D. Han, Karsten Fay, Misja Ijssin, Kirsten Lacombe, Thomas R. Shiley, Melissa Truong, Caitlin R. Wolf, Ramesh Gadbup, Geoff Mally, Brian Hatt, Philip Dykstra, Scott Lindquist, Michael Boeckl, Janet A. Erigund, Michael Ramulare, Barry R. Lutz, Mark W. Fleiter, Lea W., Stantia, Matthew Thompson, Helen T., Chu, Jay   |

|                                                                                |                                                                                                                                                                                                                              |                                                                                                                                      |                                                                                                                                                                                                                                                                                                                                                                                                                   |
|--------------------------------------------------------------------------------|------------------------------------------------------------------------------------------------------------------------------------------------------------------------------------------------------------------------------|--------------------------------------------------------------------------------------------------------------------------------------|-------------------------------------------------------------------------------------------------------------------------------------------------------------------------------------------------------------------------------------------------------------------------------------------------------------------------------------------------------------------------------------------------------------------|
| EPI_ISL_497770, EPI_ISL_497809                                                 | Department of Microbiology, The University of Hong Kong                                                                                                                                                                      | Department of Microbiology, The University of Hong Kong                                                                              | Shendure, Trevor Bedford                                                                                                                                                                                                                                                                                                                                                                                          |
| EPI_ISL_497950                                                                 | Shaoxing CDC                                                                                                                                                                                                                 | Zhejiang Provincial Center for Disease Control and Prevention                                                                        | Kevin K.W. To, Kwok-Yung Yuen                                                                                                                                                                                                                                                                                                                                                                                     |
| EPI_ISL_499084                                                                 | NHLS-SALCH                                                                                                                                                                                                                   | KRISiP, KZN Research Innovation and Sequencing Platform                                                                              | Yin Chen, Yanjun Zhang, Haiyan Mao, Junhang Pan, Xuyi Lou, Yi Sun, Hao Yan, Zhen Li, Wen Shi                                                                                                                                                                                                                                                                                                                      |
| EPI_ISL_498141, EPI_ISL_498150                                                 | Department of Clinical Microbiology                                                                                                                                                                                          | GIGA Medical Genomics                                                                                                                | Grandjean J, Pillay S, Lesseles R, Chimukangara B, Malalose K, York D, Khan S, Tegally H, Wilkinson E, de Oliveira T                                                                                                                                                                                                                                                                                              |
| EPI_ISL_498238                                                                 | Institut Pasteur de Dakar                                                                                                                                                                                                    | Institut Pasteur de Dakar                                                                                                            | Ndongo Dia, Moussa Moïse Diagne, Mamadou Diop, Marie Hermiette Dior Ndione, Mamadou Malédo Jallow, Safiatou Sankhe Mbenque, Ousmane Faye, Hayette, Vincent Bours.                                                                                                                                                                                                                                                 |
| EPI_ISL_498270, EPI_ISL_498271                                                 | Department of Microbiology, The University of Hong Kong                                                                                                                                                                      | Department of Microbiology, The University of Hong Kong                                                                              | Kevin K.W. To, Kwok-Yung Yuen                                                                                                                                                                                                                                                                                                                                                                                     |
| EPI_ISL_498417                                                                 | National Institute of Laboratory Medicine and Referral Center                                                                                                                                                                | Genomic Research Lab, BCSiR                                                                                                          | Tasnim Nafisa, Abu Sayeed Mohammad Mahmud, Mohammad Samir Uzzaman, Esrar Osman, Md. Anas Habib, Shahina Akter, Tanjina Akhter Banu, Md. Musned Hasan Sarkar, Barua Goswami, Ifrat Jahari, Md. Saddam Hossain, Md. Masud Ahmed Molla, Mahmuda Yasmin, Ashi Kumar Ghosh, A. K. M. Shamsuzzaman, Sheikh Md. Selim Al Din, Utpal Chandra Ray, Saikat Ahmed Sajil, Md. Selim Khan                                      |
| EPI_ISL_498563                                                                 | Laboratory of Molecular Virology, International Center for Genetic Engineering and Biotechnology (ICGEB)                                                                                                                     | ARGO Open Lab Platform for Genome Sequencing                                                                                         | Leastro D, Rajasekharan S, Dal Moreno S, Segal L, D'Agaro P, Marcello A                                                                                                                                                                                                                                                                                                                                           |
| EPI_ISL_498613                                                                 | National Public Health Laboratory, National Centre for Infectious Diseases                                                                                                                                                   | National Public Health Laboratory, National Centre for Infectious Diseases                                                           | Mak TM, Octavia S, Zhou Z, Chevatte JM, Cui L, Lin RTP                                                                                                                                                                                                                                                                                                                                                            |
| EPI_ISL_498628                                                                 | Department of Clinical Microbiology                                                                                                                                                                                          | GIGA Medical Genomics                                                                                                                | Keih Durkin, Maria Aresi, Sébastien Bortems, Raphaël Boreux, Cécilia Meek, Axelle Chastain, Céline Fombellida-Lopez, Perrrette Mehn, Marie-Pierre Hayette, Vincent Bours.                                                                                                                                                                                                                                         |
| EPI_ISL_498691                                                                 | National Institute for Viral Disease Control and Prevention, China CDC                                                                                                                                                       | National Institute for Viral Disease Control and Prevention, China CDC                                                               | Xiang Zhaoli, Lingling Mao, Yao Meng, Zhixiao Chen, Yuchao Wu, Yong Zhangbo, Zhihanlanqun Zhang, Yang Song, Dayan Wang, WenQing Yao, Wenbo Xu                                                                                                                                                                                                                                                                     |
| EPI_ISL_499386                                                                 | Originating lab: Wales Specialist Virology Centre Sequencing lab: Pathogen Genomics Unit                                                                                                                                     | COVID-19 Genomics UK (COG-UK) Consortium                                                                                             | Catherine Moore, Johnathan Evans, Laura Gifford, Malorie Perry, Simon Cottrell, Angela Marchbank, Alec Birchley, Alexander Adams, Amy Gasikin, Bree Gatica-Wilcox, Jason Coombes, Joel Southgate, Lauren Gilbert, Lee Graham, Nicole Frachantini, Sara Kurtzienne-Sumnerhayes, Sarah Taylor, Sophie Jones, Sara Ray, Matthew Bull, Joanne Watkins, Sally Corder, Tom Connor                                       |
| EPI_ISL_500572                                                                 | Singapore General Hospital                                                                                                                                                                                                   | Department of Microbiology                                                                                                           | Nurdyana Abdul Rahman, Kun Lee Lim, Chenhao Li, Kian Sing Chan, Lynette Oon, Kern Rai Chng, Niranjani Nagarajan, Karrie Ko                                                                                                                                                                                                                                                                                        |
| EPI_ISL_500573, EPI_ISL_500580                                                 | National Virus Reference Laboratory                                                                                                                                                                                          | National Virus Reference Laboratory                                                                                                  | Michael Carr, Gabriel Gonzalez, Jonathan Dean, Suzie Coughlan, Cillian F De Gascon                                                                                                                                                                                                                                                                                                                                |
| EPI_ISL_500786                                                                 | Furst Medical Laboratory                                                                                                                                                                                                     | Norwegian Institute of Public Health, Department of Virology                                                                         | Kathrine Stone-Johansen, Kamilla Heddeland Instefjord, Hilde Eishaug, Rasmus Riis Kopperud, Karoline Bragstad, Olav Hungnes                                                                                                                                                                                                                                                                                       |
| EPI_ISL_500797                                                                 | Hospital of Southern Norway - Kristiansand, Department of Medical Microbiology                                                                                                                                               | Norwegian Institute of Public Health, Department of Virology                                                                         | Kathrine Stone-Johansen, Kamilla Heddeland Instefjord, Hilde Eishaug, Rasmus Riis Kopperud, Karoline Bragstad, Olav Hungnes                                                                                                                                                                                                                                                                                       |
| EPI_ISL_500933                                                                 | Violier AG                                                                                                                                                                                                                   | Department of Biosystems Science and Engineering, ETH Zurich                                                                         | Kathrine Stone-Johansen, Kamilla Heddeland Instefjord, Hilde Eishaug, Rasmus Riis Kopperud, Karoline Bragstad, Olav Hungnes                                                                                                                                                                                                                                                                                       |
| EPI_ISL_501029, EPI_ISL_501036, EPI_ISL_501071                                 | Regional Virus Laboratory, Belfast Health and Social Care Trust                                                                                                                                                              | Wellcome Sanger Institute for the COVID-19 Genomics UK (COG-UK) consortium                                                           | Christian Basel, Sarah Nadeau, Ivan Topolsky, Pedro Ferreira, Philipp Jablonski, Susana Posada, Césgedés, Tobias Sätzl, Iva Nissen, Natacha Santhoro, Etienne Burchen, Christiane Beckmann, Maurice Beemer, Olivier Kober, Orhanon Koppin, Sophie Seriel, Noemie Sarhanahia de Souza, Nho Beerwinkel, Tanja Stadler                                                                                               |
| EPI_ISL_501087                                                                 | University of Washington Virology Lab                                                                                                                                                                                        | University of Washington Virology Lab                                                                                                | Conall McCaughey, James McKenna, Tanya Curran, Susan Feeney, Alison Watt, Ciara Cox, Mairead Connor, Zoltan Molnar, David Simpson, Derek Farley, and Alex Alderton, Roberto Arano, Sonia Gonçalves, Ewan Harrison, David K. Jackson, Ian Johnson, Dominic Kwiatkowski, Cordelle Langford, John Sillibe on behalf of the Wellcome Sanger Institute COVID-19 Surveillance Team (http://www.sanger.ac.uk/covid-team) |
| EPI_ISL_501233, EPI_ISL_501236                                                 | Hellenic Pasteur Institute, National Influenza Reference Laboratory of Southern Greece & Unit of Bioinformatics and Applied Genomics                                                                                         | Hellenic Pasteur Institute, National Influenza Reference Laboratory of Southern Greece & Unit of Bioinformatics and Applied Genomics | Pavla Rouchoudury, Hong Xia, Lasata Shrestha, Amin Addetta, Trong Nguyen, Victoria M Fachieff, Mee-Il Huang, Keith R Jerome, Alexander Grantinger                                                                                                                                                                                                                                                                 |
| EPI_ISL_501259, EPI_ISL_501273, EPI_ISL_501274                                 | National Virus Reference Laboratory                                                                                                                                                                                          | National Virus Reference Laboratory                                                                                                  | Vasiliki Poyka, Timokratis Karanitos, Athanasios Kossovakis, Antonios Kalliropoulos, Hoeriti Eira, Evangelidou Maria, Androniki Youlgar-Kokota, Aspasia Krontou, Andreas Meritis                                                                                                                                                                                                                                  |
| EPI_ISL_501286, EPI_ISL_501808                                                 | Centri laboratorija E. Gulpa laboratorija                                                                                                                                                                                    | Latvian Biomedical Research and Study Centre                                                                                         | Michael Carr, Gabriel Gonzalez, Jonathan Dean, Suzie Coughlan, Cillian F De Gascon                                                                                                                                                                                                                                                                                                                                |
| EPI_ISL_501894                                                                 | Centri laboratorija                                                                                                                                                                                                          | Latvian Biomedical Research and Study Centre                                                                                         | Ivars Sliemelis, Kaspars Magnis, Monta Ustinova, Iklia Zielovs, Vita Rove, Stelie Lapa, Jana Osa, Maria Priede, Uga Dumpis, Jins Klovš                                                                                                                                                                                                                                                                            |
| EPI_ISL_501895, EPI_ISL_501896                                                 | LACEN/PE                                                                                                                                                                                                                     | LACEN/PE                                                                                                                             | Ivars Sliemelis, Kaspars Magnis, Monta Ustinova, Iklia Zielovs, Vita Rove, Stelie Lapa, Jana Osa, Maria Priede, Uga Dumpis, Jins Klovš                                                                                                                                                                                                                                                                            |
| EPI_ISL_502875                                                                 | LACEN/PE                                                                                                                                                                                                                     | LACEN/PE                                                                                                                             | Ivars Sliemelis, Kaspars Magnis, Monta Ustinova, Iklia Zielovs, Vita Rove, Stelie Lapa, Jana Osa, Maria Priede, Uga Dumpis, Jins Klovš                                                                                                                                                                                                                                                                            |
| EPI_ISL_504180                                                                 | National Institute of Laboratory Medicine and Referral Center                                                                                                                                                                | Genomic Research Lab, BCSiR                                                                                                          | WILSON JOSE DA SILVA JUNIOR, HEIDI LACERDA ALVES DA CRUZ, MARCOS DA SILVEIRA REGUEIRA NETO, BRUNO SAMPAIO, SERGIO DE SA LETTAO PAIVA JUNIOR, ZILDENE DE SOUSA SILVEIRA, MARA GALDINO DA ROCHA, PITTA MICHELLE Y CRISTINY PEREIRA, REGINALDO GONCALVES DE LIMA NETO, MARCOS ANTONIO DE MORAIS JUNIOR, ANTONIO CARLOS DE FREITAS, VALDIR DE QUEIROZ BALBINO.                                                        |
| EPI_ISL_507233, EPI_ISL_507252                                                 | WHO National Influenza Centre Russian Federation                                                                                                                                                                             | WHO National Influenza Centre Russian Federation                                                                                     | WILSON JOSE DA SILVA JUNIOR, HEIDI LACERDA ALVES DA CRUZ, MARCOS DA SILVEIRA REGUEIRA NETO, BRUNO SAMPAIO, SERGIO DE SA LETTAO PAIVA JUNIOR, ZILDENE DE SOUSA SILVEIRA, MARA GALDINO DA ROCHA, PITTA MICHELLE Y CRISTINY PEREIRA, REGINALDO GONCALVES DE LIMA NETO, MARCOS ANTONIO DE MORAIS JUNIOR, ANTONIO CARLOS DE FREITAS, VALDIR DE QUEIROZ BALBINO.                                                        |
| EPI_ISL_508290                                                                 | Indian Institute of Science                                                                                                                                                                                                  | National Institute of Biomedical Genomics                                                                                            | Abu Sayeed Mohammad Mahmud, Mohammad Samir Uzzaman, Esrar Osman, Md. Anas Habib, Shahina Akter, Tanjina Akhter Banu, Md. Musned Hasan Sarkar, Barua Goswami, Ifrat Jahari, Md. Saddam Hossain, Taranum Taznin, Tasnim Nafisa Md. Masud Ahmed Molla, Mahmuda Yasmin, Ashi Kumar Ghosh, A. K. M. Shamsuzzaman, Sheikh Md. Selim Al Din, Utpal Chandra Ray, Saikat Ahmed Sajil, Md. Selim Khan                       |
| EPI_ISL_508451, EPI_ISL_508453                                                 | ICMR-National Institute of Cholera and Enteric Diseases                                                                                                                                                                      | National Institute of Biomedical Genomics                                                                                            | Arindam Maitra, Barathi K Sundararaj, Harsha Rajhela, N. Srinivasan, Deepak K Saini, Amr Singh, Saumitra Das                                                                                                                                                                                                                                                                                                      |
| EPI_ISL_508496                                                                 | Translational Health Science and Technology Institute                                                                                                                                                                        | National Institute of Biomedical Genomics                                                                                            | Arindam Maitra, Manma Chawla Sarkar, Sreedhar Chinnaswamy, Hasina Banu, Aranya Chatterjee, Shantia Dutta, Saumitra Das                                                                                                                                                                                                                                                                                            |
| EPI_ISL_509430, EPI_ISL_509431, EPI_ISL_509432, EPI_ISL_509433, EPI_ISL_509435 | Centro de Desenvolvimento Tecnológico em Saúde, Fundacao Oswaldo Cruz                                                                                                                                                        | Centro de Desenvolvimento Tecnológico em Saúde, Fundacao Oswaldo Cruz                                                                | Arindam Maitra, Guruprasad Madgeshi, Shiranabhasva Palli, Anbalagan Ananthraj, Madhu Pareek, Irran Khan, Gagandeep Kang, Samritra Das                                                                                                                                                                                                                                                                             |
| EPI_ISL_509634, EPI_ISL_509641                                                 | Serviço de Microbiologia, Hospital Universitário Dorostia, OSI, Microbiologia, Área de Enteromedidas Intecosias, Grupo de Infecção Respiratória, Resistência Antimicrobiana, Instituto de Investigação Sanitária Biodorostia | SeqCOVID-SPiM consortium (IBV/OSIC)                                                                                                  | Souza T.M., Fintelman-Rodrigues N., De Paula A.D., Saraiva F.B., Ferreira M.A., Sacramento C.O., Medeiros M.A.                                                                                                                                                                                                                                                                                                    |
| EPI_ISL_509804, EPI_ISL_509807                                                 | University of Wisconsin-Madison AIDS Vaccine Research Laboratories                                                                                                                                                           | University of Wisconsin-Madison AIDS Vaccine Research Laboratories                                                                   | Gustavo Cilia, Milagrosa Moraes, Luis Prieto, Jose Maria Marinon and SeqCOVID-SPAN consortium                                                                                                                                                                                                                                                                                                                     |
|                                                                                |                                                                                                                                                                                                                              |                                                                                                                                      | Gage Moreno, Katanna Braun, et al. AIDS Vaccine Research Laboratories                                                                                                                                                                                                                                                                                                                                             |

|                |                |                                                                                                                                                                                                                                |                                                                                                                                                                                                                                       |                                                                                                                                                                                                                                                                                                                          |
|----------------|----------------|--------------------------------------------------------------------------------------------------------------------------------------------------------------------------------------------------------------------------------|---------------------------------------------------------------------------------------------------------------------------------------------------------------------------------------------------------------------------------------|--------------------------------------------------------------------------------------------------------------------------------------------------------------------------------------------------------------------------------------------------------------------------------------------------------------------------|
| EPI_ISL_510448 | EPI_ISL_510450 | Hospital Universitario Virgen de las Nieves de Granada-SAS                                                                                                                                                                     | SeqCOVID-SPAIN consortium/IBV(CSIC)                                                                                                                                                                                                   | Mercedes Pérez Ruiz, Sara Santomatsu Gámez, Irene Pedrosa Corral, José M. Navarro-Marrí and SeqCOVID-SPAIN consortium                                                                                                                                                                                                    |
| EPI_ISL_510523 |                | Servicio de Microbiología, Laboratorio Clínico Metropolitano Nord, Hospital Universitari Germans Trias i Pujol, Institut d'Investigació en Ciències de la Salut Germans Trias i Pujol (IGTP)                                   | SeqCOVID-SPAIN consortium/IBV(CSIC)                                                                                                                                                                                                   | Elisa Marró, Antoni E. Bordy, Anna Not, Adrián Antóni, Anabel Fernández, Nora Romani and SeqCOVID-SPAIN consortium                                                                                                                                                                                                       |
| EPI_ISL_510526 | EPI_ISL_510535 | Biological prevention, army<br>Molecular Virology, Instituto Carlos Chagas / Focuz<br>Paraná                                                                                                                                   | Biological prevention, army<br>Universidade Federal do Paraná (UFPR)                                                                                                                                                                  | Seadaw, M.G., Shamel, M.D., Henry, B.S., Ehsosy, M.M. and Gad, A.F.<br>Suzukawa, A., Tschä, M., Zanluca, C., Radoni, S., Duarte dos Santos, C.                                                                                                                                                                           |
| EPI_ISL_510536 | EPI_ISL_510541 | Centro de Desenvolvimento Tecnológico em Saúde, Fundacao Oswaldo Cruz<br>Centro de Desenvolvimento Tecnológico em Saúde, Fundacao Oswaldo Cruz                                                                                 | Centro de Desenvolvimento Tecnológico em Saúde, Fundacao Oswaldo Cruz<br>Centro de Desenvolvimento Tecnológico em Saúde, Fundacao Oswaldo Cruz                                                                                        | Souza, T.M., Fritelman-Rodrigues, N., De Paula, A.D., Saraiva, F. B., Ferreira, M.A., Sacramento, C.O. and Medeiros, M.A.                                                                                                                                                                                                |
| EPI_ISL_510549 | EPI_ISL_510582 | Division of Infectious Diseases, Korea Centers for Diseases Control and Prevention<br>Vollier AG                                                                                                                               | Division of Infectious Diseases, Korea Centers for Diseases Control and Prevention<br>ETH Zürich                                                                                                                                      | Jeong-Min Kim, Yoon-Seok Chung, Nangjo Lee, Sang Hee Woo, Hye-Jun Jo, Heui Man Kim, Jun-Soo Kim, Myung Guk Han                                                                                                                                                                                                           |
| EPI_ISL_510738 | EPI_ISL_510787 | NA<br>Klinisk mikrobiologi centralsjukhuset Karlstad                                                                                                                                                                           | Department of Biosystems Science and Engineering, ETH Zürich<br>The Public Health Agency of Sweden                                                                                                                                    | Christian Beisel, Sarah Nadeau, Ivan Topolsky, Pedro Ferreira, Philipp Jablonski, Susana Posada-Céspedes, Tobias Schär, Ina Nissen, Natascia Santoroce, Elodie Burcken, Christiane Beckmann, Maurice Redondo, Olivier Kobi, Christoph Noppen, Sophie Seidel, Noemie Santamaria de Souza, Nho Beerenwinkel, Tanja Stadler |
| EPI_ISL_510812 | EPI_ISL_510820 | NA<br>Utläts Eskilstuna                                                                                                                                                                                                        | The Public Health Agency of Sweden<br>The Public Health Agency of Sweden                                                                                                                                                              | Oskar Karlsson Lindjö, Maria Lind Karberg, Mattias Haukland, Feza Adani, Olov Svarstom, Anna-Malin Linde, Sandra Brodesson, Petra Edquist, Mia Bryting, Anna Risberg, Karin Tegmark-Wisell                                                                                                                               |
| EPI_ISL_510827 | EPI_ISL_510852 | Karolinska Universitetslaboratoriet<br>Instituto Nacional de Saude (INSA)                                                                                                                                                      | The Public Health Agency of Sweden<br>The Public Health Agency of Sweden                                                                                                                                                              | Oskar Karlsson Lindjö, Marie Lind Karberg, Mattias Haukland, Feza Adani, Olov Svarstom, Anna-Malin Linde, Sandra Brodesson, Petra Edquist, Mia Bryting, Anna Risberg, Karin Tegmark-Wisell<br>Borges et al                                                                                                               |
| EPI_ISL_510890 | EPI_ISL_511030 | Laboratorium Kesehatan Provinsi Jawa Barat<br>Vollier AG                                                                                                                                                                       | Medicine-Universitas Padjadjaran, School of Life Sciences and Technology, & School of Pharmacy-Institut Teknologi Bandung, Laboratorium Kesehatan Provinsi Jawa Barat<br>Department of Biosystems Science and Engineering, ETH Zürich | Marselina Irawanita Tan, Yunita Sribudiani, Gurur Riari, Azzania Fibiati, Husna Nugrahanjara, Tarnedi, Ema Rahmawati, Hesli Lina Witaswati, Lia Faridah Savira Ekawandhani, Ryan Bayusantika Ristandi, Riky Waiyugati Rachman, Ciri Nur Cynthia Almanda, Harman Riza, Soni Solisita Wisawan, Agung Eru Wibowo            |
| EPI_ISL_512298 | EPI_ISL_512300 | Hematology Laboratory, Section of Molecular Diagnostics, University Clinical Centre, Medical University of Gdansk<br>West of Scotland Specialist Virology Centre, NHSGGC / MRC-University of Glasgow Centre for Virus Research | Department of Virology, Faculty of Medicine, University of Helsinki, Helsinki, Finland<br>COVID-19 Genomics UK (COG-UK) Consortium                                                                                                    | Christian Beisel, Sarah Nadeau, Ivan Topolsky, Pedro Ferreira, Philipp Jablonski, Susana Posada-Céspedes, Tobias Schär, Ina Nissen, Natascia Santoroce, Elodie Burcken, Christiane Beckmann, Maurice Redondo, Olivier Kobi, Christoph Noppen, Sophie Seidel, Noemie Santamaria de Souza, Nho Beerenwinkel, Tanja Stadler |
| EPI_ISL_512467 | EPI_ISL_512511 | Wales Specialist Virology Centre Sequencing lab: Pathogen Genomics Unit<br>National Laboratory for Influenza/Virology reference laboratory, Public Health Center of the Ministry of Health of Ukraine                          | COVID-19 Genomics UK (COG-UK) Consortium<br>Respiratory Virus Unit, Microbiology Services Colindale, Public Health England                                                                                                            | Madeji Grzybek, Mariena Robakowska, Aneta Szulc, Ewa Mlonez, Olii Vapalahti, Teemu Sntura                                                                                                                                                                                                                                |
| EPI_ISL_512569 | EPI_ISL_512663 | Latvijas Infektoloģijas centrs<br>Area De Salud Fortuna                                                                                                                                                                        | Latvian Biomedical Research and Study Centre<br>Inciensa, Instituto Costarricense de Investigación y Enseñanza en Nutrición y Salud                                                                                                   | Ivars Stalmieļs, Kaspars Megnis, Morna Ustinova, Iklia Zelovs, Vija Rove, Jeena Storoženko, Tatjana Kolupajeva, Oksana Savicka, Uga Dumpis, Jins Klovis                                                                                                                                                                  |
| EPI_ISL_512671 | EPI_ISL_512810 | Area De Salud La Cruz<br>National Laboratory for Influenza/Virology reference laboratory, Public Health Center of the Ministry of Health of Ukraine                                                                            | Inciensa, Instituto Costarricense de Investigación y Enseñanza en Nutrición y Salud<br>Respiratory Virus Unit, Microbiology Services Colindale, Public Health England                                                                 | Francisco Duarte, Hebleen Porras, Claudio Sobr-Garita, Estela Cordero, Adriana Godínez & Melany Calderon                                                                                                                                                                                                                 |
| EPI_ISL_512842 | EPI_ISL_512921 | National Public Health Laboratory, National Centre for Infectious Diseases<br>Pathogen Genomics Lab King Abdullah University of Science and Technology(KAUST)                                                                  | National Public Health Laboratory, National Centre for Infectious Diseases<br>Pathogen Genomics Lab King Abdullah University of Science and Technology(KAUST)                                                                         | Francisco Duarte, Hebleen Porras, Claudio Sobr-Garita, Estela Cordero, Adriana Godínez & Melany Calderon                                                                                                                                                                                                                 |
| EPI_ISL_512990 | EPI_ISL_512991 | Pathogen Genomics Lab King Abdullah University of Science and Technology(KAUST)<br>Pathogen Genomics Lab King Abdullah University of Science and Technology(KAUST)                                                             | Pathogen Genomics Lab King Abdullah University of Science and Technology(KAUST)<br>Pathogen Genomics Lab King Abdullah University of Science and Technology(KAUST)                                                                    | Mak, T.M., Octavia S., Zhou Z, Chavatte JM, Cui L, Lin RTP                                                                                                                                                                                                                                                               |
| EPI_ISL_513002 | EPI_ISL_513003 | Pathogen Genomics Lab King Abdullah University of Science and Technology(KAUST)<br>Pathogen Genomics Lab King Abdullah University of Science and Technology(KAUST)                                                             | Pathogen Genomics Lab King Abdullah University of Science and Technology(KAUST)<br>Pathogen Genomics Lab King Abdullah University of Science and Technology(KAUST)                                                                    | Ahmad Bakur Mahmud, Amir Hashem, Naif Almontashiri, Anab Pain                                                                                                                                                                                                                                                            |
| EPI_ISL_513064 | EPI_ISL_513073 | Pathogen Genomics Lab King Abdullah University of Science and Technology(KAUST)<br>Pathogen Genomics Lab King Abdullah University of Science and Technology(KAUST)                                                             | Pathogen Genomics Lab King Abdullah University of Science and Technology(KAUST)<br>Pathogen Genomics Lab King Abdullah University of Science and Technology(KAUST)                                                                    | Ahmad Bakur Mahmud, Amir Hashem, Naif Almontashiri, Anab Pain                                                                                                                                                                                                                                                            |
| EPI_ISL_513115 |                | Pathogen Genomics Lab King Abdullah University of Science and Technology(KAUST)                                                                                                                                                | Pathogen Genomics Lab King Abdullah University of Science and Technology(KAUST)                                                                                                                                                       | Ahmad Bakur Mahmud, Amir Hashem, Naif Almontashiri, Anab Pain                                                                                                                                                                                                                                                            |

|                                                                                                                                                                                |                                                                                                                                                                             |                                                                                                                                                                                                                                                                                                                                                                                                                                                                |                                                                                                                                                                                                                                                                                                                                                                                                                                                                                                                                                                     |
|--------------------------------------------------------------------------------------------------------------------------------------------------------------------------------|-----------------------------------------------------------------------------------------------------------------------------------------------------------------------------|----------------------------------------------------------------------------------------------------------------------------------------------------------------------------------------------------------------------------------------------------------------------------------------------------------------------------------------------------------------------------------------------------------------------------------------------------------------|---------------------------------------------------------------------------------------------------------------------------------------------------------------------------------------------------------------------------------------------------------------------------------------------------------------------------------------------------------------------------------------------------------------------------------------------------------------------------------------------------------------------------------------------------------------------|
| EPI_ISL_513176                                                                                                                                                                 | Pathogen Genomics Lab King Abdullah University of Science and Technology(KAUST)                                                                                             | Pathogen Genomics Lab King Abdullah University of Science and Technology(KAUST)                                                                                                                                                                                                                                                                                                                                                                                | Anil Kumar Subudhi, Rahu P Salunke, Sara Mareri, Sharif Hala, Fadwa Alofi, Fathia Ben Rached, Ahrar Alsomali, Asim Khrogeer, Nashwa Alkhatani, Raeesa Naeem, Anwar Hashim, Naf Almotashiri, Anab Pain                                                                                                                                                                                                                                                                                                                                                               |
| EPI_ISL_513205                                                                                                                                                                 | Pathogen Genomics Lab King Abdullah University of Science and Technology(KAUST)                                                                                             | Pathogen Genomics Lab King Abdullah University of Science and Technology(KAUST)                                                                                                                                                                                                                                                                                                                                                                                | Rahu P Salunke, Sharif Hala, Raeesa Naeem, Sara Mareri, Anil Kumar Subudhi, Amanda Ooi, Luke Esau, Fadwa Alofi, Fathia Ben Rached, Ahrar Alsomali, Asim Khrogeer, Ahmad Bakur Mahmood, Anwar Hashim, Naf Almotashiri, Anab Pain                                                                                                                                                                                                                                                                                                                                     |
| EPI_ISL_513573, EPI_ISL_513574, EPI_ISL_513575, EPI_ISL_513576, EPI_ISL_513577, EPI_ISL_513578, EPI_ISL_513579, EPI_ISL_513580, EPI_ISL_513581, EPI_ISL_513582, EPI_ISL_513583 | Programa de Oncologia, Instituto Nacional de Cancer<br>Humboldt County Public Health Laboratory<br>Viral Respiratory Lab, National Institute for Biomedical Research (INRB) | Programa de Oncorriologia, Instituto Nacional de Cancer<br>Chan-Zuckerberg Biohub<br>Pathogen Sequencing Lab, National Institute for Biomedical Research (INRB)                                                                                                                                                                                                                                                                                                | Juliana D. Siqueira, Livia R. Goss, Burrina M. Alves, Claudia Ciccia, James Arthos, João P. B. Viola, Andreia C. de Melo, Marcelo A. Soares                                                                                                                                                                                                                                                                                                                                                                                                                         |
| EPI_ISL_513842                                                                                                                                                                 | Humboldt County Public Health Laboratory                                                                                                                                    | Chan-Zuckerberg Biohub                                                                                                                                                                                                                                                                                                                                                                                                                                         | CZB Olanub Consortium                                                                                                                                                                                                                                                                                                                                                                                                                                                                                                                                               |
| EPI_ISL_514119                                                                                                                                                                 | Viral Respiratory Lab, National Institute for Biomedical Research (INRB)                                                                                                    | Pathogen Sequencing Lab, National Institute for Biomedical Research (INRB)                                                                                                                                                                                                                                                                                                                                                                                     | Placide Mbale-Kingepeni, Edith Nkwemba, Eddy Kinganda-Iusanki, Anuri Aziza, Francisca Muvembe Mawere, Emmanuel Lokito Lokito, Catherine Pratt, Matthias Paulmer, Josh Ouk, Alison Black, James Hadfield, Trevor Bedford, Ian Goodfellow, Andrew Raimaud, Nick Loman, Kristian Andersen, Michael Wiley, Steve Ahuka-Mundehi, Jean-Jacques Muyembe Tshumu                                                                                                                                                                                                             |
| EPI_ISL_514131                                                                                                                                                                 | Rondonia Central Public Health Laboratory (LAOEN/RO), vinculated to State Health Secretariat of Rondonia (SESAU/RO)                                                         | Molecular Virology Laboratory of Oswaldo Cruz Foundation of Rondonia                                                                                                                                                                                                                                                                                                                                                                                           | Luan Felipe Botelho-Souza, Felipe Souza Nogueira-Lima, Tarcio Peixoto Fogaça, Alorene de Oliveira dos Santos, Felipe Gomes Naveca, Adriana Cristina Salvador Maia, Cicileia Correia da Silva, Alina Linares Ferreira de Melo Mendonça, Celina Aparecida Bertoni Lungenburg, Camilla Flávia Gomes Azzi, Juliana Loça Furado, Suellen Cavalcante, Rita de Cassia Pontelli Hampazzo, Caio Henrique Nemei Santos, Alice Paula Di Sabatino Guimarães, Jansen Fernandes de Medeiros, Fernando Rodrigues Máximo, Juan Miguel Villalobos-Salcedo and Deuslene Souza Vieira1 |
| EPI_ISL_514132                                                                                                                                                                 | Rondonia Central Public Health Laboratory (LAOEN/RO), vinculated to State Health Secretariat of Rondonia (SESAU/RO)                                                         | Molecular Virology Laboratory of Oswaldo Cruz Foundation of Rondonia                                                                                                                                                                                                                                                                                                                                                                                           | Luan Felipe Botelho-Souza, Felipe Souza Nogueira-Lima, Tarcio Peixoto Fogaça, Alorene de Oliveira dos Santos, Felipe Gomes Naveca, Adriana Cristina Salvador Maia, Cicileia Correia da Silva, Alina Linares Ferreira de Melo Mendonça, Celina Aparecida Bertoni Lungenburg, Camilla Flávia Gomes Azzi, Juliana Loça Furado, Suellen Cavalcante, Rita de Cassia Pontelli Hampazzo, Caio Henrique Nemei Santos, Alice Paula Di Sabatino Guimarães, Jansen Fernandes de Medeiros, Fernando Rodrigues Máximo, Juan Miguel Villalobos-Salcedo and Deuslene Souza Vieira  |
| EPI_ISL_514133, EPI_ISL_514134, EPI_ISL_514135, EPI_ISL_514136, EPI_ISL_514137, EPI_ISL_514138                                                                                 | Rondonia Central Public Health Laboratory (LAOEN/RO), vinculated to State Health Secretariat of Rondonia (SESAU/RO)                                                         | Molecular Virology Laboratory of Oswaldo Cruz Foundation of Rondonia                                                                                                                                                                                                                                                                                                                                                                                           | Luan Felipe Botelho-Souza, Felipe Souza Nogueira-Lima, Tarcio Peixoto Fogaça, Alorene de Oliveira dos Santos, Felipe Gomes Naveca, Adriana Cristina Salvador Maia, Cicileia Correia da Silva, Alina Linares Ferreira de Melo Mendonça, Celina Aparecida Bertoni Lungenburg, Camilla Flávia Gomes Azzi, Juliana Loça Furado, Suellen Cavalcante, Rita de Cassia Pontelli Hampazzo, Caio Henrique Nemei Santos, Alice Paula Di Sabatino Guimarães, Jansen Fernandes de Medeiros, Fernando Rodrigues Máximo, Juan Miguel Villalobos-Salcedo and Deuslene Souza Vieira  |
| EPI_ISL_514248                                                                                                                                                                 | National Institute of Laboratory Medicine and Referral Center                                                                                                               | Genomic Research Lab, BCSIR                                                                                                                                                                                                                                                                                                                                                                                                                                    | Abu Sayeed Mohammad Mahmud, Mohammad Samir Uzzaman, Eshwar Osman, Md. Anashtar Haido, Shaikhna Akter, Tarjina Akter Baru, Md. Mursheed Hassan Sarkar, Barna Goswami, Ifat Jahari, Md. Saddam Hossain, Upal Chandra Ray, Saikat Ahmed Sajib, Md. Salim Khan                                                                                                                                                                                                                                                                                                          |
| EPI_ISL_514253                                                                                                                                                                 | Advanced Biotechnology Laboratory                                                                                                                                           | Genomic Research Lab, BCSIR                                                                                                                                                                                                                                                                                                                                                                                                                                    | Neta Zuckerman, Eriat Dahan Bucris, Oran Eriker, Elia Mendelsohn, Michal Mandelboim                                                                                                                                                                                                                                                                                                                                                                                                                                                                                 |
| EPI_ISL_514268                                                                                                                                                                 | Israel Central Virology Laboratory                                                                                                                                          | Israel Central Virology Laboratory                                                                                                                                                                                                                                                                                                                                                                                                                             | Allam M. Ismail, A. Khumalo, Z. Kwenda, S. Mishral, P. Myyament, F. Morkale, T. Bhanan JN                                                                                                                                                                                                                                                                                                                                                                                                                                                                           |
| EPI_ISL_514354                                                                                                                                                                 | General Hospital - Piliap                                                                                                                                                   | Research Center for Genetic Engineering and Biotechnology "Georgi D. Efremov", Macedonian Academy of Sciences and Arts                                                                                                                                                                                                                                                                                                                                         | Shahzadeh Z., Hossainzadeh Ghaharfeh, N., Hashemi, S.M. and Beati, O.                                                                                                                                                                                                                                                                                                                                                                                                                                                                                               |
| EPI_ISL_514424                                                                                                                                                                 | National Institute for Communicable Diseases of the National Health Laboratory Service                                                                                      | National Institute for Communicable Diseases of the National Health Laboratory Service                                                                                                                                                                                                                                                                                                                                                                         | Jeong Min Kim, Yoon-Seok Chung, Namjo Lee, Sang Hee Woo, Hye-Jun Jo, Heui Man Kim, Jun-Sup Kim, Myung Guk Han                                                                                                                                                                                                                                                                                                                                                                                                                                                       |
| EPI_ISL_514753                                                                                                                                                                 | Yafabed Hospital, COVID Lab Center                                                                                                                                          | University of Tabriz                                                                                                                                                                                                                                                                                                                                                                                                                                           | Keih Durkin, Maria Aresi, Sebastian Bortems, Raphael Boreux, Cecile Meek, Axelle Chastlain, Céline Fombelle-Lopez, Perritte Meiri, Marie-Pierre Heyette, Vincent Bours.                                                                                                                                                                                                                                                                                                                                                                                             |
| EPI_ISL_514805, EPI_ISL_514851, EPI_ISL_514900, EPI_ISL_514944, EPI_ISL_514989                                                                                                 | Division of Viral Diseases, Center for Laboratory Control of Infectious Diseases, Korea Centers for Diseases Control and Prevention                                         | Division of Viral Diseases, Center for Laboratory Control of Infectious Diseases, Korea Centers for Diseases Control and Prevention                                                                                                                                                                                                                                                                                                                            | Ngou J.M., Quashie, P., Moringa, C.M., Amuzu, D.S., Adu, B., Kumordzi, S., Eshun, M., Boatman, L., Magnusson, V., Koeny, E., Te-Maya, F., Afiaguchi, A., Muringi, J.K., Bedlako, Y., Asante, I., Bonney, E., Iyie, G.B., Bonney, K., Amenga-Etego, L.N., Anang, A.K., Awandare, G.A., Ampofo, W.                                                                                                                                                                                                                                                                    |
| EPI_ISL_515055, EPI_ISL_515075                                                                                                                                                 | Department of Clinical Microbiology                                                                                                                                         | GIGA Medical Genomics                                                                                                                                                                                                                                                                                                                                                                                                                                          | Ivars Silamietis, Kaspars Megnis, Morna Ustinova, Ika Zieļos, Vija Rove, Selaia Lepa, Jana Ose, Marta Priedle, Uga Dumpis, Jins Klovis Claudio Travares Sachi, Claudia Regina Gonçalves, Erica Valessa Ramos Gomes                                                                                                                                                                                                                                                                                                                                                  |
| EPI_ISL_515100, EPI_ISL_515111                                                                                                                                                 | Department of Biochemistry, Cell and Molecular Biology                                                                                                                      | WACCBIP, University of Ghana                                                                                                                                                                                                                                                                                                                                                                                                                                   | Glandhari J, Pillay S, Lessells R, Mdlalose K, York D, Khan S, Tegally H, Wilkinson E, de Oliveira T                                                                                                                                                                                                                                                                                                                                                                                                                                                                |
| EPI_ISL_515196                                                                                                                                                                 | Centri laboratorija                                                                                                                                                         | Latvian Biomedical Research and Study Centre                                                                                                                                                                                                                                                                                                                                                                                                                   | Christian Baisel, Sarah Nadeau, Ivan Topolitsky, Pedro Ferreira, Philipp Jablonksi, Susana Posada, Céscopedes, Tobias Står, Iha Nissen, Natascha Sameroco, Etiole Burchen, Christiane Beckmann, Maurice Redondo, Olivier Kober, Ormiston Noppen, Sophie Seidel, Noemie Santamaria de Souza, Niko Beerwinkel, Tanja Stauder                                                                                                                                                                                                                                          |
| EPI_ISL_515525                                                                                                                                                                 | National Influenza Center - Instituto Adolfo Lutz                                                                                                                           | Instituto Adolfo Lutz, Interdisciplinary Procedures Center, Strategic Laboratory                                                                                                                                                                                                                                                                                                                                                                               | Gisela Barrera-Badillo , April Rodriguez-Maldonado, Claudia Wong-Mambola , Nativedy Cruz-Ortiz , Tatiana Nunes-Garcia, Dayanira Arellano-Suarez, Fabiola Carcer-Ayala, Edgar Mendola-Cordado, Lucia Hernandez-Rivas, Irma Lopez-Marinaz, Emerso Ramirez-Gonzalez, Juan José Guadalupe, Monica Becerra-Viong, Bernardo Gutiérrez, Nahil Dhik, Carlos Mena, Eddy Quiroz, Yomara Nappa, Verónica Barragán, Patricia Rojas-Silva, Gabriel Trueta, Michelle Granauer, Paul Cardenas                                                                                      |
| EPI_ISL_515642                                                                                                                                                                 | NHL-SI-ALCH                                                                                                                                                                 | KRISP, KZN Research Innovation and Sequencing Platform                                                                                                                                                                                                                                                                                                                                                                                                         | Prado-Vivar, Sully Márquez, Juan José Guadalupe, Monica Becerra-Viong, Bernardo Gutiérrez, Nahil Dhik, Carlos Mena, Eddy Quiroz, Yomara Nappa, Verónica Barragán, Patricia Rojas-Silva, Gabriel Trueta, Michelle Granauer, Paul Cardenas                                                                                                                                                                                                                                                                                                                            |
| EPI_ISL_516415, EPI_ISL_516424                                                                                                                                                 | Center for public health - Skopje                                                                                                                                           | Research Center for Genetic Engineering and Biotechnology "Georgi D. Efremov", Macedonian Academy of Sciences and Arts                                                                                                                                                                                                                                                                                                                                         | Ganadi, Hernda Wibawa, Marcelus, Mohamad S. Hakim, Edwin W. Darmawijaya, Ludwig P. Rizki, Endah Supriyati, Eggi Arguni, Tik Nuryastuti, Tri Wibawa, Dwi AA Nugrahainingsih, Alahayati, Siswanto, Aivin S. Kallim, Desyfa Mursalin                                                                                                                                                                                                                                                                                                                                   |
| EPI_ISL_516428, EPI_ISL_516429, EPI_ISL_516431                                                                                                                                 | Clinical Hospital - Ship                                                                                                                                                    | Research Center for Genetic Engineering and Biotechnology "Georgi D. Efremov", Macedonian Academy of Sciences and Arts                                                                                                                                                                                                                                                                                                                                         | Mak TM, Octavia S, Zhou Z, Cui L, Lin RTP                                                                                                                                                                                                                                                                                                                                                                                                                                                                                                                           |
| EPI_ISL_516559                                                                                                                                                                 | Volier AG                                                                                                                                                                   | Department of Biosystems Science and Engineering, ETH Zurich                                                                                                                                                                                                                                                                                                                                                                                                   |                                                                                                                                                                                                                                                                                                                                                                                                                                                                                                                                                                     |
| EPI_ISL_516611, EPI_ISL_516825                                                                                                                                                 | Instituto de Diagnostico y Referencia Epidemiologicos (INDRE)                                                                                                               | Instituto de Diagnostico y Referencia Epidemiologicos (INDRE)                                                                                                                                                                                                                                                                                                                                                                                                  |                                                                                                                                                                                                                                                                                                                                                                                                                                                                                                                                                                     |
| EPI_ISL_516648                                                                                                                                                                 | Institute of Microbiology, Universidad San Francisco de Quito                                                                                                               | Institute of Microbiology, Universidad San Francisco de Quito                                                                                                                                                                                                                                                                                                                                                                                                  |                                                                                                                                                                                                                                                                                                                                                                                                                                                                                                                                                                     |
| EPI_ISL_516652                                                                                                                                                                 | Institute of Microbiology, Universidad San Francisco de Quito                                                                                                               | Institute of Microbiology, Universidad San Francisco de Quito                                                                                                                                                                                                                                                                                                                                                                                                  |                                                                                                                                                                                                                                                                                                                                                                                                                                                                                                                                                                     |
| EPI_ISL_516800                                                                                                                                                                 | Rumah Sakit Akademik Universitas Gadjah Mada                                                                                                                                | Genetics Working Group (Pokia Genetik) Faculty of Medicine, Public Health and Nursing Universitas Gadjah Mada (FK-KMK UGM), Disease Investigation Center Wates Ministry of Agriculture Indonesia, Department of Microbiology FK-KMK UGM, Laboratorium Diagnostik Yayasan Taha World Mosquito Program (WMP) Yogyakarta Center for Tropical Medicine FK-KMK UGM, Integrated Research center FK-KMK UGM, Department of Computer Science and Electronics FMIPA UGM |                                                                                                                                                                                                                                                                                                                                                                                                                                                                                                                                                                     |
| EPI_ISL_516813                                                                                                                                                                 | National Public Health Laboratory, National Centre for                                                                                                                      | National Public Health Laboratory, National Centre for                                                                                                                                                                                                                                                                                                                                                                                                         |                                                                                                                                                                                                                                                                                                                                                                                                                                                                                                                                                                     |

|                                                                                                                                |                                                                                                                 |                                                                                                                                     |                                                                                                                                                                                                                                                                                                                                                                                                                                                                |                                                                                                                                                                                                                                                                                                                                                                                                                                                                        |
|--------------------------------------------------------------------------------------------------------------------------------|-----------------------------------------------------------------------------------------------------------------|-------------------------------------------------------------------------------------------------------------------------------------|----------------------------------------------------------------------------------------------------------------------------------------------------------------------------------------------------------------------------------------------------------------------------------------------------------------------------------------------------------------------------------------------------------------------------------------------------------------|------------------------------------------------------------------------------------------------------------------------------------------------------------------------------------------------------------------------------------------------------------------------------------------------------------------------------------------------------------------------------------------------------------------------------------------------------------------------|
| EPI_ISL_516829                                                                                                                 | Infectious Diseases                                                                                             | RSUD Nyi Ageng Serang                                                                                                               | Genetics Working Group (Pekia Genetik) Faculty of Medicine, Public Health and Nursing Universitas Gadjah Mada (FK-KMK UGM), Disease Investigation Center Wates Ministry of Agriculture Indonesia, Department of Microbiology FK-KMK UGM, Laboratorium Diagnostik Yayasan Taha World Mosquito Program (WMP) Yogyakarta Center for Tropical Medicine FK-KMK UGM, Integrated Research Center FK-KMK UGM, Department of Computer Science and Electronics FMIPA UGM | Gunadi, Herdita Wibawa, . Marcellus, Mohamad S, Hakim, Edwin W, Damwijaya, Ludharg P, Rizki, Erdah Supriati, Eggi Aguni, Tik Nurysulfi, Tri Wibawa, Dw AA Nugrahainingsih, Alhadyati, ., Siswanto, Bayu Dewi Satrika, Dyan Ayu Puspitarani                                                                                                                                                                                                                             |
| EPI_ISL_516925, EPI_ISL_516913, EPI_ISL_516917, EPI_ISL_516931                                                                 | Department for Molecular Diagnostics, Centre for Medical Microbiology, Institute of Public Health of Montenegro | Israel Central Virology laboratory                                                                                                  | Charite Universitaetsmedizin Berlin, Institut für Virologie                                                                                                                                                                                                                                                                                                                                                                                                    | Victor M Corman, Terry Jones, Jörn Behrm-Schwarzbach, Barbara Muehlenmann, Talitha Veith, Julia Schneider, Marjia Govedarica and Danijela Vujanovic, Christian Doosen                                                                                                                                                                                                                                                                                                  |
| EPI_ISL_516938                                                                                                                 | Nicolae Testemitanu State University of Medicine and Pharmacy                                                   | International Centre for Genetic Engineering and Biotechnology (IGGEB) and ARGO Open Lab Platform for Genome Sequencing             | Erasmus Medical Center                                                                                                                                                                                                                                                                                                                                                                                                                                         | Nela Zuckerman, Eriat Dahan Burris, Oran Erster, Eila Mendelson, Michal Mandelboim                                                                                                                                                                                                                                                                                                                                                                                     |
| EPI_ISL_517616, EPI_ISL_517621, EPI_ISL_517624, EPI_ISL_517657, EPI_ISL_517658, EPI_ISL_518817                                 | Academic Hospital Paramaribo                                                                                    | Erasmus Medical Center                                                                                                              | MDU-PHL                                                                                                                                                                                                                                                                                                                                                                                                                                                        | Bas Oude Munnik, Dion Galadin, Ed Jzerman, Emmanuelle Wulger, Gary Gummeis, Ingrid Krishnadati, Lycké Wollitz, Marlon Koopmans, Mireille Van de Vaer, Princes Wongsoedjono, Radjesh Oti, Rohma Banwar, Stephen Vreden                                                                                                                                                                                                                                                  |
| EPI_ISL_519114, EPI_ISL_519157                                                                                                 | Microbiological Diagnostic Unit - Public Health Laboratory (MDU-PHL)                                            | Al Jallia Genomics Center                                                                                                           | MDU-PHL                                                                                                                                                                                                                                                                                                                                                                                                                                                        | Seemann T., Schultz M., Sait, M., Sherry, N.                                                                                                                                                                                                                                                                                                                                                                                                                           |
| EPI_ISL_520687, EPI_ISL_520706, EPI_ISL_520713, EPI_ISL_520742                                                                 | Mohammed Bin Rashid University of Medicine and Health Sciences                                                  | VIDRI and MDU-PHL                                                                                                                   |                                                                                                                                                                                                                                                                                                                                                                                                                                                                | Ahmed Abou Tayoun, Tom Loney, Hamda Khrasaneh, Sathishkumar Ramaswamy, Divinial Harieli, Zulia Omar Deesi, Rupa Murthy, Varqhesa, Hanan Al Suwaidi, Abdulnagheed Alkhrja, Mohammed Uddin, Rifat Hamoudi, Rabih Halwani, Abiola Catherine Senok, Quinyha Hamid, Norbert Nowotny, Alawi Alsheikh-Alli                                                                                                                                                                    |
| EPI_ISL_521120, EPI_ISL_521482, EPI_ISL_521924, EPI_ISL_521925                                                                 | Victorian Infectious Diseases Reference Laboratory (VIDRI)                                                      | Center for Laboratory Control of Infectious Diseases, Korea Centers for Diseases Control and Prevention                             | VIDRI and MDU-PHL                                                                                                                                                                                                                                                                                                                                                                                                                                              | Cally L., Seemann T., Sait, M., Schultz M., Duce J., Sherry, N.                                                                                                                                                                                                                                                                                                                                                                                                        |
| EPI_ISL_522479, EPI_ISL_522492                                                                                                 | Center for Laboratory Control of Infectious Diseases, Korea Centers for Diseases Control and Prevention         | Division of Viral Diseases, Center for Laboratory Control of Infectious Diseases, Korea Centers for Diseases Control and Prevention | Jeong Min Kim, Yoon-Seok Chung                                                                                                                                                                                                                                                                                                                                                                                                                                 | Junyoung Kim, Ae Kyung Park, Eunyoung Shin, Jin Sun No, Jeong-Min Kim, Yoon-Seok Chung, Heui Man Kim, Myung Guk Han                                                                                                                                                                                                                                                                                                                                                    |
| EPI_ISL_522526                                                                                                                 | Division of Infectious Diseases, Korea Centers for Diseases Control and Prevention                              | Maryland Department of Health                                                                                                       |                                                                                                                                                                                                                                                                                                                                                                                                                                                                | Ulsess9 Scaligera                                                                                                                                                                                                                                                                                                                                                                                                                                                      |
| EPI_ISL_522834                                                                                                                 | UlSS9 Scaligera                                                                                                 | Istituto Zooprofilattico Sperimentale delle Venezie                                                                                 |                                                                                                                                                                                                                                                                                                                                                                                                                                                                | Adelaide Milan, Alessia Schivo, Annalisa Savirio, Erika Giorgia Quaranta, Giampiero Zamperin, Ambra Pastori, Bianca Zecchin, Alice Fusaro, Calogero Terrajolo, Antonia Ricci                                                                                                                                                                                                                                                                                           |
| EPI_ISL_522859                                                                                                                 | UlSS9 Scaligera                                                                                                 | Erasmus Medical Center                                                                                                              |                                                                                                                                                                                                                                                                                                                                                                                                                                                                | Hidalgo-Miranda A., Mendoza Vargas A., Reyes-Grateda J.P., Cisneros-Villanueva M., Cedro-Taranda A., Hurtado-Cordova E., Peñafoza-Figueroa F., Herrera-Montalvo LA                                                                                                                                                                                                                                                                                                     |
| EPI_ISL_522874                                                                                                                 | Instituto Nacional de Medicina Genómica                                                                         | Instituto Nacional de Medicina Genómica                                                                                             |                                                                                                                                                                                                                                                                                                                                                                                                                                                                | Bas Oude Munnik, David Neuvenhuijse, Reina Sikkema, Claudia Schependorik, Inna Chrestakova, Anne van der Linden, Theo Bastiebroer, Stefan van Nieuwoop, Mark Pronk, Pascal Lexmond, Corin Swaan, Manon Hevrickate, Madelief Moliers, Marj Sten, Sandra Kengne Kamga Mbou, Jeroen van Kampen, Jolanda Voermans, Aura Timen, Corine GeurtsvanKessel, Annemiek van der Eijk, Richard Woldenkamp, Marlon Koopmans, on behalf of the Dutch national COVID-19 response team. |
| EPI_ISL_523200, EPI_ISL_523364, EPI_ISL_523383                                                                                 | Dutch COVID-19 response team                                                                                    | Erasmus Medical Center                                                                                                              |                                                                                                                                                                                                                                                                                                                                                                                                                                                                | Hidalgo-Miranda A., Mendoza Vargas A., Reyes-Grateda J.P., Cisneros-Villanueva M., Cedro-Taranda A., Hurtado-Cordova E., Peñafoza-Figueroa F., Herrera-Montalvo LA                                                                                                                                                                                                                                                                                                     |
| EPI_ISL_523307                                                                                                                 | Instituto Nacional de Medicina Genómica                                                                         | Instituto Nacional de Medicina Genómica                                                                                             |                                                                                                                                                                                                                                                                                                                                                                                                                                                                | Bas Oude Munnik, David Neuvenhuijse, Reina Sikkema, Claudia Schependorik, Inna Chrestakova, Anne van der Linden, Theo Bastiebroer, Stefan van Nieuwoop, Mark Pronk, Pascal Lexmond, Corin Swaan, Manon Hevrickate, Madelief Moliers, Marj Sten, Sandra Kengne Kamga Mbou, Jeroen van Kampen, Jolanda Voermans, Aura Timen, Corine GeurtsvanKessel, Annemiek van der Eijk, Richard Woldenkamp, Marlon Koopmans, on behalf of the Dutch national COVID-19 response team. |
| EPI_ISL_523515, EPI_ISL_523613, EPI_ISL_523632, EPI_ISL_523688, EPI_ISL_523713, EPI_ISL_523731, EPI_ISL_523735, EPI_ISL_523802 | Dutch COVID-19 response team                                                                                    | Erasmus Medical Center                                                                                                              |                                                                                                                                                                                                                                                                                                                                                                                                                                                                | Hidalgo-Miranda A., Mendoza Vargas A., Reyes-Grateda J.P., Cisneros-Villanueva M., Cedro-Taranda A., Hurtado-Cordova E., Peñafoza-Figueroa F., Herrera-Montalvo LA                                                                                                                                                                                                                                                                                                     |
| EPI_ISL_523907                                                                                                                 | Vollter AG                                                                                                      | Department of Biosystems Science and Engineering, ETH Zurich                                                                        |                                                                                                                                                                                                                                                                                                                                                                                                                                                                | Christian Beisel, Sarah Nadeau, Van Topolsky, Pedro Ferreira, Philipp Jablonski, Susana Posada-Céspedes, Tobias Schat, Ina Nissen, Natascia Santacroce, Elodie Burcklen, Christiane Beckmann, Maurice Beckmann, Nihko Kobel, Christoph Noppert, Sophie Seidel, Noemie Santamania de Souza, Niko Beerenwinkel, Tanja Stadler                                                                                                                                            |
| EPI_ISL_523959                                                                                                                 | Pronto Socorro Municipal de Perus                                                                               | Instituto Adolfo Lutz, Interdisciplinary Procedures Center, Strategic Laboratory                                                    |                                                                                                                                                                                                                                                                                                                                                                                                                                                                | Claudio Travares Sacchi, Claudia Regina Gonçalves, Erica Vallessa Ramos Gomes                                                                                                                                                                                                                                                                                                                                                                                          |
| EPI_ISL_524022                                                                                                                 | WHO National Influenza Centre Russian Federation                                                                | WHO National Influenza Centre Russian Federation                                                                                    |                                                                                                                                                                                                                                                                                                                                                                                                                                                                | Andrey Komissarov, Atram Fadeev, Maria Sergeeva, Anna Ivanova, Daria Danilenko                                                                                                                                                                                                                                                                                                                                                                                         |
| EPI_ISL_524426                                                                                                                 | Egyptian National Cancer Institute (ENCI)                                                                       | Egyptian National Cancer Institute (ENCI)                                                                                           |                                                                                                                                                                                                                                                                                                                                                                                                                                                                | Zekri, Abdel Rahman N., Amer K.E., Ahmed O.S., Soliman H.K., Ali M.A., Hassan W.A., Mahmoud A.A., Khatatba A.A., Hafez J.M., Akouhroda, Mohamed                                                                                                                                                                                                                                                                                                                        |
| EPI_ISL_524468                                                                                                                 | Hospital Municipal Vereador Jose Storopoli                                                                      | Instituto Adolfo Lutz, Interdisciplinary Procedures Center, Strategic Laboratory                                                    |                                                                                                                                                                                                                                                                                                                                                                                                                                                                | Claudio Travares Sacchi, Claudia Regina Gonçalves, Erica Vallessa Ramos Gomes                                                                                                                                                                                                                                                                                                                                                                                          |
| EPI_ISL_524469                                                                                                                 | Santa Casa de Misericordia de Sao Paulo                                                                         | Instituto Adolfo Lutz, Interdisciplinary Procedures Center, Strategic Laboratory                                                    |                                                                                                                                                                                                                                                                                                                                                                                                                                                                | Claudio Travares Sacchi, Claudia Regina Gonçalves, Erica Vallessa Ramos Gomes                                                                                                                                                                                                                                                                                                                                                                                          |
| EPI_ISL_524470                                                                                                                 | Hospital do Servidor Público Estadual Francisco Morato de Oliveira                                              | Instituto Adolfo Lutz, Interdisciplinary Procedures Center, Strategic Laboratory                                                    |                                                                                                                                                                                                                                                                                                                                                                                                                                                                | Claudio Travares Sacchi, Claudia Regina Gonçalves, Erica Vallessa Ramos Gomes                                                                                                                                                                                                                                                                                                                                                                                          |
| EPI_ISL_524786, EPI_ISL_524786, EPI_ISL_524789, EPI_ISL_524799, EPI_ISL_524800                                                 | Evandro Chagas Institute                                                                                        | Evandro Chagas Institute                                                                                                            |                                                                                                                                                                                                                                                                                                                                                                                                                                                                | Santos, M.C.; Silva, A.M.; Junior, W.D.C.; Barbogelata, L.S.; Ferreira, J.A.; Sousa, E.M.A.; da Silva, P.S.; Resque, H.R; Martins, L.C.; Sousa Junior, E.C.; Viana, G.M.F.R                                                                                                                                                                                                                                                                                            |
| EPI_ISL_525352, EPI_ISL_525390, EPI_ISL_525418                                                                                 | National Virus Reference Laboratory                                                                             | National Virus Reference Laboratory                                                                                                 |                                                                                                                                                                                                                                                                                                                                                                                                                                                                | Michael Carr, Gabriel Gonzalez, Jonathan Dean, Aditi Chaturvedi, Suzie Couglhan, Cillian F De Gassun                                                                                                                                                                                                                                                                                                                                                                   |
| EPI_ISL_525431                                                                                                                 | Institute of Microbiology, Universidad San Francisco de Quito                                                   | Institute of Microbiology, Universidad San Francisco de Quito                                                                       |                                                                                                                                                                                                                                                                                                                                                                                                                                                                | Juan José Guadalupe, Monica Becerra-Wong, Belen Prado-Vivar, Sully Márquez, Ugia Briceno, Carlos Mana, Nahli Dahik, Bernardo Gutiérrez, Verónica Barragán, Patricio Rojas-Silva, Gabriel Granauer, Paul Cárdenas                                                                                                                                                                                                                                                       |
| EPI_ISL_525467                                                                                                                 | Universidad Iberoamericana                                                                                      | International Centre for Genetic Engineering and Biotechnology (IGGEB) and ARGO Open Lab Platform                                   |                                                                                                                                                                                                                                                                                                                                                                                                                                                                | Robert Paulino-Ramirez, Eileen Riego, Alejandro Valdejo Degandenzi, Victor Virgilio Calderon, Leandro Tapia, Patricia Leon, Danilo Licastro, Simeone Dal Monaco, Steephil Rajasekharan and Alessandro Marcello                                                                                                                                                                                                                                                         |
| EPI_ISL_525481                                                                                                                 | Centre for Dengue Research                                                                                      | Centre for Dengue Research                                                                                                          |                                                                                                                                                                                                                                                                                                                                                                                                                                                                | Chandima Jeewandara, Deshni Jayathilaka, Dinuka Anjarahe, Laksiri Gomes, Divyanti Ranasinghe, Ananda Wijewickrama, Eranga Narayana, Dhanayarithi Idampitaya, Gathsaruf Neelika Malawige                                                                                                                                                                                                                                                                                |
| EPI_ISL_525486                                                                                                                 | Centre for Dengue Research                                                                                      | Centre for Dengue Research                                                                                                          |                                                                                                                                                                                                                                                                                                                                                                                                                                                                | Chandima Jeewandara, Deshni Jayathilaka, Dinuka Anjarahe, Laksiri Gomes, Divyanti Ranasinghe, Ananda Wijewickrama, Malika Karunaratne, Eranga Narayana, Dhanayarithi Idampitaya, Gathsaruf Neelika Malawige                                                                                                                                                                                                                                                            |
| EPI_ISL_526220, EPI_ISL_526223, EPI_ISL_526224, EPI_ISL_526225, EPI_ISL_526236                                                 | Hungarian Defence Forces Military Medical Centre                                                                | National Laboratory of Virology, Szentgöhal Research Centre                                                                         |                                                                                                                                                                                                                                                                                                                                                                                                                                                                | Erdre Gábor Toth, Balázs Somogyi, Bálint Eszényi, Ferenc Jakab, Gábor Keményesi                                                                                                                                                                                                                                                                                                                                                                                        |

|                                                                                |                                                                                                                                                                                  |                                                                                                                                                                                                                  |                                                                                                                                                                                                                                                                                                                                                                                                                                                                                                                                                                                                                                                                                                                                                                                                                                            |
|--------------------------------------------------------------------------------|----------------------------------------------------------------------------------------------------------------------------------------------------------------------------------|------------------------------------------------------------------------------------------------------------------------------------------------------------------------------------------------------------------|--------------------------------------------------------------------------------------------------------------------------------------------------------------------------------------------------------------------------------------------------------------------------------------------------------------------------------------------------------------------------------------------------------------------------------------------------------------------------------------------------------------------------------------------------------------------------------------------------------------------------------------------------------------------------------------------------------------------------------------------------------------------------------------------------------------------------------------------|
| EPI_ISL_526259, EPI_ISL_526268, EPI_ISL_526275                                 | Unity Health Toronto                                                                                                                                                             | Ontario Institute for Cancer Research                                                                                                                                                                            | Ranzai Fatouh, Larissa M., Matukas, Mark, Downing, Amelie Gower, Karol Boissinot, Samira Mulaetka, TBDN, Ilirca Lungu, Bernard Lam, Jeremy Johns, Sam Haldenby, Anlie Lucaci, Steve Paterson, Julian Hiscox, Alistair Darty, M Almsaid, A Alrezaili, Muhammad Alruwaihi, Stuart D Armstrong, Jones Benjamin, Eleanor G Bentley, Anu Chawla, Jordan J Clark, Angela Cowell, Richard Eccles, Isabel Garcia-Dorival, Matthew Gemmill, Alessandro Gerada, PFF Gilmore, Richard Gregory, Xinrong Han, Catherine Hartley, Margaret Hughes, Wilen Iuriza-Gomara, James Johnson, L Liu, Jennifer Manson, Charlotte Nelson, Elaine O'Toole, Cassie Olateji, Rebekah Penrice-Randell, Lucille Rankow, N.P Randle, Trevor Ian Robinson, Parul Sharma, Ghada T Shawill, James P Stewart, Neil Swainston, Ecaterina Vamos, Joanna Waits, Mark Whitehead |
| EPI_ISL_526372                                                                 | Liverpool Clinical Laboratories                                                                                                                                                  | COVID-19 Genomics UK (COG-UK) Consortium                                                                                                                                                                         | Pau Krzyzanowski, Richard de Boija, Fátima Vincoli, Philip Zuzarte, Jared Simpson                                                                                                                                                                                                                                                                                                                                                                                                                                                                                                                                                                                                                                                                                                                                                          |
| EPI_ISL_526727                                                                 | Division of Viral Diseases, Center for Laboratory Control of Infectious Diseases                                                                                                 | Division of Viral Diseases, Center for Laboratory Control of Infectious Diseases, Korea Centers for Disease Control and Prevention                                                                               | Jeong-Min Kim, Yoon-Seok Chung, Namjoon Lee, Sang Hee Woo, Hye-Jun Jo, Heui Man Kim, Jun-Soo Kim, Myung Guk Han                                                                                                                                                                                                                                                                                                                                                                                                                                                                                                                                                                                                                                                                                                                            |
| EPI_ISL_526746                                                                 | Center for Laboratory Control of Infectious Diseases, Korea Centers for Disease Control and Prevention                                                                           | Center for Laboratory Control of Infectious Diseases, Korea Centers for Disease Control and Prevention                                                                                                           | Junyoung Kim, Ae Kyung Park, Eunhyung Shin, Jin Sun No, Jeong-Min Kim, Yoon-Seok Chung, Heui Man Kim, Myung Guk Han                                                                                                                                                                                                                                                                                                                                                                                                                                                                                                                                                                                                                                                                                                                        |
| EPI_ISL_526933, EPI_ISL_526949, EPI_ISL_526958, EPI_ISL_526967, EPI_ISL_526971 | Instituto Nacional de Salud, Bogotá, Colombia                                                                                                                                    | Instituto Nacional de Salud, Bogotá, Colombia                                                                                                                                                                    | Katherine Laiton-Donato, Diego A. Alvarez-Diaz, Carlos Franco-Murzo, Mauricio Pacheco-Monteleagre, Jonathan Peales, Diego Andrés Prada, Jose A. Urme-Ciro, Zulma M. Cucunubá, Christian Julian Villabona-Arenas, Liz Villabona-Arenas, Susay Echeverría Astud C, Florez, Carolina Ferro, Diana Marcela Walteros-Acero, Franklin Pinedo, Carlos Andrés Durán, Martha Lucia Martínez, Marcela Mercado-Reyes                                                                                                                                                                                                                                                                                                                                                                                                                                  |
| EPI_ISL_526975, EPI_ISL_526986                                                 | Biological prevention, army                                                                                                                                                      | Biological prevention, army                                                                                                                                                                                      | Seadawy, M.G., Gad, A.F., Harry, B.E., Elhoseny, M.F., Sharnel, M.D.                                                                                                                                                                                                                                                                                                                                                                                                                                                                                                                                                                                                                                                                                                                                                                       |
| EPI_ISL_527359, EPI_ISL_527363                                                 | National Public Health Laboratory, National Centre for Infectious Diseases                                                                                                       | National Public Health Laboratory, National Centre for Infectious Diseases                                                                                                                                       | Mak TM, Octavia S, Zhou Z, Cui L, Lin RTP                                                                                                                                                                                                                                                                                                                                                                                                                                                                                                                                                                                                                                                                                                                                                                                                  |
| EPI_ISL_527547, EPI_ISL_527550                                                 | Viral Respiratory Lab, National Institute for Biomedical Research (INIB) Hospital Metropolitanano                                                                                | Pathogen Sequencing Lab, National Institute for Biomedical Research (INIB)                                                                                                                                       | Praedie Mbale-Kingebeni, Edith Nwemba, Eddy Kiriganda-Lusamaki, Anuri Aziza, Francisca Muryemba Mawete, Emmanuel Lukito Lofko, Catherine Pratt, Mathias Faulmer, Joshi Quirk, Alison Black, James Hatfield, Trevor Bedford, Ian Goodenow, Andrew Hamard, Nick Lorenz, Kristian Andersen, Michael Wiley, Steve Anukam-Munroe, Jean-Jacques Wuyembe Taramun                                                                                                                                                                                                                                                                                                                                                                                                                                                                                  |
| EPI_ISL_527741                                                                 | Hospital Metropolitanano                                                                                                                                                         | Indecsa, Instituto Costarricense de Investigación y Enseñanza en Nutrición y Salud                                                                                                                               | Francisco Duarte, Hebleen Porras, Claudio Sobó-Garita, Estela Cordero, Adriana Godínez & Melany Calderon                                                                                                                                                                                                                                                                                                                                                                                                                                                                                                                                                                                                                                                                                                                                   |
| EPI_ISL_527748                                                                 | Area De Salud Corredores                                                                                                                                                         | Indecsa, Instituto Costarricense de Investigación y Enseñanza en Nutrición y Salud                                                                                                                               | Francisco Duarte, Hebleen Porras, Claudio Sobó-Garita, Estela Cordero, Adriana Godínez & Melany Calderon                                                                                                                                                                                                                                                                                                                                                                                                                                                                                                                                                                                                                                                                                                                                   |
| EPI_ISL_527809                                                                 | Institute of Microbiology, Universidad San Francisco de Quito                                                                                                                    | Institute of Microbiology, Universidad San Francisco de Quito                                                                                                                                                    | Belén Prado-Vivar, Sully Márquez, Juan José Guadalupe, Monica Becerra-Wong, Bernardo Gutiérrez, Stephanie Arequi, Pano Bracho, Karina Barragan, Anita Garcia, Carlos Tobar, Verónica Barragan, Patricia Rojas-Silva, Gabriel Truaba, Michelle Gunzauer, Pauli Corderas                                                                                                                                                                                                                                                                                                                                                                                                                                                                                                                                                                     |
| EPI_ISL_527873, EPI_ISL_527883, EPI_ISL_527887, EPI_ISL_527899, EPI_ISL_527914 | Nigeria Centre for Disease Control (NCDC)                                                                                                                                        | African Centre of Excellence for Genomics of Infectious Diseases (ACEGID), Redeemer's University, Ede, Osun State, Nigeria                                                                                       | Olunjuye P. E. et al                                                                                                                                                                                                                                                                                                                                                                                                                                                                                                                                                                                                                                                                                                                                                                                                                       |
| EPI_ISL_528694, EPI_ISL_528701, EPI_ISL_528702, EPI_ISL_528703, EPI_ISL_528705 | Alsatir - Khalifa University Abu Dhabi                                                                                                                                           | Alsatir - Khalifa University Abu Dhabi                                                                                                                                                                           | Andreas Henschel, Gihan Daw Ehsat, Samuel Feng, Riha Hamoudi, Ernesto Damiani, Guan Tay, Habiba Alsatir                                                                                                                                                                                                                                                                                                                                                                                                                                                                                                                                                                                                                                                                                                                                    |
| EPI_ISL_528746                                                                 | Immanuel Hospital                                                                                                                                                                | Molecular Genetics Laboratory-Faculty of Medicine-Universitas Padjadjaran; School of Life Sciences and Technology & School of Pharmacy-Institusi Teknologi Bandung; Laboratorium Keseliatan Provinsi Jawa Barat  | Yunia Sibudiantji, Ti Hanggono Achmad, Mas Rizky A.A Syamsunarno, Feni Anallina, Catur Riani, Azzania Fihriani, Husna Nugrahaprija, Marselina Rasnasia Tan, Tarwedi, Ena Rahmawati, Savira Ekawatihani, Hesti Lina Witasari, Ryan Bayusantika Hristardi, Rifky Waluygati Rachman, Cui Nur Cinthia Alamanda, Lia Faridat, Hamman Rizka, Sony Solisia Wirawan, Agung Eru Wibowo, Ivan Falzai                                                                                                                                                                                                                                                                                                                                                                                                                                                 |
| EPI_ISL_528747                                                                 | Santo Barromeus Hospital                                                                                                                                                         | School of Pharmacy & School of Life Sciences and Technology - Institut Teknologi Bandung; Molecular Genetics Laboratory-Faculty of Medicine-Universitas Padjadjaran; Laboratorium Keseliatan Provinsi Jawa Barat | Catur Riani, Marselina Rasnasia Tan, Yunia Sibudiantji, Azzania Fihriani, Husna Nugrahaprija, Tarwedi, Ena Rahmawati, Savira Ekawatihani, Hesti Lina Witasari, Ryan Bayusantika Hristardi, Rifky Waluygati Rachman, Cui Nur Cinthia Alamanda, Lia Faridat, Wiharubi Faridi, Kasmiratu Khionunisa, Hamman Rizka, Sony Solisia Wirawan, Agung Eru Wibowo, Ivan Falzai                                                                                                                                                                                                                                                                                                                                                                                                                                                                        |
| EPI_ISL_528753                                                                 | Dinkes Kota Bogor                                                                                                                                                                | School of Life Sciences and Technology & School of Pharmacy-Institusi Teknologi Bandung; Molecular Genetics Laboratory-Faculty of Medicine-Universitas Padjadjaran; Laboratorium Keseliatan Provinsi Jawa Barat  | Azzania Fihriani, Catur Riani, Marselina Rasnasia Tan, Yunia Sibudiantji, Husna Nugrahaprija, Tarwedi, Ena Rahmawati, Savira Ekawatihani, Hesti Lina Witasari, Ryan Bayusantika Hristardi, Rifky Waluygati Rachman, Cui Nur Cinthia Alamanda, Lia Faridat, Davin H. E. Setiamaqna, Rizki Mardian, Hamman Rizka, Sony Solisia Wirawan, Agung Eru Wibowo, Ivan Falzai                                                                                                                                                                                                                                                                                                                                                                                                                                                                        |
| EPI_ISL_528813, EPI_ISL_528818                                                 | Department of Medicine, Gandhi hospital, Hyderabad                                                                                                                               | CSIR-Centre for Cellular and Molecular Biology                                                                                                                                                                   | Vinayasekhar Aedula, Thrilok Chandler Bingli, Rajarao Mesi-pogu, Shagunika Khan, Lamuk Zaveri, Namram Gaur, Sakshi Shambravi, Nikhil Heljims, M Soujanya Reddy, Prathusa Maccoa, Tulasi Nagabandi, Puneshobhan Vodnala, Payal Mukherjee, Soia Banu, Priya Singh, Onika Kulkarni, Dhruva Vedagiri, Divya Gupta, Vistal San, Santosh Kumar Kuncha, Krishan Harinivas Harshan, Archana Bharadwaj Siva, Kartik Bharadwaj Talipatka, Umesh Kumar, Uns Ahmad Bhat, Ajay Sarawagi, Priyanka Pant, Rajkanwar Nahataw, Rakesh K Mishra, Divya Tej, Sowpati                                                                                                                                                                                                                                                                                          |
| EPI_ISL_528947                                                                 | Agenzia di Tutela della Salute di Bergamo                                                                                                                                        | Istituto Zooprofilattico Sperimentale dell'Abruzzo e Molise -G.Caporale*                                                                                                                                         | Lorusso A, Marceci M, Di Domenico M, Curiñi V, Ancora M, Cammà C, Rinaldi A, Mangone I, Di Pasquale A, Puglia I, Savini G.                                                                                                                                                                                                                                                                                                                                                                                                                                                                                                                                                                                                                                                                                                                 |
| EPI_ISL_528993                                                                 | Ospedale Civile S. Liberatore-Atri                                                                                                                                               | Istituto Zooprofilattico Sperimentale dell'Abruzzo e Molise -G.Caporale*                                                                                                                                         | Lorusso A, Marceci M, Di Domenico M, Curiñi V, Ancora M, Cammà C, Rinaldi A, Mangone I, Di Pasquale A, Puglia I, Savini G.                                                                                                                                                                                                                                                                                                                                                                                                                                                                                                                                                                                                                                                                                                                 |
| EPI_ISL_529014                                                                 | Ospedale "Ss. Annunziata"                                                                                                                                                        | Istituto Zooprofilattico Sperimentale dell'Abruzzo e Molise -G.Caporale                                                                                                                                          | Lorusso A, Marceci M, Di Domenico M, Curiñi V, Ancora M, Cammà C, Rinaldi A, Mangone I, Di Pasquale A, Puglia I, Savini G.                                                                                                                                                                                                                                                                                                                                                                                                                                                                                                                                                                                                                                                                                                                 |
| EPI_ISL_529031                                                                 | Central Molecular Microbiology Laboratory, Clinical and Chemical Pathology Department, Faculty of Medicine, CAIRO UNIVERSITY                                                     | Next Generation Sequencing Reference Laboratory, Faculty of Medicine, Cairo University and The Center for Genome and Microbiome Research, Faculty of Pharmacy, CAIRO UNIVERSITY                                  | May Sherif Soliman, May Abdelattah, Ramy Karam Aziz                                                                                                                                                                                                                                                                                                                                                                                                                                                                                                                                                                                                                                                                                                                                                                                        |
| EPI_ISL_529032                                                                 | Central Molecular Microbiology Laboratory and Next Generation Sequencing Reference Laboratory, Clinical and Chemical Pathology Department, Faculty of Medicine, CAIRO UNIVERSITY | Next Generation Sequencing Reference Laboratory, Faculty of Medicine, Cairo University and The Center for Genome and Microbiome Research, Faculty of Pharmacy, CAIRO UNIVERSITY                                  | May Sherif Soliman, May Abdelattah, Ramy Karam Aziz                                                                                                                                                                                                                                                                                                                                                                                                                                                                                                                                                                                                                                                                                                                                                                                        |
| EPI_ISL_529067                                                                 | Laboratorio de Referencia Nacional de Virus Respiratorios, Instituto Nacional de Salud Peru                                                                                      | Laboratorio de Genómica Microbiana, Universidad Peruana Cayetano Heredia                                                                                                                                         | Pablo Tsukayama, Alejandra Davila Barclay, Luis González, Pedro E. Romero, Brenda Ayzarna, Janei Huancachoque, Pooli Marcos, Maribel Huarinaga                                                                                                                                                                                                                                                                                                                                                                                                                                                                                                                                                                                                                                                                                             |
| EPI_ISL_529138                                                                 | RSAL Dr. Ramelan Surabaya                                                                                                                                                        | Institute of Tropical Disease, Universitas Airlangga                                                                                                                                                             | Jezzy R Dewantari, Rima R Prasetya, Krisnadi Rahardjo, Adise W Nasiri, Radito Soesanto, Gatot Soegiarto, Laksni Wulandari, Retno A Setyoningrum, Resti Yudhawati, Yoiko K Shimizu, Mitsuhito Nishimura, Yasuko Mori, Soejipto, Kazuomi Shimizu, Maria Lusida                                                                                                                                                                                                                                                                                                                                                                                                                                                                                                                                                                               |
| EPI_ISL_529139                                                                 | Centro de Desenvolvimento Tecnológico em Saúde, Fundacao Oswaldo Cruz                                                                                                            | Centro de Desenvolvimento Tecnológico em Saúde, Fundacao Oswaldo Cruz                                                                                                                                            | Souza T.M., Fintelman-Rodrigues, N., De Paula A.D., Saraiva F.B., Ferreira M.A., Sacramento C.O., Medeiros M.A.                                                                                                                                                                                                                                                                                                                                                                                                                                                                                                                                                                                                                                                                                                                            |
| EPI_ISL_529140                                                                 | Centro de Desenvolvimento Tecnológico em Saúde, Fundacao Oswaldo Cruz                                                                                                            | Centro de Desenvolvimento Tecnológico em Saúde, Fundacao Oswaldo Cruz                                                                                                                                            | Souza T.M., Fintelman-Rodrigues, N., De Paula A.D., Saraiva F.B., Ferreira M.A., Sacramento C.O., Medeiros M.A.                                                                                                                                                                                                                                                                                                                                                                                                                                                                                                                                                                                                                                                                                                                            |
| EPI_ISL_529693                                                                 | Virology Department, Royal Infirmary of Edinburgh, NHS                                                                                                                           | COVID-19 Genomics UK (COG-UK) Consortium                                                                                                                                                                         | McHugh M, Dewar R, Rooke S, Gallagher M, Balceca C, O'Toole A, Scher E, Hill V, McCrone JT, Colquhoun R, Yu X, Jackson B, Rambaut A, Williams TC,                                                                                                                                                                                                                                                                                                                                                                                                                                                                                                                                                                                                                                                                                          |

|                                                                                                                                                |                                                                                                                                                         |                                                                                                   |                                                                                                                                                                                                                                                                                                                                                                                                                                                                                                                                                                                                                                                                                                              |
|------------------------------------------------------------------------------------------------------------------------------------------------|---------------------------------------------------------------------------------------------------------------------------------------------------------|---------------------------------------------------------------------------------------------------|--------------------------------------------------------------------------------------------------------------------------------------------------------------------------------------------------------------------------------------------------------------------------------------------------------------------------------------------------------------------------------------------------------------------------------------------------------------------------------------------------------------------------------------------------------------------------------------------------------------------------------------------------------------------------------------------------------------|
| EPI_ISL_529750, EPI_ISL_529753, EPI_ISL_529780                                                                                                 | Lothian / School of Biological Sciences, University of Edinburgh / Institute of Genetics and Molecular Medicine, University of Edinburgh<br>NHL-S-JALCH | KRISP, KZN Research Innovation and Sequencing Platform                                            | Templeton K                                                                                                                                                                                                                                                                                                                                                                                                                                                                                                                                                                                                                                                                                                  |
| EPI_ISL_529963                                                                                                                                 | Universitas Airlangga Hospital                                                                                                                          | Institute of Tropical Diseases, Universitas Airlangga                                             | Glandhari J, Pillay S, Lessells R, Middlese K, York D, Khan S, Tegally H, Wilkinson E, de Oliveira T                                                                                                                                                                                                                                                                                                                                                                                                                                                                                                                                                                                                         |
| EPI_ISL_529966                                                                                                                                 | RSUD Sidoarjo                                                                                                                                           | Institute of Tropical Disease, Universitas Airlangga                                              | Fina R, Prasetya, Krisnoadi Rahardjo, Afdise M Nasri, JeZZy R Dewantari, Nasronudin, Gato Soeparto, Laksmi Wulandari, Retno A Seyonimgunum, Resli Yudhantha, Yohko K Shimizu, Mishiro Nishimura, Yasuko Mori, Soejipto, Kazutumi Shimizu, Maria I Lusida                                                                                                                                                                                                                                                                                                                                                                                                                                                     |
| EPI_ISL_530088                                                                                                                                 | Hospital Universitario La Paz                                                                                                                           | Hospital Universitario La Paz                                                                     | Kazutumi Shimizu, Krisnadi Rahardjo, Afdise M Nasri, JeZZy R Dewantari, Fina R Prasetya, Alok Trawan, Gato Soeparto, Laksmi Wulandari, Retno A Seyonimgunum, Resli Yudhantha, Yohko K Shimizu, Mishiro Nishimura, Yasuko Mori, Soejipto, Maria I Lusida                                                                                                                                                                                                                                                                                                                                                                                                                                                      |
| EPI_ISL_530156                                                                                                                                 | Seattle Flu Study                                                                                                                                       | Seattle Flu Study                                                                                 | Maria Rodriguez, Elias Dahdoun, Sara Gonzalez, Fernando Lazaro, Esther Viehna, Natalia Stella, Julio Garcia, Juan Carlos Galán, Rafael Cantón, IM Dolores Fonguera, Rafael Delgado, Jesus Mingorance                                                                                                                                                                                                                                                                                                                                                                                                                                                                                                         |
| EPI_ISL_531233, EPI_ISL_531267, EPI_ISL_531776, EPI_ISL_532020, EPI_ISL_532109, EPI_ISL_532481, EPI_ISL_532536, EPI_ISL_532578, EPI_ISL_532582 | Lighthouse Lab in Glasgow                                                                                                                               | Wellcome Sanger Institute for the COVID-19 Genomics UK (COG-UK) consortium                        | Deborah A, Nickerson, Chris D, Frazer, Jover Lee, Benjamin Peile, Mathew Richardson, Amanda Adler, Elisabeth Brandstetter, Peter D, Han, Kaiarsen Fay, Misja Ilicsin, Kirsten Lacombe, Thomas R, Sibley, Melissa Truong, Caitlin R, Wolf, Karen Comwell, Stephanie Schrag, Jeff Duchin, Michaeli Boehch, Janet A, Englund, Michael Farnhale, Barry R, Lutz, Mark J, Rieder, Lea M, Starita, Matthew Thompson, Helen Y, Chu, Trevor Bedford, Jay Shendure                                                                                                                                                                                                                                                     |
| EPI_ISL_532674                                                                                                                                 | Lighthouse Lab in Glasgow                                                                                                                               | Wellcome Sanger Institute for the COVID-19 Genomics UK (COG-UK) consortium                        | Harper VanSteenhouse, Yurni Kasai, David K, Jackson, Ian Johnston, Dominic Kwiatkowski, Cordelia Langford, John Sillitoe                                                                                                                                                                                                                                                                                                                                                                                                                                                                                                                                                                                     |
| EPI_ISL_532791, EPI_ISL_532905                                                                                                                 | NHSGGC West of Scotland Specialist Virology Centre / MFC-University of Glasgow Centre for Virus Research                                                | Wellcome Sanger Institute for the COVID-19 Genomics UK (COG-UK) consortium                        | Ana da Silva Filipe, Nataasha Johnson, Kathy Smollett, Daniel Mair, Stephen Carmichael, Lily Tong, Jemma Nichols, Elinu Arandy-Cortes, Kirstyn Brunker, Yasmin Parr, Kyriaki Nomioku, Sarah McDonnell, Marc Niebel, Patavase Assamphan, Richard Orion, Joseph Hughes, Steenu Vaitipally, David L, Robertson, Alastair MacLean, Roy Gunsont, Kathy Li, Natasha Jesudason, Rajiv Shah, James Shephard, Antonia Ho, Alice Boos, Emma Thomson and Alex Alderton, Roberto Amato, Sonia Goncalves, Ewan Harrison, David K, Jackson, Ian Johnston, Dominic Kwiatkowski, Cordelia Langford, John Sillitoe                                                                                                            |
| EPI_ISL_532934, EPI_ISL_533234                                                                                                                 | Lighthouse Lab in Glasgow                                                                                                                               | Wellcome Sanger Institute for the COVID-19 Genomics UK (COG-UK) consortium                        | Harper VanSteenhouse, Yurni Kasai, David Gray, Carol Clugston, Anna Dominiczak and Alex Alderton, Roberto Amato, Sonia Goncalves, Ewan Harrison, David K, Jackson, Ian Johnston, Dominic Kwiatkowski, Cordelia Langford, John Sillitoe                                                                                                                                                                                                                                                                                                                                                                                                                                                                       |
| EPI_ISL_533237                                                                                                                                 | NHSGGC West of Scotland Specialist Virology Centre / MFC-University of Glasgow Centre for Virus Research                                                | Wellcome Sanger Institute for the COVID-19 Genomics UK (COG-UK) consortium                        | Ana da Silva Filipe, Nataasha Johnson, Kathy Smollett, Daniel Mair, Stephen Carmichael, Lily Tong, Jemma Nichols, Elinu Arandy-Cortes, Kirstyn Brunker, Yasmin Parr, Kyriaki Nomioku, Sarah McDonnell, Marc Niebel, Patavase Assamphan, Richard Orion, Joseph Hughes, Steenu Vaitipally, David L, Robertson, Alastair MacLean, Roy Gunsont, Kathy Li, Natasha Jesudason, Rajiv Shah, James Shephard, Antonia Ho, Alice Boos, Emma Thomson and Alex Alderton, Roberto Amato, Sonia Goncalves, Ewan Harrison, David K, Jackson, Ian Johnston, Dominic Kwiatkowski, Cordelia Langford, John Sillitoe                                                                                                            |
| EPI_ISL_533244, EPI_ISL_533245                                                                                                                 | Lighthouse Lab in Glasgow                                                                                                                               | Wellcome Sanger Institute for the COVID-19 Genomics UK (COG-UK) consortium                        | Harper VanSteenhouse, Yurni Kasai, David Gray, Carol Clugston, Anna Dominiczak and Alex Alderton, Roberto Amato, Sonia Goncalves, Ewan Harrison, David K, Jackson, Ian Johnston, Dominic Kwiatkowski, Cordelia Langford, John Sillitoe                                                                                                                                                                                                                                                                                                                                                                                                                                                                       |
| EPI_ISL_534201, EPI_ISL_534207                                                                                                                 | Central laboratorio                                                                                                                                     | Latvian Biomedical Research and Study Centre                                                      | Ivars Slamielis, Jins Plakoskis, Kaspars Megnis, Monika Ushnova, Iklia Zeliou, Via Rove, Stelja Lapina, Jana Ore, Maria Priedle, Uga Dumpis, Jins Kivis                                                                                                                                                                                                                                                                                                                                                                                                                                                                                                                                                      |
| EPI_ISL_534212                                                                                                                                 | E Gudbi Laboratorija                                                                                                                                    | Latvian Biomedical Research and Study Centre                                                      | Ivars Slamielis, Jins Plakoskis, Kaspars Megnis, Monika Ushnova, Iklia Zeliou, Via Rove, Mikus Gavars, Dmitrijs Perminovs, Uga Dumpis, Jins Kivis                                                                                                                                                                                                                                                                                                                                                                                                                                                                                                                                                            |
| EPI_ISL_534244                                                                                                                                 | Sundsvalls sjukhus                                                                                                                                      | The Public Health Agency of Sweden                                                                | Anna-Malin Linde, Maria Lund Karlberg, Mattias Haukeland, Reza Advari, Olov Startstam, Oskar Karlsson Lindqvist, Sandra Brodesson, Petra Edqvist, Mia Bryting, Anna Nisberg, Karin Tegmark-Wisell                                                                                                                                                                                                                                                                                                                                                                                                                                                                                                            |
| EPI_ISL_534312                                                                                                                                 | Districto Sanitario Sul                                                                                                                                 | Instituto Adolfo Lutz, Interdisciplinary Procedures Center, Strategic Laboratory                  | Claudio Travarres Saechi, Claudia Regina Goncalves, Erica Vallessa Ramos Gomes                                                                                                                                                                                                                                                                                                                                                                                                                                                                                                                                                                                                                               |
| EPI_ISL_534314                                                                                                                                 | Hospital Universitario da USP de SP                                                                                                                     | Instituto Adolfo Lutz, Interdisciplinary Procedures Center, Strategic Laboratory                  | Claudio Travarres Saechi, Claudia Regina Goncalves, Erica Vallessa Ramos Gomes                                                                                                                                                                                                                                                                                                                                                                                                                                                                                                                                                                                                                               |
| EPI_ISL_534315                                                                                                                                 | Serviço de Verificação de Óbitos SVO Guarulhos                                                                                                          | Instituto Adolfo Lutz, Interdisciplinary Procedures Center, Strategic Laboratory                  | Claudio Travarres Saechi, Claudia Regina Goncalves, Erica Vallessa Ramos Gomes                                                                                                                                                                                                                                                                                                                                                                                                                                                                                                                                                                                                                               |
| EPI_ISL_534316                                                                                                                                 | OS Mun Samana Lauro Ribas Braga                                                                                                                         | Instituto Adolfo Lutz, Interdisciplinary Procedures Center, Strategic Laboratory                  | Claudio Travarres Saechi, Claudia Regina Goncalves, Erica Vallessa Ramos Gomes                                                                                                                                                                                                                                                                                                                                                                                                                                                                                                                                                                                                                               |
| EPI_ISL_534317                                                                                                                                 | Hospital Geral de Itapevi                                                                                                                               | Instituto Adolfo Lutz, Interdisciplinary Procedures Center, Strategic Laboratory                  | Claudio Travarres Saechi, Claudia Regina Goncalves, Erica Vallessa Ramos Gomes                                                                                                                                                                                                                                                                                                                                                                                                                                                                                                                                                                                                                               |
| EPI_ISL_534318                                                                                                                                 | Hospital Municipal Antonio Giglio                                                                                                                       | Instituto Adolfo Lutz, Interdisciplinary Procedures Center, Strategic Laboratory                  | Claudio Travarres Saechi, Claudia Regina Goncalves, Erica Vallessa Ramos Gomes                                                                                                                                                                                                                                                                                                                                                                                                                                                                                                                                                                                                                               |
| EPI_ISL_534319, EPI_ISL_534320                                                                                                                 | Hospital do Serv. Pub. ESTAFCC Morato de Oliveira                                                                                                       | Instituto Adolfo Lutz, Interdisciplinary Procedures Center, Strategic Laboratory                  | Claudio Travarres Saechi, Claudia Regina Goncalves, Erica Vallessa Ramos Gomes                                                                                                                                                                                                                                                                                                                                                                                                                                                                                                                                                                                                                               |
| EPI_ISL_534321                                                                                                                                 | PS e Maternidade Nair-Fonseca Lettao Arantes                                                                                                            | Instituto Adolfo Lutz, Interdisciplinary Procedures Center, Strategic Laboratory                  | Claudio Travarres Saechi, Claudia Regina Goncalves, Erica Vallessa Ramos Gomes                                                                                                                                                                                                                                                                                                                                                                                                                                                                                                                                                                                                                               |
| EPI_ISL_534326                                                                                                                                 | Noite Dama Intermedica Saude AS                                                                                                                         | Instituto Adolfo Lutz, Interdisciplinary Procedures Center, Strategic Laboratory                  | Claudio Travarres Saechi, Claudia Regina Goncalves, Erica Vallessa Ramos Gomes                                                                                                                                                                                                                                                                                                                                                                                                                                                                                                                                                                                                                               |
| EPI_ISL_534336                                                                                                                                 | Department of Laboratory Medicine, National Taiwan University Hospital                                                                                  | Microbial Genomics Core Lab, National Taiwan University Centers of Genomic and Precision Medicine | Shou-Hwei Yeh, You-Yu Lin, Ya-Yun Lai, Chiao-Ling Li, Shan-Chwen Chang, Pei-Jer Chen, Suh-Yuan Chang                                                                                                                                                                                                                                                                                                                                                                                                                                                                                                                                                                                                         |
| EPI_ISL_534412, EPI_ISL_534419, EPI_ISL_534647                                                                                                 | NHSGGC West of Scotland Specialist Virology Centre / MFC-University of Glasgow Centre for Virus Research                                                | Wellcome Sanger Institute for the COVID-19 Genomics UK (COG-UK) consortium                        | Ana da Silva Filipe, Nataasha Johnson, Kathy Smollett, Daniel Mair, Stephen Carmichael, Lily Tong, Jemma Nichols, Elinu Arandy-Cortes, Kirstyn Brunker, Yasmin Parr, Kyriaki Nomioku, Sarah McDonnell, Marc Niebel, Patavase Assamphan, Richard Orion, Joseph Hughes, Steenu Vaitipally, David L, Robertson, Alastair MacLean, Roy Gunsont, Kathy Li, Natasha Jesudason, Rajiv Shah, James Shephard, Antonia Ho, Alice Boos, Emma Thomson and Alex Alderton, Roberto Amato, Sonia Goncalves, Ewan Harrison, David K, Jackson, Ian Johnston, Dominic Kwiatkowski, Cordelia Langford, John Sillitoe on behalf of the Wellcome Sanger Institute COVID-19 Surveillance team (http://www.sanger.ac.uk/ucsdv-team) |
| EPI_ISL_534833                                                                                                                                 | Oxford Virotics, NDM, University of Oxford; Oxford University Hospitals; Basinsgiate and North Hampshire Hospital                                       | COVID-19 Genomics UK (COG-UK) Consortium                                                          | Tanya Golubchik, David Bonsall, George McWhirer, Andy Tribes, Mairafersa de Cesari, Cathin Moore, Alex Mobbs, Amlu Justice, Robert Shaw, Monique Anderson, Timothy Peat, Emma Wise, Nathan Moore, Jessica Lynch, Nick Cortes, Matilde Mori, Stephen Kidd, David Buck, John Todd, Christophe Fraser                                                                                                                                                                                                                                                                                                                                                                                                           |
| EPI_ISL_535501                                                                                                                                 | NHL-S-JALCH                                                                                                                                             | KRISP, KZN Research Innovation and Sequencing Platform                                            | Glandhari J, Pillay S, Lessells R, Middlese K, York D, Khan S, Tegally H, Wilkinson E, de Oliveira T                                                                                                                                                                                                                                                                                                                                                                                                                                                                                                                                                                                                         |
| EPI_ISL_536411                                                                                                                                 | Medlines Molecular Laboratory                                                                                                                           | Medlines Molecular Laboratory                                                                     | Eric Chan, Winsome Wong, Jacqueline Tam, Isaac Chow                                                                                                                                                                                                                                                                                                                                                                                                                                                                                                                                                                                                                                                          |
| EPI_ISL_536421, EPI_ISL_536432                                                                                                                 | National Public Health Laboratory, National Centre for Infectious Diseases                                                                              | National Public Health Laboratory, National Centre for Infectious Diseases                        | Mak TM, Octavia S, Zhou Z, Cui L, Lin RTP                                                                                                                                                                                                                                                                                                                                                                                                                                                                                                                                                                                                                                                                    |



|                                                                                                |                                                                                                                                                                                               |                                                                                          |                                                                                                                                                                                                                                                                                                                                                                                                                                                                                    |
|------------------------------------------------------------------------------------------------|-----------------------------------------------------------------------------------------------------------------------------------------------------------------------------------------------|------------------------------------------------------------------------------------------|------------------------------------------------------------------------------------------------------------------------------------------------------------------------------------------------------------------------------------------------------------------------------------------------------------------------------------------------------------------------------------------------------------------------------------------------------------------------------------|
| EPI_ISL_536505                                                                                 | Instituto Nacional de Salud                                                                                                                                                                   | Laboratorio de Infecciones Respiratorias Ayudás                                          | Eduardo Juscanaya Lopez, David Trazona, Faviola Valdívía Guerrero, Nancy Rojas Serrano, Dennis Carhuarica, Larin Matuano Hernandez, Romie Gabilan Chavez                                                                                                                                                                                                                                                                                                                           |
| EPI_ISL_537065                                                                                 | Lighthouse Lab in Glasgow                                                                                                                                                                     | Wellcome Sanger Institute for the COVID-19 Genomics UK (COG-UK) consortium               | Harper VanSteenhouse, Yuni Kasai, David Gray, Carol Clugston, Anna Dominiczak and Alex Alderton, Roberto Amato, Sonia Gonçalves, Ewan Harrison, David K. Jackson, Ian Johnston, Dominic Kwiatkowski, Cordelia Langford, John Sillitoe on behalf of the Wellcome Sanger Institute COVID-19 Surveillance Team                                                                                                                                                                        |
| EPI_ISL_538504, EPI_ISL_538508                                                                 | National Institute of Health Research and Development                                                                                                                                         | National Institute of Health Research and Development                                    | Pawesti, HA, Shuangqi, Puspita, KD, Nugraha, AA, Ikawati, HD, Pangesti, KNA, Soekarno, T, Susilawati, NK, Hartasuli, NI, Nikmah, UA, Mursinah, Febriyani, A, Herman, R, Susanti, N, Herina, Ramadhany, R, Agustiningtish, Kurnawati, J, Kipuw, NL, Muna, F, Indralu, LI, Adani, K, Wibowo, HA, Rizki, A, Puspandary, N, Seiwardy, V.                                                                                                                                               |
| EPI_ISL_539368                                                                                 | Viollier AG                                                                                                                                                                                   | Department of Biosystems Science and Engineering, ETH Zurich                             | Christian Beisel, Sarah Nadeau, Ivan Topolitsky, Pedro Ferreira, Philipp Jablonksi, Susana Posada-Céspedes, Tobias Söthli, Ina Nissen, Natascia Santaroca, Elodie Burchlen, Christiane Beckmann, Maurice Redondo, Oliver Kobi, Christoph Noppin, Sophie Seidel, Nennine Santamaría de Souza, Nho Beerenwinktel, Tanja Stadler                                                                                                                                                      |
| EPI_ISL_539546, EPI_ISL_539547                                                                 | Hospital Clinic                                                                                                                                                                               | Instituto de Salud Carlos III                                                            | Iglesias-Caballero, M, Molinero Calamita, M, González-Espgullillas, M, Camarero, S, Pozo F, Casas, I, Jiménez, P, Jiménez, M, Zabalos, A, Monzon, S, Varona, S, Julia, M, Quesada, I, M, A, Marcos                                                                                                                                                                                                                                                                                 |
| EPI_ISL_539593, EPI_ISL_539596                                                                 | ZOTZ KLIMAS MNZ Dusseldorf-Centrum GBR UBAG für Labormedizin, Genetik, Zytologie, Pathologie                                                                                                  | Center of Medical Microbiology, Virology, and Hospital Hygiene, University of Dusseldorf | Maximilian Danneberg, Alexander Dillthey, Ashlee-Jane Dulleiss, Patrick Finzer, Karim Hofmann, Torsten Houwman, Malte Kohns Vasconcelos, Marek Kowencak, Nadine Lübke, Jessica Nicolai, Klaus Pflieger, Daniel Ströyer, Jörg Trimm, Andreas Walker, Tobias Wernemann, Rainer Zitz                                                                                                                                                                                                  |
| EPI_ISL_539618                                                                                 | CSIR-Centre for Cellular and Molecular Biology                                                                                                                                                | CSIR-Centre for Cellular and Molecular Biology                                           | Lanuk Zaveri, Shagufa Khan, Nikhil Hajirnis, M Soujanya Reddy, Prathusa Macocha, Namam Gaur, Sakshi Shanbhavi, Tulaa Nagabandi, Prusthotam Vootria, Pavei Mukherjee, Soha Banu, Priya Singh, Oshai Kulkarni, Divyja Vedagiri, Divya Gupta, Vishal San, Santosh Kumar Kurucha, Krishan Harinvas Harshan, Archana Bharadwaj Siva, Karthik Bharadwaj Talapakota,Zeba Rizvi, Zuberwasim Sayyad, Kekadee Aishwarya Anun, Anurutha H C, Aranga Ghosh, Rakesh K Mishra, Divya Tej Sowpati |
| EPI_ISL_539620                                                                                 | CSIR-Centre for Cellular and Molecular Biology                                                                                                                                                | CSIR-Centre for Cellular and Molecular Biology                                           | M Soujanya Reddy, Nikhil Hajirnis, Prathusa Macocha, Pavei Mukherjee, Soha Banu, Priya Singh, Oshai Kulkarni, Tulasi Nagabandi, Namam Gaur, Sakshi Shanbhavi, Lanuk Zaveri, Shagufa Khan, Prusthotam Vootria, Divyja Vedagiri, Divya Gupta, Vishal San, Santosh Kumar Kurucha, Krishan Harinvas Harshan, Archana Bharadwaj Siva, Karthik Bharadwaj Talapakota, Zeba Rizvi, Zuberwasim Sayyad, Kekadee Aishwarya Anun, Anurutha H C, Rakesh K Mishra, Divya Tej Sowpati             |
| EPI_ISL_539783, EPI_ISL_539784                                                                 | Universidad Regional Amazonica IKIAM                                                                                                                                                          | Institute of Microbiology, Universidad San Francisco de Quito                            | Fabian Aguilar, Katherine Apurte, Andrea Carrera, Nina Espinoza de los Monteros, Giovanna Moran, Marcelo Ortiz, Yanny Rojas, Sonia Silema, Carolina Psoano-Bolanos, Belén Prado-Vivar, Suliy Márquez, Juan José Guadalupe, Monica Becerra-Wong, Bernardo Gutiérrez, Verónica Barragán, Patricia Rojas-Silva, Gabriel Trueta, Michelle Guntauer, Paul Cardenas                                                                                                                      |
| EPI_ISL_539804                                                                                 | Yan Chai Hospital                                                                                                                                                                             | Hong Kong Department of Health                                                           | Afan K.L. Tsang, Peter C.W. Yip, Edman T.K. Lam, Rickjason C.W. Chan, Dominic N.C. Tsang                                                                                                                                                                                                                                                                                                                                                                                           |
| EPI_ISL_539811                                                                                 | Asisworld Expo Command Post                                                                                                                                                                   | Hong Kong Department of Health                                                           | Afan K.L. Tsang, Peter C.W. Yip, Edman T.K. Lam, Rickjason C.W. Chan, Dominic N.C. Tsang                                                                                                                                                                                                                                                                                                                                                                                           |
| EPI_ISL_540136, EPI_ISL_540420                                                                 | Lighthouse Lab in Glasgow                                                                                                                                                                     | Wellcome Sanger Institute for the COVID-19 Genomics UK (COG-UK) consortium               | Harper VanSteenhouse, Yuni Kasai, David Gray, Carol Clugston, Anna Dominiczak and Alex Alderton, Roberto Amato, Sonia Gonçalves, Ewan Harrison, David K. Jackson, Ian Johnston, Dominic Kwiatkowski, Cordelia Langford, John Sillitoe on behalf of the Wellcome Sanger Institute COVID-19 Surveillance Team                                                                                                                                                                        |
| EPI_ISL_540448                                                                                 | University of Liège COVID-19 testing center                                                                                                                                                   | GIGA Medical Genomics                                                                    | Keith Durkin, Maria Aresi, Emmanuel André, Marc Van Ranst, Fabrice Bureau, Laurent Gillet, Wolter Coppeliers, Vincent Bours                                                                                                                                                                                                                                                                                                                                                        |
| EPI_ISL_540507, EPI_ISL_540565                                                                 | Department of Clinical Microbiology                                                                                                                                                           | GIGA Medical Genomics                                                                    | Keith Durkin, Maria Aresi, Sébastien Bortems, Raphaël Boreux, Bouctra Boujemla, Céleste Meek, Axelle Chastelin, Céline Fombeilla-Lopez, Pierrette Mehn, Marie-Pierre Heyette, Vincent Bours                                                                                                                                                                                                                                                                                        |
| EPI_ISL_540892                                                                                 | Virology Department, Royal Infirmary of Edinburgh, NHS Lothian, School of Biological Sciences, University of Edinburgh, Institute of Genomics and Molecular Medicine, University of Edinburgh | COVID-19 Genomics UK (COG-UK) Consortium                                                 | Mchugh M, Dewar R, Rode S, Gallagher M, Balceza C, O'Toole A, Spath E, Hill Y, McCrone JT, Colquhoun R, Yu X, Jackson B, Rambaut A, Williams TC, Templeton K                                                                                                                                                                                                                                                                                                                       |
| EPI_ISL_540901                                                                                 | Wales Specialist Virology Centre Sequencing lab: Pathogen Genomics Unit                                                                                                                       | COVID-19 Genomics UK (COG-UK) Consortium                                                 | Catherine Moore, Johnathan Evans, Laura Gifford, Malorie Perry, Simon Cottrell, Angela Marchbank, Alec Burchley, Alexander Adams, Amy Gasikin, Bree Gatica-Wilcox, Jason Combes, Joel Souqigata, Lauren Gilbert, Lee Graham, Nicole Pascohan, Sara Kunzzen-Sumnerhayes, Sarah Taylor, Sophie Jones, Sara Ray, Matthew Bull, Joanne Watkins, Sally Connor                                                                                                                           |
| EPI_ISL_540929, EPI_ISL_540959                                                                 | Laboratorio de Referencia Nacional de Virus Respiratorios, Instituto Nacional de Salud Peru                                                                                                   | Laboratorio de Genética Microbiana, Universidad Peruana Cayetano Heredia                 | Pablo Tsukayama, Alejandra Davila-Barclay, Luis González, Pedro E. Romero, Brenda Avizora, Janet Huancantrouque, Pool Marcos, Maribel Huaringa, Camila Castillo-Vilcahuamani, Guillermo Salvatierra                                                                                                                                                                                                                                                                                |
| EPI_ISL_541082                                                                                 | The National Institute of Public Health                                                                                                                                                       | State Veterinary Institute Prague                                                        | Nagy A., Jimrova, H, Novakova, L., Trnka, D., Veeceva, J                                                                                                                                                                                                                                                                                                                                                                                                                           |
| EPI_ISL_541332, EPI_ISL_541333                                                                 | The National Institute of Public Health                                                                                                                                                       | State Veterinary Institute Prague                                                        | Christian Beisel, Sarah Nadeau, Ivan Topolitsky, Pedro Ferreira, Philipp Jablonksi, Susana Posada-Céspedes, Tobias Söthli, Ina Nissen, Natascia Santaroca, Elodie Burchlen, Christiane Beckmann, Maurice Redondo, Oliver Kobi, Christoph Noppin, Sophie Seidel, Nennine Santamaría de Souza, Nho Beerenwinktel, Tanja Stadler                                                                                                                                                      |
| EPI_ISL_541538                                                                                 | Viollier AG                                                                                                                                                                                   | Department of Biosystems Science and Engineering, ETH Zurich                             | Vidranovic, D., Tesovic, B., Knezevic, A., Jovanovic, T., Jankovic, M., Sekler, M., Banovic Djen, B., Volkening, J., Alonso, C., Petrovic, T., Poldar, V                                                                                                                                                                                                                                                                                                                           |
| EPI_ISL_541650, EPI_ISL_541653                                                                 | Laboratory Diagnostic, Veterinary Specialized Institute Kraljevo                                                                                                                              | Laboratory Diagnostic, Veterinary Specialized Institute Kraljevo                         | Harper VanSteenhouse, Yuni Kasai, David Gray, Carol Clugston, Anna Dominiczak and Alex Alderton, Roberto Amato, Sonia Gonçalves, Ewan Harrison, David K. Jackson, Ian Johnston, Dominic Kwiatkowski, Cordelia Langford, John Sillitoe on behalf of the Wellcome Sanger Institute COVID-19 Surveillance Team                                                                                                                                                                        |
| EPI_ISL_541684, EPI_ISL_541715, EPI_ISL_541720, EPI_ISL_541751                                 | National Institute of Virology, NIV Influenza                                                                                                                                                 | National Institute of Virology, NIV Influenza                                            | Laura Perez-Lago, Maria Herranz, Jon Sicilia, Julia Suárez, Pilar Catalán, Patricia Muñoz, Dario Garcia de Viedra and SeqCOVID-SPAIN consortium                                                                                                                                                                                                                                                                                                                                    |
| EPI_ISL_541807, EPI_ISL_541808                                                                 | Lighthouse Lab in Glasgow                                                                                                                                                                     | Wellcome Sanger Institute for the COVID-19 Genomics UK (COG-UK) consortium               | Harper VanSteenhouse, Yuni Kasai, David Gray, Carol Clugston, Anna Dominiczak and Alex Alderton, Roberto Amato, Sonia Gonçalves, Ewan Harrison, David K. Jackson, Ian Johnston, Dominic Kwiatkowski, Cordelia Langford, John Sillitoe on behalf of the Wellcome Sanger Institute COVID-19 Surveillance Team                                                                                                                                                                        |
| EPI_ISL_541868, EPI_ISL_541892, EPI_ISL_541906, EPI_ISL_541928, EPI_ISL_541936, EPI_ISL_541941 | Hospital General Universitario Gregorio Marañón                                                                                                                                               | SeqCOVID-SPAIN consortium (BIV/COSIC)                                                    | S. Wesley Long, Randall J. Olsen, Paul A. Christensen, David W. Bernard, James J. Davis, Maulik Shukla, Marcus Nguyen, Matthew Ojeda Saavedra, Concepcion C. Cantu, Prasanti Yerramilli, Layne Pruitt, Sisir S. Bhedi, Hung Che Kuo, Heather Hendrickson, Ghazalyn Ekander, Hoang A. T. Nguyen, J. Hunter Long, Muthiah Kumaraswami, Julie Gojke, Daniel Butz, Jimmy Gollfar, Jason S. McEllian, Chia-Wai Chou, Kamyab Javannardi, Ilya J. Finkelshten, and James M. Musser        |
| EPI_ISL_544138, EPI_ISL_545484                                                                 | Houston Methodist Hospital                                                                                                                                                                    | Houston Methodist Hospital                                                               | Nagy A., Jimrova, H, Novakova, L., Trnka, D., Veeceva, J                                                                                                                                                                                                                                                                                                                                                                                                                           |
| EPI_ISL_547571                                                                                 | Hospital Municipal Antonio Gíglio                                                                                                                                                             | Instituto Adolfo Lutz, Interdisciplinary Procedures Center, Strategic Laboratory         | Claudio Tavares Sacchi, Claudia Regina Gonçalves, Erica Valessa Ramos Gomes, Karoline Rodrigues Campos                                                                                                                                                                                                                                                                                                                                                                             |
| EPI_ISL_547573                                                                                 | Vigilância em Saúde de Cajamar                                                                                                                                                                | Instituto Adolfo Lutz, Interdisciplinary Procedures Center, Strategic Laboratory         | Claudio Tavares Sacchi, Claudia Regina Gonçalves, Erica Valessa Ramos Gomes, Karoline Rodrigues Campos                                                                                                                                                                                                                                                                                                                                                                             |
| EPI_ISL_547574                                                                                 | Hospital Universitario da USP                                                                                                                                                                 | Instituto Adolfo Lutz, Interdisciplinary Procedures Center, Strategic Laboratory         | Claudio Tavares Sacchi, Claudia Regina Gonçalves, Erica Valessa Ramos Gomes, Karoline Rodrigues Campos                                                                                                                                                                                                                                                                                                                                                                             |
| EPI_ISL_547575                                                                                 | SVO Jundiaí                                                                                                                                                                                   | Instituto Adolfo Lutz, Interdisciplinary Procedures Center, Strategic Laboratory         | Claudio Tavares Sacchi, Claudia Regina Gonçalves, Erica Valessa Ramos Gomes, Karoline Rodrigues Campos                                                                                                                                                                                                                                                                                                                                                                             |
| EPI_ISL_546436, EPI_ISL_546935                                                                 | The National Institute of Public Health                                                                                                                                                       | State Veterinary Institute Prague                                                        | Nagy A., Jimrova, H, Novakova, L., Trnka, D., Veeceva, J                                                                                                                                                                                                                                                                                                                                                                                                                           |
| EPI_ISL_547438, EPI_ISL_547436, EPI_ISL_547438, EPI_ISL_547444                                 | Microbiology, Department of Pathology, St. Bernard's Hospital, Gibraltar Health Authority                                                                                                     | Respiratory Virus Unit, Microbiology Services Colindale, Public Health England           | PHE Covid Sequencing Team, Dr Nicholas Cortes (Gibraltar), Charlotte Gilborn-Jones (Gibraltar)                                                                                                                                                                                                                                                                                                                                                                                     |

|                                |                                                                                                                    |                                                                                                           |                                                                                                                                                                                                                                                                                                                                                                                                                                                                                                                                                                                 |
|--------------------------------|--------------------------------------------------------------------------------------------------------------------|-----------------------------------------------------------------------------------------------------------|---------------------------------------------------------------------------------------------------------------------------------------------------------------------------------------------------------------------------------------------------------------------------------------------------------------------------------------------------------------------------------------------------------------------------------------------------------------------------------------------------------------------------------------------------------------------------------|
| EPI_ISL_547576                 | Secretaria Municipal de Saude                                                                                      | Instituto Adolfo Lutz, Interdisciplinary Procedures Center, Strategic Laboratory                          | Claudio Tavares Sacchi, Claudia Regina Gonçalves, Erica Valessa Ramos Gomes, Karoline Rodrigues Campos                                                                                                                                                                                                                                                                                                                                                                                                                                                                          |
| EPI_ISL_547577                 | Hospital e Maternidade Nossa Senhora das Graças                                                                    | Instituto Adolfo Lutz, Interdisciplinary Procedures Center, Strategic Laboratory                          | Claudio Tavares Sacchi, Claudia Regina Gonçalves, Erica Valessa Ramos Gomes, Karoline Rodrigues Campos                                                                                                                                                                                                                                                                                                                                                                                                                                                                          |
| EPI_ISL_547578                 | Hospital Doutor Domingos Leonardo Cerávolo                                                                         | Instituto Adolfo Lutz, Interdisciplinary Procedures Center, Strategic Laboratory                          | Claudio Tavares Sacchi, Claudia Regina Gonçalves, Erica Valessa Ramos Gomes, Karoline Rodrigues Campos                                                                                                                                                                                                                                                                                                                                                                                                                                                                          |
| EPI_ISL_547579                 | Santa Casa de Misericórdia de Aracatuba                                                                            | Instituto Adolfo Lutz, Interdisciplinary Procedures Center, Strategic Laboratory                          | Claudio Tavares Sacchi, Claudia Regina Gonçalves, Erica Valessa Ramos Gomes, Karoline Rodrigues Campos                                                                                                                                                                                                                                                                                                                                                                                                                                                                          |
| EPI_ISL_547580                 | Santa Casa da Misericórdia de Presidente Prudente                                                                  | Instituto Adolfo Lutz, Interdisciplinary Procedures Center, Strategic Laboratory                          | Claudio Tavares Sacchi, Claudia Regina Gonçalves, Erica Valessa Ramos Gomes, Karoline Rodrigues Campos                                                                                                                                                                                                                                                                                                                                                                                                                                                                          |
| EPI_ISL_547849                 | Gundaresen Molecular Diagnostics Laboratory                                                                        | Kabara Cancer Research Institute                                                                          | Craig S. Richmond, Paracé A Kenny                                                                                                                                                                                                                                                                                                                                                                                                                                                                                                                                               |
| EPI_ISL_547923, EPI_ISL_547942 | Laboratório de Infecções Respiratórias Agudas Centro Nacional de Saúd Pública, Instituto Nacional de Saúd          | Laboratório de Infecções Respiratórias Agudas Centro Nacional de Saúd Pública, Instituto Nacional de Saúd | Juscemayra E.                                                                                                                                                                                                                                                                                                                                                                                                                                                                                                                                                                   |
| EPI_ISL_547977                 | LabTasis                                                                                                           | Institute of Environmental Science and Research (ESR)                                                     |                                                                                                                                                                                                                                                                                                                                                                                                                                                                                                                                                                                 |
| EPI_ISL_547978, EPI_ISL_548021 | LabPILLS                                                                                                           | Institute of Environmental Science and Research (ESR)                                                     |                                                                                                                                                                                                                                                                                                                                                                                                                                                                                                                                                                                 |
| EPI_ISL_548067, EPI_ISL_548075 | North Shore Hospital                                                                                               | Institute of Environmental Science and Research (ESR)                                                     | Xiaoyun Ren, Matt Storey, Nikki Freed, Muhammad Faisal, Jing Wang, Hernes Perez, Anja Werno, Antje van der Linden, Ario Upton, Chris Mansell, David Hammer, Dragana Drnkovic, Gary McAuliffe, Hana Sofia Andersson, James Usher, Jill Sherwood, Josh Freeman, Julia Howard, Juliet Ely, Mary Dalmeida, Matt Blakiston, Matthew Rogers, Max Bloomfield, Michele Bain, Sally Roberts, Sarah Jeliferes, Sharnni Muliyil, Susan Morpeth, Susan Taylor, Timothy Blackmore, Vani Sathiyendran, Veronica Payne, Virginia Hope, Erasmus Smit, Lauren Jely, Olin Stlander, Joep de Light |
| EPI_ISL_548104                 | LabTasis                                                                                                           | Institute of Environmental Science and Research (ESR)                                                     | Xiaoyun Ren, Matt Storey, Nikki Freed, Muhammad Faisal, Jing Wang, Hernes Perez, Anja Werno, Antje van der Linden, Ario Upton, Chris Mansell, David Hammer, Dragana Drnkovic, Gary McAuliffe, Hana Sofia Andersson, James Usher, Jill Sherwood, Josh Freeman, Julia Howard, Juliet Ely, Mary Dalmeida, Matt Blakiston, Matthew Rogers, Max Bloomfield, Michele Bain, Sally Roberts, Sarah Jeliferes, Sharnni Muliyil, Susan Morpeth, Susan Taylor, Timothy Blackmore, Vani Sathiyendran, Veronica Payne, Virginia Hope, Erasmus Smit, Lauren Jely, Olin Stlander, Joep de Light |
| EPI_ISL_548132                 | Middlemore Hospital                                                                                                | Institute of Environmental Science and Research (ESR)                                                     | Xiaoyun Ren, Matt Storey, Nikki Freed, Muhammad Faisal, Jing Wang, Hernes Perez, Anja Werno, Antje van der Linden, Ario Upton, Chris Mansell, David Hammer, Dragana Drnkovic, Gary McAuliffe, Hana Sofia Andersson, James Usher, Jill Sherwood, Josh Freeman, Julia Howard, Juliet Ely, Mary Dalmeida, Matt Blakiston, Matthew Rogers, Max Bloomfield, Michele Bain, Sally Roberts, Sarah Jeliferes, Sharnni Muliyil, Susan Morpeth, Susan Taylor, Timothy Blackmore, Vani Sathiyendran, Veronica Payne, Virginia Hope, Erasmus Smit, Lauren Jely, Olin Stlander, Joep de Light |
| EPI_ISL_548139, EPI_ISL_548140 | Canterbury Health Laboratories                                                                                     | Institute of Environmental Science and Research (ESR)                                                     | Xiaoyun Ren, Matt Storey, Nikki Freed, Muhammad Faisal, Jing Wang, Hernes Perez, Anja Werno, Antje van der Linden, Ario Upton, Chris Mansell, David Hammer, Dragana Drnkovic, Gary McAuliffe, Hana Sofia Andersson, James Usher, Jill Sherwood, Josh Freeman, Julia Howard, Juliet Ely, Mary Dalmeida, Matt Blakiston, Matthew Rogers, Max Bloomfield, Michele Bain, Sally Roberts, Sarah Jeliferes, Sharnni Muliyil, Susan Morpeth, Susan Taylor, Timothy Blackmore, Vani Sathiyendran, Veronica Payne, Virginia Hope, Erasmus Smit, Lauren Jely, Olin Stlander, Joep de Light |
| EPI_ISL_548395                 | County of Santa Clara Public Health Department                                                                     | Chan-Zuckerberg Biobub                                                                                    | Yaqub T. Nawaz, M. Alim A., Alati I., Raza S., Shabibr, M.A., Ashraf, M.A., Aziz, S.Z., Cheema, S.O., Shan, M.B., Hassana, S., Raffique, S., Sardar, N., Mehmood, A., Aziz, M.W., Fazal, S., Khan, N., Khan, M., Altiq, M.M., Asif, A., Anwar, M., Awan, N.A., Younis, M.U., Bhatti, M.A., Tahir, Z., Mukhtar, N., Sarwar, H., Rana, M.S., Shabibr, M.Z.                                                                                                                                                                                                                        |
| EPI_ISL_548942                 | Institute of Microbiology, University of Veterinary and Animal sciences                                            | Institute of Microbiology, University of Veterinary and Animal sciences                                   | Mak TM, Octavia S, Zhou Z, Cui L, Lin RTP                                                                                                                                                                                                                                                                                                                                                                                                                                                                                                                                       |
| EPI_ISL_548974                 | National Public Health Laboratory, National Centre for Infectious Diseases                                         | National Public Health Laboratory, National Centre for Infectious Diseases                                |                                                                                                                                                                                                                                                                                                                                                                                                                                                                                                                                                                                 |
| EPI_ISL_549043                 | Ostfold Hospital Trust - Kales, Centre for Laboratory Medicine, Section for gene technology and infection serology | Norwegian Institute of Public Health, Department of Virology                                              | Kathrine Stene-Johansen, Kamilla Heddeland Insetjord, Hilde Eishaug, Rasmus Flis Koppend, Hilde Synneve Volian, Karoline Bragstad, Olav Hugnres                                                                                                                                                                                                                                                                                                                                                                                                                                 |
| EPI_ISL_549049, EPI_ISL_549064 | Furst Medical Laboratory                                                                                           | Norwegian Institute of Public Health, Department of Virology                                              | Kathrine Stene-Johansen, Kamilla Heddeland Insetjord, Hilde Eishaug, Rasmus Flis Koppend, Hilde Synneve Volian, Karoline Bragstad, Olav Hugnres                                                                                                                                                                                                                                                                                                                                                                                                                                 |
| EPI_ISL_549092, EPI_ISL_549093 | Ostfold Hospital Trust - Kales, Centre for Laboratory Medicine, Section for gene technology and infection serology | Norwegian Institute of Public Health, Department of Virology                                              | Kathrine Stene-Johansen, Kamilla Heddeland Insetjord, Hilde Eishaug, Rasmus Flis Koppend, Hilde Synneve Volian, Karoline Bragstad, Olav Hugnres                                                                                                                                                                                                                                                                                                                                                                                                                                 |
| EPI_ISL_549173                 | Vestfold Hospital, Toensberg Department of Microbiology                                                            | Norwegian Institute of Public Health, Department of Virology                                              | Kathrine Stene-Johansen, Kamilla Heddeland Insetjord, Hilde Eishaug, Rasmus Flis Koppend, Hilde Synneve Volian, Karoline Bragstad, Olav Hugnres                                                                                                                                                                                                                                                                                                                                                                                                                                 |
| EPI_ISL_551213                 | Lighthouse Lab in Milton Keynes                                                                                    | Wellcome Sanger Institute for the COVID-19 Genomics UK (COG-UK) consortium                                | The Lighthouse Lab in Milton Keynes and Alex Aderton, Roberto Arato, Sonia Gonçalves, Ewan Harrison, David K. Jackson, Ian Johnston, Dominic Kwiatkowski, Cordelia Langford, John Sillitoe on behalf of the Wellcome Sanger Institute COVID-19 Surveillance Team (http://www.sanger.ac.uk/covid-team)                                                                                                                                                                                                                                                                           |
| EPI_ISL_551263                 | Lighthouse Lab in Milton Keynes                                                                                    | Wellcome Sanger Institute for the COVID-19 Genomics UK (COG-UK) consortium                                | The Lighthouse Lab in Milton Keynes and Alex Aderton, Roberto Arato, Sonia Gonçalves, Ewan Harrison, David K. Jackson, Ian Johnston, Dominic Kwiatkowski, Cordelia Langford, John Sillitoe on behalf of the Wellcome Sanger Institute COVID-19 Surveillance Team (http://www.sanger.ac.uk/covid-team)                                                                                                                                                                                                                                                                           |
| EPI_ISL_552664                 | Lighthouse Lab in Milton Keynes                                                                                    | Wellcome Sanger Institute for the COVID-19 Genomics UK (COG-UK) consortium                                | The Lighthouse Lab in Milton Keynes and Alex Aderton, Roberto Arato, Sonia Gonçalves, Ewan Harrison, David K. Jackson, Ian Johnston, Dominic Kwiatkowski, Cordelia Langford, John Sillitoe on behalf of the Wellcome Sanger Institute COVID-19 Surveillance Team (http://www.sanger.ac.uk/covid-team)                                                                                                                                                                                                                                                                           |
| EPI_ISL_552669, EPI_ISL_553980 | Lighthouse Lab in Alderley Park                                                                                    | Wellcome Sanger Institute for the COVID-19 Genomics UK (COG-UK) consortium                                | The Lighthouse Lab in Alderley Park and Alex Aderton, Roberto Arato, Sonia Gonçalves, Ewan Harrison, David K. Jackson, Ian Johnston, Dominic Kwiatkowski, Cordelia Langford, John Sillitoe on behalf of the Wellcome Sanger Institute COVID-19 Surveillance Team (http://www.sanger.ac.uk/covid-team)                                                                                                                                                                                                                                                                           |
| EPI_ISL_556110                 | Lighthouse Lab in Alderley Park                                                                                    | Wellcome Sanger Institute for the COVID-19 Genomics UK (COG-UK) consortium                                | The Lighthouse Lab in Alderley Park and Alex Aderton, Roberto Arato, Sonia Gonçalves, Ewan Harrison, David K. Jackson, Ian Johnston, Dominic Kwiatkowski, Cordelia Langford, John Sillitoe on behalf of the Wellcome Sanger Institute COVID-19 Surveillance Team (http://www.sanger.ac.uk/covid-team)                                                                                                                                                                                                                                                                           |
| EPI_ISL_556126                 | Lighthouse Lab in Milton Keynes                                                                                    | Wellcome Sanger Institute for the COVID-19 Genomics UK (COG-UK) consortium                                | The Lighthouse Lab in Milton Keynes and Alex Aderton, Roberto Arato, Sonia Gonçalves, Ewan Harrison, David K. Jackson, Ian Johnston, Dominic Kwiatkowski, Cordelia Langford, John Sillitoe on behalf of the Wellcome Sanger Institute COVID-19 Surveillance Team (http://www.sanger.ac.uk/covid-team)                                                                                                                                                                                                                                                                           |
| EPI_ISL_557977                 | Lighthouse Lab in Milton Keynes                                                                                    | Wellcome Sanger Institute for the COVID-19 Genomics UK (COG-UK) consortium                                | The Lighthouse Lab in Alderley Park and Alex Aderton, Roberto Arato, Sonia Gonçalves, Ewan Harrison, David K. Jackson, Ian Johnston, Dominic Kwiatkowski, Cordelia Langford, John Sillitoe on behalf of the Wellcome Sanger Institute COVID-19 Surveillance Team (http://www.sanger.ac.uk/covid-team)                                                                                                                                                                                                                                                                           |
| EPI_ISL_558681, EPI_ISL_558753 | Lighthouse Lab in Alderley Park                                                                                    | Wellcome Sanger Institute for the COVID-19 Genomics UK (COG-UK) consortium                                | The Lighthouse Lab in Alderley Park, and Alex Aderton, Roberto Arato, Sonia Gonçalves, Ewan Harrison, David K. Jackson, Ian Johnston, Dominic Kwiatkowski, Cordelia Langford, John Sillitoe on behalf of the Wellcome Sanger Institute COVID-19 Surveillance Team (http://www.sanger.ac.uk/covid-team)                                                                                                                                                                                                                                                                          |

|                                                                                                                                                                                |                                                                                                                                                                                    |                                                                                                                         |                                                                                                                                                                                                                                                                                                                                                                                                                                                                                                                                                                                                                                                                                                                                                                                                                                                         |
|--------------------------------------------------------------------------------------------------------------------------------------------------------------------------------|------------------------------------------------------------------------------------------------------------------------------------------------------------------------------------|-------------------------------------------------------------------------------------------------------------------------|---------------------------------------------------------------------------------------------------------------------------------------------------------------------------------------------------------------------------------------------------------------------------------------------------------------------------------------------------------------------------------------------------------------------------------------------------------------------------------------------------------------------------------------------------------------------------------------------------------------------------------------------------------------------------------------------------------------------------------------------------------------------------------------------------------------------------------------------------------|
| EPI_ISL_559927                                                                                                                                                                 | Virology Department, Sheffield Teaching Hospitals NHS Foundation Trust/D department of Infection, Immunity and Cardiovascular Disease, The Medical School, University of Sheffield | COVID-19 Genomics UK (COG-UK) Consortium                                                                                | Thushan de Silva, Matthew Parker, Nikki Smith, Adri Anygal, Rebecca Brown, Luke Green, Rachel Tucker, Paul Parsons, Danielle Groves, Katie Johnson, Laura Carriero, Alex Keeley, Dave Partridge, Matthew Wyles, Benjamin Lindsey, Mehmet Yavuz, Mohammad Raza, Catlad Evans                                                                                                                                                                                                                                                                                                                                                                                                                                                                                                                                                                             |
| EPI_ISL_559995, EPI_ISL_560006                                                                                                                                                 | Oxford Viroemics, NDM, University of Oxford, Oxford University Hospitals, Baslington and North Hampshire Hospital                                                                  | COVID-19 Genomics UK (COG-UK) Consortium                                                                                | Tanya Goldschik, David Bonnell, George MacIntyre, Amy Trebes, Mariateresa de Cesare, Cathrín Moore, Alex Mobbs, Anita Justica, Robert Shaw, Monique Andersson, Timothy Peio, Emma Wise, Nathan Moore, Jessica Lynch, Nick Cortes, Mallice Mori, Stephen Kidd, David Black, John Todd, Christophe Fraser                                                                                                                                                                                                                                                                                                                                                                                                                                                                                                                                                 |
| EPI_ISL_560401, EPI_ISL_560405                                                                                                                                                 | Virusus University Hospital Smaragos Mikikos, Virusus University                                                                                                                   | Institute of Biotechnology, Life Sciences Center, Vilnius University and Thermo Fisher Scientific                       | Justinas Sikas, Albertas Trimintas, Alma Gedvilaitė, Aurelijus Zvirblienas, Danieli Naumovas, Laimonas Girkščevičius, Ligita Janciorienė, Mirindaugas Paulauskas                                                                                                                                                                                                                                                                                                                                                                                                                                                                                                                                                                                                                                                                                        |
| EPI_ISL_560477                                                                                                                                                                 | Voivler AG                                                                                                                                                                         | Department of Biosystems Science and Engineering, ETH Zurich                                                            | Christian Beisel, Sarah Nadeau, Van Topolsky, Pedro Ferreira, Philipp Jablonksi, Susana Posada-Céspedes, Tobias Schär, Ina Nissen, Natascia Santacrose, Elodie Burcklen, Christiane Beckmann, Maurice Redondo, Olivier Kobel, Christoph Noppen, Sophie Seidel, Noemie Santamania de Souza, Niko Beerenwinkel, Tanja Stadler                                                                                                                                                                                                                                                                                                                                                                                                                                                                                                                             |
| EPI_ISL_560600, EPI_ISL_560636, EPI_ISL_560645                                                                                                                                 | Hospital                                                                                                                                                                           | National Reference Center for Viruses of Respiratory Infections, Institut Pasteur, Paris                                | Sylvie Bevilhvi, Fabiana Garbato, Elienne Simon-Loriolle, Vincent Enouf, Maud Vanpeene, Sylvie van der Werf                                                                                                                                                                                                                                                                                                                                                                                                                                                                                                                                                                                                                                                                                                                                             |
| EPI_ISL_560797                                                                                                                                                                 | Mayo Clinic & Mayo Clinic Laboratories                                                                                                                                             | Minnesota Department of Health, Public Health Laboratory                                                                | Mat Plumb, Jacob Garfin, and Xiong Wang                                                                                                                                                                                                                                                                                                                                                                                                                                                                                                                                                                                                                                                                                                                                                                                                                 |
| EPI_ISL_560978                                                                                                                                                                 | Universitätsklinikum   Linköping                                                                                                                                                   | The Public Health Agency of Sweden                                                                                      | Anna-Malin Linde, Maria Lird Karlberg, Mattias Haukland, Reza Advari, Olov Svartström, Oskar Karlsson Lindso, Sandra Brodesson, Petra Edquist, Mia Bryting, Anna Håberg, Karin Tegmark-Wisell                                                                                                                                                                                                                                                                                                                                                                                                                                                                                                                                                                                                                                                           |
| EPI_ISL_560981                                                                                                                                                                 | Capio St Gorans sjukhus                                                                                                                                                            | The Public Health Agency of Sweden                                                                                      | Anna-Malin Linde, Maria Lird Karlberg, Mattias Haukland, Reza Advari, Olov Svartström, Oskar Karlsson Lindso, Sandra Brodesson, Petra Edquist, Mia Bryting, Anna Håberg, Karin Tegmark-Wisell                                                                                                                                                                                                                                                                                                                                                                                                                                                                                                                                                                                                                                                           |
| EPI_ISL_560992                                                                                                                                                                 | Karolinska universitetislaboratoriet SOLNA                                                                                                                                         | The Public Health Agency of Sweden                                                                                      | Anna-Malin Linde, Maria Lird Karlberg, Mattias Haukland, Reza Advari, Olov Svartström, Oskar Karlsson Lindso, Sandra Brodesson, Petra Edquist, Mia Bryting, Anna Håberg, Karin Tegmark-Wisell                                                                                                                                                                                                                                                                                                                                                                                                                                                                                                                                                                                                                                                           |
| see above                                                                                                                                                                      | MRCG at LSHTM Genomics lab                                                                                                                                                         | MRCG at LSHTM Genomics lab                                                                                              | Abdul Karim sesay, Abdoulie Kanteh, Jarna Marneth, Mariana Kujaibi, Bakary Sanyang Seemann, T., Schultz M. B., Sait, M., Sherry, N.                                                                                                                                                                                                                                                                                                                                                                                                                                                                                                                                                                                                                                                                                                                     |
| EPI_ISL_561021, EPI_ISL_561034, EPI_ISL_561038, EPI_ISL_561040, EPI_ISL_561213, EPI_ISL_561238, EPI_ISL_561241, EPI_ISL_561283, EPI_ISL_561285, EPI_ISL_561288, EPI_ISL_561304 | Microbiological Diagnostic Unit - Public Health Laboratory (MDU-PHL)                                                                                                               | MDU-PHL                                                                                                                 |                                                                                                                                                                                                                                                                                                                                                                                                                                                                                                                                                                                                                                                                                                                                                                                                                                                         |
| EPI_ISL_563279, EPI_ISL_563296, EPI_ISL_563298, EPI_ISL_563348, EPI_ISL_563357, EPI_ISL_563736, EPI_ISL_564668                                                                 | Laboratorio de Referencia Nacional de Virus Respiratorios, Instituto Nacional de Salud Peru                                                                                        | Laboratorio de Genómica Microbiana, Universidad Peruana Cayetano Heredia                                                | Pablo Tsukayama, Alejandra Dávila-Barclay, Luis González, Pedro E. Romero, Brenda Ayzano, Janet Huancabonque, Pool Marcos, Mariel Huaringa, Filasiza A Yudiapurri, Edison Johar, Hidayat Triansanto, Iskandar A Adnan, Willy Augustine, David H Muljono, Safarina G Malik, Herwati Sudoyo, Khin Saw Myint, Amin Soebandiro                                                                                                                                                                                                                                                                                                                                                                                                                                                                                                                              |
| EPI_ISL_568518                                                                                                                                                                 | RSLSP Farmawati                                                                                                                                                                    | Elkman Institute for Molecular Biology, Ministry of Research and Technology/National Agency for Research and Innovation |                                                                                                                                                                                                                                                                                                                                                                                                                                                                                                                                                                                                                                                                                                                                                                                                                                                         |
| EPI_ISL_568690                                                                                                                                                                 | KEMRI-Wellcome Trust Research Programme/KEMRI-CGMR-C Kilifi                                                                                                                        | KEMRI-Wellcome Trust Research Programme/KEMRI-CGMR-C Kilifi                                                             |                                                                                                                                                                                                                                                                                                                                                                                                                                                                                                                                                                                                                                                                                                                                                                                                                                                         |
| EPI_ISL_568725, EPI_ISL_568727, EPI_ISL_568764, EPI_ISL_568872                                                                                                                 | Malaysia Genome Institute                                                                                                                                                          | Malaysia Genome Institute                                                                                               |                                                                                                                                                                                                                                                                                                                                                                                                                                                                                                                                                                                                                                                                                                                                                                                                                                                         |
| EPI_ISL_568875                                                                                                                                                                 | MEPHI, Aix Marseille University                                                                                                                                                    | MEPHI, Aix Marseille University                                                                                         |                                                                                                                                                                                                                                                                                                                                                                                                                                                                                                                                                                                                                                                                                                                                                                                                                                                         |
| EPI_ISL_569000, EPI_ISL_569100, EPI_ISL_569149                                                                                                                                 | Ornsk Research Institute of Natural Focal Infections                                                                                                                               | WHO National Influenza Centre Russian Federation                                                                        | Moid Noor Matlisa, Iri Sutaryu Sapten, Yusuf Muhammad Noor, Nurzeeren Md Iqbal, Mohd Fazel Abu Bakar, Eritza Kasim, Shamsida Sophie, Siti Noorain Othman, Azim Ahmad, Nor Azza Johari, Shantul Nisham Zahra Arifin                                                                                                                                                                                                                                                                                                                                                                                                                                                                                                                                                                                                                                      |
| EPI_ISL_569738, EPI_ISL_569752, EPI_ISL_569768, EPI_ISL_569779, EPI_ISL_569836, EPI_ISL_569813, EPI_ISL_569819, EPI_ISL_569836, EPI_ISL_569843, EPI_ISL_569844                 | Uniy Health Toronto                                                                                                                                                                | Ontario Institute for Cancer Research                                                                                   | Atem Fadeev, Ekaterina Grudoboeva, Ekaterina Savkina, Daria Nasybatyeva, Elna Poyeshchuk, Aleksei Vasilenko, Valery Yakimenko, Andrey Komissarov                                                                                                                                                                                                                                                                                                                                                                                                                                                                                                                                                                                                                                                                                                        |
| EPI_ISL_569966, EPI_ISL_569981, EPI_ISL_569993, EPI_ISL_569996, EPI_ISL_569998, EPI_ISL_570008                                                                                 | Uniy Health Toronto                                                                                                                                                                | Ontario Institute for Cancer Research                                                                                   |                                                                                                                                                                                                                                                                                                                                                                                                                                                                                                                                                                                                                                                                                                                                                                                                                                                         |
| EPI_ISL_572366, EPI_ISL_572371, EPI_ISL_572386                                                                                                                                 | LAQEN/PE                                                                                                                                                                           | Walaupun, Aggar Magalhães Institute                                                                                     | Ramzi Fatouh, Larissa M. Matukas, Yan Chen, Mark Downing, Tina Otieman, Karel Boissinot, Wai Sum Sit, Zhu Ci, Le Lu, Samira Mubareka, TIBDN, Ilina Lungu, Bernard Lam, Jeremy Johns, Paul Krzyzanski, Richard de Bora, Falcia Vincelli, Phillip Zuzarte, Jared T. Simpson                                                                                                                                                                                                                                                                                                                                                                                                                                                                                                                                                                               |
| EPI_ISL_572397                                                                                                                                                                 | Institute for Virology, University Hospital Duesseldorf, Medical Faculty, Heinrich-Heine-University Duesseldorf                                                                    | Institute for Virology, University Hospital Duesseldorf, Medical Faculty, Heinrich-Heine-University Duesseldorf         | Maximilian Damagge, Verena Keitel, Bjorn Jensen, Nadine Lukke, Lisa Müller, Philipp Oesemann, Tina Sarti, Onwiri Adams, Philipp Albrecht, Gerald Antoch, Johannes Bode, Edvin Bolke, Saskia Eiben, Torsten Feld, Johannes C. Fischer, Anselm Kunstein, Caroline Klindt, Alexander Klier, Tom Lütde, Annemarie Mohring, Jennifer Neubert, Heiner Schaal, Ansgar Schütz, Jörg Timm, Andreas Walker                                                                                                                                                                                                                                                                                                                                                                                                                                                        |
| EPI_ISL_573760                                                                                                                                                                 | Northumbria University / South Tees Hospitals NHS Foundation Trust / North Cumbria Integrated Care NHS Foundation Trust / Newcastle Hospitals NHS Foundation Trust                 | COVID-19 Genomics UK (COG-UK) Consortium                                                                                | Marcelo Henrique Santos Paiva, Dusepinka Ribeiro Duarte, Gaudes, Cassia Docena, Mathews Filgueira Bezerra, Filipe Zimmer, Deozidi, Laís Ceschini Machado, Larissa Krotkovsky, Elisama Helvecio, Alexandre Frieles da Silva, Luísdson Richardson, Silva Vasconcelos, Antonio Munro Bezerra, Jefferson Ribeiro da Silva, Kamila Gaudêncio da Silva Sales, Buira Santos, Lima Figueiredo de Sá, Derlenciano Lopes da Cruz, Claudio Eduardo Cavalcanti, Armando de Moraes Neto, Carolina Targino Alves da Silva, Renata Passa, Germano Mendes, Maria Aparecida Lopes da Silva, Tiago Gafá, Paola Cristina Resende, Gonzalo Bellón, Michelle da Silva Barros, Wilhelton Ricardo Correia do Nascimento, Rodrigo Moraes Lajo Andrade, Luciane Caroline Albuquerque Bezerra, Simval Pinho Barbedo Filho, Constância Flavia Junqueira Ayres, Gabriel Luiz Waihan |
| EPI_ISL_574431                                                                                                                                                                 | Hospital IESS Babahoyo                                                                                                                                                             | Institute of Microbiology, Universidad San Francisco de Quito                                                           | Darren L Smith, Andrew Nelson, Matthew Bashiron, Gagg R Young, Joshua Loh, John Allan, Mohammad A Tarif, Giles S Holt, Gary Black, Wen C Yew, Lynn Dover, Paul Baker, Steve Liggell, Sarah Essex, Jane Greenaway, Debra Padgett, Olive Graham, Garen Scott, Edward Barton, Emma Swindells, Brendan Payne, Jennifer Collins, Yvst Tana, Gary Ellingham                                                                                                                                                                                                                                                                                                                                                                                                                                                                                                   |
| EPI_ISL_574519                                                                                                                                                                 | National Public Health Laboratory, National Centre for Infectious Diseases                                                                                                         | COVID-19 Genomics UK (COG-UK) Consortium                                                                                | Catherine Moore, Johnathan Evans, Laura Gifford, Malorie Perry, Simon Cottrell, Angeli Marchbank, Alec Birchley, Alexander Adams, Amy Gaslin, Bree Gatica Wilcox, Jason Combes, Joel Sounjigale, Lauren Gilbert, Lee Graham, Nicole Paschiani, Sara Kunzense-Sumnerhayes, Sarah Taylor, Sophie Jones, Sara Ray, Matthew Bull, Joanne Walkins, Sally Corden, Tom Connor                                                                                                                                                                                                                                                                                                                                                                                                                                                                                  |
| EPI_ISL_574594                                                                                                                                                                 | Hospital Escola da Universidade de Trubate                                                                                                                                         | Instituto Adolfo Lutz, Interdisciplinary Procedures Center, Strategic Laboratory                                        | Belen Prado-Vivar, Sully Matquez, Juan José Guadalupe, Monica Becerra-Wong, Fernanda Zurita, Bernardo Gutiérrez, Francisco Cordova, Nina Henriquez, Kellen Briones-Zamora, Kellen Briones-Claudette, Verónica Baragán, Patricia Rojas-Silva, Gabriela Trueta, Michelle Grünauer, Paul Cadenas                                                                                                                                                                                                                                                                                                                                                                                                                                                                                                                                                           |
| EPI_ISL_574596                                                                                                                                                                 | CS II Dr. Antonio Vicoso Moreira de Rezende Sumare                                                                                                                                 | Instituto Adolfo Lutz, Interdisciplinary Procedures Center, Strategic Laboratory                                        | Tae Minn Mak, Sophie Octavia, Zhenyang Zhou, Lin Cui, Raymond Tze Pin Lin                                                                                                                                                                                                                                                                                                                                                                                                                                                                                                                                                                                                                                                                                                                                                                               |
| EPI_ISL_574597                                                                                                                                                                 | Secretaria Municipal de Saude de Jarnu                                                                                                                                             | Instituto Adolfo Lutz, Interdisciplinary Procedures Center,                                                             | Claudio Tavares Sacchi, Claudia Regina Gonçalves, Erica Valessa Ramos Gomes, Karoline Rodrigues Campos                                                                                                                                                                                                                                                                                                                                                                                                                                                                                                                                                                                                                                                                                                                                                  |

|                |                                                                                                     |                                                                                                                                                                                                                                                                                                                                                                                                                                                                  |                                                                                                                                                                                                                                                                                                                                                                                                                                                                                                                                                                                   |
|----------------|-----------------------------------------------------------------------------------------------------|------------------------------------------------------------------------------------------------------------------------------------------------------------------------------------------------------------------------------------------------------------------------------------------------------------------------------------------------------------------------------------------------------------------------------------------------------------------|-----------------------------------------------------------------------------------------------------------------------------------------------------------------------------------------------------------------------------------------------------------------------------------------------------------------------------------------------------------------------------------------------------------------------------------------------------------------------------------------------------------------------------------------------------------------------------------|
| EPI_ISL_574598 | Service de Verificação de Ohio SVO                                                                  | Instituto Adolfo Lutz, Interdisciplinary Procedures Center, Strategic Laboratory                                                                                                                                                                                                                                                                                                                                                                                 | Claudio Tavares Sacchi, Claudia Regina Gonçalves, Erica Valessa Ramos Gomes, Karoline Rodrigues Campos                                                                                                                                                                                                                                                                                                                                                                                                                                                                            |
| EPI_ISL_574612 | RS Hemina Mekarsari                                                                                 | Elkman Institute for Molecular Biology, Ministry of Research and Technology/National Agency for Research and Innovation                                                                                                                                                                                                                                                                                                                                          | Filialita A Yudhapurini, Edison Johar, Hidayat Trimarsanto, Iskandar A Adnan, Willy Augustine, David H Mujiono, Safarina G Malik, Herawati Sudoyo, Khin Saw Myint, Amin Soebandrio                                                                                                                                                                                                                                                                                                                                                                                                |
| EPI_ISL_574616 | RS Kramat 128                                                                                       | Elkman Institute for Molecular Biology, Ministry of Research and Technology/National Agency for Research and Innovation                                                                                                                                                                                                                                                                                                                                          | Filialita A Yudhapurini, Edison Johar, Hidayat Trimarsanto, Iskandar A Adnan, Willy Augustine, David H Mujiono, Safarina G Malik, Herawati Sudoyo, Khin Saw Myint, Amin Soebandrio                                                                                                                                                                                                                                                                                                                                                                                                |
| EPI_ISL_574660 | Seattle Flu Study                                                                                   | Seattle Flu Study                                                                                                                                                                                                                                                                                                                                                                                                                                                | Deborah A Nickerson, Chris D. Frazer, Jozer Lee, Benjamin Paley, Matthew Richardson, Amanda Adler, Elisabeth Bandstetter, Peter D. Han, Karsten Fay, Misja Ijssin, Krisnan Lacombe, Thomas R. Shiley, Melissa Truong, Caitlin R. Wolf, Karen Conwell, Stephanie Scriba, Jeff Duchin, Michael Beach, Janet A. Englund, Michael Fulmire, Barry R. Lutz, Mark J. Rieder, Lea M. Starik, Matthew Thompson, Helen Y. Chu, Trevor Bedford, Jay Shendure                                                                                                                                 |
| EPI_ISL_575331 | RSUD Wates                                                                                          | Genetics Working Group (Pojka Genetik) Faculty of Medicine, Public Health and Nursing Universitas Gadjah Mada (FK-KMK UGM); Disease Investigation Center Wates Ministry of Agriculture Indonesia; Department of Microbiology FK-KMK UGM; Laboratorium Diagnostik Yayasan Tahlia World Mosquito Program (WMP) Yogyakarta Center for Tropical Medicine FK-KMK UGM; Integrated Research Center FK-KMK UGM; Department of Computer Science and Electronics FMIPA UGM | Wibawa, Dwi AA Nugrahainingsih, Alahayati, Suswanto, Krisdy Anggorwati, Riki, Endah Supriyati, Eggi Arguni, Tiki Nurjastuti, Tri Wibawa, Dwi AA Nugrahainingsih, Alahayati, Suswanto, Krisdy Iskandari, Nungki Anggorwati, Bastiano Kusumajaya, Zurnali Ahmad, Awin S. Kalim, Susan Simanjaya                                                                                                                                                                                                                                                                                     |
| EPI_ISL_575332 | Israel Central Virology Laboratory                                                                  | Genetics Working Group (Pojka Genetik) Faculty of Medicine, Public Health and Nursing Universitas Gadjah Mada (FK-KMK UGM); Disease Investigation Center Wates Ministry of Agriculture Indonesia; Department of Microbiology FK-KMK UGM; Laboratorium Diagnostik Yayasan Tahlia World Mosquito Program (WMP) Yogyakarta Center for Tropical Medicine FK-KMK UGM; Integrated Research Center FK-KMK UGM; Department of Computer Science and Electronics FMIPA UGM | Neia Zuckerman, Efrat Dahan Bueis, Oran Estler, Eila Merdelson, Michal Mandelboim                                                                                                                                                                                                                                                                                                                                                                                                                                                                                                 |
| EPI_ISL_576115 | RSUP Dr. Sardjito                                                                                   | Department of Respiratory and Other Viral Infections of L. V. Gornashinsky Institute of Epidemiology & Infectious Diseases NAMS of Ukraine                                                                                                                                                                                                                                                                                                                       | Gunadi, Herda Wibawa, Marcellus, Mohamad S. Hakim, Edwin W. Damwijaya, Luthiang P. Rizki, Endah Supriyati, Eggi Arguni, Tiki Nurjastuti, Tri Wibawa, Dwi AA Nugrahainingsih, Alahayati, Suswanto, Krisdy Anggorwati, Ika Trisnawati, Rati El Khrir, Yunka Puspadewi, Osman Stampar, Umi Salekiah Intansari, Elizabeth Henry Henningsyas, Ira Puspitawati, Nur Irma Falmah Harahap, Untung Wirawan, Maria Patricia Ingriani                                                                                                                                                        |
| EPI_ISL_576259 | Instituto de Diagnostico y Referencia Epidemiologicos (INDRE)                                       | Department of Respiratory and Other Viral Infections of L. V. Gornashinsky Institute of Epidemiology & Infectious Diseases NAMS of Ukraine                                                                                                                                                                                                                                                                                                                       | Alla Mironenko, Ihor Kravchuk, Ludmyla Bolotova, Larysa Radchenko, Natalia Tereluk                                                                                                                                                                                                                                                                                                                                                                                                                                                                                                |
| EPI_ISL_576289 | Instituto de Diagnostico y Referencia Epidemiologicos (INDRE)                                       | Department of Respiratory and Other Viral Infections of L. V. Gornashinsky Institute of Epidemiology & Infectious Diseases NAMS of Ukraine                                                                                                                                                                                                                                                                                                                       | Brazzo M., Madeddu, S., Santoro, F., Pirzanti, D.                                                                                                                                                                                                                                                                                                                                                                                                                                                                                                                                 |
| EPI_ISL_576278 | Instituto de Diagnostico y Referencia Epidemiologicos (INDRE)                                       | Department of Respiratory and Other Viral Infections of L. V. Gornashinsky Institute of Epidemiology & Infectious Diseases NAMS of Ukraine                                                                                                                                                                                                                                                                                                                       | Gisela Barrera-Badillo, April Rodriguez-Maldonado, Claudia Wong-Arambula, Natividad Cruz-Ortiz, Tatiana Nunez-Garcia, Dayarina Arellano-Suarez, Fabiola Carces-Ayala, Edgar Mendez-Cordado, Lucia Hernandez-Rivas, Irma Lopez-Martinez, Ernesto Ramirez-Gonzalez,                                                                                                                                                                                                                                                                                                                 |
| EPI_ISL_576558 | UW Virology Lab                                                                                     | Instituto de Diagnostico y Referencia Epidemiologicos (INDRE)                                                                                                                                                                                                                                                                                                                                                                                                    | Enesio Ramirez-Gonzalez, April Rodriguez-Maldonado, Claudia Wong-Arambula, Natividad Cruz-Ortiz, Tatiana Nunez-Garcia, Dayarina Arellano-Suarez, Adnan Ariza-Rodriguez, Fabiola Carces-Ayala, Lucia Hernandez-Rivas, Irma Lopez-Martinez, Gisela Barrera-Badillo,                                                                                                                                                                                                                                                                                                                 |
| EPI_ISL_577697 | Area of Virology, Serology and Virology Division (SAVID), New South Wales Health Pathology Randwick | Instituto de Diagnostico y Referencia Epidemiologicos (INDRE)                                                                                                                                                                                                                                                                                                                                                                                                    | Ernesto Ramirez-Gonzalez, April Rodriguez-Maldonado, Claudia Wong-Arambula, Natividad Cruz-Ortiz, Tatiana Nunez-Garcia, Dayarina Arellano-Suarez, Adnan Ariza-Rodriguez, Edgar Mendez-Cordado, Lucia Hernandez-Rivas, Irma Lopez-Martinez, Gisela Barrera-Badillo,                                                                                                                                                                                                                                                                                                                |
| EPI_ISL_577697 | Area of Virology, Serology and Virology Division (SAVID), New South Wales Health Pathology Randwick | UW Virology Lab                                                                                                                                                                                                                                                                                                                                                                                                                                                  | Pavitra Roychowdhury, Hong Xie, Laszlo Shrestha, Amin Adetula, Victoria M Racheli, Meeli-Li Huang, Keith R Jerome, Alexander Greeninger                                                                                                                                                                                                                                                                                                                                                                                                                                           |
| EPI_ISL_577727 | The National Institute of Public Health                                                             | Area of Virology, Serology and Virology Division (SAVID), New South Wales Health Pathology Randwick                                                                                                                                                                                                                                                                                                                                                              | Rawlinson, W., Bull, R., Davison, I.                                                                                                                                                                                                                                                                                                                                                                                                                                                                                                                                              |
| EPI_ISL_577734 | Institute of Virology, Biomedical Research Center of the Slovak Academy of Sciences, Bratislava     | Area of Virology, Serology and Virology Division (SAVID), New South Wales Health Pathology Randwick                                                                                                                                                                                                                                                                                                                                                              | Nagy A., Jirincova, H., Novakova, L., Trnka, D., Vecerova, J.                                                                                                                                                                                                                                                                                                                                                                                                                                                                                                                     |
| EPI_ISL_577739 | Institute of Virology, Biomedical Research Center of the Slovak Academy of Sciences, Bratislava     | NIV Influenza                                                                                                                                                                                                                                                                                                                                                                                                                                                    | Poddar, V                                                                                                                                                                                                                                                                                                                                                                                                                                                                                                                                                                         |
| EPI_ISL_577740 | Institute of Virology, Biomedical Research Center of the Slovak Academy of Sciences, Bratislava     | Faculty of Natural Sciences, Comenius University, Bratislava                                                                                                                                                                                                                                                                                                                                                                                                     | Viktoria Hodorová, Kristína Boršová, Bora Bjeļová, Viktória abanová, Dominika Fírová, Sabina Furnaová Havlíková, Juraĭ Kopaĭek, Martina Liková, ubomira Lukáĭková, Viktória Hodorová, Bora Bjeļová, Viktória abanová, Dominika Fírová, Sabina Furnaová Havlíková, Juraĭ Kopaĭek, Martina Liková, ubomira Lukáĭková, Martina Nebořáĭová, Monika Slávková, Edita Starová, Elena Tráňá, Tomáš Vína, Boris Klempa, Jozer Nosek                                                                                                                                                        |
| EPI_ISL_577901 | Dutch COVID-19 response team                                                                        | Faculty of Natural Sciences, Comenius University, Bratislava                                                                                                                                                                                                                                                                                                                                                                                                     | Bora Bjeļová, Viktória Hodorová, Viktória abanová, Dominika Fírová, Sabina Furnaová Havlíková, Juraĭ Kopaĭek, Martina Liková, ubomira Lukáĭková, Martina Nebořáĭová, Monika Slávková, Edita Starová, Elena Tráňá, Tomáš Vína, Boris Klempa, Jozer Nosek                                                                                                                                                                                                                                                                                                                           |
| EPI_ISL_577901 | Dutch COVID-19 response team                                                                        | Erasmus Medical Center                                                                                                                                                                                                                                                                                                                                                                                                                                           | Bas Oude Munnink, Reina Sikkena, David Nieuwenhuijse, Irina Cheshtakova, Anne van der Linden, Marian Boter, Emmanuela Munger, Corine GeurtsvanKessel, Annemiek van der Eijk, Richard Wolterkamp, Marlon Koopmans, on behalf of the Dutch national COVID-19 response team.                                                                                                                                                                                                                                                                                                         |
| EPI_ISL_578188 | Hospital Virgen de las Nieves                                                                       | Instituto de Salud Carlos III                                                                                                                                                                                                                                                                                                                                                                                                                                    | Iglesias-Caballero, M. Molinero Calamita, M. González-Esquerillas M. Camarero, S. Pozo, F. Casasa, I. Jimenez, P. Jimenez, Z. Zaballo, A. Morzon, S. Varona, S. Jullá, M. Cuesta, I. JM Navarro                                                                                                                                                                                                                                                                                                                                                                                   |
| EPI_ISL_578304 | National Virus Reference Laboratory                                                                 | National Virus Reference Laboratory                                                                                                                                                                                                                                                                                                                                                                                                                              | Michael Carr, Gabriel Gonzalez, Jonathan Dean, Suzie Coughlan, Cillian F De Gascon                                                                                                                                                                                                                                                                                                                                                                                                                                                                                                |
| EPI_ISL_579116 | LabPLUS                                                                                             | Institute of Environmental Science and Research (ESR)                                                                                                                                                                                                                                                                                                                                                                                                            | Xiaoyun Ren, Matt Storey, Nikki Freed, Muhammed Faisal, Jing Wang, Hernes Perez, Anja Werno, Antje van der Linden, Ario Upton, Chris Mansell, David Hammer, Dragana Dinkovic, Gary McAuliffe, Hana Sofia Andersson, James Usher, Jill Sherman, Julia Howard, Juliet Ely, Mary DeAlmeida, Matt Blakston, Matthew Rogers, Max Bloomfield, Michael Addie, Michelle Bain, Sally Roberts, Sarah Jelifreres, Sharnni Muliyil, Susan Morpeth, Susan Taylor, Timothy Blackmore, Vani Sathiyendran, Veronica Payle, Virginia Hope, Erasmus Smit, Lauren Jilly, Olin Stander, Joep de Light |
| EPI_ISL_579422 | LabTests                                                                                            | Institute of Environmental Science and Research (ESR)                                                                                                                                                                                                                                                                                                                                                                                                            | Xiaoyun Ren, Matt Storey, Nikki Freed, Muhammed Faisal, Jing Wang, Hernes Perez, Anja Werno, Antje van der Linden, Ario Upton, Chris Mansell, David Hammer, Dragana Dinkovic, Gary McAuliffe, Hana Sofia Andersson, James Usher, Jill Sherman, Julia Howard, Juliet Ely, Mary DeAlmeida, Matt Blakston, Matthew Rogers, Max Bloomfield, Michael Addie, Michelle Bain, Sally Roberts, Sarah Jelifreres, Sharnni Muliyil, Susan Morpeth, Susan Taylor, Timothy Blackmore, Vani Sathiyendran, Veronica Payle, Virginia Hope, Erasmus Smit, Lauren Jilly, Olin Stander, Joep de Light |
| EPI_ISL_579425 | LabPLUS                                                                                             | Institute of Environmental Science and Research (ESR)                                                                                                                                                                                                                                                                                                                                                                                                            | Xiaoyun Ren, Matt Storey, Nikki Freed, Muhammed Faisal, Jing Wang, Hernes Perez, Anja Werno, Antje van der Linden, Ario Upton, Chris Mansell, David Hammer, Dragana Dinkovic, Gary McAuliffe, Hana Sofia Andersson, James Usher, Jill Sherman, Julia Howard, Juliet Ely, Mary DeAlmeida, Matt Blakston, Matthew Rogers, Max Bloomfield, Michael Addie, Michelle Bain, Sally Roberts, Sarah Jelifreres, Sharnni Muliyil, Susan Morpeth, Susan Taylor, Timothy Blackmore, Vani Sathiyendran, Veronica Payle, Virginia Hope, Erasmus Smit, Lauren Jilly, Olin Stander, Joep de Light |
| EPI_ISL_579426 | Canterbury Health Laboratories                                                                      | Institute of Environmental Science and Research (ESR)                                                                                                                                                                                                                                                                                                                                                                                                            | Xiaoyun Ren, Matt Storey, Nikki Freed, Muhammed Faisal, Jing Wang, Hernes Perez, Anja Werno, Antje van der Linden, Ario Upton, Chris Mansell, David Hammer, Dragana Dinkovic, Gary McAuliffe, Hana Sofia Andersson, James Usher, Jill Sherman, Julia Howard, Juliet Ely, Mary DeAlmeida, Matt Blakston, Matthew Rogers, Max Bloomfield, Michael Addie, Michelle Bain, Sally Roberts, Sarah Jelifreres, Sharnni Muliyil, Susan Morpeth, Susan Taylor, Timothy Blackmore, Vani Sathiyendran, Veronica Payle, Virginia Hope, Erasmus Smit, Lauren Jilly, Olin Stander, Joep de Light |

|                                                                                                |                                                                                                                                                                                                                                |                                                                                                                     |                                                                                                                                                                                                                                                                                                                                                                                                                                                                                                                                                             |
|------------------------------------------------------------------------------------------------|--------------------------------------------------------------------------------------------------------------------------------------------------------------------------------------------------------------------------------|---------------------------------------------------------------------------------------------------------------------|-------------------------------------------------------------------------------------------------------------------------------------------------------------------------------------------------------------------------------------------------------------------------------------------------------------------------------------------------------------------------------------------------------------------------------------------------------------------------------------------------------------------------------------------------------------|
| EPI_ISL_579768                                                                                 | Lighthouse Lab in Glasgow                                                                                                                                                                                                      | Wellcome Sanger Institute for the COVID-19 Genomics UK (COG-UK) consortium                                          | Happer VanSteenhouse, Yuni Kasali, David Gray, Carol Clugston, Anna Dominiczak and Alex Alderton, Roberto Amato, Sonia Gonçalves, Ewan Harrison, David K. Jackson, Ian Johnston, Dominic Kwiatkowski, Cordelia Langford, John Sillitoe on behalf of the Wellcome Sanger Institute COVID-19 Surveillance Team                                                                                                                                                                                                                                                |
| EPI_ISL_561103, EPI_ISL_561106                                                                 | Lighthouse Lab in Milton Keynes                                                                                                                                                                                                | Wellcome Sanger Institute for the COVID-19 Genomics UK (COG-UK) consortium                                          | The Lighthouse Lab in Milton Keynes and Alex Alderton, Roberto Amato, Sonia Gonçalves, Ewan Harrison, David K. Jackson, Ian Johnston, Dominic Kwiatkowski, Cordelia Langford, John Sillitoe on behalf of the Wellcome Sanger Institute COVID-19 Surveillance Team                                                                                                                                                                                                                                                                                           |
| EPI_ISL_581489, EPI_ISL_581491, EPI_ISL_581492                                                 | Fondation Comptelise pour la recherche medicale (FCRM)                                                                                                                                                                         | NCS Competence Center Thüringen, Institut für Medizinische Mikrobiologie und Hygiene, Universitätsklinikum Tübingen | Keith Durkin, Maria Artesi, Sébastien Bontems, Raphaël Boreux, Bouchra Boujemla, Cécile Meax, Perrine Meil, Marie-Pierre Hayette, Vincent Bours                                                                                                                                                                                                                                                                                                                                                                                                             |
| EPI_ISL_581622                                                                                 | Department of Clinical Microbiology                                                                                                                                                                                            | GIGA Medical Genomics                                                                                               | Madsen Sange, Alfredo Mai, Tim Radt, Helena MB Sjöf Smith, Michael Schweitzer, Mirya Brunner, Karoline Leuninger, Kristine K. Søgaard, Alexander Gensch, Sarah Tschudin-Suter, Paron F. Furtis, Julia Bielecki, Hans Paringer, Martin Stegmann, Christian Nickel, Roland Brügesser, Michael Ostroff, Stefano Bassetti, Rila Schneider-Silva, Manuel Battagay, Hans Hirschi, Adrian Egli                                                                                                                                                                     |
| EPI_ISL_581891, EPI_ISL_581907, EPI_ISL_581922, EPI_ISL_581929, EPI_ISL_581965                 | University Hospital Basel, Clinical Virology                                                                                                                                                                                   | University Hospital Basel, Clinical Bacteriology                                                                    | Nihad Al-Faheki, Danilo Leao, Sreejith Rajasekharan, Simeone Dal Negro, Alessandro Marcello                                                                                                                                                                                                                                                                                                                                                                                                                                                                 |
| EPI_ISL_582030                                                                                 | Biology Department, College of Science, Al-Muthanna University                                                                                                                                                                 | International Centre for Genetic Engineering and Biotechnology (ICGEB) and ARCO Open Lab Platform                   | Szymon Hryniewicz, Adam Usaszewski, Marta Kaczmarek-Ry, Emilia Lis, Eva Zirkwicz, Micha Witt, Andrzej Pawski                                                                                                                                                                                                                                                                                                                                                                                                                                                |
| EPI_ISL_582031                                                                                 | Institute of Human Genetics, Polish Academy of Sciences                                                                                                                                                                        | Institute of Human Genetics, Polish Academy of Sciences                                                             | Gustavo Cilia, Milagrosa Montes, Luis Pheiro, Jose Maria Marinon and SeqCOVID-SPAIN consortium                                                                                                                                                                                                                                                                                                                                                                                                                                                              |
| EPI_ISL_582053, EPI_ISL_582064, EPI_ISL_582077                                                 | Servicio de Microbiología, Hospital Universitario Donostia, OSI Donostialdea, Area de Enfermedades Infecciosas, Grupo de Infección Respiratoria y Resistencia Antimicrobiana, Instituto de Investigación Sanitaria Biodonostia | SeqCOVID-SPAIN consortium/IBV(CSIC)                                                                                 | Antonin Bal, Gregory Desistas, Gwerddolynne Burff, Hadrien Regue, Alexandre Gaynard, Maude Bousecambeert-Duchamp, Florence Morfin-Sierpa, Marinne Valère, Bruno Lina, Laurence Jossel                                                                                                                                                                                                                                                                                                                                                                       |
| EPI_ISL_582122                                                                                 | CNR Virus des Infections Respiratoires - France SUD                                                                                                                                                                            | CNR Virus des Infections Respiratoires - France SUD                                                                 | Mohd Noor Matisa, Iri Suhayu Sapian, Yusuf Muhammad Noor, Nurzezen Md Iqbal, Mohd Faizal Abu Bakar, Enizza Kasim, Shamsidar Sogpe, Siti Norani Ohman, Azrin Ahmad, Nor Azla Johari, Shahnul Hisham Zainal Arifin                                                                                                                                                                                                                                                                                                                                            |
| EPI_ISL_582124                                                                                 | Malaysia Genome Institute                                                                                                                                                                                                      | Malaysia Genome Institute                                                                                           | Philippe Sehnorst, Colin Anthony                                                                                                                                                                                                                                                                                                                                                                                                                                                                                                                            |
| EPI_ISL_582129                                                                                 | Antwerp University Hospital                                                                                                                                                                                                    | Institute of Tropical Medicine                                                                                      | Anna Majer, Shari Tyson, Grace Seo, Phillip Mabon, Elise Grudecki, Rihannon Huzzarwech, Russell Mandes, Annalese Landgraf, Jennifer Tanner, Natalie Knox, Meng Gaham, Gary Van Dorsselaer, Paul Van Cassele, Jared Bullard, David Alexander, Kerry Durr, Nathalie Bastien, Yanli Li, Timothy Booth, Darian Hole, Madison Chapel, CarCOG&N's metadata curation team, Public Health Agency of Canada CarCOG&N team                                                                                                                                            |
| EPI_ISL_582263, EPI_ISL_582314, EPI_ISL_582321, EPI_ISL_582431, EPI_ISL_582437, EPI_ISL_582477 | Cadnam Provincial Laboratory                                                                                                                                                                                                   | National Microbiology Laboratory (NML)                                                                              | Anna-Malin Linde, Maria Lind Karlberg, Reza Advani, Olov Svarstom, Oskar Karlsson Lindso, Sandra Brodesson, Petra Edquist, Mia Byrting, Anna Risberg, Karin Tegmark-Wisell                                                                                                                                                                                                                                                                                                                                                                                  |
| EPI_ISL_582642, EPI_ISL_582659, EPI_ISL_582662, EPI_ISL_582674, EPI_ISL_582679                 | Sheikh Khalifa Medical City                                                                                                                                                                                                    | Molecular/Surveillance lab Sheikh Khalifa Medical City                                                              | Anna-Malin Linde, Maria Lind Karlberg, Mattias Haukland, Reza Advani, Olov Svarstom, Oskar Karlsson Lindso, Sandra Brodesson, Petra Edquist, Mia Byrting, Anna Risberg, Karin Tegmark-Wisell                                                                                                                                                                                                                                                                                                                                                                |
| EPI_ISL_582784                                                                                 | Uppsala klinisk mikrobiologi                                                                                                                                                                                                   | The Public Health Agency of Sweden                                                                                  | Anna-Malin Linde, Maria Lind Karlberg, Mattias Haukland, Reza Advani, Olov Svarstom, Oskar Karlsson Lindso, Sandra Brodesson, Petra Edquist, Mia Byrting, Anna Risberg, Karin Tegmark-Wisell                                                                                                                                                                                                                                                                                                                                                                |
| EPI_ISL_582795                                                                                 | Umeåns Eskilstuna                                                                                                                                                                                                              | The Public Health Agency of Sweden                                                                                  | Anna-Malin Linde, Maria Lind Karlberg, Mattias Haukland, Reza Advani, Olov Svarstom, Oskar Karlsson Lindso, Sandra Brodesson, Petra Edquist, Mia Byrting, Anna Risberg, Karin Tegmark-Wisell                                                                                                                                                                                                                                                                                                                                                                |
| EPI_ISL_582805                                                                                 | Hälsnätet Klinisk mikrobiologi                                                                                                                                                                                                 | The Public Health Agency of Sweden                                                                                  | Anna-Malin Linde, Maria Lind Karlberg, Mattias Haukland, Reza Advani, Olov Svarstom, Oskar Karlsson Lindso, Sandra Brodesson, Petra Edquist, Mia Byrting, Anna Risberg, Karin Tegmark-Wisell                                                                                                                                                                                                                                                                                                                                                                |
| EPI_ISL_582808                                                                                 | Klinisk Mikrobiologi                                                                                                                                                                                                           | The Public Health Agency of Sweden                                                                                  | Anna-Malin Linde, Maria Lind Karlberg, Mattias Haukland, Reza Advani, Olov Svarstom, Oskar Karlsson Lindso, Sandra Brodesson, Petra Edquist, Mia Byrting, Anna Risberg, Karin Tegmark-Wisell                                                                                                                                                                                                                                                                                                                                                                |
| EPI_ISL_582836                                                                                 | Klinisk mikrobiologi Västernorrland                                                                                                                                                                                            | The Public Health Agency of Sweden                                                                                  | Anna-Malin Linde, Maria Lind Karlberg, Mattias Haukland, Reza Advani, Olov Svarstom, Oskar Karlsson Lindso, Sandra Brodesson, Petra Edquist, Mia Byrting, Anna Risberg, Karin Tegmark-Wisell                                                                                                                                                                                                                                                                                                                                                                |
| EPI_ISL_5834481, EPI_ISL_583465                                                                | Institute of Virology, Biomedical Research Center of the Slovak Academy of Sciences, Bratislava                                                                                                                                | Faculty of Natural Sciences, Comenius University, Bratislava                                                        | Viklória Hodorová, Kristína Boršová, Boja Bielejová, Viktória Šabanová, Dominika Fliová, Sabina Fumurová Havliková, Juriel Kožáček, Martina Liková, ubomira Lukalčková, Martina Nebořilová, Monika Slavíková, Edita Staroňová, Elena Trná, Tomáš Vnía, Jozef Nosek, Boris Klengpa                                                                                                                                                                                                                                                                           |
| EPI_ISL_583495                                                                                 | Servico de Verificação de Óbitos SVO Guanulhos                                                                                                                                                                                 | Instituto Adolfo Lutz, Interdisciplinary Procedures Center, Bratislava                                              | Claudio Tavares Sacchi, Claudia Regina Gonçalves, Erica Valessa Ramos Gomes, Karoline Rodrigues Campos                                                                                                                                                                                                                                                                                                                                                                                                                                                      |
| EPI_ISL_583496                                                                                 | UFA Jandira                                                                                                                                                                                                                    | Instituto Adolfo Lutz, Interdisciplinary Procedures Center, Strategic Laboratory                                    | Claudio Tavares Sacchi, Claudia Regina Gonçalves, Erica Valessa Ramos Gomes, Karoline Rodrigues Campos                                                                                                                                                                                                                                                                                                                                                                                                                                                      |
| EPI_ISL_583497                                                                                 | Complexo Hospitalar Ouro Verde de Campinas                                                                                                                                                                                     | Instituto Adolfo Lutz, Interdisciplinary Procedures Center, Strategic Laboratory                                    | Claudio Tavares Sacchi, Claudia Regina Gonçalves, Erica Valessa Ramos Gomes, Karoline Rodrigues Campos                                                                                                                                                                                                                                                                                                                                                                                                                                                      |
| EPI_ISL_583498                                                                                 | Hospital Municipal Dr. Waldemar Tebaldi                                                                                                                                                                                        | Instituto Adolfo Lutz, Interdisciplinary Procedures Center, Strategic Laboratory                                    | Claudio Tavares Sacchi, Claudia Regina Gonçalves, Erica Valessa Ramos Gomes, Karoline Rodrigues Campos                                                                                                                                                                                                                                                                                                                                                                                                                                                      |
| EPI_ISL_583499                                                                                 | Distrito Santiano Sul Campinas                                                                                                                                                                                                 | Instituto Adolfo Lutz, Interdisciplinary Procedures Center, Strategic Laboratory                                    | Claudio Tavares Sacchi, Claudia Regina Gonçalves, Erica Valessa Ramos Gomes, Karoline Rodrigues Campos                                                                                                                                                                                                                                                                                                                                                                                                                                                      |
| EPI_ISL_583500                                                                                 | Centro de Saude I Tacio Leite de Carvalho e Silva                                                                                                                                                                              | Instituto Adolfo Lutz, Interdisciplinary Procedures Center, Strategic Laboratory                                    | Claudio Tavares Sacchi, Claudia Regina Gonçalves, Erica Valessa Ramos Gomes, Karoline Rodrigues Campos                                                                                                                                                                                                                                                                                                                                                                                                                                                      |
| EPI_ISL_583502                                                                                 | Sav de Vig Sanitaria Epidemio e CTFL de Zoonoses Guanaju                                                                                                                                                                       | Instituto Adolfo Lutz, Interdisciplinary Procedures Center, Strategic Laboratory                                    | Claudio Tavares Sacchi, Claudia Regina Gonçalves, Erica Valessa Ramos Gomes, Karoline Rodrigues Campos                                                                                                                                                                                                                                                                                                                                                                                                                                                      |
| EPI_ISL_583503                                                                                 | CTA Centro de Testagem e Acompanhamento                                                                                                                                                                                        | Instituto Adolfo Lutz, Interdisciplinary Procedures Center, Strategic Laboratory                                    | Claudio Tavares Sacchi, Claudia Regina Gonçalves, Erica Valessa Ramos Gomes, Karoline Rodrigues Campos                                                                                                                                                                                                                                                                                                                                                                                                                                                      |
| EPI_ISL_583504, EPI_ISL_583505                                                                 | Casa de Saude Stela Maris                                                                                                                                                                                                      | Instituto Adolfo Lutz, Interdisciplinary Procedures Center, Strategic Laboratory                                    | Claudio Tavares Sacchi, Claudia Regina Gonçalves, Erica Valessa Ramos Gomes, Karoline Rodrigues Campos                                                                                                                                                                                                                                                                                                                                                                                                                                                      |
| EPI_ISL_583657, EPI_ISL_583666                                                                 | Austrian Agency for Health and Food Safety (AGES)                                                                                                                                                                              | Bergthaler laboratory, CAMM Research Center for Molecular Medicine of the Austrian Academy of Sciences              | Alexandra Popa, Benedikt Agerer, Henrike Colaco, Lukas Erdler, Jakob Wendelin Genger, Alexander Lercher, Mark Smyth, Thomas Penz, Michael Schuster, Jan Laine, Martin Senekowitsch, Judith Aberle, Stephan Aberle, Peter Hünig, Daniela Schmid, Franz Aliebringer, Elisabeth Puchhammer-Schoeck, Manfred Haiz, Guenter Weiss, Gregor Hörmann, Kinga Rigler-Horvathar, Rainer Gättinger, Wegene Borena, Dorothee von Laer, Gernot Walder, Peter Ogris, Christian Paar, Sabine Susztik-Rack, Gunther Vogl, Adi Steirniggl, Christoph Bock, Andreas Bergthaler |
| EPI_ISL_583693, EPI_ISL_583710                                                                 | Center for Virology, Medical University of Vienna                                                                                                                                                                              | Bergthaler laboratory, CAMM Research Center for Molecular Medicine of the Austrian Academy of Sciences              | Alexandra Popa, Benedikt Agerer, Henrike Colaco, Lukas Erdler, Jakob Wendelin Genger, Alexander Lercher, Mark Smyth, Thomas Penz, Michael Schuster, Jan Laine, Martin Senekowitsch, Judith Aberle, Stephan Aberle, Peter Hünig, Daniela Schmid, Franz Aliebringer, Elisabeth Puchhammer-Schoeck, Manfred Haiz, Guenter Weiss, Gregor Hörmann, Kinga Rigler-Horvathar, Rainer Gättinger, Wegene Borena, Dorothee von Laer, Gernot Walder, Peter Ogris, Christian Paar, Sabine Susztik-Rack, Gunther Vogl, Adi Steirniggl, Christoph Bock, Andreas Bergthaler |
| EPI_ISL_583847                                                                                 | Dr. Gernot Walder GmbH                                                                                                                                                                                                         | Bergthaler laboratory, CAMM Research Center for Molecular Medicine of the Austrian Academy of Sciences              | Alexandra Popa, Benedikt Agerer, Henrike Colaco, Lukas Erdler, Jakob Wendelin Genger, Alexander Lercher, Mark Smyth, Thomas Penz, Michael Schuster, Jan Laine, Martin Senekowitsch, Judith Aberle, Stephan Aberle, Peter Hünig, Daniela Schmid, Franz Aliebringer, Elisabeth Puchhammer-Schoeck, Manfred Haiz, Guenter Weiss, Gregor Hörmann, Kinga Rigler-Horvathar, Rainer Gättinger, Wegene Borena, Dorothee von Laer, Gernot Walder, Peter Ogris, Christian Paar, Sabine Susztik-Rack, Gunther Vogl, Adi Steirniggl, Christoph Bock, Andreas Bergthaler |

|                                                                                |                                                                                                                                                                                                 |                                                                                                                      |                                                                                                                                                                                                                                                                                                                                                                                                                                                                                                                                                      |
|--------------------------------------------------------------------------------|-------------------------------------------------------------------------------------------------------------------------------------------------------------------------------------------------|----------------------------------------------------------------------------------------------------------------------|------------------------------------------------------------------------------------------------------------------------------------------------------------------------------------------------------------------------------------------------------------------------------------------------------------------------------------------------------------------------------------------------------------------------------------------------------------------------------------------------------------------------------------------------------|
| EPI_ISL_583883, EPI_ISL_583885, EPI_ISL_583887                                 | Austrian Agency for Health and Food Safety (AGES)                                                                                                                                               | Berghofer laboratory, CeMM Research Center for Molecular Medicine of the Austrian Academy of Sciences                | Alexandra Popa, Benedikt Agerer, Henrique Colaco, Lukasz Erdler, Jakob Wendelin Genger, Alexander Leichter, Mark Smyth, Thomas Parz, Michael Schuster, Jan Larng, Martin Senekowitsch, Judith Aeberle, Siglufn Abenie, Peter Hünigsi, Daniela Schmid, Franz Althuberger, Elisabeth Puchhammer-Schoeck, Manfred Haas, Guenter Hofmann, Kriega Rigler-Hohemayer, Rainer Gaitsinger, Weygna Borena, Dorothee von Laer, Gernot Walder, Peter Ogris, Christian Pass, Sabine Sussitz-Hack, Günther Vogl, Adi Sternrigl, Christoph Bock, Andreas Bergthaler |
| EPI_ISL_583956                                                                 | UOC Microbiologia e Virologia, Azienda Ospedaliera Universitaria Senese, Siena, Italy                                                                                                           | Dipartimento di Biotechnologie Mediche                                                                               | Maria Grazia Cusi, David Prinzauti, Claudia Gandolfo, Gabriele Anchini, Gianni Pazzi, Francesco Santoro                                                                                                                                                                                                                                                                                                                                                                                                                                              |
| EPI_ISL_584072                                                                 | IZSM                                                                                                                                                                                            | IZSM                                                                                                                 | Maurizio Viscardi, Lorenza Cardillo, Giovanna Fusco                                                                                                                                                                                                                                                                                                                                                                                                                                                                                                  |
| EPI_ISL_584073, EPI_ISL_584076                                                 | The National Institute of Public Health                                                                                                                                                         | State Veterinary Institute Prague                                                                                    | Nagy A.,Yilmova,H,Novakova,L.,Trnka,D,Veevorova,J                                                                                                                                                                                                                                                                                                                                                                                                                                                                                                    |
| EPI_ISL_585196, EPI_ISL_585223, EPI_ISL_585247                                 | Regional Virus Laboratory, Belfast Health and Social Care Trust                                                                                                                                 | COVID-19 Genomics UK (COG-UK) Consortium                                                                             | Conall McCaughey, James McKenna, Tanya Curran, Susan Feevery, Alison Watt, Ciara Cox, Mairead Connor, Zoltan Molnar, David Simpson, Derek Farley                                                                                                                                                                                                                                                                                                                                                                                                     |
| EPI_ISL_586016                                                                 | Wales Specialist Virology Centre Sequencing Lab: Pathogen Genomics Unit                                                                                                                         | COVID-19 Genomics UK (COG-UK) Consortium                                                                             | Catherine Moore, Johnathan Evans, Laura Gilford, Malorie Parry, Simon Cottrell, Angela Marchbank, Aye Birchler, Alexander Adams, Amy Gaskin, Brie Gatica-Wilcox, Jason Combes, Joel Southgate, Leonie Gilbert, Lee Graham, Nicola Paschiani, Sara Kunzruss-Summerhayes, Sarah Taylor, Sophie Jones, Sara Ray, Matthew Bull, Joanne Watkins, Sally Corden, Tom Connor                                                                                                                                                                                 |
| EPI_ISL_586320                                                                 | Toronto Invasive Bacterial Diseases Network                                                                                                                                                     | McMaster University                                                                                                  | Allison McGeer, Parlyk Aftanas, Hooman Derakhtshani, Emily Panoussi, Ahmed Drata, Jalees Nasir, Michael Surete, Samira Mbaraka, Andrew G. McArthur                                                                                                                                                                                                                                                                                                                                                                                                   |
| EPI_ISL_587074                                                                 | Lighthouse Lab in Alderley Park                                                                                                                                                                 | Welcome Sanger Institute for the COVID-19 Genomics UK (COG-UK) Consortium                                            | Jacquelyn Wynn, Mairead Hyland, The Lighthouse Lab in Alderley Park and Alex Alderton, Roberto Arana, Sonia Goncalves, Ewan Harrison, David K. Jackson, Ian Johnston, Dominic Kwiatkowski, Cordelia Langford, John Sillitoe on behalf of the Wellcome Sanger Institute COVID-19 Surveillance Team                                                                                                                                                                                                                                                    |
| EPI_ISL_589954, EPI_ISL_590489, EPI_ISL_590667                                 | Lighthouse Lab in Glasgow                                                                                                                                                                       | Welcome Sanger Institute for the COVID-19 Genomics UK (COG-UK) consortium                                            | Happel VansSteenhoven, Yumi Kasai, David Gray, Carol Oulsgaard, Anna Dominiczak and Alex Alderton, Roberto Amato, Sonia Goncalves, Ewan Harrison, David K. Jackson, Ian Johnston, Dominic Kwiatkowski, Cordelia Langford, John Sillitoe on behalf of the Wellcome Sanger Institute COVID-19 Surveillance Team ( <a href="http://www.sanger.ac.uk/covid-team">http://www.sanger.ac.uk/covid-team</a> )                                                                                                                                                |
| EPI_ISL_590336                                                                 | Institute of Medical Virology, University of Zurich                                                                                                                                             | Institute of Medical Virology, University of Zurich                                                                  | Marie O. Pohl, Idoia Busnadiego, Verena Kulmer, Stefan Schmutz, Marlyam Zaheri, Irene Abela, Alexandra Trkola, Michael Huber, Silke Stertz, Benjamin G. Hale                                                                                                                                                                                                                                                                                                                                                                                         |
| EPI_ISL_590388                                                                 | Vestfold Hospital, Toensberg Department of Microbiology                                                                                                                                         | Norwegian Institute of Public Health, Department of Virology                                                         | Kathrine Stene-Johansen, Kamilla Heddeland Insetjord, Hilde Eisthaug, Rasmus Rits Kopperud, Hilde Volian, Karoline Bragstad, Olav Hungnes                                                                                                                                                                                                                                                                                                                                                                                                            |
| EPI_ISL_590908                                                                 | Oslo University Hospital, Department of Medical Microbiology                                                                                                                                    | Norwegian Institute of Public Health, Department of Virology                                                         | Kathrine Stene-Johansen, Kamilla Heddeland Insetjord, Hilde Eisthaug, Rasmus Rits Kopperud, Hilde Volian, Karoline Bragstad, Olav Hungnes                                                                                                                                                                                                                                                                                                                                                                                                            |
| EPI_ISL_590997, EPI_ISL_591004                                                 | Ostfold Hospital Trust - Kalnes, Centre for Laboratory Medicine, Section for gene technology and infection serology                                                                             | Norwegian Institute of Public Health, Department of Virology                                                         | Kathrine Stene-Johansen, Kamilla Heddeland Insetjord, Hilde Eisthaug, Rasmus Rits Kopperud, Hilde Volian, Karoline Bragstad, Olav Hungnes                                                                                                                                                                                                                                                                                                                                                                                                            |
| EPI_ISL_591011                                                                 | Oslo University Hospital, Department of Medical Microbiology                                                                                                                                    | Norwegian Institute of Public Health, Department of Virology                                                         | Kathrine Stene-Johansen, Kamilla Heddeland Insetjord, Hilde Eisthaug, Rasmus Rits Kopperud, Hilde Volian, Karoline Bragstad, Olav Hungnes                                                                                                                                                                                                                                                                                                                                                                                                            |
| EPI_ISL_591086                                                                 | Viral Respiratory Lab, National Institute for Biomedical Research (INRB)                                                                                                                        | Pathogen Sequencing Lab, National Institute for Biomedical Research (INRB)                                           | Placide Mbalakingebani, Edith Nkwembe, Eddy Kingonda-Lusamaki, Amuri Aziza, Francisca Nkwembe Mawete, Emmanuel Lolito Lofico, Jean Claude Makengara, Catherine Prati, Mathias Pauther, Josh Clark, Allison Black, James Hatfield, Trevor Bedford, Ian Goodfellow, Andrew Rambaut, Nick Loman, Kristian Andersen, Michael Wiley, Steve Altmann/Widhele, Jean-Jacques Muyembe Tshumu                                                                                                                                                                   |
| EPI_ISL_591186                                                                 | Toronto Invasive Bacterial Diseases Network                                                                                                                                                     | McMaster University                                                                                                  | Allison McGeer, Parlyk Aftanas, Hooman Derakhtshani, Emily Panoussi, Ahmed Drata, Jalees Nasir, Michael Surete, Samira Mbaraka, Andrew G. McArthur                                                                                                                                                                                                                                                                                                                                                                                                   |
| EPI_ISL_591270                                                                 | National Institute for Viral Disease Control and Prevention, China CDC                                                                                                                          | National Institute for Viral Disease Control and Prevention, China CDC                                               | Huijia Ma, Zhaoguo Wang, Xiang Zhao, Jun Han, Yong Zhang, Hong Wang, Gao Chen, Ji Wang, Jingdong Song, Yao Meng, Yuchao Wu, Zhixiao Chen, Dayan Wang, Riqun Gao, George F. Cao, Wendu Xu                                                                                                                                                                                                                                                                                                                                                             |
| EPI_ISL_591500                                                                 | Pathology West - NSW Health Pathology                                                                                                                                                           | NSW Health Pathology - Institute of Clinical Pathology and Medical Research, Westmead Hospital, University of Sydney | Gaggero A, Valente F, Gaete A, Travasny D, Palma R, Ura C, Varas M, Aliende ML, Maass A, Gonzalez M, Ferras M, Valente F, Gaete A, Travasny D, Palma R, Ura C, Varas M, Aliende ML, Maass A, Gonzalez M, Ferras M, Seemann T., Schultz, M. B., Sait, M., Sherry, N                                                                                                                                                                                                                                                                                   |
| EPI_ISL_591523, EPI_ISL_591528, EPI_ISL_591530                                 | Medicina Norte U Chile - Servicio Medico Legal                                                                                                                                                  | Center for Mathematical Modeling and Center for Genome Regulation, Santiago, Chile                                   |                                                                                                                                                                                                                                                                                                                                                                                                                                                                                                                                                      |
| EPI_ISL_591531                                                                 | Laboratorio de Infeccologia y Virologia molecular                                                                                                                                               | Center for Mathematical Modeling and Center for Genome Regulation, Santiago, Chile                                   |                                                                                                                                                                                                                                                                                                                                                                                                                                                                                                                                                      |
| EPI_ISL_593018, EPI_ISL_593218                                                 | Microbiological Diagnostic Unit - Public Health Laboratory (MDU-PHL)                                                                                                                            | MDU-PHL                                                                                                              |                                                                                                                                                                                                                                                                                                                                                                                                                                                                                                                                                      |
| EPI_ISL_593538                                                                 | Eastern Ontario Regional Laboratory Association                                                                                                                                                 | McMaster University                                                                                                  | Leanne Morimer, Hooman Derakhtshani, Emily Panoussi, Ahmed Drata, Jalees Nasir, Robert Singer, Andrew G. McArthur                                                                                                                                                                                                                                                                                                                                                                                                                                    |
| EPI_ISL_593857, EPI_ISL_593870, EPI_ISL_593880, EPI_ISL_593893, EPI_ISL_593896 | CHU Purpan - Laboratoire de Virologie - Institut Fédéral de Biologie                                                                                                                            | CHU Purpan - Laboratoire de Virologie - Institut Fédéral de Biologie                                                 | Labour J., Ronger N., Dubois M., Carcenac R., Harter A., Boyer P., Tremoux P., Izopel J.                                                                                                                                                                                                                                                                                                                                                                                                                                                             |
| EPI_ISL_594158, EPI_ISL_594159                                                 | Israel Institute for Biological Research                                                                                                                                                        | Israel Institute for Biological Research                                                                             | Galia Zaid, Inbar Cohen-Gillon, Ofir Israeli, Dana Stern, Shay Weiss, Chiv Lasker, Yoav Gal, Libby Weiss, Emanuelle Mamoud, Adi Beh-Din and Anat Zvi                                                                                                                                                                                                                                                                                                                                                                                                 |
| EPI_ISL_594188                                                                 | Department of Pathology, School of Medicine, Imam Khomeini Hospital, Tehran University of Medical Sciences                                                                                      | Genetics Research Center, University of Social Welfare and Rehabilitation Sciences                                   | Zohreh Farahi, Marziyei Mojtabi, Khatolaj Jalalvand, Azam Ghazizadeh, Seydeh eilham Morfazay, Ali Jafarpour, Azar Haddad, Alireza Abolmohamdi, Ali Jafarpour, Azam Ghazizadeh, Seydeh eilham Morfazay, Saber Soltani, Reza Najafpour, Krima Kahrizi, SeyedMohammad Jazayeri, Hossain Najmabadi                                                                                                                                                                                                                                                       |
| EPI_ISL_594346                                                                 | Florida Bureau of Public Health Laboratories                                                                                                                                                    | Florida Bureau of Public Health Laboratories                                                                         |                                                                                                                                                                                                                                                                                                                                                                                                                                                                                                                                                      |
| EPI_ISL_594828                                                                 | Virology Department, Royal Infirmary of Edinburgh, NHS Lothian / School of Biological Sciences, University of Edinburgh / Institute of Genetics and Molecular Medicine, University of Edinburgh | COVID-19 Genomics UK (COG-UK) Consortium                                                                             | McHugh M, Dewar R, Rooke S, Gallagher M, Balceca C, O'Toole A, Seher E, Hill V, McCorne JT, Colquhoun R, Yu X, Jackson B, Rambaut A, Williams TC, Templeton K                                                                                                                                                                                                                                                                                                                                                                                        |
| EPI_ISL_596230                                                                 | WHO National Influenza Centre Russian Federation                                                                                                                                                | WHO National Influenza Centre Russian Federation                                                                     | Andrey Komissarov, Artem Fadeev, Anna Ivanova, Kseniya Komissarova, Dmitry Bazhenov, Daria Danilenko                                                                                                                                                                                                                                                                                                                                                                                                                                                 |
| EPI_ISL_596254                                                                 | WHO National Influenza Centre Russian Federation                                                                                                                                                | WHO National Influenza Centre Russian Federation                                                                     | Andrey Komissarov, Artem Fadeev, Anna Ivanova, Kseniya Komissarova, Dmitry Bazhenov, Daria Danilenko                                                                                                                                                                                                                                                                                                                                                                                                                                                 |
| EPI_ISL_596267                                                                 | WHO National Influenza Centre Russian Federation                                                                                                                                                | WHO National Influenza Centre Russian Federation                                                                     | Andrey Komissarov, Artem Fadeev, Anna Ivanova, Kseniya Komissarova, Dmitry Bazhenov, Daria Danilenko                                                                                                                                                                                                                                                                                                                                                                                                                                                 |
| EPI_ISL_596280                                                                 | HELIX LCC                                                                                                                                                                                       | WHO National Influenza Centre Russian Federation                                                                     | Andrey Komissarov, Artem Fadeev, Anna Ivanova, Kseniya Komissarova, Dmitry Bazhenov, Daria Danilenko, Nadezhda Kuznetsova, Elena Shchegoleva, Elizaveta Dvornog, Ekaterina Malyshenko, Kirill Krasnozlobovets, Evgeniya Mukasheva, Anna Ignatyeva, Svetlana Truspekova, Aleksey Storchennin, Maria Nikitrova, Andrey Pochinov, Valeria Baschin, Evgeny Usachev, Olga Buragova, Ludmila Kobokhina, Svetlana Smechenna, Elena Barseva, Artem Tschuk, Vladimir Gashchin, Alexander Gintsburg                                                            |
| EPI_ISL_596334                                                                 | Pathogenic Microorganisms Variability Laboratory                                                                                                                                                | WHO National Influenza Centre Russian Federation                                                                     | Andrey Komissarov, Artem Fadeev, Anna Ivanova, Kseniya Komissarova, Dmitry Bazhenov, Daria Danilenko                                                                                                                                                                                                                                                                                                                                                                                                                                                 |
| EPI_ISL_596353                                                                 | WHO National Influenza Centre Russian Federation                                                                                                                                                | WHO National Influenza Centre Russian Federation                                                                     |                                                                                                                                                                                                                                                                                                                                                                                                                                                                                                                                                      |

|                |                                                                                                                                |                                                                                                                                |                                                                                                                                                                                                                                                                                                                                                              |
|----------------|--------------------------------------------------------------------------------------------------------------------------------|--------------------------------------------------------------------------------------------------------------------------------|--------------------------------------------------------------------------------------------------------------------------------------------------------------------------------------------------------------------------------------------------------------------------------------------------------------------------------------------------------------|
| EPI_ISL_596449 | Institute for Medical Research, Infectious Disease Research Centre, National Institutes of Health, Ministry of Health Malaysia | Institute for Medical Research, Infectious Disease Research Centre, National Institutes of Health, Ministry of Health Malaysia | Suppiah J, Kamal K, Mohd-Zawawi Z, Thayyan R                                                                                                                                                                                                                                                                                                                 |
| EPI_ISL_596451 | Department of Pathology, School of Medicine, Imam Khomeini Hospital, Tehran University of Medical Sciences                     | Genetics Research Center, University of Social Welfare and Rehabilitation Sciences                                             | Zohreh Fattahi, Marziye Morseini, Khadijeh Jalilvand, Azam Ghazasadi, Seydeh elham Morfrazavi, Ali Jafarpour, Azam Ghazasadi, Seydeh elham Morfrazavi, Sabar Soltani, Peza Najafpour, Krinia Kahrizi, Seyad Mohammad Jazayeri, Hossain Najmabadi                                                                                                             |
| EPI_ISL_596462 | National Public Health Laboratory, National Centre for Infectious Diseases                                                     | National Public Health Laboratory, National Centre for Infectious Diseases                                                     | Te Wilm Mak, Sophie Octavia, Zhenyang Zhou, Lin Cui, Raymond Tzer Pin Lin                                                                                                                                                                                                                                                                                    |
| EPI_ISL_596507 | Lighthouse Lab in Milton Keynes                                                                                                | Welcome Sanger Institute for the COVID-19 Genomics UK (COG-UK) consortium                                                      | The Lighthouse Lab in Milton Keynes and Alex Alerton, Roberto Amato, Sonia Gonçalves, Ewan Harrison, David K. Jackson, Ian Johnston, Dominic Kwiatkowski, Cordelia Langford, John Hillier on behalf of the Wellcome Sanger Institute COVID-19 Surveillance Team ( <a href="http://www.sanger.ac.uk/covid-team">http://www.sanger.ac.uk/covid-team</a> )      |
| EPI_ISL_596528 | Palestinian Ministry of Health                                                                                                 | Molecular Genetics Lab                                                                                                         | Enilio Margolis-Clark, PhD and Phillip Ruiz, MD, PhD                                                                                                                                                                                                                                                                                                         |
| EPI_ISL_601762 | University of Miami Immunology and Histocompatibility Laboratory                                                               | University of Miami Immunology and Histocompatibility Laboratory                                                               | Andrey Komissarov, Artem Fadeev, Kseniya Komisarova, Anna Ivanova, Dmitry Bazhenov, Daria Danilenko                                                                                                                                                                                                                                                          |
| EPI_ISL_602310 | HELIX LLC                                                                                                                      | WHO National Influenza Centre Russian Federation                                                                               | Chandana leewardara, Deshni Jayatilaka, Dinuka Aiyaratne, Dyanath Pranasinghe, Lakshri Gomes, Ananda Wijewickrama, Malika Karunaratne, Chandani J. Pillay S. Lessells R, Mdilose K, York D, Khan S, Tegally H, Wilkinson E, de Oliveira T                                                                                                                    |
| EPI_ISL_602444 | Centre for Dengue Research, Department of Immunology and Molecular Medicine                                                    | Centre for Dengue Research                                                                                                     | Matt Purnb, Jacob Garfin, Alexandra Lorenz, and Xiong Wang                                                                                                                                                                                                                                                                                                   |
| EPI_ISL_602564 | NHL-S-ILCH                                                                                                                     | KRISPP, KZN Research Innovation and Sequencing Platform                                                                        |                                                                                                                                                                                                                                                                                                                                                              |
| EPI_ISL_602659 | Mayo Clinic & Mayo Clinic Laboratories                                                                                         | Minnesota Department of Health, Public Health Laboratory                                                                       |                                                                                                                                                                                                                                                                                                                                                              |
| EPI_ISL_602840 | Pronto Socorro Dr. Conrado Cesario Nuvolini                                                                                    | Instituto Adolfo Lutz, Interdisciplinary Procedures Center, Strategic Laboratory                                               | Claudio Tavares Sacchi, Claudia Regina Gonçalves, Erica Valessa Ramos Gomes, Karoline Rodrigues Campos                                                                                                                                                                                                                                                       |
| EPI_ISL_603011 | Departamento de Vigilância à Saúde                                                                                             | Instituto Adolfo Lutz, Interdisciplinary Procedures Center, Strategic Laboratory                                               | Claudio Tavares Sacchi, Claudia Regina Gonçalves, Erica Valessa Ramos Gomes, Karoline Rodrigues Campos                                                                                                                                                                                                                                                       |
| EPI_ISL_603021 | Vigilância em Saúde Visa Sul                                                                                                   | Instituto Adolfo Lutz, Interdisciplinary Procedures Center, Strategic Laboratory                                               | Claudio Tavares Sacchi, Claudia Regina Gonçalves, Erica Valessa Ramos Gomes, Karoline Rodrigues Campos                                                                                                                                                                                                                                                       |
| EPI_ISL_603022 | Santa Casa de Misericórdia de Aracatuba                                                                                        | Instituto Adolfo Lutz, Interdisciplinary Procedures Center, Strategic Laboratory                                               | Claudio Tavares Sacchi, Claudia Regina Gonçalves, Erica Valessa Ramos Gomes, Karoline Rodrigues Campos                                                                                                                                                                                                                                                       |
| EPI_ISL_603023 | UPA Central de Caraguatatuba                                                                                                   | Instituto Adolfo Lutz, Interdisciplinary Procedures Center, Strategic Laboratory                                               | Claudio Tavares Sacchi, Claudia Regina Gonçalves, Erica Valessa Ramos Gomes, Karoline Rodrigues Campos                                                                                                                                                                                                                                                       |
| EPI_ISL_603024 | Santa Casa de Misericórdia de Aracatuba                                                                                        | Instituto Adolfo Lutz, Interdisciplinary Procedures Center, Strategic Laboratory                                               | Claudio Tavares Sacchi, Claudia Regina Gonçalves, Erica Valessa Ramos Gomes, Karoline Rodrigues Campos                                                                                                                                                                                                                                                       |
| EPI_ISL_603025 | Santa Casa de Misericórdia de Presidente Prudente                                                                              | Instituto Adolfo Lutz, Interdisciplinary Procedures Center, Strategic Laboratory                                               | Claudio Tavares Sacchi, Claudia Regina Gonçalves, Erica Valessa Ramos Gomes, Karoline Rodrigues Campos                                                                                                                                                                                                                                                       |
| EPI_ISL_603026 | Santa Casa de Misericórdia de Presidente Prudente                                                                              | Instituto Adolfo Lutz, Interdisciplinary Procedures Center, Strategic Laboratory                                               | Claudio Tavares Sacchi, Claudia Regina Gonçalves, Erica Valessa Ramos Gomes, Karoline Rodrigues Campos                                                                                                                                                                                                                                                       |
| EPI_ISL_603027 | Santa Casa de Misericórdia de Aracatuba                                                                                        | Instituto Adolfo Lutz, Interdisciplinary Procedures Center, Strategic Laboratory                                               | Claudio Tavares Sacchi, Claudia Regina Gonçalves, Erica Valessa Ramos Gomes, Karoline Rodrigues Campos                                                                                                                                                                                                                                                       |
| EPI_ISL_603028 | Hospital Municipal Santa Ana                                                                                                   | Instituto Adolfo Lutz, Interdisciplinary Procedures Center, Strategic Laboratory                                               | Claudio Tavares Sacchi, Claudia Regina Gonçalves, Erica Valessa Ramos Gomes, Karoline Rodrigues Campos                                                                                                                                                                                                                                                       |
| EPI_ISL_603029 | Hospital Municipal Mário Gatti                                                                                                 | Instituto Adolfo Lutz, Interdisciplinary Procedures Center, Strategic Laboratory                                               | Claudio Tavares Sacchi, Claudia Regina Gonçalves, Erica Valessa Ramos Gomes, Karoline Rodrigues Campos                                                                                                                                                                                                                                                       |
| EPI_ISL_603030 | Hospital Domingos Leonardo Ceravolo Presidente Prudente                                                                        | Instituto Adolfo Lutz, Interdisciplinary Procedures Center, Strategic Laboratory                                               | Claudio Tavares Sacchi, Claudia Regina Gonçalves, Erica Valessa Ramos Gomes, Karoline Rodrigues Campos                                                                                                                                                                                                                                                       |
| EPI_ISL_603031 | Santa Casa de Presidente Epitácio                                                                                              | Instituto Adolfo Lutz, Interdisciplinary Procedures Center, Strategic Laboratory                                               | Claudio Tavares Sacchi, Claudia Regina Gonçalves, Erica Valessa Ramos Gomes, Karoline Rodrigues Campos                                                                                                                                                                                                                                                       |
| EPI_ISL_603032 | Santa Casa de Misericórdia de Presidente Prudente                                                                              | Instituto Adolfo Lutz, Interdisciplinary Procedures Center, Strategic Laboratory                                               | Claudio Tavares Sacchi, Claudia Regina Gonçalves, Erica Valessa Ramos Gomes, Karoline Rodrigues Campos                                                                                                                                                                                                                                                       |
| EPI_ISL_603033 | Vigilância Epidemiológica de São Bernardo do Campo                                                                             | Instituto Adolfo Lutz, Interdisciplinary Procedures Center, Strategic Laboratory                                               | Claudio Tavares Sacchi, Claudia Regina Gonçalves, Erica Valessa Ramos Gomes, Karoline Rodrigues Campos                                                                                                                                                                                                                                                       |
| EPI_ISL_603034 | Departamento de Vigilância à Saúde                                                                                             | Instituto Adolfo Lutz, Interdisciplinary Procedures Center, Strategic Laboratory                                               | Claudio Tavares Sacchi, Claudia Regina Gonçalves, Erica Valessa Ramos Gomes, Karoline Rodrigues Campos                                                                                                                                                                                                                                                       |
| EPI_ISL_603035 | Secretaria Municipal de Saúde                                                                                                  | Instituto Adolfo Lutz, Interdisciplinary Procedures Center, Strategic Laboratory                                               | Claudio Tavares Sacchi, Claudia Regina Gonçalves, Erica Valessa Ramos Gomes, Karoline Rodrigues Campos                                                                                                                                                                                                                                                       |
| EPI_ISL_603036 | Hospital Santa Ana                                                                                                             | Instituto Adolfo Lutz, Interdisciplinary Procedures Center, Strategic Laboratory                                               | Claudio Tavares Sacchi, Claudia Regina Gonçalves, Erica Valessa Ramos Gomes, Karoline Rodrigues Campos                                                                                                                                                                                                                                                       |
| EPI_ISL_603037 | Hospital Geral de Pedreira                                                                                                     | Instituto Adolfo Lutz, Interdisciplinary Procedures Center, Strategic Laboratory                                               | Claudio Tavares Sacchi, Claudia Regina Gonçalves, Erica Valessa Ramos Gomes, Karoline Rodrigues Campos                                                                                                                                                                                                                                                       |
| EPI_ISL_603038 | Santa Casa de Misericórdia de Aracatuba                                                                                        | Instituto Adolfo Lutz, Interdisciplinary Procedures Center, Strategic Laboratory                                               | Claudio Tavares Sacchi, Claudia Regina Gonçalves, Erica Valessa Ramos Gomes, Karoline Rodrigues Campos                                                                                                                                                                                                                                                       |
| EPI_ISL_603039 | Hospital Municipal Mário Gatti                                                                                                 | Instituto Adolfo Lutz, Interdisciplinary Procedures Center, Strategic Laboratory                                               | Claudio Tavares Sacchi, Claudia Regina Gonçalves, Erica Valessa Ramos Gomes, Karoline Rodrigues Campos                                                                                                                                                                                                                                                       |
| EPI_ISL_603140 | NIMI Lazzaro Spallanzani IRCCS                                                                                                 | NIMI Lazzaro Spallanzani IRCCS                                                                                                 | Martina Rueca, Cesare E.M. Gruber, Francesco Messina, Barbara Bartolini, Emanuela Giombini, Simone Lanini, Antonio Di Caro, Maria R. Capobianchi                                                                                                                                                                                                             |
| EPI_ISL_603157 | NIMI Lazzaro Spallanzani IRCCS                                                                                                 | NIMI Lazzaro Spallanzani IRCCS                                                                                                 | Francesco Messina, Martina Rueca, Barbara Bartolini, Cesare E.M. Gruber, Simone Lanini, Emanuela Giombini, Fulvia Pimpinelli, Antonino Di Caro, Maria R. Capobianchi                                                                                                                                                                                         |
| EPI_ISL_603170 | NIMI Lazzaro Spallanzani IRCCS                                                                                                 | NIMI Lazzaro Spallanzani IRCCS                                                                                                 | Martina Rueca, Barbara Bartolini, Cesare E.M. Gruber, Francesco Messina, Simone Lanini, Emanuela Giombini, Maria R. Capobianchi, Antonino Di Caro                                                                                                                                                                                                            |
| EPI_ISL_603179 | NIMI Lazzaro Spallanzani IRCCS                                                                                                 | NIMI Lazzaro Spallanzani IRCCS                                                                                                 | Cesare E.M. Gruber, Barbara Bartolini, Francesco Messina, Martina Rueca, Emanuela Giombini, Simone Lanini, Antonino Di Caro, Maria R. Capobianchi                                                                                                                                                                                                            |
| EPI_ISL_603183 | NIMI Lazzaro Spallanzani IRCCS                                                                                                 | NIMI Lazzaro Spallanzani IRCCS                                                                                                 | Barbara Bartolini, Francesco Messina, Martina Rueca, Cesare E.M. Gruber, Emanuela Giombini, Simone Lanini, Maria R. Capobianchi, Antonino Di Caro                                                                                                                                                                                                            |
| EPI_ISL_603221 | National Institute of Laboratory Medicine and Referral Center                                                                  | Genomic Research Lab, BCISIR                                                                                                   | Abu Sayeed Mohammad Mahmud, Mohammad Samir, Uzzeam, Eshtar Osman, Md. Ahasan Habib, Shajha Ather, Tanjina Akther Banu, Md. Mursheed Hasan Sarkar, Barna Goswami, Ifrat Idrisi, Md. Saddam Hossain, Tasnim Hafisa, Mki, Maruf Ahmed Molla, Meemuda Yasmin, Assih Kumar Ghosh, A. K. M. Shamsuzzaman, Monira Parveen, Mki, Masum Hossain Arif, Mki, Salim Khan |

|                                                                                                                                                                                                                                |                                                                                                                                                                                                        |                                                                                                                                                                                                                                                                                                                                                                                                                                                                                                                                                         |                                                                                                                                                                                                                                                                                                                                                                                                       |
|--------------------------------------------------------------------------------------------------------------------------------------------------------------------------------------------------------------------------------|--------------------------------------------------------------------------------------------------------------------------------------------------------------------------------------------------------|---------------------------------------------------------------------------------------------------------------------------------------------------------------------------------------------------------------------------------------------------------------------------------------------------------------------------------------------------------------------------------------------------------------------------------------------------------------------------------------------------------------------------------------------------------|-------------------------------------------------------------------------------------------------------------------------------------------------------------------------------------------------------------------------------------------------------------------------------------------------------------------------------------------------------------------------------------------------------|
| EPI_ISL_603241                                                                                                                                                                                                                 | National Institute of Laboratory Medicine and Referral Center                                                                                                                                          | Genomic Research Lab, BCSIR                                                                                                                                                                                                                                                                                                                                                                                                                                                                                                                             | Tarjina Akhter Baru, Abu Sayeed Mohammad Mahmud, Mohammad Samir Uzzaman, Ezzar Osman, Md. Ahasan Habib, Shahina Akter, Md. Muhsin Hasan Sarkar, Bama Goswami, Ifrat Jahan, Md. Saddam Hossain, Tasnim Nafisa, Md. Maruf Ahmed Molia, Mahmuda Yasmin, Ashik Kumar Ghosh, A. K. M. Shamsuzzaman, Monira Parveen, Md. Masum Hossain Arif, Md. Salim Khan                                                 |
| EPI_ISL_603246                                                                                                                                                                                                                 | National Institute of Laboratory Medicine and Referral Center                                                                                                                                          | Genomic Research Lab, BCSIR                                                                                                                                                                                                                                                                                                                                                                                                                                                                                                                             | Md. Saddam Hossain, Abu Sayeed Mohammad Mahmud, Mohammad Samir Uzzaman, Ezzar Osman, Md. Ahasan Habib, Shahina Akter, Tarjina Akhter Baru, Md. Muhsin Hasan Sarkar, Bama Goswami, Ifrat Jahan, Tasnim Nafisa, Md. Maruf Ahmed Molia, Mahmuda Yasmin, Ashik Kumar Ghosh, A. K. M. Shamsuzzaman, Monira Parveen, Md. Masum Hossain Arif, Md. Salim Khan                                                 |
| EPI_ISL_603328, EPI_ISL_603365, EPI_ISL_603429, EPI_ISL_603627                                                                                                                                                                 | Viollier AG                                                                                                                                                                                            | Department of Biosystems Science and Engineering, ETH Zurich                                                                                                                                                                                                                                                                                                                                                                                                                                                                                            | Christian Baisel, Sarah Nadeau, Ivan Topolitsky, Philipp Jablonksi, Susana Posada-Céspedes, Tobias Sotir, Ima Nissen, Natascia Santaroca, Elodie Burchlen, Christiane Beckmann, Maurice Rodondo, Olivier Kobi, Christoph Noppa, Sophie Sadel, Noemie Santamaria de Souza, Niko Beerenwinkel, Tanja Stadler                                                                                            |
| EPI_ISL_605400                                                                                                                                                                                                                 | Utah Public Health Laboratory                                                                                                                                                                          | Utah Public Health Laboratory                                                                                                                                                                                                                                                                                                                                                                                                                                                                                                                           | Erin L. Young, Kelly Oakeson, Tara Gallagher, Michael T. Pyne, E. Susan Sloceta, Melanie A. Melroy, Jeffrey B. Stevenson, Salka M. Shakir, David R. Hillyard                                                                                                                                                                                                                                          |
| EPI_ISL_605783                                                                                                                                                                                                                 | Genome Center                                                                                                                                                                                          | Genome Center                                                                                                                                                                                                                                                                                                                                                                                                                                                                                                                                           | Md. Shazid Hasan, Hassam M. Al-Emran, Ovinu Kripa Islam, A.S. M. Rubayet, Ud. Alam, Selina Akter, Shireen Nigar, Md. Tanvir Islam, Prayas Chandra Roy, Shiron Lal Sarkar, Najmuj Sakta, S. M. Tanjil Shah, Md. Iqbal Kabir Jaid, Md. Avwar Hossain                                                                                                                                                    |
| EPI_ISL_605818, EPI_ISL_605819                                                                                                                                                                                                 | National Public Health Laboratory, National Centre for Infectious Diseases<br>PathWest Laboratory Medicine WA                                                                                          | National Public Health Laboratory, National Centre for Infectious Diseases<br>PathWest Laboratory Medicine WA Microbial Surveillance Unit                                                                                                                                                                                                                                                                                                                                                                                                               | Tze Winn Mak, Sophie Octavia, Zhenyang Zhou, Lin Qui, Raymond Tze Pin Lin                                                                                                                                                                                                                                                                                                                             |
| EPI_ISL_605914                                                                                                                                                                                                                 | NGS Lab, DNA SOLUTION LTD.                                                                                                                                                                             | NGS Lab, DNA SOLUTION LTD.                                                                                                                                                                                                                                                                                                                                                                                                                                                                                                                              | PathWest Laboratory Medicine WA Microbial Surveillance Unit                                                                                                                                                                                                                                                                                                                                           |
| EPI_ISL_606900                                                                                                                                                                                                                 | Lighthouse Lab in Milton Keynes                                                                                                                                                                        | Welcome Sanger Institute for the COVID-19 Genomics UK (COG-UK) consortium                                                                                                                                                                                                                                                                                                                                                                                                                                                                               | Khan, M.I., Hasan, K.N., Surfan, A., Ahsen, M.B., Khaleque, A., Rahman, M., Chowdhury, M., Haider, H.U., Razu, M.H., Khan, M., Rabi, M.F.A.                                                                                                                                                                                                                                                           |
| EPI_ISL_609178                                                                                                                                                                                                                 | Lighthouse Lab in Glasgow                                                                                                                                                                              | Welcome Sanger Institute for the COVID-19 Genomics UK (COG-UK) consortium                                                                                                                                                                                                                                                                                                                                                                                                                                                                               | The Lighthouse Lab in Milton Keynes and Alex Alderton, Roberto Amato, Sonia Goncalves, Ewan Harrison, David K. Jackson, Ian Johnston, Dominic Kwiatkowski, Cordelia Langford, John Sillitoe on behalf of the Wellcome Sanger Institute COVID-19 Surveillance Team                                                                                                                                     |
| EPI_ISL_609820, EPI_ISL_609821                                                                                                                                                                                                 | Unity Health Toronto                                                                                                                                                                                   | Ontario Institute for Cancer Research                                                                                                                                                                                                                                                                                                                                                                                                                                                                                                                   | Harper VanSteenhoven, Yurni Kasali, David Gray, Carol Clugston, Anna Dominiczak and Alex Alderton, Roberto Amato, Sonia Goncalves, Ewan Harrison, David K. Jackson, Ian Johnston, Dominic Kwiatkowski, Cordelia Langford, John Sillitoe on behalf of the Wellcome Sanger Institute COVID-19 Surveillance Team                                                                                         |
| EPI_ISL_609889                                                                                                                                                                                                                 | INMIL Lazzaro Spallanzani IRCCS                                                                                                                                                                        | INMIL Lazzaro Spallanzani IRCCS                                                                                                                                                                                                                                                                                                                                                                                                                                                                                                                         | Ramzi Fatouh, Larissa M. Matukas, Yan Chen, Mark Downing, Tina Otieman, Karel Bosisinot, Wai Sum Siu, Zhi Cui, Le Liu, Samira Mubareka, TIBDN, Ilinca Lungu, Bernard Lam, Jeremy Johns, Paul Krzyzanoski, Richard de Borja, Felicia Vincelli, Phillip Zuzarte, Jared T. Simpson                                                                                                                       |
| EPI_ISL_609993                                                                                                                                                                                                                 | INMIL Lazzaro Spallanzani IRCCS                                                                                                                                                                        | INMIL Lazzaro Spallanzani IRCCS                                                                                                                                                                                                                                                                                                                                                                                                                                                                                                                         | C.E.M Gruber, B. Bartolini, M. Rucca, F. Messina, E. Giombini, A. Di Caro, MR Capobianchi                                                                                                                                                                                                                                                                                                             |
| EPI_ISL_609994                                                                                                                                                                                                                 | INMIL Lazzaro Spallanzani IRCCS                                                                                                                                                                        | INMIL Lazzaro Spallanzani IRCCS                                                                                                                                                                                                                                                                                                                                                                                                                                                                                                                         | E Giombini, M. Rucca, B. Bartolini, C.E.M Gruber, F. Messina, A. Di Caro, MR Capobianchi                                                                                                                                                                                                                                                                                                              |
| EPI_ISL_609998                                                                                                                                                                                                                 | INMIL Lazzaro Spallanzani IRCCS                                                                                                                                                                        | INMIL Lazzaro Spallanzani IRCCS                                                                                                                                                                                                                                                                                                                                                                                                                                                                                                                         | C.E.M Gruber, F. Messina, M. Rucca, B. Bartolini, MR Capobianchi, A. Di Caro                                                                                                                                                                                                                                                                                                                          |
| EPI_ISL_610062                                                                                                                                                                                                                 | University of Michigan Clinical Microbiology Laboratory                                                                                                                                                | Lauring Lab, University of Michigan, Department of Microbiology and Immunology                                                                                                                                                                                                                                                                                                                                                                                                                                                                          | F. Messina, B. Bartolini, M. Rucca, C.E.M Gruber, E. Giombini, A. Di Caro, MR Capobianchi                                                                                                                                                                                                                                                                                                             |
| EPI_ISL_610154                                                                                                                                                                                                                 | Singapore General Hospital                                                                                                                                                                             | Department of Microbiology                                                                                                                                                                                                                                                                                                                                                                                                                                                                                                                              | Valesano                                                                                                                                                                                                                                                                                                                                                                                              |
| EPI_ISL_610160                                                                                                                                                                                                                 | Washington University in St. Louis                                                                                                                                                                     | Washington University in St. Louis                                                                                                                                                                                                                                                                                                                                                                                                                                                                                                                      | Nurdyana Abdul Rahman, Kun Lee Lim, Chenhao Li, Sui Sin Goh, Kenneth Xin Long Chan, Kian Sing Chan, Lynette Oon, Kem Pei Chng, Niranjan Nagajalan, Karrie Ho                                                                                                                                                                                                                                          |
| EPI_ISL_610162                                                                                                                                                                                                                 | RSUD Dr. Tjirowadolo                                                                                                                                                                                   | Genetics Working Group (Pojka Geneik) Faculty of Medicine, Public Health and Nursing Universitas Gadjah Mada (FK-KMK UGM); Disease Investigation Center Wates Ministry of Agriculture Indonesia; Department of Microbiology FK-KMK UGM; Laboratorium Diagnostik Yayasan Tahlia World Mosquito Program (WMP) Yogyakarta Center for Tropical Medicine FK-KMK UGM; Integrated Research Center FK-KMK UGM, Department of Computer Science and Electronics FMIPA UGM; Balai Besar Teknik Kesehatan Lingkungan dan Pengendalian Penyakit (BBTKLKP) Yogyakarta | David Wang, Carey Ann Burnham, Bijal Parikh, Scott Handley, Lindsey Drott, Stephen Tahan                                                                                                                                                                                                                                                                                                              |
| EPI_ISL_610182, EPI_ISL_610194, EPI_ISL_610198, EPI_ISL_610199, EPI_ISL_610205, EPI_ISL_610209, EPI_ISL_610213, EPI_ISL_610217, EPI_ISL_610218, EPI_ISL_610224                                                                 | Department of Health Technology and Informatics, The Hong Kong Polytechnic University                                                                                                                  | Department of Health Technology and Informatics, The Hong Kong Polytechnic University                                                                                                                                                                                                                                                                                                                                                                                                                                                                   | Gunadi, Hendia Wibawa, Marcellus Mohamad S. Hakim, Edwin W. Darmilajaya, Luchang P. Rizki, Erdah Supriyati, Eggi Arguni, Tikik Nuyestuti, Tri Wibawa, Dwi AA Nugrahainingsih, Altiyati, Siswanto, Krisy Iskandar, Nungki Arvorgowati, Irene, Indaryati, Havd Seyawan, Wuryanto, Susana Smanajaya, Alvin Santoso Kalim                                                                                 |
| EPI_ISL_611422                                                                                                                                                                                                                 | Lighthouse Lab in Glasgow                                                                                                                                                                              | Welcome Sanger Institute for the COVID-19 Genomics UK (COG-UK) consortium                                                                                                                                                                                                                                                                                                                                                                                                                                                                               | Su, G.K.-H., Lee, L.-K., Leung, K.S.-S., Leung, U.S.-L., Ng, T.-L., Chan, C.T.-M., Tam, K.K.-G., Lao, H.-Y., Wu, A.K.-L., Yau, M.C.-Y., Lai, Y.W.-M., Fung, K.S.-C., Chau, S.K.-Y., Wong, B.K.-C., To, W.-K., Luk, K., Ho, A.Y.-M., Que, T.-L., Yip, K.-T., Yam, W.C., Shum, D.H.-K., Yip, S.P.                                                                                                       |
| EPI_ISL_612702                                                                                                                                                                                                                 | Wales Specialist Virology Centre Sequencing Lab: Pathogen Genomics Unit                                                                                                                                | COVID-19 Genomics UK (COG-UK) Consortium                                                                                                                                                                                                                                                                                                                                                                                                                                                                                                                | Harper VanSteenhoven, Yurni Kasali, David Gray, Carol Clugston, Anna Dominiczak and Alex Alderton, Roberto Amato, Sonia Goncalves, Ewan Harrison, David K. Jackson, Ian Johnston, Dominic Kwiatkowski, Cordelia Langford, John Sillitoe on behalf of the Wellcome Sanger Institute COVID-19 Surveillance Team ( <a href="http://www.sanger.ac.uk/covid-team">http://www.sanger.ac.uk/covid-team</a> ) |
| EPI_ISL_613457                                                                                                                                                                                                                 | QUARANTINE CAMP                                                                                                                                                                                        | Hong Kong Department of Health                                                                                                                                                                                                                                                                                                                                                                                                                                                                                                                          | Catherine Moore, Johnathan Evans, Laura Gifford, Maljoie Perry, Simon Cortiell, Angela Marchbank, Alec Birchley, Alexander Adams, Amy Gaslin, Bree Gaites Wilcox, Jason Coombes, Joel Soutigante, Lauren Gilbert, Lea Graham, Nicole Facchiari, Sara Kunzrzen-Sommerhayes, Sarah Taylor, Sophie Jones, Sara Ray, Matthew Bill, Joanne Watkins, Sally Corden, Tom Connor                               |
| EPI_ISL_613460                                                                                                                                                                                                                 | Microbiology, Koc University                                                                                                                                                                           | Microbiology, Koc University                                                                                                                                                                                                                                                                                                                                                                                                                                                                                                                            | Ahan K.L., Tsang, Peter C.W., Yip, Eshman T.K., Lam, Rickjason C.W., Chan, Dominic N.C., Tsang, Ozer, B., Nurtop, E., Kuskucu, M.A., Dogan, O., Can, F.                                                                                                                                                                                                                                               |
| EPI_ISL_613557                                                                                                                                                                                                                 | CHRU Pontchaillou - Laboratoire de Virologie 2, rue Henri Le Guilloux                                                                                                                                  | National Reference Center for Viruses of Respiratory Infections, Institut Pasteur, Paris                                                                                                                                                                                                                                                                                                                                                                                                                                                                | Marion Barbet, Sylvie Benhill, Meline Bizard, Angela Bisebeare, Camille Capel, Elenne Simon-Loride, Vincem Enouf, Maud Vanpeere, Sylvie van der Werf, Gisèle Lagatrou                                                                                                                                                                                                                                 |
| EPI_ISL_613958                                                                                                                                                                                                                 | Microbiology, Department of Pathology, St. Bernard's Hospital, Gibraltar Health Authority                                                                                                              | Respiratory Virus Unit, Microbiology Services Colindale, Public Health England                                                                                                                                                                                                                                                                                                                                                                                                                                                                          | PHE Covid Sequencing Team, Dr Nicholas Cortes (Gibraltar), Charlotte Gilborn-Jones (Gibraltar)                                                                                                                                                                                                                                                                                                        |
| EPI_ISL_614203                                                                                                                                                                                                                 | Michigan Department of Health and Human Services, Bureau of Laboratories                                                                                                                               | Michigan Department of Health and Human Services, Bureau of Laboratories                                                                                                                                                                                                                                                                                                                                                                                                                                                                                | Bankership HM, Riner D. Soehnten MK                                                                                                                                                                                                                                                                                                                                                                   |
| EPI_ISL_614298, EPI_ISL_614304, EPI_ISL_614307, EPI_ISL_614308                                                                                                                                                                 | Farose National Reference Laboratory for Fish and Animal Diseases                                                                                                                                      | Farose National Reference Laboratory for Fish and Animal Diseases                                                                                                                                                                                                                                                                                                                                                                                                                                                                                       | Maria Mafurjandottir Dahl, Petra Elisabeth Petersen, Debes Hammerstamb Christiansen                                                                                                                                                                                                                                                                                                                   |
| EPI_ISL_614347, EPI_ISL_614349, EPI_ISL_614351, EPI_ISL_614353, EPI_ISL_614363, EPI_ISL_614371, EPI_ISL_614375, EPI_ISL_614377, EPI_ISL_614381, EPI_ISL_614384, EPI_ISL_614386, EPI_ISL_614387, EPI_ISL_614391, EPI_ISL_614393 | Molecular diagnostic unit for viral haemorrhagic fevers and emerging viruses, Bouake CHU Laboratory<br>Department of Virology and Microbiological Special Diagnostics, Statens Serum Institut, Denmark | Project group Epidemiology of Highly Pathogenic Microorganisms, Robert Koch-Institute<br>Albertsen lab, Department of Chemistry and Bioscience, Aalborg University, Denmark<br>Department of Biostatistics Science and Engineering, ETH Zurich                                                                                                                                                                                                                                                                                                          | Chantal Akoua-Koffi, Diane Bamourou, Elie Anoh, Essia Barahi, Saliatou Karidoula, Giti Schuber, Adjaratou Traoré, Souradé Maté, Monemo Pacome, Coulibaly Mbeagna, Bamba Fatoumata Touré, Kra Oufroué, Fabian Lennartz                                                                                                                                                                                 |
| EPI_ISL_614432, EPI_ISL_614500                                                                                                                                                                                                 | Viollier AG                                                                                                                                                                                            | Department of Biosystems Science and Engineering, ETH Zurich                                                                                                                                                                                                                                                                                                                                                                                                                                                                                            | Christian Baisel, Sarah Nadeau, Ivan Topolitsky, Pedro Ferreira, Philipp Jablonksi, Susana Posada-Céspedes, Tobias Sotir, Ima Nissen, Natascia Santaroca, Elodie Burchlen, Christiane Beckmann, Maurice Rodondo, Olivier Kobi, Christoph Noppa, Sophie Sadel, Noemie Santamaria de Souza,                                                                                                             |
| EPI_ISL_614900                                                                                                                                                                                                                 | Viollier AG                                                                                                                                                                                            | Department of Biosystems Science and Engineering, ETH Zurich                                                                                                                                                                                                                                                                                                                                                                                                                                                                                            |                                                                                                                                                                                                                                                                                                                                                                                                       |



|                                                                                                                                                                |                                                                                                                                                       |                                                                                                                             |                                                                                                                                                                                                                                                                                                                                                                                                                                                                                                                                                                                               |
|----------------------------------------------------------------------------------------------------------------------------------------------------------------|-------------------------------------------------------------------------------------------------------------------------------------------------------|-----------------------------------------------------------------------------------------------------------------------------|-----------------------------------------------------------------------------------------------------------------------------------------------------------------------------------------------------------------------------------------------------------------------------------------------------------------------------------------------------------------------------------------------------------------------------------------------------------------------------------------------------------------------------------------------------------------------------------------------|
| EPI_ISL_615106                                                                                                                                                 | Hälsnätet Klinisk mikrobiologi                                                                                                                        | The Public Health Agency of Sweden                                                                                          | Anna-Malin Linde, Maria Lird Karlberg, Mattias Haukland, Reza Advani, Olov Startström, Oskar Karlsson Lindlöf, Sandra Broddebsson, Petra Edqvist, Mia Blyting, Anna Risberg, Kain Tegmark-Wissell                                                                                                                                                                                                                                                                                                                                                                                             |
| EPI_ISL_615117                                                                                                                                                 | Klinisk mikrobiologi Linköping                                                                                                                        | The Public Health Agency of Sweden                                                                                          | Anna-Malin Linde, Maria Lird Karlberg, Mattias Haukland, Reza Advani, Olov Startström, Oskar Karlsson Lindlöf, Sandra Broddebsson, Petra Edqvist, Mia Blyting, Anna Risberg, Kain Tegmark-Wissell                                                                                                                                                                                                                                                                                                                                                                                             |
| EPI_ISL_615121                                                                                                                                                 | Hospital de Pediatría "Prof. Dr. Juan P Garrahan"                                                                                                     | Hekias                                                                                                                      | Cristian Rohr, Blanca Bunn, Dalmacio Pereyra, Píscala Adobbe, Andrea Mangano, Maria Florencia Fernandez, Fabian Fay, Martin Vazquez                                                                                                                                                                                                                                                                                                                                                                                                                                                           |
| see above                                                                                                                                                      | Department of Virology and Microbiology Special Diagnostics, Statens Serum Institut, Denmark                                                          | Danish Covid-19 Genome Consortium                                                                                           |                                                                                                                                                                                                                                                                                                                                                                                                                                                                                                                                                                                               |
| EPI_ISL_622805                                                                                                                                                 | Patlab Bay of Plenty                                                                                                                                  | Institute of Environmental Science and Research (ESR)                                                                       | Xiaoyun Ren, Matt Storey, Nikki Freed, Muhammad Faisal, Jing Wang, Hernes Perez, Anja Werno, Anje van der Linden, Ario Upton, Chris Mansell, David Hamner, Dragana Drnkovic, Gary McAuliffe, Hana Sofia Anderson, James Usher, Jill Shemwood, Josh Freeman, Julia Howard, Juliet Ely, Mary Dealmeida, Matt Blakiston, Matthew Rogers, Max Bloomfield, Michael Addice, Michele Bains, Sally Roberts, Sarah-Jelenees, Sharnai Muliyil, Sean Morpeh, Susan Taylor, Timothy Blackmore, Vani Sahyredran, Veronica Playle, Virginia Hope, Erasmus Smitt, Lauren Jolly, Olin Stlander, Joep de Gigt  |
| EPI_ISL_622808, EPI_ISL_622809, EPI_ISL_622824, EPI_ISL_622825                                                                                                 | Cantebury Health Laboratories                                                                                                                         | Institute of Environmental Science and Research (ESR)                                                                       | Xiaoyun Ren, Matt Storey, Nikki Freed, Muhammad Faisal, Jing Wang, Hernes Perez, Anja Werno, Anje van der Linden, Ario Upton, Chris Mansell, David Hamner, Dragana Drnkovic, Gary McAuliffe, Hana Sofia Anderson, James Usher, Jill Shemwood, Josh Freeman, Julia Howard, Juliet Ely, Mary Dealmeida, Matt Blakiston, Matthew Rogers, Max Bloomfield, Michael Addice, Michele Bains, Sally Roberts, Sarah-Jelenees, Sharnai Muliyil, Susan Morpeh, Susan Taylor, Timothy Blackmore, Vani Sahyredran, Veronica Playle, Virginia Hope, Erasmus Smitt, Lauren Jolly, Olin Stlander, Joep de Gigt |
| EPI_ISL_622934, EPI_ISL_622937                                                                                                                                 | National Institute for Communicable Diseases of the National Health Laboratory Service                                                                | National Institute for Communicable Diseases of the National Health Laboratory Service                                      | Alam M. Ismail A, Khumalo Z, Kwenda S, Mashai P, Mnyameni F, Mohale T, Subramoney K, Bhiman JN                                                                                                                                                                                                                                                                                                                                                                                                                                                                                                |
| EPI_ISL_623077                                                                                                                                                 | Uppsala klinisk mikrobiologi                                                                                                                          | The Public Health Agency of Sweden                                                                                          | Anna-Malin Linde, Maria Lird Karlberg, Mattias Haukland, Reza Advani, Olov Startström, Oskar Karlsson Lindlöf, Sandra Broddebsson, Petra Edqvist, Mia Blyting, Anna Risberg, Kain Tegmark-Wissell                                                                                                                                                                                                                                                                                                                                                                                             |
| EPI_ISL_623119, EPI_ISL_623143, EPI_ISL_623144, EPI_ISL_623145, EPI_ISL_623147, EPI_ISL_623149, EPI_ISL_623158, EPI_ISL_623161, EPI_ISL_623165                 | Laboratorio de Virologia Molecular / UFFU                                                                                                             | Bioinformatics Laboratory / LNUCC                                                                                           | Carolina M Voloch, Ronaldo S Francisco Jr., Luiz G P de Almeida, Olavio J Brusolini, Cynthia C Cardoso, Alexandra L Gerber, Ana Paula de C Guimarães, Diana Mariani, Covid19-UFFU Workgroup, Luis Cristóvão Porto, Renato S Aguiar, Tereziinha W P P Castinheiras, Orlando C, Ferreira, Anticar Tanuri, Ana Tereza R de Vasconcelos                                                                                                                                                                                                                                                           |
| EPI_ISL_625456                                                                                                                                                 | Virology Unit, Institut Pasteur de Madagascar                                                                                                         | Virology Unit, Institut Pasteur de Madagascar                                                                               | Christian Ramonson, Cara Brook, Norosa Razanajaloro, Vida Anyong, Tisy Randriamandimby, Jean-Michel Herault, Philippe Dussart                                                                                                                                                                                                                                                                                                                                                                                                                                                                 |
| EPI_ISL_625673, EPI_ISL_625674, EPI_ISL_625675, EPI_ISL_625676, EPI_ISL_625678, EPI_ISL_625681                                                                 | Laboratory of Molecular Medicine, University of Magalanes                                                                                             | Centro Asistencial Docente y de Investigación, Universidad de Magalanes                                                     | Razafimanjato, Cristina M, Taro, Josepi L, DaRisi, Soa Fy Andriamandimby, Jean-Michel Herault, Philippe Dussart                                                                                                                                                                                                                                                                                                                                                                                                                                                                               |
| EPI_ISL_625822                                                                                                                                                 | Department of Virology and Microbiological Special Diagnostics, Statens Serum Institut, Denmark                                                       | Albertsen lab, Department of Chemistry and Bioscience, Aalborg University, Denmark                                          | Jorge Gonzalez, Jacqueline Aldridge, Diego Alvarez, Marcelo Navarrete                                                                                                                                                                                                                                                                                                                                                                                                                                                                                                                         |
| EPI_ISL_626231, EPI_ISL_626237                                                                                                                                 | Department of Clinical Microbiology                                                                                                                   | GIGA Medical Genomics                                                                                                       | Danish Covid-19 Genome Consortium                                                                                                                                                                                                                                                                                                                                                                                                                                                                                                                                                             |
| EPI_ISL_626550, EPI_ISL_626554, EPI_ISL_626556                                                                                                                 | Laboratorio de Biología Molecular, Facultad de Medicina, Universidad de Alacant, Copalco Chile/ FONDAP CRQ, Universidad Andrés Bello, Santiago, Chile | Center for Mathematical Modeling and Center for Genome Regulation, Santiago, Chile                                          | Keith Durkin, Maria Atesci, Sébastien Bontems, Raphaël Boreux, Bouchra Boujemla, Céolie Meek, Perrine Mellin, Marie-Pierre Heyvite, Vincent Bours                                                                                                                                                                                                                                                                                                                                                                                                                                             |
| EPI_ISL_626572, EPI_ISL_626575, EPI_ISL_626577, EPI_ISL_626587, EPI_ISL_626592, EPI_ISL_626612                                                                 | The National Institute of Public Health                                                                                                               | State Veterinary Institute Prague                                                                                           | Echeverria C, Manriquez R, Bastias M, Samhuza D, Travisany D, Alencora ML, Maass A, González M, Montecino, M, Oriellana A, Castro E, Menezes C, Nagy A, Yulincova, H, Novakova, L, Trnka, D, Vecerova, J                                                                                                                                                                                                                                                                                                                                                                                      |
| EPI_ISL_627346, EPI_ISL_627402                                                                                                                                 | West of Scotland Specialist Virology Centre, NHSGGC / MFC-University of Glasgow Centre for Virus Research                                             | COVID-19 Genomics UK (COG-UK) Consortium                                                                                    | Ana da Silva Filipe, Natasha Johnson, Kathy Smollett, Daniel Marr, Stephen Carmichael, Lily Tong, Jerna Nichols, Elin Aranday-Cortes, Kyriaki Nantkou, Sarah McConrad, Marc Niebel, Palanve Asamiraparn, Richard Oton, Joseph Higgins, Steena Vattipally, David L Roberts, Alastair Macdonald, Rory Gunnson, Kathy LJ, Igor Stankisli, Natasha Johnson, Rajiv Shah, James Stephens, Antonia Ho, Emma Thomson                                                                                                                                                                                  |
| EPI_ISL_627519, EPI_ISL_627542                                                                                                                                 | Regional Virus Laboratory, Belfast Health and Social Care Trust                                                                                       | COVID-19 Genomics UK (COG-UK) Consortium                                                                                    | Conall McCaughey, James McKenna, Tanya Curran, Susan Feeley, Alison Watt, Ciara Cox, Mairead Connor, Zoltan Molnar, David Simpson, Derek Fairley                                                                                                                                                                                                                                                                                                                                                                                                                                              |
| EPI_ISL_628119, EPI_ISL_628241                                                                                                                                 | Wales Specialist Virology Centre Sequencing lab: Pathogen Genomics Unit                                                                               | COVID-19 Genomics UK (COG-UK) Consortium                                                                                    | Catherine Moore, Johnathan Evans, Laura Gifford, Malorie Perry, Simon Cottrell, Angela Marchbank, Alec Birtchley, Alexander Adams, Amy Gaskin, Bree Gatica-Wilcox, Jason Coombes, Joel Southgate, Lauren Gilbert, Lee Graham, Nicole Frachantini, Sara Kurzmane-Summerhayes, Sarah Taylor, Sophie Jones, Sara Hay, Matthew Bull, Joanne Watkins, Sally Corden, Tom Connor                                                                                                                                                                                                                     |
| EPI_ISL_628329                                                                                                                                                 | Centre for Enzyme Innovation, University of Portsmouth / Translational Research Laboratory, Portsmouth Hospitals NHS Trust                            | COVID-19 Genomics UK (COG-UK) Consortium                                                                                    | Angela Beckett, Yann Bourgeois, Garry Scarlett, Sharon Glynsier, Scott Elliott, Kelly Birkhall, Robert Impy, Alison Lloyd, Sarah Wylie, Eithan Butcher, Anoop Chauhan, Samuel Ratson                                                                                                                                                                                                                                                                                                                                                                                                          |
| EPI_ISL_629007                                                                                                                                                 | Hospitals NHS Trust                                                                                                                                   | NSW Health Pathology - Institute of Clinical Pathology and Medical Research, Westmead Hospital, University of Sydney        | CIDM-PH et al.                                                                                                                                                                                                                                                                                                                                                                                                                                                                                                                                                                                |
| EPI_ISL_629013                                                                                                                                                 | Centro de Biotecnología Vegetal, Universidad Andrés Bello, Center for Genome Regulation                                                               | Center for Mathematical Modeling and Center for Genome Regulation, Santiago, Chile                                          | Bastias M, Samhuza D, Travisany D, Alencora ML, Maass A, González M, Bustos F, Antagada G, Montecino, M, Oriellana A, Castro E, Menezes C, Maximilian Damagnez, Alexander Dilthey, Ashley-Jane Duplessis, Patrick Finzer, Kathrin Hoffmann, Torsten Houwaert, Lisanna Hilse, Malte Kohns Vasconcelos, Marek Kowczak, Nadine Libke, Jessica Nicolai, Klaus Pfleger, Daniel Stralow, Jörg Trimm, Andreas Walker, Tobias Wenemann, Rainer Zetz                                                                                                                                                   |
| EPI_ISL_631304, EPI_ISL_631365                                                                                                                                 | ZOTZ KLIMAS MZZ, Dusekoff-Centrum GPR UBAG für Labormedizin, Genetik, Zytologie, Pathologie                                                           | Center of Medical Microbiology, Virology, and Hospital Hygiene, University of Duesseldorf                                   | Maximilian Damagnez, Alexander Dilthey, Ashley-Jane Duplessis, Eva Heger, Torsten Houwaert, Rolf Kaiser, Florian Klein, Elena Kroops, Malte Kohns Vasconcelos, Jessica Nicolai, Klaus Pfleger, Gibran Rubio Quiñantraras, Sabela Sierra-Aragón, Daniel Stralow, Jörg Trimm, Andreas Walker, Tobias Wenemann                                                                                                                                                                                                                                                                                   |
| EPI_ISL_631394, EPI_ISL_631386                                                                                                                                 | University Hospital Cologne                                                                                                                           | Center of Medical Microbiology, Virology, and Hospital Hygiene, University of Duesseldorf                                   | AWasili, H., Altai, Z., Altijajiri, Z., Abbas, Z.                                                                                                                                                                                                                                                                                                                                                                                                                                                                                                                                             |
| EPI_ISL_632261, EPI_ISL_632262, EPI_ISL_632263, EPI_ISL_632264, EPI_ISL_632265, EPI_ISL_632266, EPI_ISL_632267, EPI_ISL_632269, EPI_ISL_632284, EPI_ISL_632285 | Communicable Disease Laboratory, Public Health Directorate                                                                                            | Communicable Disease Laboratory, Public Health Directorate                                                                  |                                                                                                                                                                                                                                                                                                                                                                                                                                                                                                                                                                                               |
| EPI_ISL_632313                                                                                                                                                 | NU-sjukvården                                                                                                                                         | Clinical Microbiology, Sahlgrenska University Hospital, Erasmus Medical Center                                              | Johan Ringlander, Josefina Olafsson, Hedvig Engström, Jakobsson, Magnus Lindh                                                                                                                                                                                                                                                                                                                                                                                                                                                                                                                 |
| EPI_ISL_632578, EPI_ISL_632635, EPI_ISL_632783, EPI_ISL_632790                                                                                                 | Dutch COVID-19 response team                                                                                                                          | Communicable Disease Laboratory, Public Health Directorate                                                                  | Bas Oude Munnink, David Neuenhuijse, Reina Sikkema, Clarinda Schippenkock, Inga Cheshtakova, Anne van der Linden, Theo Bastepoort, Stefan van Nieuwkoop, Mark Prok, Pascal Laxmond, Corin Swaan, Marlon Hevrick, Madelief Molsters, Mark Stien, Sandra Kempen, Kangga Mubou, Jeroen van Kampen, Jolanda Voermans, Aara Timen, Corine GeurtsvanKessel, Annemiek van der Elk, Richard Molenvkamp, Marlon Koopmans, on behalf of the Dutch national COVID-19 response team.                                                                                                                      |
| EPI_ISL_632904                                                                                                                                                 | Communicable Disease Laboratory, Public Health Directorate                                                                                            | Communicable Disease Laboratory, Public Health Directorate                                                                  | Altai Z., Altijajiri Z., AWasili, H., Abbas, Z.                                                                                                                                                                                                                                                                                                                                                                                                                                                                                                                                               |
| EPI_ISL_632934                                                                                                                                                 | Department of Acute Infectious Diseases Control and Prevention, Yunnan Provincial Center for Disease Control and Prevention                           | Department of Acute Infectious Diseases Control and Prevention, Yunnan Provincial Center for Disease Control and Prevention | Meiling Zhang, Jienan Zhou, Senqian Jia, Xiaonan Zhao, Xiaqing Fu                                                                                                                                                                                                                                                                                                                                                                                                                                                                                                                             |

|                                                                                                                                                |  |                                                                                                                                                                       |                                                                                                                                                                                                                                                                                                                                                                                                                                                                                                                                                             |                                                                                                                                                                                                                                                                                                                                            |
|------------------------------------------------------------------------------------------------------------------------------------------------|--|-----------------------------------------------------------------------------------------------------------------------------------------------------------------------|-------------------------------------------------------------------------------------------------------------------------------------------------------------------------------------------------------------------------------------------------------------------------------------------------------------------------------------------------------------------------------------------------------------------------------------------------------------------------------------------------------------------------------------------------------------|--------------------------------------------------------------------------------------------------------------------------------------------------------------------------------------------------------------------------------------------------------------------------------------------------------------------------------------------|
| EPI_ISL_632937                                                                                                                                 |  | RUSD Saprosan Gunung Kidul                                                                                                                                            | Genetics Working Group (Pojka Genetik), Faculty of Medicine, Public Health and Nursing Universitas Gadjah Mada (FK-KMK UGM); Disease Investigation Center Wailes Ministry of Agriculture Indonesia; Department of Microbiology FK-KMK UGM; Laboratorium Diagnostik Yayasan Tahlia World Mosquito Program (WMPF) Yogyakarta Center for Tropical Medicine FK-KMK UGM; Integrated Research Center FK-KMK UGM, Department of Computer Science and Electronics FMIPA UGM; Balai Besar Teknik Kesehatan Lingkungan dan Pengendalian Penyakit (BBTKLPP) Yogyakarta | Guradi, Hendia Widawa, Marcellus, Mohamad S., Hakim, Edwin W., Danuwijaya, Luthang P., Rizki, Endah Supriati, Eggi Arguni, Tikik Nuryesuli, Tri Wibawa, Dwi AA Nugrahainingsih, Ailahayati, Siswanto, Krisy Iskandar, Nungki Anggorowati, Irene, Indaryati, Havid Setyawan, Eko Darmawan, Maria Patricia Inggriani, Audric Kenny Tedja     |
| EPI_ISL_634846                                                                                                                                 |  | Minnesota Department of Health, Public Health Laboratory                                                                                                              | Minnesota Department of Health, Public Health Laboratory                                                                                                                                                                                                                                                                                                                                                                                                                                                                                                    | Matt Plumb, Jacob Garfin, Alexandra Lorenz, and Xiong Wang                                                                                                                                                                                                                                                                                 |
| EPI_ISL_634880, EPI_ISL_634882, EPI_ISL_634884                                                                                                 |  | Lab voor klinische biologie                                                                                                                                           | Onderzoeksgroep Virologie                                                                                                                                                                                                                                                                                                                                                                                                                                                                                                                                   | Laurens Lambrechts, Nick Vereecke, Marthe Pauwels, Bruno Verhasselt, Lino Vandekerckhove, Hans Nauwynck, Sebastiaan Theunis                                                                                                                                                                                                                |
| EPI_ISL_634896, EPI_ISL_634890                                                                                                                 |  | Lab voor klinische biologie                                                                                                                                           | Onderzoeksgroep Virologie                                                                                                                                                                                                                                                                                                                                                                                                                                                                                                                                   | Nick Vereecke, Laurens Lambrechts, Marthe Pauwels, Bruno Verhasselt, Lino Vandekerckhove, Hans Nauwynck, Sebastiaan Theunis                                                                                                                                                                                                                |
| EPI_ISL_634994, EPI_ISL_635032                                                                                                                 |  | National Health Laboratory Service - Inkei Albert Luthuli Central Hospital (NHLA-ALCH)                                                                                | KRISP - KZN Research Innovation and Sequencing Platform                                                                                                                                                                                                                                                                                                                                                                                                                                                                                                     | Grandhan J. Pillay S., Lesselie K., York D., Khan S., Tegally H., Wilkinson E. de Oliveira T                                                                                                                                                                                                                                               |
| EPI_ISL_635061                                                                                                                                 |  | 1-Laboratory of Microbiology, National Reference Lab, Charles Nicolle Hospital, 2-University of Tunis ElManar, Faculty of Medicine of Tunis, LR99ES09, Tunis, Tunisia | 1-Clinical and Experimental Pharmacology Lab, LR16SP02, National Center of Pharmacovigilance, University of Tunis El Manar, Tunis, Tunisia, 2-Neurodegenerative diseases and psychiatric troubles, LR16SP03, Razi Hospital, University of Tunis El Manar, Tunis, Tunisia, 3- Ministry of Health, National Observatory of New and Emerging Diseases, 1006, Tunis, Tunisia                                                                                                                                                                                    | Ilhem Bouhès-Ben Boubaker, Samah Traboulsi, Nissaf Ben Alya, Maher Kharrat, Ala Ben Kahla, Jalla Ben Khellil, Salma Abd, Sana Terjani, Mouna Ben Sassi, Mouna Sefar, Inem Mkeda, Imen Kaem, Gaies Emma, Soumaya Rammei, Riadh Daghous, Riadh Gaudier                                                                                       |
| EPI_ISL_635074                                                                                                                                 |  | Norwegian Institute of Public Health, Department of Virology                                                                                                          | Norwegian Institute of Public Health, Department of Virology                                                                                                                                                                                                                                                                                                                                                                                                                                                                                                | Kathrine Stene-Johansen, Kamilla Heddeland Insetjord, Hilde Eishaug, Marie Paulsen Madsen, Rasmus Riis Kopperud, Hilde Volian, Karoline Bragstad, Olav Hungnes                                                                                                                                                                             |
| EPI_ISL_635100                                                                                                                                 |  | Department of Medical Microbiology, St. Olavs hospital                                                                                                                | Norwegian Institute of Public Health, Department of Virology                                                                                                                                                                                                                                                                                                                                                                                                                                                                                                | Kathrine Stene-Johansen, Kamilla Heddeland Insetjord, Hilde Eishaug, Marie Paulsen Madsen, Rasmus Riis Kopperud, Hilde Volian, Karoline Bragstad, Olav Hungnes                                                                                                                                                                             |
| EPI_ISL_635116                                                                                                                                 |  | Ostfold Hospital Trust - Kalnes, Centre for Laboratory Medicine, Section for gene technology and infection serology                                                   | Norwegian Institute of Public Health, Department of Virology                                                                                                                                                                                                                                                                                                                                                                                                                                                                                                | Kathrine Stene-Johansen, Kamilla Heddeland Insetjord, Hilde Eishaug, Marie Paulsen Madsen, Rasmus Riis Kopperud, Hilde Volian, Karoline Bragstad, Olav Hungnes                                                                                                                                                                             |
| EPI_ISL_635159                                                                                                                                 |  | Medical Microbiology Unit, Department for Laboratory Medicine, Drammen Hospital, Vestre Viken Health Trust,                                                           | Norwegian Institute of Public Health, Department of Virology                                                                                                                                                                                                                                                                                                                                                                                                                                                                                                | Kathrine Stene-Johansen, Kamilla Heddeland Insetjord, Hilde Eishaug, Marie Paulsen Madsen, Rasmus Riis Kopperud, Hilde Volian, Karoline Bragstad, Olav Hungnes                                                                                                                                                                             |
| EPI_ISL_635185                                                                                                                                 |  | Ostfold Hospital Trust - Kalnes, Centre for Laboratory Medicine, Section for gene technology and infection serology                                                   | Norwegian Institute of Public Health, Department of Virology                                                                                                                                                                                                                                                                                                                                                                                                                                                                                                | Kathrine Stene-Johansen, Kamilla Heddeland Insetjord, Hilde Eishaug, Marie Paulsen Madsen, Rasmus Riis Kopperud, Hilde Volian, Karoline Bragstad, Olav Hungnes                                                                                                                                                                             |
| EPI_ISL_635189                                                                                                                                 |  | Hospital of Southern Norway - Kristiansand, Department of Medical Microbiology                                                                                        | Norwegian Institute of Public Health, Department of Virology                                                                                                                                                                                                                                                                                                                                                                                                                                                                                                | Kathrine Stene-Johansen, Kamilla Heddeland Insetjord, Hilde Eishaug, Marie Paulsen Madsen, Rasmus Riis Kopperud, Hilde Volian, Karoline Bragstad, Olav Hungnes                                                                                                                                                                             |
| EPI_ISL_635454                                                                                                                                 |  | San Diego County Public Health Laboratory                                                                                                                             | Andersen lab at Scripps Research                                                                                                                                                                                                                                                                                                                                                                                                                                                                                                                            | SEARCH Alliance San Diego with Tracy Bastier, Jovan Shephard, Brett Ausin                                                                                                                                                                                                                                                                  |
| EPI_ISL_635480, EPI_ISL_635486, EPI_ISL_635491, EPI_ISL_635506, EPI_ISL_635512, EPI_ISL_635533, EPI_ISL_635549, EPI_ISL_635573, EPI_ISL_635574 |  | Centro de Diagnostico COVID-19 UMBC Tilman                                                                                                                            | Andersen lab at Scripps Research                                                                                                                                                                                                                                                                                                                                                                                                                                                                                                                            | SEARCH Alliance San Diego with Tracy Bastier, Jovan Shephard, Brett Ausin                                                                                                                                                                                                                                                                  |
| EPI_ISL_635778, EPI_ISL_635779, EPI_ISL_635781                                                                                                 |  | Biolabs Diagnostic Laboratories                                                                                                                                       | Andersen lab at Scripps Research                                                                                                                                                                                                                                                                                                                                                                                                                                                                                                                            | SEARCH Alliance San Diego with Tracy Bastier, Jovan Shephard, Brett Ausin                                                                                                                                                                                                                                                                  |
| EPI_ISL_635953                                                                                                                                 |  | San Diego County Public Health Laboratory                                                                                                                             | Andersen lab at Scripps Research                                                                                                                                                                                                                                                                                                                                                                                                                                                                                                                            | SEARCH Alliance San Diego with Tracy Bastier, Jovan Shephard, Brett Ausin                                                                                                                                                                                                                                                                  |
| EPI_ISL_636300                                                                                                                                 |  | Biolabs Diagnostic Laboratories                                                                                                                                       | Andersen lab at Scripps Research                                                                                                                                                                                                                                                                                                                                                                                                                                                                                                                            | SEARCH Alliance San Diego with Tracy Bastier, Jovan Shephard, Brett Ausin                                                                                                                                                                                                                                                                  |
| EPI_ISL_636514, EPI_ISL_636518, EPI_ISL_636519, EPI_ISL_636557, EPI_ISL_636578, EPI_ISL_636603                                                 |  | Dutch COVID-19 response team                                                                                                                                          | National Institute for Public Health and the Environment (RIVM)                                                                                                                                                                                                                                                                                                                                                                                                                                                                                             | Adam Meijer, Harry Vermeena, Jeroen Oremie, Sharon van den Brink, Bas van der Veer, AnneMieke van den Brandt, Florian Zwagemaker, Dennis Schmitz, Chantal Reuskens, on behalf of the national COVID-19 response team                                                                                                                       |
| EPI_ISL_636604                                                                                                                                 |  | Lithuanian University of Health Sciences Hospital, Department of Laboratory Medicine                                                                                  | Lithuanian University of Health Sciences, Molecular cardiology lab                                                                                                                                                                                                                                                                                                                                                                                                                                                                                          | Lukas Zemanis, Ingrida Orendrait, Arnoldas Pautienus, Kamile Tamusauskaite, Dovydas Geogys, Laura Pareckaitė, Vaiva Lesauskaite, Astra Vilkauškiene                                                                                                                                                                                        |
| EPI_ISL_636607                                                                                                                                 |  | Department of Clinical Microbiology                                                                                                                                   | GIGA Medical Genomics                                                                                                                                                                                                                                                                                                                                                                                                                                                                                                                                       | Keith Durkin, Maria Artesi, Sébastien Bontems, Raphaël Boreux, Bouchna Boujemia, Céolie Meek, Perrrette Mellin, Marie-Pierre Hayette, Vincent Bours                                                                                                                                                                                        |
| EPI_ISL_636737                                                                                                                                 |  | Laboratório de Imunofarmacologia - Instituto Oswaldo Cruz                                                                                                             | Laboratório de Imunofarmacologia - Instituto Oswaldo Cruz                                                                                                                                                                                                                                                                                                                                                                                                                                                                                                   | Souza, T.M., Frieleman-Rodrigues,N., De Paula,A.D., Saravá,F.B., Ferreira,M.A. and Sacramento,C.O.                                                                                                                                                                                                                                         |
| EPI_ISL_636740, EPI_ISL_636781                                                                                                                 |  | National Centre for Disease control (NCDC)                                                                                                                            | NCDC/CSIR-IGIB                                                                                                                                                                                                                                                                                                                                                                                                                                                                                                                                              | Mahesh S. Dhart *, Bharathram Uppilliz *, Robi Manwal *, Pooja Sharma **, Radhakrishnan VS, Vivekanand A, Nishu Tyagi, Shaista Khan, Simmi Tiwari, Mamish Kumar, Ajit Shewale, Ishaq Ahmed Asangla Kamal, Aparna Swaminathan, Saruchi Wadhwa, Tushtar Nile, Sandhya Kabra, Sajeet Singh, Mohammed Faruq#, Anurag Agrawal#, Partha Rakshit# |
| EPI_ISL_636835, EPI_ISL_636837                                                                                                                 |  | Laboratório de Imunofarmacologia - Instituto Oswaldo Cruz                                                                                                             | Laboratório de Imunofarmacologia - Instituto Oswaldo Cruz                                                                                                                                                                                                                                                                                                                                                                                                                                                                                                   | Souza, T.M., Frieleman-Rodrigues,N., De Paula,A.D., Saravá,F.B., Ferreira,M.A. and Sacramento,C.O.                                                                                                                                                                                                                                         |
| EPI_ISL_636841, EPI_ISL_636845, EPI_ISL_636857, EPI_ISL_636863, EPI_ISL_636873, EPI_ISL_636877, EPI_ISL_636887                                 |  | Lithuanian University of Health Sciences Hospital, Department of Laboratory Medicine                                                                                  | Lithuanian University of Health Sciences, Molecular cardiology lab                                                                                                                                                                                                                                                                                                                                                                                                                                                                                          | Lukas Zemanis, Ingrida Orendrait, Arnoldas Pautienus, Kamile Tamusauskaite, Dovydas Geogys, Laura Pareckaitė, Vaiva Lesauskaite, Asta Vilkauškiene                                                                                                                                                                                         |
| EPI_ISL_636964                                                                                                                                 |  | Pathogen Genomics Lab King Abdullah University of Science and Technology(KAUST)                                                                                       | Pathogen Genomics Lab King Abdullah University of Science and Technology(KAUST)                                                                                                                                                                                                                                                                                                                                                                                                                                                                             | Rahul P Salunke, Sharif Hala, Rameez Nabeem, Sara Mareri, Amit Kumar Subudhi, Amanda Ooi, Luke Essu, Fadwa Alofi, Fatima Ben Rached, Atrah                                                                                                                                                                                                 |
| EPI_ISL_636965                                                                                                                                 |  | Pathogen Genomics Lab King Abdullah University of Science and Technology(KAUST)                                                                                       | Pathogen Genomics Lab King Abdullah University of Science and Technology(KAUST)                                                                                                                                                                                                                                                                                                                                                                                                                                                                             | Rameez Nabeem, Rahul P Salunke, Sharif Hala, Sara Mareri, Amit Kumar Subudhi, Fadwa Alofi, Fatima Ben Rached, Atrah Alsomali, Asim Khogeer, Ahmad Bakur Mahmood, Awyar Hashem, Naf Almomtashiri, Anab Pain                                                                                                                                 |
| EPI_ISL_636972                                                                                                                                 |  | Pathogen Genomics Lab King Abdullah University of Science and Technology(KAUST)                                                                                       | Pathogen Genomics Lab King Abdullah University of Science and Technology(KAUST)                                                                                                                                                                                                                                                                                                                                                                                                                                                                             | Fatima Ben Rached, Rameez Nabeem, Sharif Hala, Rahul P Salunke, Sara Mareri, Amit Kumar Subudhi, Atrah Alsomali, Asim Khogeer, Ahmad Bakur Mahmood, Awyar Hashem, Naf Almomtashiri, Anab Pain                                                                                                                                              |
| EPI_ISL_636977                                                                                                                                 |  | HP Pamba                                                                                                                                                              | KRISP - KZN Research Innovation and Sequencing Platform                                                                                                                                                                                                                                                                                                                                                                                                                                                                                                     | Atrah Alsomali, Fatima Ben Rached, Rameez Nabeem, Sharif Hala, Bahni P Salunke, Amanda Ooi, Luke Essu, Sara Mareri, Amit Kumar Subudhi, Fadwa Alofi, Asim Khogeer, Khalid Alghifhani, Awyar Hashem, Naf Almomtashiri, Anab Pain                                                                                                            |
| EPI_ISL_636980                                                                                                                                 |  | CS Xai Xai                                                                                                                                                            | KRISP - KZN Research Innovation and Sequencing Platform                                                                                                                                                                                                                                                                                                                                                                                                                                                                                                     | ismael N. Grandhan J. Pillay S., Tegally H., Wilkinson E. de Oliveira T., Nadia Sloce, Paulo Ananido, Nedio Mabunda                                                                                                                                                                                                                        |



|                                                                                                                                                                                |                                                                                                                                                                                                                                                                           |                                                                                                                                                                                                                                                                                                          |                                                                                                                                                                                                                                                                                                                                                                                                                                                                                                                                                                                                       |
|--------------------------------------------------------------------------------------------------------------------------------------------------------------------------------|---------------------------------------------------------------------------------------------------------------------------------------------------------------------------------------------------------------------------------------------------------------------------|----------------------------------------------------------------------------------------------------------------------------------------------------------------------------------------------------------------------------------------------------------------------------------------------------------|-------------------------------------------------------------------------------------------------------------------------------------------------------------------------------------------------------------------------------------------------------------------------------------------------------------------------------------------------------------------------------------------------------------------------------------------------------------------------------------------------------------------------------------------------------------------------------------------------------|
| EPI_ISL_644311, EPI_ISL_644336, EPI_ISL_644337, EPI_ISL_644341                                                                                                                 | CEPHB / Vincent's Hospital                                                                                                                                                                                                                                                | Irish Coronavirus Sequencing Consortium - National Virus Reference Laboratory                                                                                                                                                                                                                            | Michael Carr, Gabriel Gonzalez, Alejandro Abner Garcia Leon, Patrick Mallon                                                                                                                                                                                                                                                                                                                                                                                                                                                                                                                           |
| EPI_ISL_644491, EPI_ISL_644504, EPI_ISL_644549                                                                                                                                 | MEPH, Aix Marseille University<br>Department of Clinical Microbiology                                                                                                                                                                                                     | MEPH, Aix Marseille University<br>GIGA Medical Genomics                                                                                                                                                                                                                                                  | Anthony LEVASSEUR                                                                                                                                                                                                                                                                                                                                                                                                                                                                                                                                                                                     |
| EPI_ISL_644672                                                                                                                                                                 | Institute for Medical Research, Infectious Disease Research Centre, National Institutes of Health, Ministry of Health Malaysia<br>Osmania Medical College                                                                                                                 | Institute for Medical Research, Infectious Disease Research Centre, National Institutes of Health, Ministry of Health Malaysia<br>CSIR Centre for Cellular and Molecular Biology                                                                                                                         | Keith Durkin, Maria Artesi, Sébastien Bontems, Raphaël Boreux, Bouchnra Boujemla, Cécile Meek, Perrilette Mellin, Marie-Pierre Heyvèle, Vincent Bours<br>Supplian J, Kamel K, Mohd-Zawawi Z, Thayan R                                                                                                                                                                                                                                                                                                                                                                                                 |
| EPI_ISL_644715                                                                                                                                                                 | National Microbiology Reference Laboratory                                                                                                                                                                                                                                | Quadrant Institute Bioscience                                                                                                                                                                                                                                                                            | D. V. Sudha Rani, Dr. S. Pavani, Dr. Satyaprasad D. P. Shashikala Reddy, Tulasi Nagabandi, Namami Gaur, Saksin Shamshavilamuk Zayent, Shaquita Khan, Nikhil Hegirnis M Soujanya Reddy, Preethusa Meccota Purushotham Vedula Blessy B John, Vignagthe S L B Himansi Paval Mukherjee, Soila Banu, Priya Singi, Anvraa Banarjee, Siva Karthik Bharadwaj, Tallapak, Rakesh K Mishra, Divya Tej Sompalli                                                                                                                                                                                                   |
| EPI_ISL_644800, EPI_ISL_644812                                                                                                                                                 | Department of Infectious Diseases, Keio University<br>School of Medicine, Tokyo, Japan                                                                                                                                                                                    | Center for Medical Genetics, Keio University School of Medicine, Tokyo, Japan                                                                                                                                                                                                                            | Thanh Le Viet, Andrew J. Page, Justin O'Grady, Gemma Kay, David Baker, Gaetan Thillier, Ana Victoria Gutierrez, Robert Kingsley, Leonardo de Oliveira Martins, Sekesai Zinyowera, Talenda Takemwa, Mulhanza Mugabe, Gibson Mhangwa, Porita Manangazira, Andrew Taruwa, Hiana Gumbo, Agnes Juru, Charles Nyaguru, Alexander Goredema, Isaoa Piriri, Barbra Muriwa, Bandy Makamure, Taplanamei Mashie<br>Kenjiro Kosaki, Yuka Iwasaki, Hirotsugu Ishizu, Haruhiko Sironi, Kodai Abe                                                                                                                     |
| EPI_ISL_644935, EPI_ISL_644936, EPI_ISL_644950, EPI_ISL_644951, EPI_ISL_644952, EPI_ISL_644958, EPI_ISL_644962, EPI_ISL_644965, EPI_ISL_644991, EPI_ISL_644993                 | Human Genome Variation Research Group, Malopolska Centre of Biotechnology<br>National Public Health Laboratory, National Centre for Infectious Diseases<br>CHU Nîmes                                                                                                      | Human Genome Variation Research Group, Malopolska Centre of Biotechnology<br>National Public Health Laboratory, National Centre for Infectious Diseases<br>CNR Virus des Infectons Respiratoires - France SUD                                                                                            | Kowalski M., Pospiech E., Kajmow A., Gronowicki T., Pisarek A., Marszałek K., Kopera K., Foremy J., Swadzba J., Sanak M., Owczarek K., Dabrowska A., Szczepanski A., Botwiniak P., Pyrc K., Barwicki W.<br>Tze Wlin Mak, Sophie Octavia, Zhenyang Zhou, Lin Cui, Raymond Tzer Pin Lin                                                                                                                                                                                                                                                                                                                 |
| EPI_ISL_645118, EPI_ISL_645129                                                                                                                                                 | The Public Health Agency of Sweden<br>SLAB                                                                                                                                                                                                                                | The Public Health Agency of Sweden<br>Laboratorio Mixto de Biotecnología Académica (LIMBA)                                                                                                                                                                                                               | Anna-Malin Linde, Maria Lind Karlberg, Mattias Haukland, Reza Advari, Olov Startström, Oskar Karlsson Lindjö, Sandra Brodsson, Petra Edquist, Mia Björling, Anna Risberg, Kain Tegmark-Wisell<br>Joaquín Espoleta, Ignacio García Labart, Victoria Paster, Vanina Villanova, Pablo Casali, Sofía Lavista Llamas, Federico Remes Lencov, Ana Paleta, Flavio Spedale, Augustin Cerrí, Silvana Spinelli, Elisa Bolletti, Diego Chouly, María Ra Gascón Varela, Ana Cavatorta, Juliana Acosta, Javier Murillo, Laura Angoleto, Leandro Ciappina, Pilar Buzaco, Adriana Gri, Silvia Aranz, Elizabeth Tapia |
| EPI_ISL_648143, EPI_ISL_648187                                                                                                                                                 | Department of Laboratory Medicine, Tan Tock Seng Hospital                                                                                                                                                                                                                 | Department of Laboratory Medicine, Tan Tock Seng Hospital                                                                                                                                                                                                                                                | Carlos Cortes, Claudia Daubenberger, Adrian Egli, Guillermo Garcia, Salome Hosch, Bonifacio Manguike Niavo, Alfredo Marí, Maximilian Mjina, Elizabeth Nyakarungu, Diosdado Odjama Nseng Ada, Milcha Ordo O Ayekeba, Tim Roofli, Tobias Schindler, Helena Seth-Smith, Madlen Stange, Philipp Wunder Pflü                                                                                                                                                                                                                                                                                               |
| EPI_ISL_648217                                                                                                                                                                 | The Public Health Agency of Sweden                                                                                                                                                                                                                                        | The Public Health Agency of Sweden                                                                                                                                                                                                                                                                       | Chen YYC, Zair X, Lim JX, Li C, Tang WY, Maurer-Stroh S, Barkham TMS, Nagarajan N, Sessions OM                                                                                                                                                                                                                                                                                                                                                                                                                                                                                                        |
| EPI_ISL_648305, EPI_ISL_648324, EPI_ISL_648327, EPI_ISL_648338, EPI_ISL_648343, EPI_ISL_648347, EPI_ISL_648350, EPI_ISL_648367                                                 | Laboratorio de Investigaciones de Barney                                                                                                                                                                                                                                  | University Hospital Basel, Clinical Bacteriology                                                                                                                                                                                                                                                         | Caros Cortes, Claudia Daubenberger, Adrian Egli, Guillermo Garcia, Salome Hosch, Bonifacio Manguike Niavo, Alfredo Marí, Maximilian Mjina, Elizabeth Nyakarungu, Diosdado Odjama Nseng Ada, Milcha Ordo O Ayekeba, Tim Roofli, Tobias Schindler, Helena Seth-Smith, Madlen Stange, Philipp Wunder Pflü                                                                                                                                                                                                                                                                                                |
| EPI_ISL_648673, EPI_ISL_648690, EPI_ISL_648702, EPI_ISL_648711, EPI_ISL_648720, EPI_ISL_648729, EPI_ISL_648741, EPI_ISL_648773, EPI_ISL_648795, EPI_ISL_648795, EPI_ISL_648817 | Department of Laboratory Medicine, Tan Tock Seng Hospital<br>University of Michigan Clinical Microbiology Laboratory<br>AI-Quds Nutrition and Health Research Institute, AI-Quds University<br>Queen Astrid Military Hospital<br>Laboratorio de Investigaciones de Barney | Department of Laboratory Medicine, Tan Tock Seng Hospital<br>Lauring Lab, University of Michigan, Department of Microbiology and Immunology<br>AI-Quds Nutrition and Health Research Institute, AI-Quds University<br>Institute of Tropical Medicine<br>University Hospital Basel, Clinical Bacteriology | Harper VanSteenhouse, Yumi Kasai, David Gray, Carol O'Clung, Anna Dominiczak and Alex Alderton, Roberto Amato, Sonia Goncalves, Ewan Harrison, David K. Jackson, Ian Johnston, Dominic Kwiatkowski, Cordelia Langford, John Sillito on behalf of the Wellcome Sanger Institute COVID-19 Surveillance Team ( <a href="http://www.sanger.ac.uk/covid19team">http://www.sanger.ac.uk/covid19team</a> )<br>PHE Covid Sequencing Team                                                                                                                                                                      |
| EPI_ISL_649058                                                                                                                                                                 | University of Michigan Clinical Microbiology Laboratory                                                                                                                                                                                                                   | Lauring Lab, University of Michigan, Department of Microbiology and Immunology                                                                                                                                                                                                                           | Philippe Seihorst, Colin Anthony                                                                                                                                                                                                                                                                                                                                                                                                                                                                                                                                                                      |
| EPI_ISL_649153                                                                                                                                                                 | AI-Quds Nutrition and Health Research Institute, AI-Quds University                                                                                                                                                                                                       | AI-Quds Nutrition and Health Research Institute, AI-Quds University                                                                                                                                                                                                                                      | Nasereddin A., Ereqat S. and Al-Jawabren A.                                                                                                                                                                                                                                                                                                                                                                                                                                                                                                                                                           |
| EPI_ISL_649154                                                                                                                                                                 | Queen Astrid Military Hospital                                                                                                                                                                                                                                            | Institute of Tropical Medicine                                                                                                                                                                                                                                                                           |                                                                                                                                                                                                                                                                                                                                                                                                                                                                                                                                                                                                       |
| EPI_ISL_649164, EPI_ISL_649170, EPI_ISL_649172                                                                                                                                 | Laboratorio de Investigaciones de Barney                                                                                                                                                                                                                                  | University Hospital Basel, Clinical Bacteriology                                                                                                                                                                                                                                                         | Caros Cortes, Claudia Daubenberger, Adrian Egli, Guillermo Garcia, Salome Hosch, Bonifacio Manguike Niavo, Alfredo Marí, Maximilian Mjina, Elizabeth Nyakarungu, Diosdado Odjama Nseng Ada, Milcha Ordo O Ayekeba, Tim Roofli, Tobias Schindler, Helena Seth-Smith, Madlen Stange, Philipp Wunder Pflü                                                                                                                                                                                                                                                                                                |
| EPI_ISL_649724                                                                                                                                                                 | Lighthouse Lab in Glasgow                                                                                                                                                                                                                                                 | Wellcome Sanger Institute for the COVID-19 Genomics UK (COG-UK) Consortium                                                                                                                                                                                                                               | Harper VanSteenhouse, Yumi Kasai, David Gray, Carol O'Clung, Anna Dominiczak and Alex Alderton, Roberto Amato, Sonia Goncalves, Ewan Harrison, David K. Jackson, Ian Johnston, Dominic Kwiatkowski, Cordelia Langford, John Sillito on behalf of the Wellcome Sanger Institute COVID-19 Surveillance Team ( <a href="http://www.sanger.ac.uk/covid19team">http://www.sanger.ac.uk/covid19team</a> )<br>PHE Covid Sequencing Team                                                                                                                                                                      |
| EPI_ISL_649891                                                                                                                                                                 | Respiratory Virus Unit, Microbiology Services Colindale, Public Health England                                                                                                                                                                                            | COVID-19 Genomics UK (COG-UK) Consortium                                                                                                                                                                                                                                                                 |                                                                                                                                                                                                                                                                                                                                                                                                                                                                                                                                                                                                       |
| EPI_ISL_651940                                                                                                                                                                 | West of Scotland Specialist Virology Centre, NHSGGC / MRC-University of Glasgow Centre for Virus Research                                                                                                                                                                 | COVID-19 Genomics UK (COG-UK) Consortium                                                                                                                                                                                                                                                                 | Ana da Silva Filipe, Natasha Johnson, Kathy Smollett, Daniel Mair, Stephen Carmichael, Alice Boos, Lily Tong, Jenna Nichols, Kyriaki Nomioku, Sarah McDonald, Richard Orton, Joseph Hughes, Steen Vainkilly, David L Robertson, Alasdair MacLean, Roy Gunson, Sharif Shaaban, Matthew Holden, Rachel Blacow, Guy Mollett, Kathy Li, James Shepherd, Antonia Ho, Emma Thomson                                                                                                                                                                                                                          |
| EPI_ISL_652028                                                                                                                                                                 | Virology Department, Royal Infirmary of Edinburgh, NHS Lothian / School of Biological Sciences, University of Edinburgh / Institute of Genetics and Molecular Medicine, University of Edinburgh                                                                           | COVID-19 Genomics UK (COG-UK) Consortium                                                                                                                                                                                                                                                                 | McHugh M, Dewar R, Rodee S, Gallagher M, Balcaza C, O'Toole A, Schee E, Hill V, McCrone JT, Colquhoun R, Yi X, Jackson B, Rambaut A, Williams TC, Templeton K                                                                                                                                                                                                                                                                                                                                                                                                                                         |
| EPI_ISL_652315                                                                                                                                                                 | Regional Virus Laboratory, Belfast Health and Social Care Trust                                                                                                                                                                                                           | COVID-19 Genomics UK (COG-UK) Consortium                                                                                                                                                                                                                                                                 | Conall McCaughey, James McKenna, Tanya Curran, Susan Feevery, Alison Watt, Ciara Cox, Mairead Connor, Zolhan Molnar, David Simpson, Derek Fairley                                                                                                                                                                                                                                                                                                                                                                                                                                                     |
| EPI_ISL_653746, EPI_ISL_653754, EPI_ISL_653755, EPI_ISL_653757                                                                                                                 | Instituto Nacional de Salud, Bogotá, Colombia                                                                                                                                                                                                                             | Instituto Nacional de Salud, Bogotá, Colombia                                                                                                                                                                                                                                                            | Katherine Laton-Donato, Diego A. Alvarez-Diaz, Carlos Franco-Muñoz, Mauricio Pacheco-Montealegre, Jonathan Peales, Diego Andrés Prada, Jose A. Urme-Ciro, Zulma M. Cucunubá, Christian Julián Villabona-Arenas, Liz Villabona-Arenas, Susy Echeverria, Astrid C. Florez, Carolina Ferro, Diana Marcela Walters-Acero, Franklin Pinedo, Carlos Andrés Durán, Mariana Lucia Ospina Martínez, Marcela Mercado-Redondo<br>Parisi A., Bianco A., Capozzi L., Del Sambro L., Lippolis A., Notaricicola M., Manzulli V., Rondinone V., Pace L.                                                               |
| EPI_ISL_653765                                                                                                                                                                 | I.R.C.C.S. "S. De Bellis" - Ente Ospedaliero                                                                                                                                                                                                                              | Istituto Zooprofilattico Sperimentale della Puglia e della Basilicata                                                                                                                                                                                                                                    | Parisi A., Bianco A., Capozzi L., Del Sambro L., Manzulli V., Rondinone V., Pace L., Ciolletta D., Galante D.                                                                                                                                                                                                                                                                                                                                                                                                                                                                                         |
| EPI_ISL_653785                                                                                                                                                                 | Istituto Zooprofilattico Sperimentale della Puglia e della Basilicata                                                                                                                                                                                                     | Istituto Zooprofilattico Sperimentale della Puglia e della Basilicata                                                                                                                                                                                                                                    |                                                                                                                                                                                                                                                                                                                                                                                                                                                                                                                                                                                                       |
| EPI_ISL_653821                                                                                                                                                                 | I.R.C.C.S. "S. De Bellis" - Ente Ospedaliero                                                                                                                                                                                                                              | Istituto Zooprofilattico Sperimentale della Puglia e della Basilicata                                                                                                                                                                                                                                    | Parisi A., Bianco A., Capozzi L., Del Sambro L., Lippolis A., Notaricicola M., Ciolletta D., Galante D.                                                                                                                                                                                                                                                                                                                                                                                                                                                                                               |
| EPI_ISL_653857                                                                                                                                                                 | Maulana Azad Medical College                                                                                                                                                                                                                                              | National Institute of Biomedical Genomics                                                                                                                                                                                                                                                                | Arindam Mitra, Sonal Saxena, Vikas Manchanda, Oves Siddiqui, Saumitra Das                                                                                                                                                                                                                                                                                                                                                                                                                                                                                                                             |
| EPI_ISL_653916                                                                                                                                                                 | Diagnostic and Research Institute of Pathology, Medical University of Graz                                                                                                                                                                                                | Diagnostic and Research Institute of Pathology, Medical University of Graz                                                                                                                                                                                                                               | Karl Kaschler, Peter Frejting, Martin Zacharias, Gregor Gönkwicz                                                                                                                                                                                                                                                                                                                                                                                                                                                                                                                                      |
| EPI_ISL_653926                                                                                                                                                                 | Molecular diagnostic laboratory of Federal Budget Institution of Science "Central Research Institute of Epidemiology" of The Federal Service on Customers' Rights Protection and Human Well-being Surveillance                                                            | Group of Genomics and Postgenomic Technologies of Central Research Institute of Epidemiology                                                                                                                                                                                                             | Samoilov AE, Kapilevova VV, Dudorova A V., Speranskaya AS, Tivanova EY, Shipulina OY, Akimkin VG                                                                                                                                                                                                                                                                                                                                                                                                                                                                                                      |

|                                                                                                                                                                                                                                |                                                                                                                                                                                                                                |                                                                                                                                                                             |                                                                                                                                                                                                                                                                                                                                                                                                                                                                                                                                                                                               |
|--------------------------------------------------------------------------------------------------------------------------------------------------------------------------------------------------------------------------------|--------------------------------------------------------------------------------------------------------------------------------------------------------------------------------------------------------------------------------|-----------------------------------------------------------------------------------------------------------------------------------------------------------------------------|-----------------------------------------------------------------------------------------------------------------------------------------------------------------------------------------------------------------------------------------------------------------------------------------------------------------------------------------------------------------------------------------------------------------------------------------------------------------------------------------------------------------------------------------------------------------------------------------------|
| EPI_ISL_654020                                                                                                                                                                                                                 | Laboratory of Microbiology, National Reference Lab, Charles Nicolle Hospital, 2-University of Tunis ElManar, Faculty of Medicine of Tunis, LR99ES09, Tunis, Tunisia                                                            | 1-Clinical and Experimental Pharmacology Lab, LR15SP02, National Center of Pharmacovigilance, University of Tunis El Manar, Tunis, Tunisia.                                 | Ilhem Bouhass Ben Boubaker, Sameh Trabelsi, Nissat Ben Alya, Maher Kharrat, Ala Ben Kahla, Jallia Ben Khellil, Salma Abd, Sana Ferjani, Mouna Ben Sassi, Mouna Sefir, Inem Wkeda, Imen Kacem, Gaies Emma, Soumaya Rammeih, Riadh Daghous, Riadh Gaudier.                                                                                                                                                                                                                                                                                                                                      |
| EPI_ISL_654216, EPI_ISL_654234                                                                                                                                                                                                 | Hospital General Universitario Gregorio Marañón                                                                                                                                                                                | SeqCOVID-SPAIN consortium/IBV/CSSIC)                                                                                                                                        | Dario Garcia de Viechoa, Laura Perez-Lago, Maria Herranz, Jon Sicilia, Julia Suarez, Pilar Catalan, Patricia Muñoz and SeqCOVID-SPAIN consortium                                                                                                                                                                                                                                                                                                                                                                                                                                              |
| EPI_ISL_654500                                                                                                                                                                                                                 | The Public Health Agency of Sweden                                                                                                                                                                                             | The Public Health Agency of Sweden                                                                                                                                          | Anna-Malin Linde, Maria Lind Karlberg, Mattias Haukland, Reza Advani, Olov Svanström, Oskar Karlsson Lindjö, Sandra Brodesson, Petra Edquist, Mia                                                                                                                                                                                                                                                                                                                                                                                                                                             |
| EPI_ISL_654504                                                                                                                                                                                                                 | Klinisk mikrobiologi, Västerorrland                                                                                                                                                                                            | The Public Health Agency of Sweden                                                                                                                                          | Anna-Malin Linde, Maria Lind Karlberg, Mattias Haukland, Reza Advani, Olov Svanström, Oskar Karlsson Lindjö, Sandra Brodesson, Petra Edquist, Mia                                                                                                                                                                                                                                                                                                                                                                                                                                             |
| EPI_ISL_654507                                                                                                                                                                                                                 | The Public Health Agency of Sweden                                                                                                                                                                                             | The Public Health Agency of Sweden                                                                                                                                          | Anna-Malin Linde, Maria Lind Karlberg, Mattias Haukland, Reza Advani, Olov Svanström, Oskar Karlsson Lindjö, Sandra Brodesson, Petra Edquist, Mia                                                                                                                                                                                                                                                                                                                                                                                                                                             |
| EPI_ISL_654570, EPI_ISL_654589, EPI_ISL_654614                                                                                                                                                                                 | Servicio de Microbiología, Hospital Universitario Donostia, OSI Donostialdea, Área de Enfermedades Infecciosas, Grupo de Infección Respiratoria y Resistencia Antimicrobiana, Instituto de Investigación Sanitaria Biodonostia | SeqCOVID-SPAIN consortium/IBV/CSSIC)                                                                                                                                        | Gustavo Cilla Eguiluz, Mlagrosa Montes Fos, Luis Pifreño Vázquez, Ane Sorraín, Jose Maria Marroin and SeqCOVID-SPAIN consortium                                                                                                                                                                                                                                                                                                                                                                                                                                                               |
| EPI_ISL_654795, EPI_ISL_654799                                                                                                                                                                                                 | SA Pathology                                                                                                                                                                                                                   | SA Pathology                                                                                                                                                                | Lex Leong, Julien Soubrier, Chuan Kok Lim, Song Gao, Mark Tura, Karin Kassam, Van Bastien, Geoff Higgins                                                                                                                                                                                                                                                                                                                                                                                                                                                                                      |
| EPI_ISL_654810                                                                                                                                                                                                                 | National Public Health Laboratory, National Centre for Infectious Diseases                                                                                                                                                     | National Public Health Laboratory, National Centre for Infectious Diseases                                                                                                  | Tze Minn Mak, Sophie Octavia, Zhenyang Zhou, Lin Cui, Raymond Tze Pin Lin                                                                                                                                                                                                                                                                                                                                                                                                                                                                                                                     |
| EPI_ISL_655950, EPI_ISL_656508, EPI_ISL_656654                                                                                                                                                                                 | Lighthouse Lab in Alderley Park                                                                                                                                                                                                | Welcome Sanger Institute for the COVID-19 Genomics UK (COG-UK) Consortium                                                                                                   | Jacquelyn Wynn, Mairead Hyland, The Lighthouse Lab in Alderley Park and Alex Aberton, Roberto Amato, Sonia Goncalves, Ewan Harrison, David K Jackson, Ian Johnston, Dominic Kwiatkowski, Cordelia Langford, John Sillito on behalf of the Wellcome Sanger Institute COVID-19 Surveillance Team                                                                                                                                                                                                                                                                                                |
| EPI_ISL_658891, EPI_ISL_658901                                                                                                                                                                                                 | Instituto de Diagnóstico y Referencia Epidemiológicos (INDRE)                                                                                                                                                                  | Instituto de Diagnóstico y Referencia Epidemiológicos (INDRE)                                                                                                               | Erasmo Ramirez-Gonzalez, Abril Rodríguez-Maldonado, Claudia Wong-Arambula, Natalydel Cruz-Ortiz, Taliana Nunez-Garcia, Dayanira Avellano-Suarez, Fabiola Garces-Ayala, Lucia Hernandez-Rivas, Irma Lopez-Merthiez, Gisela Barrera-Basilio.                                                                                                                                                                                                                                                                                                                                                    |
| EPI_ISL_660069, EPI_ISL_660070                                                                                                                                                                                                 | Zurita & Zurita Laboratorios                                                                                                                                                                                                   | Zurita & Zurita Laboratorios                                                                                                                                                | Gabriela Sevillaño Camilo Zurita-Salinas Karen Loatza David Ortega-Parades Jeannele Zurita                                                                                                                                                                                                                                                                                                                                                                                                                                                                                                    |
| EPI_ISL_660200                                                                                                                                                                                                                 | NHL-S-MLCH                                                                                                                                                                                                                     | KRISP , KZN Research Innovation and Sequencing Platform                                                                                                                     | Gianthari J, Pillay S, Lessells R, Mdlalose K, York D, Khan S, Tegally H, Wilkinson E, de Oliveira T                                                                                                                                                                                                                                                                                                                                                                                                                                                                                          |
| EPI_ISL_660228                                                                                                                                                                                                                 | KRISP, KZN Research Innovation and Sequencing Platform                                                                                                                                                                         | KRISP, KZN Research Innovation and Sequencing Platform                                                                                                                      | Gianthari J, Pillay S, Lessells R, Mdlalose K, York D, Khan S, Tegally H, Wilkinson E, de Oliveira T                                                                                                                                                                                                                                                                                                                                                                                                                                                                                          |
| EPI_ISL_660305                                                                                                                                                                                                                 | Servicio de Microbiología, Laboratorio Clínico Metropolitano Nord, Hospital Universitari Germans Trias i Pujol, Institut d'Investigació en Ciències de la Salut Germans Trias i Pujol (IGTP)                                   | SeqCOVID-SPAIN consortium/IBV/CSSIC)                                                                                                                                        | Elisa Martí, Antoni E. Bordoy, Anna Not, Adrián Antón, Anabel Fernández, Nona Romani and SeqCOVID-SPAIN consortium                                                                                                                                                                                                                                                                                                                                                                                                                                                                            |
| EPI_ISL_660324                                                                                                                                                                                                                 | General practitioner                                                                                                                                                                                                           | National Reference Center for Viruses of Respiratory Infections, Institut Pasteur, Paris                                                                                    | Marion Barbet, Sylvie Benhili, Méline Bizard, Angela Bisesbarre, Camille Capel, Etienne Simon-Lorère, Vincent Frouf, Maud Vanpeere, Sylvie van der Werf                                                                                                                                                                                                                                                                                                                                                                                                                                       |
| EPI_ISL_660370                                                                                                                                                                                                                 | CHU Clermont-Ferrand                                                                                                                                                                                                           | CNR Virus des Infections Respiratoires - France SUD                                                                                                                         | Antonin Bal, Gregory Destras, Gwendolyne Burin, Hadrien Regue, Quentin Semarac, Marine Valente, Bruno Lira, Christine Archimbaud, Angélie Brebon, Helene Chabrolles, Marine Orbanon, Audrey Mirand, Christel Regagnon, Maxime Bissacq, Patricia Combes, Cécile Henquell, Laurence Jossel                                                                                                                                                                                                                                                                                                      |
| EPI_ISL_660426                                                                                                                                                                                                                 | Orebro klinisk mikrobiologi                                                                                                                                                                                                    | The Public Health Agency of Sweden                                                                                                                                          | Anna-Malin Linde, Maria Lind Karlberg, Mattias Haukland, Reza Advani, Olov Svanström, Oskar Karlsson Lindjö, Sandra Brodesson, Petra Edquist, Mia                                                                                                                                                                                                                                                                                                                                                                                                                                             |
| EPI_ISL_660430                                                                                                                                                                                                                 | Klinisk Mikrobiologi                                                                                                                                                                                                           | The Public Health Agency of Sweden                                                                                                                                          | Anna-Malin Linde, Maria Lind Karlberg, Mattias Haukland, Reza Advani, Olov Svanström, Oskar Karlsson Lindjö, Sandra Brodesson, Petra Edquist, Mia                                                                                                                                                                                                                                                                                                                                                                                                                                             |
| EPI_ISL_660446, EPI_ISL_660447, EPI_ISL_660450, EPI_ISL_660451, EPI_ISL_660454, EPI_ISL_660457, EPI_ISL_660459, EPI_ISL_660464, EPI_ISL_660467, EPI_ISL_660468, EPI_ISL_660471, EPI_ISL_660473, EPI_ISL_660474, EPI_ISL_660489 | see above                                                                                                                                                                                                                      | Abdoul-Salam Quedraogo, Yacouba Sawadogo, Etsia Bealibi, Grit Schubert, Fabian Leandertz, Arsène Zongo, Soumeiya Ouangraoua Zekiba Tarragda, Lassana Sangaré, Halidou Thino |                                                                                                                                                                                                                                                                                                                                                                                                                                                                                                                                                                                               |
| EPI_ISL_660529                                                                                                                                                                                                                 | Institute of Microbiology, Universidad San Francisco de Quito                                                                                                                                                                  | Institute of Microbiology, Universidad San Francisco de Quito                                                                                                               | Sully Márquez, Belén Prado-Vivar, Juan José Guadalupe Monica Becerra-Wong, Bernardo Gutiérrez, Manuel Jaramillo, Verónica Barragán, Patricio Rojas-Silva, Gabriel Trueba, Michelle Grunauer, Pauli Cardenas                                                                                                                                                                                                                                                                                                                                                                                   |
| EPI_ISL_660533                                                                                                                                                                                                                 | Institute of Microbiology, Universidad San Francisco de Quito                                                                                                                                                                  | Institute of Microbiology, Universidad San Francisco de Quito                                                                                                               | Sully Márquez, Belén Prado-Vivar, Juan José Guadalupe Monica Becerra-Wong, Bernardo Gutiérrez, Nabih Dahik, Freddy Iza, Verónica Barragán, Patricio Rojas-Silva, Gabriel Trueba, Michelle Grunauer, Pauli Cardenas                                                                                                                                                                                                                                                                                                                                                                            |
| EPI_ISL_660543, EPI_ISL_660544, EPI_ISL_660545                                                                                                                                                                                 | Laboratory Medicine                                                                                                                                                                                                            | Department of Laboratory Medicine, Lin-Kou Chang Gung Memorial Hospital, Taoyuan, Taiwan                                                                                    | Kuo-Chien Tsao, Yu-Nong Gong, Shu-Li Yang, Yi-Chun Liu, Chung-Guei Huang, Meilan Hsiao, Po-Wai Huang, Cheng-Ta Yang, Cheng-Hsun Chiu, Feng-Nien Huang, Kuo-Ming Lee, Guang-Wu Chen, Shin-Ru Shin                                                                                                                                                                                                                                                                                                                                                                                              |
| EPI_ISL_660581                                                                                                                                                                                                                 | The National Institute of Public Health                                                                                                                                                                                        | State Veterinary Institute, Faojan                                                                                                                                          | Nagy A.Yulincova,HN,NovakovaL,TrnkaD,VveerovaJ                                                                                                                                                                                                                                                                                                                                                                                                                                                                                                                                                |
| EPI_ISL_660632, EPI_ISL_660643                                                                                                                                                                                                 | NHL-S-MLCH                                                                                                                                                                                                                     | KRISP , KZN Research Innovation and Sequencing Platform                                                                                                                     | Gianthari J, Pillay S, Lessells R, Mdlalose K, York D, Khan S, Tegally H, Wilkinson E, de Oliveira T                                                                                                                                                                                                                                                                                                                                                                                                                                                                                          |
| EPI_ISL_661129, EPI_ISL_661173                                                                                                                                                                                                 | Gundersen Molecular Diagnostics Laboratory                                                                                                                                                                                     | Kabarua Cancer Research Institute                                                                                                                                           | Craig S. Richmond, Parate A. Kenny                                                                                                                                                                                                                                                                                                                                                                                                                                                                                                                                                            |
| EPI_ISL_661180, EPI_ISL_661182, EPI_ISL_661184, EPI_ISL_661187, EPI_ISL_661198                                                                                                                                                 | Scientific Veterinary Institute Novi Sad                                                                                                                                                                                       | Veterinary Specialized Institute "Kraljevo", Serbia                                                                                                                         | Vidvanovic D., Tessonvic B., Knezevic A., Jovanovic T., Jankovic M., Sekler M., Banovic Djen B., Petrovic T., Volkening J., Adnoso C.                                                                                                                                                                                                                                                                                                                                                                                                                                                         |
| EPI_ISL_661218, EPI_ISL_661246                                                                                                                                                                                                 | Department of Clinical Microbiology                                                                                                                                                                                            | GIGA Medical Genomics                                                                                                                                                       | Keith Durkin, Maria Atrasi, Sébastien Bonens, Raphaël Boreux, Bouchra Boujemla, Céclie Meek, Perrilette Meim, Marie-Pierre Heyvèle, Vincent Bours                                                                                                                                                                                                                                                                                                                                                                                                                                             |
| EPI_ISL_661258                                                                                                                                                                                                                 | LabPLUS                                                                                                                                                                                                                        | Institute of Environmental Science and Research (ESR)                                                                                                                       | Xiaoyun Ren, Matt Storey, Nikki Freed, Muhammad Faisal, Jing Wang, Hernes Perez, Anja Werno, Anlie van der Linden, Ario Upton, Chris Mansell, David Hammer, Dragana Dinkovic, Gary McAuliffe, Hana Sofia Andersson, James Usher, Jill Sherman, Josh Freeman, Julia Howard, Juliet Ely, Mary DeAlmeida, Matt Blakeson, Matthew Rogers, Max Bloomfield, Michael Addide, Michelle Bains, Sally Roberts, Sarah-Jelena, Sharmin Mulatyan, Susan Morpeth, Susan Taylor, Timothy Blackmore, Vani Sathyaendran, Veronica Payne, Virginia Hope, Erasmus Smit, Lauren Jolly, Jim Slander, Joep de Light |
| EPI_ISL_661265                                                                                                                                                                                                                 | Middlemore Hospital                                                                                                                                                                                                            | Institute of Environmental Science and Research (ESR)                                                                                                                       | Xiaoyun Ren, Matt Storey, Nikki Freed, Muhammad Faisal, Jing Wang, Hernes Perez, Anja Werno, Anlie van der Linden, Ario Upton, Chris Mansell, David Hammer, Dragana Dinkovic, Gary McAuliffe, Hana Sofia Andersson, James Usher, Jill Sherman, Josh Freeman, Julia Howard, Juliet Ely, Mary DeAlmeida, Matt Blakeson, Matthew Rogers, Max Bloomfield, Michael Addide, Michelle Bains, Sally Roberts, Sarah-Jelena, Sharmin Mulatyan, Susan Morpeth, Susan Taylor, Timothy Blackmore, Vani Sathyaendran, Veronica Payne, Virginia Hope, Erasmus Smit, Lauren Jolly, Jim Slander, Joep de Light |
| EPI_ISL_661276                                                                                                                                                                                                                 | Klinisk mikrobiologi                                                                                                                                                                                                           | The Public Health Agency of Sweden                                                                                                                                          | Department of Microbiology, The Public Health Agency of Sweden                                                                                                                                                                                                                                                                                                                                                                                                                                                                                                                                |
| EPI_ISL_661287                                                                                                                                                                                                                 | Garve klinisk mikrobiologi                                                                                                                                                                                                     | The Public Health Agency of Sweden                                                                                                                                          | Department of Microbiology, The Public Health Agency of Sweden                                                                                                                                                                                                                                                                                                                                                                                                                                                                                                                                |
| EPI_ISL_661291                                                                                                                                                                                                                 | Mikrobiologen                                                                                                                                                                                                                  | The Public Health Agency of Sweden                                                                                                                                          | Department of Microbiology, The Public Health Agency of Sweden                                                                                                                                                                                                                                                                                                                                                                                                                                                                                                                                |

EPI\_ISL\_661300  
EPI\_ISL\_661304

Laboratoriemedicin, Klinisk mikrobiologi  
CSIR-Indian Institute of Chemical Biology, MEDICA  
Superspecialty Hospital Kolkata

The Public Health Agency of Sweden  
CSIR-Indian Institute of Chemical Biology, MEDICA  
Superspecialty Hospital Kolkata

Department of Microbiology, The Public Health Agency of Sweden  
Sujay Krishna Maity, Priyanka Mallik,  
Dabaleena Bhawanik, Abhinavke Lahiri, Dr. Avraj Roy, Dr. Soumen Saha, Dr. Arpita Ghosh Mitra, Dr. Rajesh  
Pandey, Dr. Sanjib Paul, Dr. Partha Chakrabarti, Dr. Saikat Chakrabarti

We gratefully acknowledge the following Authors from the Originating laboratories responsible for obtaining the specimens, as well as the Submitting laboratories where the genome data were generated and shared via GISAIID, on which this research is based.

All Submitters of data may be contacted directly via [www.gisaid.org](http://www.gisaid.org)

| <b>Accession ID</b>            | <b>Originating Laboratory</b>                         | <b>Submitting Laboratory</b>                                               | <b>Authors</b>                                                                                                                                                                                                                                                                                                                                                                                      |
|--------------------------------|-------------------------------------------------------|----------------------------------------------------------------------------|-----------------------------------------------------------------------------------------------------------------------------------------------------------------------------------------------------------------------------------------------------------------------------------------------------------------------------------------------------------------------------------------------------|
| EPI_ISL_688335                 | Lighthouse Lab in Glasgow                             | Wellcome Sanger Institute for the COVID-19 Genomics UK (COG-UK) Consortium | Harper VanSteenhouse, Yumi Kasai, David Gray, Carol Clouston, Anna Dominiczak and Alex Alderton, Roberto Amato, Sonia Goncalves, Ewan Harrison, David K. Jackson, Ian Johnston, Dominic Kwiatkowski, Cordelia Langford, John Sillitoe on behalf of the Wellcome Sanger Institute COVID-19 Surveillance Team ( <a href="http://www.sanger.ac.uk/covid-team">http://www.sanger.ac.uk/covid-team</a> ) |
| EPI_ISL_677211, EPI_ISL_677212 | Virginia Division of Consolidated Laboratory Services | Virginia Division of Consolidated Laboratory Services                      | Virginia DCLS                                                                                                                                                                                                                                                                                                                                                                                       |
| EPI_ISL_683969                 | DOHMH Morristania                                     | New York City Public Health Laboratory                                     | Jade Wang, et al.                                                                                                                                                                                                                                                                                                                                                                                   |

We gratefully acknowledge the following Authors from the Originating laboratories responsible for obtaining the specimens, as well as the Submitting laboratories where the genome data were generated and shared via GISAID, on which this research is based.

All Submitters of data may be contacted directly via [www.gisaid.org](http://www.gisaid.org)

Authors are sorted alphabetically.

| Accession ID                                   | Originating Laboratory                                                                                         | Submitting Laboratory                                                                                                              | Authors                                                                                                                                                                                                                                                                                                                                                                                                                                       |
|------------------------------------------------|----------------------------------------------------------------------------------------------------------------|------------------------------------------------------------------------------------------------------------------------------------|-----------------------------------------------------------------------------------------------------------------------------------------------------------------------------------------------------------------------------------------------------------------------------------------------------------------------------------------------------------------------------------------------------------------------------------------------|
| EP1_USL_416038                                 | National Influenza Center - Instituto Adolfo Lutz                                                              | Instituto Adolfo Lutz, Interdisciplinary Procedures Center, Strategic Laboratory                                                   | Claudio Tavares Sacchi, Claudia Regina Gonçalves, Carlos Henrique Camargo, Erica Valessa Ramos Gomes, Fabiana Cristina Pereira dos Santos, Daniela Bernardes Borges da Silva, Simone Guadagnucci Morioli, Adriano Abdu, Adriana Bugno, Maria do Carmo Stampato Tavares Timaretzky, Terezinha Maria de Paiva                                                                                                                                   |
| EP1_USL_427292                                 | LACEN-AL - Laboratório Central de Alagoas                                                                      | Instituto Oswaldo Cruz FIOCRUZ - Laboratory of Respiratory Viruses and Measles (LRS)                                               | Paola Resende, Fernando Matta, Luciana Appolinario, Sunardo Roy, Alinne Mattos, Milene Miranda, Cristiana Garcia, Bráulio Caetano, Maria Ogzrzwaiska, Priscila Born, Jonathan Lopes, Marilda Siqueira                                                                                                                                                                                                                                         |
| EP1_USL_431240, EP1_USL_456088                 | Fujian Center for Disease Control and Prevention<br>LACEN RJ - Laboratório Central de Saúde Pública Noel Nunes | Fujian Center for Disease Control and Prevention<br>Laboratory of Respiratory Viruses and Measles, Oswaldo Cruz Institute, FIOCRUZ | Paola Resende, Luciana Appolinario, Fernando Matta, Alinne Mattos, Milene Miranda, Cristiana Garcia, Bráulio Caetano, Maria Ogzrzwaiska, Jonathan Lin Qi, Huang Zhimiao, Zhang Yanhua, Wang Yuwei                                                                                                                                                                                                                                             |
| EP1_USL_461606, EP1_USL_461678                 | West of Scotland Specialist Virology Centre, NHSGGC / MRC-University of Glasgow Centre for Virus Research      | COVID-19 Genomics UK (COG-UK) Consortium                                                                                           | Ana da Silva Filipe, Natasta Johnson, Kathy Smollett, Daniel Mair, Stephen Cammichiaeli, Lily Tong, Jemma Nichols, Elini Aranday-Cortes, Kirstyn Brunker, Yasmin Parr, Kyriaki Nomiku, Sarah McDonnell, Patavee Assampanit, Richard Orton, Joseph Hughes, Steenu Vattipally, David L. Robertson, Alastair MacLellan, Rory Gunnson, Kathy Li, Natasha Jesudason, Rajiv Shah, James Shepherd, Amelia Ho, Emma Thomson                           |
| EP1_USL_467359, EP1_USL_467366                 | Laboratory of Respiratory Viruses and Measles, Oswaldo Cruz Institute, FIOCRUZ                                 | Laboratory of Respiratory Viruses and Measles, Oswaldo Cruz Institute, FIOCRUZ                                                     | Paola Resende, Luciana Appolinario, Fernando Matta, Ana Carolina Mendonça, Alinne Mattos, Milene Miranda, Cristiana Garcia, Bráulio Caetano, Maria Ogzrzwaiska, Jonathan Lopes, Marilda Siqueira                                                                                                                                                                                                                                              |
| EP1_USL_468305                                 | Centro de Vigilância a Saúde de Diadema                                                                        | Instituto Adolfo Lutz, Interdisciplinary Procedures Center, Strategic Laboratory                                                   | Claudio Tavares Sacchi, Claudia Regina Gonçalves, Erica Valessa Ramos Gomes                                                                                                                                                                                                                                                                                                                                                                   |
| EP1_USL_468311, EP1_USL_468312                 | Hospital Municipal Dr. Ignácio Proença de Gouveia                                                              | Instituto Adolfo Lutz, Interdisciplinary Procedures Center, Strategic Laboratory                                                   | Claudio Tavares Sacchi, Claudia Regina Gonçalves, Erica Valessa Ramos Gomes                                                                                                                                                                                                                                                                                                                                                                   |
| EP1_USL_468313                                 | Vigilância Epidemiológica de São Bernardo do Campo                                                             | Instituto Adolfo Lutz, Interdisciplinary Procedures Center, Strategic Laboratory                                                   | Claudio Tavares Sacchi, Claudia Regina Gonçalves, Erica Valessa Ramos Gomes                                                                                                                                                                                                                                                                                                                                                                   |
| EP1_USL_468314                                 | CITA Centro de Testagem e Aconselhamento                                                                       | Instituto Adolfo Lutz, Interdisciplinary Procedures Center, Strategic Laboratory                                                   | Claudio Tavares Sacchi, Claudia Regina Gonçalves, Erica Valessa Ramos Gomes                                                                                                                                                                                                                                                                                                                                                                   |
| EP1_USL_468316                                 | UPA Vila Assis                                                                                                 | Instituto Adolfo Lutz, Interdisciplinary Procedures Center, Strategic Laboratory                                                   | Claudio Tavares Sacchi, Claudia Regina Gonçalves, Erica Valessa Ramos Gomes                                                                                                                                                                                                                                                                                                                                                                   |
| EP1_USL_468321                                 | Hospital Universitario da USP                                                                                  | Instituto Adolfo Lutz, Interdisciplinary Procedures Center, Strategic Laboratory                                                   | Claudio Tavares Sacchi, Claudia Regina Gonçalves, Erica Valessa Ramos Gomes                                                                                                                                                                                                                                                                                                                                                                   |
| EP1_USL_471541                                 | Hospital Geral Santa Marcelina                                                                                 | Instituto Adolfo Lutz, Interdisciplinary Procedures Center, Strategic Laboratory                                                   | Claudio Tavares Sacchi, Claudia Regina Gonçalves, Erica Valessa Ramos Gomes                                                                                                                                                                                                                                                                                                                                                                   |
| EP1_USL_471542                                 | Secretaria de Saude de Mogi das Cruzes                                                                         | Instituto Adolfo Lutz, Interdisciplinary Procedures Center, Strategic Laboratory                                                   | Claudio Tavares Sacchi, Claudia Regina Gonçalves, Erica Valessa Ramos Gomes                                                                                                                                                                                                                                                                                                                                                                   |
| EP1_USL_471545                                 | Hospital Sao Paulo de Ensino da Unifesp                                                                        | Instituto Adolfo Lutz, Interdisciplinary Procedures Center, Strategic Laboratory                                                   | Claudio Tavares Sacchi, Claudia Regina Gonçalves, Erica Valessa Ramos Gomes                                                                                                                                                                                                                                                                                                                                                                   |
| EP1_USL_471546                                 | AMA DR Jose Soares Hungria                                                                                     | Instituto Adolfo Lutz, Interdisciplinary Procedures Center, Strategic Laboratory                                                   | Claudio Tavares Sacchi, Claudia Regina Gonçalves, Erica Valessa Ramos Gomes                                                                                                                                                                                                                                                                                                                                                                   |
| EP1_USL_471549                                 | Hospital Municipal Carmen Prudente                                                                             | Instituto Adolfo Lutz, Interdisciplinary Procedures Center, Strategic Laboratory                                                   | Claudio Tavares Sacchi, Claudia Regina Gonçalves, Erica Valessa Ramos Gomes                                                                                                                                                                                                                                                                                                                                                                   |
| EP1_USL_471552                                 | Hospital Sancia Maggiore                                                                                       | Instituto Adolfo Lutz, Interdisciplinary Procedures Center, Strategic Laboratory                                                   | Claudio Tavares Sacchi, Claudia Regina Gonçalves, Erica Valessa Ramos Gomes                                                                                                                                                                                                                                                                                                                                                                   |
| EP1_USL_471556                                 | Pronto Socorro Jose Ibrahim                                                                                    | Instituto Adolfo Lutz, Interdisciplinary Procedures Center, Strategic Laboratory                                                   | Claudio Tavares Sacchi, Claudia Regina Gonçalves, Erica Valessa Ramos Gomes                                                                                                                                                                                                                                                                                                                                                                   |
| EP1_USL_471562, EP1_USL_471582                 | Hosp. Municipal Prof. Dr. Alípio Corrêa Neto                                                                   | Instituto Adolfo Lutz, Interdisciplinary Procedures Center, Strategic Laboratory                                                   | Claudio Tavares Sacchi, Claudia Regina Gonçalves, Erica Valessa Ramos Gomes                                                                                                                                                                                                                                                                                                                                                                   |
| EP1_USL_471647                                 | Hospital Municipal de Baurerl Dr. Francisco Moran                                                              | Instituto Adolfo Lutz, Interdisciplinary Procedures Center, Strategic Laboratory                                                   | Claudio Tavares Sacchi, Claudia Regina Gonçalves, Erica Valessa Ramos Gomes                                                                                                                                                                                                                                                                                                                                                                   |
| EP1_USL_471648                                 | UBS e Pronto Socorro Id. Jacira                                                                                | Instituto Adolfo Lutz, Interdisciplinary Procedures Center, Strategic Laboratory                                                   | Claudio Tavares Sacchi, Claudia Regina Gonçalves, Erica Valessa Ramos Gomes                                                                                                                                                                                                                                                                                                                                                                   |
| EP1_USL_473651                                 | West of Scotland Specialist Virology Centre, NHSGGC / MRC-University of Glasgow Centre for Virus Research      | COVID-19 Genomics UK (COG-UK) Consortium                                                                                           | Ana da Silva Filipe, Natasta Johnson, Kathy Smollett, Daniel Mair, Stephen Cammichiaeli, Lily Tong, Jemma Nichols, Elini Aranday-Cortes, Kirstyn Brunker, Yasmin Parr, Alice Broos, Kyriaki Nomiku, Sarah McDonnell, Marc Nebel, Patavee Assampanit, Richard Orton, Joseph Hughes, Steenu Vattipally, David L. Robertson, Alastair MacLellan, Rory Gunnson, Kathy Li, Natasha Jesudason, Rajiv Shah, James Shepherd, Antonia Ho, Emma Thomson |
| EP1_USL_476282                                 | DBI Diagnósticos do Brasil                                                                                     | Instituto de Medicina Tropical da Universidade de São Paulo                                                                        | Samples: Nelson Gaburu Jr, Sequenciando: Ingra Moraes Claro, Jaqueline Goes de Jesus, Erica Regina Manuil, Flavia Cristina da Silva Sales, Thais de Moura Coletti, Camilla Alves Maia da Silva, Mariana Severo Ramundo, Giulia Magalhães Ferreira, Darlan da Silva Cardoso, Julien Theze, Nuno Faria, Ester Sabino                                                                                                                            |
| EP1_USL_476341                                 | Laboratório de Patologia Clínica - UNICAMP                                                                     | Laboratório de Estudos de Virus Emergentes - UNICAMP                                                                               | José Luiz Proença-Modena, Magnun Nuelto Nunes dos Santos, Angelica Schreiber, Julia Forato, Camilla Simeoni, Marcilio Jorge Fumagalli, Marlene Ribeiro Amorim, Darlan da Silva Cardoso, Nuno Rodrigues Faria, Julien Theze, Lutz Gonzaga, Jaqueline Goes Jesus e William Marcel de Souza                                                                                                                                                      |
| EP1_USL_476373                                 | Hospital da Clinicas da Faculdade de Medicina da Universidade de São Paulo                                     | Instituto de Medicina Tropical da Universidade de São Paulo                                                                        | Samples: Ingra Moraes Claro, Erica Regina Manuil, Cecília Sletete Alencar, Carolina S. Lazzar, Silvia F. Costa, Sequenciando: Ingra Moraes Claro, Jaqueline Goes de Jesus, Erica Regina Manuil, Flavia Cristina da Silva Sales, Thais de Moura Coletti, Camilla Alves Maia da Silva, Mariana Severo Ramundo, Giulia Magalhães Ferreira, Darlan da Silva Cardoso, Julien Theze, Nuno Faria, Ester Sabino                                       |
| EP1_USL_476395, EP1_USL_476398                 | Laboratório de Patologia Clínica - UNICAMP                                                                     | Laboratório de Estudos de Virus Emergentes - UNICAMP                                                                               | José Luiz Proença-Modena, Magnun Nuelto Nunes dos Santos, Angelica Schreiber, Julia Forato, Camilla Simeoni, Marcilio Jorge Fumagalli, Marlene Ribeiro Amorim, Darlan da Silva Cardoso, Nuno Rodrigues Faria, Julien Theze, Lutz Gonzaga, Jaqueline Goes Jesus e William Marcel de Souza                                                                                                                                                      |
| EP1_USL_476446, EP1_USL_476446, EP1_USL_476469 | Hospital da Clinicas da Faculdade de Medicina da Universidade de São Paulo                                     | Instituto de Medicina Tropical da Universidade de São Paulo                                                                        | Samples: Ingra Moraes Claro, Erica Regina Manuil, Cecília Sletete Alencar, Carolina S. Lazzar, Silvia F. Costa, Sequenciando: Ingra Moraes Claro, Jaqueline Goes de Jesus, Erica Regina Manuil, Flavia Cristina da Silva Sales, Thais de Moura Coletti, Camilla Alves Maia da Silva, Mariana Severo Ramundo, Giulia Magalhães Ferreira, Darlan da Silva Cardoso, Julien Theze, Nuno Faria, Ester Sabino                                       |



|                                                                                |                                                                                                                                                                                                                     |                                                                                                                                                       |                                                                                                                                                                                                                                                                                                                                                                                                                                                                                                                                                                                                                                                                                                                                                                                                                                                                   |
|--------------------------------------------------------------------------------|---------------------------------------------------------------------------------------------------------------------------------------------------------------------------------------------------------------------|-------------------------------------------------------------------------------------------------------------------------------------------------------|-------------------------------------------------------------------------------------------------------------------------------------------------------------------------------------------------------------------------------------------------------------------------------------------------------------------------------------------------------------------------------------------------------------------------------------------------------------------------------------------------------------------------------------------------------------------------------------------------------------------------------------------------------------------------------------------------------------------------------------------------------------------------------------------------------------------------------------------------------------------|
| EP1_ISL_478094                                                                 | West of Scotland Specialist Virology Centre, NHS/GG / MRC-University of Glasgow Centre for Virus Research                                                                                                           | COVID-19 Genomics UK (COG-UK) Consortium                                                                                                              | Ana da Silva Filipe, Nataasha Johnson, Kathy Smollett, Daniel Maar, Stephen Carmichael, Lily Tong, Janna Nichols, Elinu Aranday-Cortes, Kirslyn Brunker, Yasmin Parr, Alice Brooks, Kyraki Nomioku, Sarah McDonnell, Marc Nebel, Patavwe Asamaphan, Richard Oton, Joseph Hughes, Steenu Vaitipally, David L Robertson, Alastair MacLellan, Roy Gunnson, Kathy Li, Nataasha Jesudason, Rajiv Shah, James Shepherd, Antonia Ho, Emma Thomson                                                                                                                                                                                                                                                                                                                                                                                                                        |
| EP1_ISL_478249                                                                 | Virology Department, Royal Infirmary of Edinburgh, NHS Lothian / School of Biological Sciences, University of Edinburgh / Institute of Genetics and Molecular Medicine, University of Edinburgh                     | COVID-19 Genomics UK (COG-UK) Consortium                                                                                                              | McHugh M, Dewar R, Rooke S, Gallagher M, Balczaz C, O'Toole A, Scher E, Hill V, McCrone JT, Colquhoun R, Yu X, Jackson B, Rambaut A, Williams TC, Templeton K                                                                                                                                                                                                                                                                                                                                                                                                                                                                                                                                                                                                                                                                                                     |
| EP1_ISL_484313                                                                 | Northumbria University / South Tees Hospitals NHS Foundation Trust / North Cumbria Integrated Care NHS Foundation Trust / North Tees and Hartlepool NHS Foundation Trust / Newcastle Hospitals NHS Foundation Trust | COVID-19 Genomics UK (COG-UK) Consortium                                                                                                              | Darren L Smith, Andrew Nelson, Matthew Bashton, Greg R Young, Joshua Loh, John Allan, Mohammad A Tariq, Giles S Holt, Gary Black, Wen C Yew, Lynn Dover, Paul Baker, Steve Liggett, Sarah Essex, Jane Greenaway, Debra Padgett, Clive Graham, Garren Scott, Edward Barton, Emma Swindells, Brendan Payne, Jennifer Collins, Yusef Taha, Gary Ellingham                                                                                                                                                                                                                                                                                                                                                                                                                                                                                                            |
| EP1_ISL_486429                                                                 | Unknown                                                                                                                                                                                                             | Clinical Laboratory, Hospital Israelita Albert Einstein                                                                                               | Maita F., Amgarten D., Guedes R.L., Santana R.A., de Menezes F.G., Mangueira C.L. and Pinho J.R.                                                                                                                                                                                                                                                                                                                                                                                                                                                                                                                                                                                                                                                                                                                                                                  |
| EP1_ISL_48653                                                                  | NI-OMICS DNA Sequencing research facility, Northumbria University                                                                                                                                                   | Wellcome Sanger Institute for the COVID-19 Genomics UK (COG-UK) consortium                                                                            | Chris Durcan, Sheila Waugh, Shirleia Burton-Fanning, Gary Ellingham, Jennifer Collins, Brendan Payne, Yusef Taha, Emma Swindells, Jane Greenaway, Edward Barton, Garren Scott, Debra Padgett, Clive Graham, Sarah Essex, Steve Liggett, Paul Baker, Lynn Dover, Wen Yew, Gary Black, John Allan, Joshua Loh, Greg Young, Matthew Bashton, Andrew Nelson, Daniel Smith and Alex Alderton, Roberto Araujo, Sonia Gonçalves, Euan Harrison, David K. Jackson, Ian Johnson, Dominic Kwiatkowski, Cordelia Langdon, John Silvine on behalf of the Wellcome Sanger Institute COVID-19 Surveillance Team ( <a href="http://www.sanger.ac.uk/covid-team">http://www.sanger.ac.uk/covid-team</a> )                                                                                                                                                                         |
| EP1_ISL_490028                                                                 | South Eastern Area Laboratory Services (SEALS)                                                                                                                                                                      | NSW Health Pathology - Institute of Clinical Pathology and Medical Research, Westmead Hospital, University of Sydney                                  | CIDM-PH et al.                                                                                                                                                                                                                                                                                                                                                                                                                                                                                                                                                                                                                                                                                                                                                                                                                                                    |
| EP1_ISL_490482                                                                 | Northumbria University / South Tees Hospitals NHS Foundation Trust / North Cumbria Integrated Care NHS Foundation Trust / North Tees and Hartlepool NHS Foundation Trust / Newcastle Hospitals NHS Foundation Trust | COVID-19 Genomics UK (COG-UK) Consortium                                                                                                              | Darren L Smith, Andrew Nelson, Matthew Bashton, Greg R Young, Joshua Loh, John Allan, Mohammad A Tariq, Giles S Holt, Gary Black, Wen C Yew, Lynn Dover, Paul Baker, Steve Liggett, Sarah Essex, Jane Greenaway, Debra Padgett, Clive Graham, Garren Scott, Edward Barton, Emma Swindells, Brendan Payne, Jennifer Collins, Yusef Taha, Gary Ellingham                                                                                                                                                                                                                                                                                                                                                                                                                                                                                                            |
| EP1_ISL_492036                                                                 | Instituto de Biologia do Exército                                                                                                                                                                                   | Laboratório Metabolismo Macromolecular Frimino Torres de Castro, Instituto de Biociências Carlos Chagas Filho, Universidade Federal do Rio de Janeiro | Bianca Catarina Azevedo Cabral, Aline Rosa Vianna de Souza, Marcos Domênis-Ribeiro, Tatiana LS Nogueira, Nádia Vaz Gonçalves da Cruz, Caleb Silva                                                                                                                                                                                                                                                                                                                                                                                                                                                                                                                                                                                                                                                                                                                 |
| EP1_ISL_493681, EP1_ISL_493688                                                 | West of Scotland Specialist Virology Centre, NHS/GG / MRC-University of Glasgow Centre for Virus Research                                                                                                           | COVID-19 Genomics UK (COG-UK) Consortium                                                                                                              | Ana da Silva Filipe, Nataasha Johnson, Kathy Smollett, Daniel Maar, Stephen Carmichael, Lily Tong, Janna Nichols, Elinu Aranday-Cortes, Kirslyn Brunker, Yasmin Parr, Alice Brooks, Kyraki Nomioku, Sarah McDonnell, Marc Nebel, Patavwe Asamaphan, Richard Oton, Joseph Hughes, Steenu Vaitipally, David L Robertson, Alastair MacLellan, Roy Gunnson, Kathy Li, Nataasha Jesudason, Rajiv Shah, James Shepherd, Antonia Ho, Emma Thomson                                                                                                                                                                                                                                                                                                                                                                                                                        |
| EP1_ISL_500483                                                                 | LACEN/PE                                                                                                                                                                                                            | Wallaalab, Aggeu Magalhães Institute                                                                                                                  | Marcelo Henrique Santos Paiva, Duschinka Ribeiro Duarte Guedes, Cassia Docena, Mathheus Filgueira Bezerra, Felipe Zimmer-Drozdi, Lais Ceschini Machado, Larissa Krotkovsky, Elisama Hevelino, Alexandra Freitas da Silva, Ludson Richardson Silva, Vascorcelis Antonio Marinho Bezerra, Severino Jefferson Ribeiro da Silva, Kamilla Gaudêncio de Silva Sales, Bruna Soares Lima Figueiredo de Sá, Derlillano Lopes da Cruz, Claudio Eduardo Cavalcanti, Armando de Menezes Neto, Carolina Targino Alves da Silva, Renata Pessoa Germano Mendes, Maria Apareice Lopes da Silva, Tiago Góti, Paoli Cristina Resende, Gonzalo Ballo, Michielle da Silva Barros, Wlabevitor Ricardo Correia do Nascimento, Rodrigo Moraes Louvo Accorreda, Luciane Caroline Albuquerque Bezerra, Sivanai Fritto Barreto Filho, Constância Fátima Junqueira Ayres, Gabriel Luz Waltun |
| EP1_ISL_502875                                                                 | LACEN/PE                                                                                                                                                                                                            | LABBE, Federal University of Pernambuco                                                                                                               | WILSON JOSÉ DA SILVA JUNIOR, HENRI LACENDA ALVES DA CRUZ, MARCOS DA SILVA REQUEIRA NETO, BRUNO SAMPAIO, SERGIO DE SA LEITAO PAIVA JUNIOR, ZILDENÉ DE SOUSA SILVEIRA, MARA GALDINO DA ROCHA PINTA, MICHELLE CRISTINY PEREIRA, REGINALDO GONCALVES DE LIMA NETO, MARCOS ANTONIO DE MORAIS JUNIOR, ANTONIO CARLOS DE FREITAS, VALDIR DE QUEIROZ BALBINO.                                                                                                                                                                                                                                                                                                                                                                                                                                                                                                             |
| EP1_ISL_508266                                                                 | Government Medical College                                                                                                                                                                                          | National Institute of Biomedical Genomics                                                                                                             | Airindam Meitra, Jyoti Travanse, Dharaal Khatri, Matik Dave, Saumitra Das                                                                                                                                                                                                                                                                                                                                                                                                                                                                                                                                                                                                                                                                                                                                                                                         |
| EP1_ISL_511103                                                                 | Instituto Nacional de Saúde (INSA)                                                                                                                                                                                  | Instituto Nacional de Saúde (INSA)                                                                                                                    | Borges et al                                                                                                                                                                                                                                                                                                                                                                                                                                                                                                                                                                                                                                                                                                                                                                                                                                                      |
| EP1_ISL_513614, EP1_ISL_513632, EP1_ISL_513646, EP1_ISL_513678, EP1_ISL_515520 | Programa de Oncovirologia, Instituto Nacional de Câncer                                                                                                                                                             | Programa de Oncovirologia, Instituto Nacional de Câncer                                                                                               | Juliana D. Siqueira, Livia R. Goss, Bruna M. Alves, Claudia Ciccia, James Athos, João P. B. Viola, Andreia C. de Melo, Marcelo A. Soares                                                                                                                                                                                                                                                                                                                                                                                                                                                                                                                                                                                                                                                                                                                          |
| EP1_ISL_515524                                                                 | Hospital Municipal do Taluapa Carmo Caricchio                                                                                                                                                                       | Instituto Adolfo Lutz, Interdisciplinary Procedures Center, Strategic Laboratory                                                                      | Claudio Travares Sacchi, Claudia Regina Gonçalves, Erica Valessa Ramos Gomes                                                                                                                                                                                                                                                                                                                                                                                                                                                                                                                                                                                                                                                                                                                                                                                      |
| EP1_ISL_515526                                                                 | PS Municipal Dr Lauro Ribas Braga                                                                                                                                                                                   | Instituto Adolfo Lutz, Interdisciplinary Procedures Center, Strategic Laboratory                                                                      | Claudio Travares Sacchi, Claudia Regina Gonçalves, Erica Valessa Ramos Gomes                                                                                                                                                                                                                                                                                                                                                                                                                                                                                                                                                                                                                                                                                                                                                                                      |
| EP1_ISL_515529                                                                 | Hospital Municipal do Taluapa Carmo Caricchio                                                                                                                                                                       | Instituto Adolfo Lutz, Interdisciplinary Procedures Center, Strategic Laboratory                                                                      | Claudio Travares Sacchi, Claudia Regina Gonçalves, Erica Valessa Ramos Gomes                                                                                                                                                                                                                                                                                                                                                                                                                                                                                                                                                                                                                                                                                                                                                                                      |
| EP1_ISL_515541                                                                 | Ponto Socorro Municipal Julio Tupy                                                                                                                                                                                  | Instituto Adolfo Lutz, Interdisciplinary Procedures Center, Strategic Laboratory                                                                      | Claudio Travares Sacchi, Claudia Regina Gonçalves, Erica Valessa Ramos Gomes                                                                                                                                                                                                                                                                                                                                                                                                                                                                                                                                                                                                                                                                                                                                                                                      |
| EP1_ISL_515544                                                                 | Hospital Montemagno                                                                                                                                                                                                 | Instituto Adolfo Lutz, Interdisciplinary Procedures Center, Strategic Laboratory                                                                      | Claudio Travares Sacchi, Claudia Regina Gonçalves, Erica Valessa Ramos Gomes                                                                                                                                                                                                                                                                                                                                                                                                                                                                                                                                                                                                                                                                                                                                                                                      |
| EP1_ISL_515547                                                                 | Ama Dr Jose Soares Hungria                                                                                                                                                                                          | Instituto Adolfo Lutz, Interdisciplinary Procedures Center, Strategic Laboratory                                                                      | Claudio Travares Sacchi, Claudia Regina Gonçalves, Erica Valessa Ramos Gomes                                                                                                                                                                                                                                                                                                                                                                                                                                                                                                                                                                                                                                                                                                                                                                                      |
| EP1_ISL_515548                                                                 | Centro Medico da Policia Militar do Estado de Sao Paulo                                                                                                                                                             | Instituto Adolfo Lutz, Interdisciplinary Procedures Center, Strategic Laboratory                                                                      | Claudio Travares Sacchi, Claudia Regina Gonçalves, Erica Valessa Ramos Gomes                                                                                                                                                                                                                                                                                                                                                                                                                                                                                                                                                                                                                                                                                                                                                                                      |
| EP1_ISL_515552                                                                 | Hospital Municipal Dr. Jose Soares Hungria                                                                                                                                                                          | Instituto Adolfo Lutz, Interdisciplinary Procedures Center, Strategic Laboratory                                                                      | Claudio Travares Sacchi, Claudia Regina Gonçalves, Erica Valessa Ramos Gomes                                                                                                                                                                                                                                                                                                                                                                                                                                                                                                                                                                                                                                                                                                                                                                                      |
| EP1_ISL_515553                                                                 | Hospital Municipal do Taluapa Carmo Caricchio                                                                                                                                                                       | Instituto Adolfo Lutz, Interdisciplinary Procedures Center, Strategic Laboratory                                                                      | Claudio Travares Sacchi, Claudia Regina Gonçalves, Erica Valessa Ramos Gomes                                                                                                                                                                                                                                                                                                                                                                                                                                                                                                                                                                                                                                                                                                                                                                                      |
| EP1_ISL_515554                                                                 | Hospital Municipal Dr. Ignacio Poesira de Gouvea                                                                                                                                                                    | Instituto Adolfo Lutz, Interdisciplinary Procedures Center, Strategic Laboratory                                                                      | Claudio Travares Sacchi, Claudia Regina Gonçalves, Erica Valessa Ramos Gomes                                                                                                                                                                                                                                                                                                                                                                                                                                                                                                                                                                                                                                                                                                                                                                                      |
| EP1_ISL_515555                                                                 | Promo Socorro Municipal de Ferrus                                                                                                                                                                                   | Instituto Adolfo Lutz, Interdisciplinary Procedures Center, Strategic Laboratory                                                                      | Claudio Travares Sacchi, Claudia Regina Gonçalves, Erica Valessa Ramos Gomes                                                                                                                                                                                                                                                                                                                                                                                                                                                                                                                                                                                                                                                                                                                                                                                      |
| EP1_ISL_515555                                                                 | Hospital Geral de Vila Nova Cachoeirinha                                                                                                                                                                            | Instituto Adolfo Lutz, Interdisciplinary Procedures Center, Strategic Laboratory                                                                      | Claudio Travares Sacchi, Claudia Regina Gonçalves, Erica Valessa Ramos Gomes                                                                                                                                                                                                                                                                                                                                                                                                                                                                                                                                                                                                                                                                                                                                                                                      |
| EP1_ISL_515559                                                                 | Hospital Sao Paulo de Ensino da Unlisp                                                                                                                                                                              | Instituto Adolfo Lutz, Interdisciplinary Procedures Center, Strategic Laboratory                                                                      | Claudio Travares Sacchi, Claudia Regina Gonçalves, Erica Valessa Ramos Gomes                                                                                                                                                                                                                                                                                                                                                                                                                                                                                                                                                                                                                                                                                                                                                                                      |
| EP1_ISL_515561                                                                 | Hospital Montemagno                                                                                                                                                                                                 | Instituto Adolfo Lutz, Interdisciplinary Procedures Center, Strategic Laboratory                                                                      | Claudio Travares Sacchi, Claudia Regina Gonçalves, Erica Valessa Ramos Gomes                                                                                                                                                                                                                                                                                                                                                                                                                                                                                                                                                                                                                                                                                                                                                                                      |
| EP1_ISL_515582                                                                 | Hospital Municipal Doutor Alexandre Zaic                                                                                                                                                                            | Instituto Adolfo Lutz, Interdisciplinary Procedures Center, Strategic Laboratory                                                                      | Claudio Travares Sacchi, Claudia Regina Gonçalves, Erica Valessa Ramos Gomes                                                                                                                                                                                                                                                                                                                                                                                                                                                                                                                                                                                                                                                                                                                                                                                      |

|                                |                                                                                                         |                                                                                                         |                                                                                                                     |                                                                             |
|--------------------------------|---------------------------------------------------------------------------------------------------------|---------------------------------------------------------------------------------------------------------|---------------------------------------------------------------------------------------------------------------------|-----------------------------------------------------------------------------|
| EPI_ISL_515563                 | Hospital Municipal Dr. Jose Soares Hungria                                                              | Instituto Adolfo Lutz, Interdisciplinary Procedures Center, Strategic Laboratory                        |                                                                                                                     | Claudio Tavares Sacchi, Claudia Regina Gonçalves, Erica Valessa Ramos Gomes |
| EPI_ISL_515565                 | Hospital do Servidor Público Estadual Francisco Morato de Oliveira                                      | Instituto Adolfo Lutz, Interdisciplinary Procedures Center, Strategic Laboratory                        |                                                                                                                     | Claudio Tavares Sacchi, Claudia Regina Gonçalves, Erica Valessa Ramos Gomes |
| EPI_ISL_515566                 | PS Municipal Dr Lauro Ribas Braga                                                                       | Instituto Adolfo Lutz, Interdisciplinary Procedures Center, Strategic Laboratory                        |                                                                                                                     | Claudio Tavares Sacchi, Claudia Regina Gonçalves, Erica Valessa Ramos Gomes |
| EPI_ISL_522491                 | Center for Laboratory Control of Infectious Diseases, Korea Centers for Diseases Control and Prevention | Center for Laboratory Control of Infectious Diseases, Korea Centers for Diseases Control and Prevention | Junyoung Kim, Ae Kyung Park, Ae Kyung Shin, Jin Sun No, Jeong-Min Kim, Yoon-Seok Chung, Heui Man Kim, Myung Guk Han |                                                                             |
| EPI_ISL_523955                 | Hospital Municipal do Tatubape Carmino Caricchio                                                        | Instituto Adolfo Lutz, Interdisciplinary Procedures Center, Strategic Laboratory                        |                                                                                                                     | Claudio Tavares Sacchi, Claudia Regina Gonçalves, Erica Valessa Ramos Gomes |
| EPI_ISL_523957                 | Hospital Itamaraty                                                                                      | Instituto Adolfo Lutz, Interdisciplinary Procedures Center, Strategic Laboratory                        |                                                                                                                     | Claudio Tavares Sacchi, Claudia Regina Gonçalves, Erica Valessa Ramos Gomes |
| EPI_ISL_523958                 | Pronto Socorro Municipal de Perus                                                                       | Instituto Adolfo Lutz, Interdisciplinary Procedures Center, Strategic Laboratory                        |                                                                                                                     | Claudio Tavares Sacchi, Claudia Regina Gonçalves, Erica Valessa Ramos Gomes |
| EPI_ISL_523965                 | Hospital do Servidor Público Estadual Francisco Morato de Oliveira                                      | Instituto Adolfo Lutz, Interdisciplinary Procedures Center, Strategic Laboratory                        |                                                                                                                     | Claudio Tavares Sacchi, Claudia Regina Gonçalves, Erica Valessa Ramos Gomes |
| EPI_ISL_523969                 | Hospital Sao Paulo de Ensinho da Unifesp                                                                | Instituto Adolfo Lutz, Interdisciplinary Procedures Center, Strategic Laboratory                        |                                                                                                                     | Claudio Tavares Sacchi, Claudia Regina Gonçalves, Erica Valessa Ramos Gomes |
| EPI_ISL_523970                 | Conjunto Hospitalar do Mandaguí                                                                         | Instituto Adolfo Lutz, Interdisciplinary Procedures Center, Strategic Laboratory                        |                                                                                                                     | Claudio Tavares Sacchi, Claudia Regina Gonçalves, Erica Valessa Ramos Gomes |
| EPI_ISL_523971                 | Hospital Geral Santa Marcelina                                                                          | Instituto Adolfo Lutz, Interdisciplinary Procedures Center, Strategic Laboratory                        |                                                                                                                     | Claudio Tavares Sacchi, Claudia Regina Gonçalves, Erica Valessa Ramos Gomes |
| EPI_ISL_523974                 | Hospital Municipal do Tatubape Carmino Caricchio                                                        | Instituto Adolfo Lutz, Interdisciplinary Procedures Center, Strategic Laboratory                        |                                                                                                                     | Claudio Tavares Sacchi, Claudia Regina Gonçalves, Erica Valessa Ramos Gomes |
| EPI_ISL_523975                 | UPA Tio Lopes                                                                                           | Instituto Adolfo Lutz, Interdisciplinary Procedures Center, Strategic Laboratory                        |                                                                                                                     | Claudio Tavares Sacchi, Claudia Regina Gonçalves, Erica Valessa Ramos Gomes |
| EPI_ISL_523977                 | Hosp. Municipal Prof. Dr. Alípio Corrêa Neto                                                            | Instituto Adolfo Lutz, Interdisciplinary Procedures Center, Strategic Laboratory                        |                                                                                                                     | Claudio Tavares Sacchi, Claudia Regina Gonçalves, Erica Valessa Ramos Gomes |
| EPI_ISL_523978                 | Hospital do Servidor Público Estadual Francisco Morato de Oliveira                                      | Instituto Adolfo Lutz, Interdisciplinary Procedures Center, Strategic Laboratory                        |                                                                                                                     | Claudio Tavares Sacchi, Claudia Regina Gonçalves, Erica Valessa Ramos Gomes |
| EPI_ISL_523980                 | UPA Tio Lopes                                                                                           | Instituto Adolfo Lutz, Interdisciplinary Procedures Center, Strategic Laboratory                        |                                                                                                                     | Claudio Tavares Sacchi, Claudia Regina Gonçalves, Erica Valessa Ramos Gomes |
| EPI_ISL_523981                 | Hospital Sao Paulo de Ensinho da Unifesp                                                                | Instituto Adolfo Lutz, Interdisciplinary Procedures Center, Strategic Laboratory                        |                                                                                                                     | Claudio Tavares Sacchi, Claudia Regina Gonçalves, Erica Valessa Ramos Gomes |
| EPI_ISL_523982                 | Hospital do Servidor Público Estadual Francisco Morato de Oliveira                                      | Instituto Adolfo Lutz, Interdisciplinary Procedures Center, Strategic Laboratory                        |                                                                                                                     | Claudio Tavares Sacchi, Claudia Regina Gonçalves, Erica Valessa Ramos Gomes |
| EPI_ISL_523983                 | UPA Campo Limpo                                                                                         | Instituto Adolfo Lutz, Interdisciplinary Procedures Center, Strategic Laboratory                        |                                                                                                                     | Claudio Tavares Sacchi, Claudia Regina Gonçalves, Erica Valessa Ramos Gomes |
| EPI_ISL_523984, EPI_ISL_523986 | Ama Dr Jose Soares Hungria                                                                              | Instituto Adolfo Lutz, Interdisciplinary Procedures Center, Strategic Laboratory                        |                                                                                                                     | Claudio Tavares Sacchi, Claudia Regina Gonçalves, Erica Valessa Ramos Gomes |
| EPI_ISL_523988                 | Hospital Sao Paulo de Ensinho da Unifesp                                                                | Instituto Adolfo Lutz, Interdisciplinary Procedures Center, Strategic Laboratory                        |                                                                                                                     | Claudio Tavares Sacchi, Claudia Regina Gonçalves, Erica Valessa Ramos Gomes |
| EPI_ISL_523989                 | AMA Jardim Joamar                                                                                       | Instituto Adolfo Lutz, Interdisciplinary Procedures Center, Strategic Laboratory                        |                                                                                                                     | Claudio Tavares Sacchi, Claudia Regina Gonçalves, Erica Valessa Ramos Gomes |
| EPI_ISL_523990                 | AMA Jardim Peri                                                                                         | Instituto Adolfo Lutz, Interdisciplinary Procedures Center, Strategic Laboratory                        |                                                                                                                     | Claudio Tavares Sacchi, Claudia Regina Gonçalves, Erica Valessa Ramos Gomes |
| EPI_ISL_524462                 | Hospital Metropolitanano                                                                                | Instituto Adolfo Lutz, Interdisciplinary Procedures Center, Strategic Laboratory                        |                                                                                                                     | Claudio Tavares Sacchi, Claudia Regina Gonçalves, Erica Valessa Ramos Gomes |
| EPI_ISL_524463                 | Hospital Regional de Colta                                                                              | Instituto Adolfo Lutz, Interdisciplinary Procedures Center, Strategic Laboratory                        |                                                                                                                     | Claudio Tavares Sacchi, Claudia Regina Gonçalves, Erica Valessa Ramos Gomes |
| EPI_ISL_524464                 | Santa Casa de Santa Isabel                                                                              | Instituto Adolfo Lutz, Interdisciplinary Procedures Center, Strategic Laboratory                        |                                                                                                                     | Claudio Tavares Sacchi, Claudia Regina Gonçalves, Erica Valessa Ramos Gomes |
| EPI_ISL_524465                 | PS Municipal Dr. Caetano Virgílio Neto                                                                  | Instituto Adolfo Lutz, Interdisciplinary Procedures Center, Strategic Laboratory                        |                                                                                                                     | Claudio Tavares Sacchi, Claudia Regina Gonçalves, Erica Valessa Ramos Gomes |
| EPI_ISL_524466                 | PS Municipal Dr Lauro Ribas Braga                                                                       | Instituto Adolfo Lutz, Interdisciplinary Procedures Center, Strategic Laboratory                        |                                                                                                                     | Claudio Tavares Sacchi, Claudia Regina Gonçalves, Erica Valessa Ramos Gomes |
| EPI_ISL_524468                 | Hospital Municipal Vereador Jose Storopoli                                                              | Instituto Adolfo Lutz, Interdisciplinary Procedures Center, Strategic Laboratory                        |                                                                                                                     | Claudio Tavares Sacchi, Claudia Regina Gonçalves, Erica Valessa Ramos Gomes |
| EPI_ISL_524469                 | Santa Casa de Misericórdia de Sao Paulo                                                                 | Instituto Adolfo Lutz, Interdisciplinary Procedures Center, Strategic Laboratory                        |                                                                                                                     | Claudio Tavares Sacchi, Claudia Regina Gonçalves, Erica Valessa Ramos Gomes |
| EPI_ISL_527019, EPI_ISL_527032 | Area of Virology, Serology and Virology Division (SAVID), New South Wales Health Pathology Randwick     | Area of Virology, Serology and Virology Division (SAVID), New South Wales Health Pathology Randwick     | Rawlinson, W.                                                                                                       | Claudio Tavares Sacchi, Claudia Regina Gonçalves, Erica Valessa Ramos Gomes |
| EPI_ISL_527856                 | Hospital Municipal Prof. Waldomiro de Paula                                                             | Instituto Adolfo Lutz, Interdisciplinary Procedures Center, Strategic Laboratory                        |                                                                                                                     | Claudio Tavares Sacchi, Claudia Regina Gonçalves, Erica Valessa Ramos Gomes |
| EPI_ISL_527857                 | Hospital Regional Vale do Ribeira                                                                       | Instituto Adolfo Lutz, Interdisciplinary Procedures Center, Strategic Laboratory                        |                                                                                                                     | Claudio Tavares Sacchi, Claudia Regina Gonçalves, Erica Valessa Ramos Gomes |
| EPI_ISL_527859                 | Hospital Municipal Vereador Jose Storopoli                                                              | Instituto Adolfo Lutz, Interdisciplinary Procedures Center, Strategic Laboratory                        |                                                                                                                     | Claudio Tavares Sacchi, Claudia Regina Gonçalves, Erica Valessa Ramos Gomes |
| EPI_ISL_527860                 | Hospital Municipal de Parelheiros Josamas Castanha Braga                                                | Instituto Adolfo Lutz, Interdisciplinary Procedures Center, Strategic Laboratory                        |                                                                                                                     | Claudio Tavares Sacchi, Claudia Regina Gonçalves, Erica Valessa Ramos Gomes |

|                                                                |                                                                                           |                                                                                  |                                                                                                                                                                                                                                                                                                                                                                                                                                                                                                                                                                                                                                                                                                                                                                                                                                                                 |
|----------------------------------------------------------------|-------------------------------------------------------------------------------------------|----------------------------------------------------------------------------------|-----------------------------------------------------------------------------------------------------------------------------------------------------------------------------------------------------------------------------------------------------------------------------------------------------------------------------------------------------------------------------------------------------------------------------------------------------------------------------------------------------------------------------------------------------------------------------------------------------------------------------------------------------------------------------------------------------------------------------------------------------------------------------------------------------------------------------------------------------------------|
| EP1_SJL_527861                                                 | Hospital e Maternidade Ceiso Piarro                                                       | Instituto Adolfo Lutz, Interdisciplinary Procedures Center, Strategic Laboratory | AV. Dr. Arnaldo, 355 - Brazil, Cerqueira Cesar, São Paulo - SP, 01246-1301                                                                                                                                                                                                                                                                                                                                                                                                                                                                                                                                                                                                                                                                                                                                                                                      |
| EP1_SJL_527862                                                 | Hospital Municipal de Urgência                                                            | Instituto Adolfo Lutz, Interdisciplinary Procedures Center, Strategic Laboratory | Claudio Tavares Sacchi, Claudia Regina Gonçalves, Erica Valessa Ramos Gomes                                                                                                                                                                                                                                                                                                                                                                                                                                                                                                                                                                                                                                                                                                                                                                                     |
| EP1_SJL_527865                                                 | Hospital e Maternidade São Cristóvão                                                      | Instituto Adolfo Lutz, Interdisciplinary Procedures Center, Strategic Laboratory | Claudio Tavares Sacchi, Claudia Regina Gonçalves, Erica Valessa Ramos Gomes                                                                                                                                                                                                                                                                                                                                                                                                                                                                                                                                                                                                                                                                                                                                                                                     |
| EP1_SJL_527866                                                 | PS Municipal Dr Lauro Ribas Braga                                                         | Instituto Adolfo Lutz, Interdisciplinary Procedures Center, Strategic Laboratory | AV. Dr. Arnaldo, 355 - Brazil, Cerqueira Cesar, São Paulo - SP, 01246-1301                                                                                                                                                                                                                                                                                                                                                                                                                                                                                                                                                                                                                                                                                                                                                                                      |
| EP1_SJL_527868                                                 | Hospital e Maternidade do Braz                                                            | Instituto Adolfo Lutz, Interdisciplinary Procedures Center, Strategic Laboratory | Claudio Tavares Sacchi, Claudia Regina Gonçalves, Erica Valessa Ramos Gomes                                                                                                                                                                                                                                                                                                                                                                                                                                                                                                                                                                                                                                                                                                                                                                                     |
| EP1_SJL_527870                                                 | Hospital Municipal Mário Gatti                                                            | Instituto Adolfo Lutz, Interdisciplinary Procedures Center, Strategic Laboratory | Claudio Tavares Sacchi, Claudia Regina Gonçalves, Erica Valessa Ramos Gomes                                                                                                                                                                                                                                                                                                                                                                                                                                                                                                                                                                                                                                                                                                                                                                                     |
| EP1_SJL_534311                                                 | UPA III 26 de Agosto                                                                      | Instituto Adolfo Lutz, Interdisciplinary Procedures Center, Strategic Laboratory | Claudio Tavares Sacchi, Claudia Regina Gonçalves, Erica Valessa Ramos Gomes                                                                                                                                                                                                                                                                                                                                                                                                                                                                                                                                                                                                                                                                                                                                                                                     |
| EP1_SJL_534314                                                 | Hospital Universitario da USP de SP                                                       | Instituto Adolfo Lutz, Interdisciplinary Procedures Center, Strategic Laboratory | Claudio Tavares Sacchi, Claudia Regina Gonçalves, Erica Valessa Ramos Gomes                                                                                                                                                                                                                                                                                                                                                                                                                                                                                                                                                                                                                                                                                                                                                                                     |
| EP1_SJL_534316                                                 | OS Mun Santana Lauro Ribas Braga                                                          | Instituto Adolfo Lutz, Interdisciplinary Procedures Center, Strategic Laboratory | Claudio Tavares Sacchi, Claudia Regina Gonçalves, Erica Valessa Ramos Gomes                                                                                                                                                                                                                                                                                                                                                                                                                                                                                                                                                                                                                                                                                                                                                                                     |
| EP1_SJL_534317                                                 | Hospital Geral de Itapevi                                                                 | Instituto Adolfo Lutz, Interdisciplinary Procedures Center, Strategic Laboratory | Claudio Tavares Sacchi, Claudia Regina Gonçalves, Erica Valessa Ramos Gomes                                                                                                                                                                                                                                                                                                                                                                                                                                                                                                                                                                                                                                                                                                                                                                                     |
| EP1_SJL_534318                                                 | Hospital Municipal Antonio Giglio                                                         | Instituto Adolfo Lutz, Interdisciplinary Procedures Center, Strategic Laboratory | Claudio Tavares Sacchi, Claudia Regina Gonçalves, Erica Valessa Ramos Gomes                                                                                                                                                                                                                                                                                                                                                                                                                                                                                                                                                                                                                                                                                                                                                                                     |
| EP1_SJL_534320                                                 | Hospital do Serv Puv ESTAFECO Morato de Oliveira                                          | Instituto Adolfo Lutz, Interdisciplinary Procedures Center, Strategic Laboratory | Claudio Tavares Sacchi, Claudia Regina Gonçalves, Erica Valessa Ramos Gomes                                                                                                                                                                                                                                                                                                                                                                                                                                                                                                                                                                                                                                                                                                                                                                                     |
| EP1_SJL_534321                                                 | PS e Maternidade Nair Fonseca Leitao Arames                                               | Instituto Adolfo Lutz, Interdisciplinary Procedures Center, Strategic Laboratory | Claudio Tavares Sacchi, Claudia Regina Gonçalves, Erica Valessa Ramos Gomes                                                                                                                                                                                                                                                                                                                                                                                                                                                                                                                                                                                                                                                                                                                                                                                     |
| EP1_SJL_534322                                                 | PS Mun Julio Tupy                                                                         | Instituto Adolfo Lutz, Interdisciplinary Procedures Center, Strategic Laboratory | Claudio Tavares Sacchi, Claudia Regina Gonçalves, Erica Valessa Ramos Gomes                                                                                                                                                                                                                                                                                                                                                                                                                                                                                                                                                                                                                                                                                                                                                                                     |
| EP1_SJL_534328                                                 | Notre Dame Intermedica Saude AS                                                           | Instituto Adolfo Lutz, Interdisciplinary Procedures Center, Strategic Laboratory | Claudio Tavares Sacchi, Claudia Regina Gonçalves, Erica Valessa Ramos Gomes                                                                                                                                                                                                                                                                                                                                                                                                                                                                                                                                                                                                                                                                                                                                                                                     |
| EP1_SJL_536688                                                 | University of Wisconsin-Madison AIDS Vaccine Research Laboratories                        | University of Wisconsin-Madison AIDS Vaccine Research Laboratories               | Gage Moreno, Katarina Braun, et al, AIDS Vaccine Research Laboratories                                                                                                                                                                                                                                                                                                                                                                                                                                                                                                                                                                                                                                                                                                                                                                                          |
| EP1_SJL_541343, EP1_SJL_541344                                 | LACEN/PR                                                                                  | Laboratory of Respiratory Viruses and Measles, Oswaldo Cruz Institute, FIOCRUZ   | Paola Resende, Luciana Appolinario, Fernando Motta, Anna Carolina Mendonça, Jonathan Lopes, Irina Riediger, Maria do Carmo Dabur, Marilda Siqueira                                                                                                                                                                                                                                                                                                                                                                                                                                                                                                                                                                                                                                                                                                              |
| EP1_SJL_541354, EP1_SJL_541355, EP1_SJL_541359                 | Laboratory of Respiratory Viruses and Measles, Oswaldo Cruz Institute, FIOCRUZ            | Laboratory of Respiratory Viruses and Measles, Oswaldo Cruz Institute, FIOCRUZ   | Paola Resende, Luciana Appolinario, Fernando Motta, Anna Carolina Paixão, Ana Carolina Mendonça, Jonathan Lopes, Marilda Siqueira                                                                                                                                                                                                                                                                                                                                                                                                                                                                                                                                                                                                                                                                                                                               |
| EP1_SJL_541372, EP1_SJL_541386                                 | LACENSE                                                                                   | Laboratory of Respiratory Viruses and Measles, Oswaldo Cruz Institute, FIOCRUZ   | Paola Resende, Luciana Appolinario, Fernando Motta, Anna Carolina Paixão, Ana Carolina Mendonça, Jonathan Lopes, Ciloma Santos, Marilda Siqueira                                                                                                                                                                                                                                                                                                                                                                                                                                                                                                                                                                                                                                                                                                                |
| EP1_SJL_547433, EP1_SJL_547434, EP1_SJL_547435, EP1_SJL_547437 | Microbiology, Department of Pathology, St. Bernard's Hospital, Gibraltar Health Authority | Respiratory Virus Unit, Microbiology, Services Colindale, Public Health England  | PHE Covid Sequencing Team, Dr Nicholas Cortes (Gibraltar), Charlotte Gillborn-Jones (Gibraltar)                                                                                                                                                                                                                                                                                                                                                                                                                                                                                                                                                                                                                                                                                                                                                                 |
| EP1_SJL_547573                                                 | Vigilancia em Saude de Cajamar                                                            | Instituto Adolfo Lutz, Interdisciplinary Procedures Center, Strategic Laboratory | Claudio Tavares Sacchi, Claudia Regina Gonçalves, Erica Valessa Ramos Gomes, Karoline Rodrigues Campos                                                                                                                                                                                                                                                                                                                                                                                                                                                                                                                                                                                                                                                                                                                                                          |
| EP1_SJL_547575                                                 | SVO Juridical                                                                             | Instituto Adolfo Lutz, Interdisciplinary Procedures Center, Strategic Laboratory | Claudio Tavares Sacchi, Claudia Regina Gonçalves, Erica Valessa Ramos Gomes, Karoline Rodrigues Campos                                                                                                                                                                                                                                                                                                                                                                                                                                                                                                                                                                                                                                                                                                                                                          |
| EP1_SJL_547579                                                 | Santa Casa de Misericórdia de Aracatuba                                                   | Instituto Adolfo Lutz, Interdisciplinary Procedures Center, Strategic Laboratory | Claudio Tavares Sacchi, Claudia Regina Gonçalves, Erica Valessa Ramos Gomes, Karoline Rodrigues Campos                                                                                                                                                                                                                                                                                                                                                                                                                                                                                                                                                                                                                                                                                                                                                          |
| EP1_SJL_549084                                                 | Akershus University Hospital, Department for Microbiology and Infectious Disease Control  | Norwegian Institute of Public Health, Department of Virology                     | Kathrine Steen-Johnsen, Kamilla Heddeland Instefjord, Hilde Eishaug, Rasmus Rlis Kopperud, Hilde Symove Volian, Karoline Dragstad, Olav Hungenes                                                                                                                                                                                                                                                                                                                                                                                                                                                                                                                                                                                                                                                                                                                |
| EP1_SJL_549833                                                 | Lighthouse Lab in Milton Keynes                                                           | Wellcome Sanger Institute for the COVID-19 Genomics UK (COG-UK) consortium       | The Lighthouse Lab in Milton Keynes and Alex Alderton, Roberto Aramo, Sonia Gonçalves, Ewan Harrison, David K, Jackson, Ian Johnston, Dominic Kwiatkowski, Cordelia Langford, John Sillitoe on behalf of the Wellcome Sanger Institute COVID-19 Surveillance Team (http://www.sanger.ac.uk/covid-team)                                                                                                                                                                                                                                                                                                                                                                                                                                                                                                                                                          |
| EP1_SJL_551467                                                 | Lighthouse Lab in Alderley Park                                                           | Wellcome Sanger Institute for the COVID-19 Genomics UK (COG-UK) consortium       | The Lighthouse Lab in Alderley Park and Alex Alderton, Roberto Aramo, Sonia Gonçalves, Ewan Harrison, David K, Jackson, Ian Johnston, Dominic Kwiatkowski, Cordelia Langford, John Sillitoe on behalf of the Wellcome Sanger Institute COVID-19 Surveillance Team (http://www.sanger.ac.uk/covid-team)                                                                                                                                                                                                                                                                                                                                                                                                                                                                                                                                                          |
| EP1_SJL_572371                                                 | LACEN/PE                                                                                  | Wailaub, Agyen Magalhães Institute                                               | Marcelo Henrique Santos Paiva, Duschinka Ribeiro Duarte Guedes, Cassia Doçena, Matheus Filgueira Bezerra, Filipe Zimmer Dazotti, Luis Ceschini Machado, Larissa Korokovsky, Alexsandra Heiveco, Alexsandra Freitas da Silva, Luizson Richerson Silva Vasconcelos, Antonio Mauro Rezende, Severino Jefferson Ribeiro da Silva, Kamila Gaudento da Silva Saes, Brunna Santos Lima Figueiredo de Sá, Deriliano Lopes da Cruz, Claudio Eduardo Cavalcanti, Amarnado de Menezes Neto, Caroline Targno Alves da Silva, Herania Pessoa Garrnaro Mendes, Maria Apareia Lopes da Silva, Tiago Gadi, Paola Cristina Resende, Gonzalo Bellofi, Michele da Silva Barros, Whenerton Ricardo Corrêa do Nascimento,, Rodrigo Moraes Lajoy Arcoverde, Luciane Caroline Albuquerque Bezerra, Sivali Fhilo Branco Filho, Consistância Flávia Junqueira Ayles, Gabriel Luz Wailaub |
| EP1_SJL_574577                                                 | Hospital Municipal Dr. Ignacio Piroenra de Gouvea                                         | Instituto Adolfo Lutz, Interdisciplinary Procedures Center, Strategic Laboratory | Claudio Tavares Sacchi, Claudia Regina Gonçalves, Erica Valessa Ramos Gomes, Karoline Rodrigues Campos                                                                                                                                                                                                                                                                                                                                                                                                                                                                                                                                                                                                                                                                                                                                                          |
| EP1_SJL_574578                                                 | Hospital Municipal Mário Gatti                                                            | Instituto Adolfo Lutz, Interdisciplinary Procedures Center, Strategic Laboratory | Claudio Tavares Sacchi, Claudia Regina Gonçalves, Erica Valessa Ramos Gomes, Karoline Rodrigues Campos                                                                                                                                                                                                                                                                                                                                                                                                                                                                                                                                                                                                                                                                                                                                                          |
| EP1_SJL_574579                                                 | Hospital Municipal Dr. Ignacio Piroenra de Gouvea                                         | Instituto Adolfo Lutz, Interdisciplinary Procedures Center, Strategic Laboratory | Claudio Tavares Sacchi, Claudia Regina Gonçalves, Erica Valessa Ramos Gomes, Karoline Rodrigues Campos                                                                                                                                                                                                                                                                                                                                                                                                                                                                                                                                                                                                                                                                                                                                                          |
| EP1_SJL_574580                                                 | Hospital Cidade Tiradentes Carmen Prudente                                                | Instituto Adolfo Lutz, Interdisciplinary Procedures Center, Strategic Laboratory | Claudio Tavares Sacchi, Claudia Regina Gonçalves, Erica Valessa Ramos Gomes, Karoline Rodrigues Campos                                                                                                                                                                                                                                                                                                                                                                                                                                                                                                                                                                                                                                                                                                                                                          |
| EP1_SJL_574582                                                 | Hospital Municipal Dr. Jose Soares Hungria                                                | Instituto Adolfo Lutz, Interdisciplinary Procedures Center, Strategic Laboratory | Claudio Tavares Sacchi, Claudia Regina Gonçalves, Erica Valessa Ramos Gomes, Karoline Rodrigues Campos                                                                                                                                                                                                                                                                                                                                                                                                                                                                                                                                                                                                                                                                                                                                                          |
| EP1_SJL_574583                                                 | Secretaria Municipal de Saude de Jandira                                                  | Instituto Adolfo Lutz, Interdisciplinary Procedures Center, Strategic Laboratory | Claudio Tavares Sacchi, Claudia Regina Gonçalves, Erica Valessa Ramos Gomes, Karoline Rodrigues Campos                                                                                                                                                                                                                                                                                                                                                                                                                                                                                                                                                                                                                                                                                                                                                          |

|                                                                                                                       |                                                                                |                                                                                                                      |                                                                                                                                                                                                                                                                                                                                                                                                                                                                                                                                                                                                                                                                                                                                                                                                                                                                                                                                                    |
|-----------------------------------------------------------------------------------------------------------------------|--------------------------------------------------------------------------------|----------------------------------------------------------------------------------------------------------------------|----------------------------------------------------------------------------------------------------------------------------------------------------------------------------------------------------------------------------------------------------------------------------------------------------------------------------------------------------------------------------------------------------------------------------------------------------------------------------------------------------------------------------------------------------------------------------------------------------------------------------------------------------------------------------------------------------------------------------------------------------------------------------------------------------------------------------------------------------------------------------------------------------------------------------------------------------|
| EP _ SL _574588                                                                                                       | Hospital Estadual Sumare                                                       | Instituto Adolfo Lutz, Interdisciplinary Procedures Center, Strategic Laboratory                                     | Claudio Tavares Sacchi, Claudia Regina Gongcalves, Erica Valessa Ramos Gomes, Karoline Rodrigues Campos                                                                                                                                                                                                                                                                                                                                                                                                                                                                                                                                                                                                                                                                                                                                                                                                                                            |
| EP _ SL _574589                                                                                                       | Hospital Municipal Dr. Jose Soares Hungria                                     | Instituto Adolfo Lutz, Interdisciplinary Procedures Center, Strategic Laboratory                                     | Claudio Tavares Sacchi, Claudia Regina Gongcalves, Erica Valessa Ramos Gomes, Karoline Rodrigues Campos                                                                                                                                                                                                                                                                                                                                                                                                                                                                                                                                                                                                                                                                                                                                                                                                                                            |
| EP _ SL _574590                                                                                                       | Unidade de Primo Atendimento UPA I Santa Isabel                                | Instituto Adolfo Lutz, Interdisciplinary Procedures Center, Strategic Laboratory                                     | Claudio Tavares Sacchi, Claudia Regina Gongcalves, Erica Valessa Ramos Gomes, Karoline Rodrigues Campos                                                                                                                                                                                                                                                                                                                                                                                                                                                                                                                                                                                                                                                                                                                                                                                                                                            |
| EP _ SL _574591, EP _ SL _574592                                                                                      | Hospital Domingos Leonardo Caravolo Presidente Prudente                        | Instituto Adolfo Lutz, Interdisciplinary Procedures Center, Strategic Laboratory                                     | Claudio Tavares Sacchi, Claudia Regina Gongcalves, Erica Valessa Ramos Gomes, Karoline Rodrigues Campos                                                                                                                                                                                                                                                                                                                                                                                                                                                                                                                                                                                                                                                                                                                                                                                                                                            |
| EP _ SL _574597                                                                                                       | Secretaria Municipal de Saude de Jaturu                                        | Instituto Adolfo Lutz, Interdisciplinary Procedures Center, Strategic Laboratory                                     | Claudio Tavares Sacchi, Claudia Regina Gongcalves, Erica Valessa Ramos Gomes, Karoline Rodrigues Campos                                                                                                                                                                                                                                                                                                                                                                                                                                                                                                                                                                                                                                                                                                                                                                                                                                            |
| EP _ SL _574598                                                                                                       | Servico de Verificacao de Obito SVO                                            | Instituto Adolfo Lutz, Interdisciplinary Procedures Center, Strategic Laboratory                                     | Claudio Tavares Sacchi, Claudia Regina Gongcalves, Erica Valessa Ramos Gomes, Karoline Rodrigues Campos                                                                                                                                                                                                                                                                                                                                                                                                                                                                                                                                                                                                                                                                                                                                                                                                                                            |
| EP _ SL _579320                                                                                                       | LabPL US                                                                       | Institute of Environmental Science and Research (ESR)                                                                | Xiaoyun Ren, Matt Storey, Muhammad Faisal, Jing Wang, Hernes Perez, Ange Werner, Anje van der Linden, Ario Upton, Chris Marsell, David Hammer, Dragana Dimkovic, Gary McAuliffe, Hana Sofia Andersson, James Ussher, Jill Sherwood, Josh Feeaman, Julia Howard, Juliet Ely, Mary Dealimeda, Matt Blakiston, Matthew Rogers, Max Bloomfield, Michelle Bain, Sally Roberts, Sarah Jeffries, Sharnni Mullaiah, Susan Mopenh, Susan Taylor, Timothy Blackmore, Van Sahyendran, Veronica Payne, Virginia Hope, Erasmus Smi, Lauren Jolly, Olin Slander, Joep de Light Maden Sange, Alfredo Mei, Tim Rofert, Helena MB Seb, Smith, Michael Schweizer, Myra Bruner, Karoline Leuzinger, Kristine K. Soegaard, Alexander Garisch, Sarah Tschudin-Slater, Simon Tuns, Julia Bieckel, Hans Tagerer, Martin Stegermund, Christian Nickel, Roland Bringsler, Michael Ostroff, Sheron Bassetti, Rita Schneider-Silva, Mariana Batagay, Hans Hirsch, Adrian Egli |
| EP _ SL _581703                                                                                                       | University Hospital Basel, Clinical Virology                                   | University Hospital Basel, Clinical Bacteriology                                                                     | Anna Majer, Shari Tyson, Grace Seo, Philip Mabon, Eisle Grudecki, Rhannon Hutzlerowich, Russell Mandes, Annaleise Landgraf, Jennifer Tanner, Natalie Knox, Morag Graham, Gan Van Caesele, Jared Bullard, David Alexander, Kerry Dist, Nathalie Bastien, Yan Li, Timothy Booth, Darlan Hole, Madison Chapel, CarCOGAN's metadata curation team, Public Health Agency of Canada CarCOGAN team                                                                                                                                                                                                                                                                                                                                                                                                                                                                                                                                                        |
| EP _ SL _582342                                                                                                       | Cadham Provincial Laboratory                                                   | National Microbiology Laboratory (NML)                                                                               | Claudio Tavares Sacchi, Claudia Regina Gongcalves, Erica Valessa Ramos Gomes, Karoline Rodrigues Campos                                                                                                                                                                                                                                                                                                                                                                                                                                                                                                                                                                                                                                                                                                                                                                                                                                            |
| EP _ SL _583490                                                                                                       | Hospital Estadual Sumare                                                       | Instituto Adolfo Lutz, Interdisciplinary Procedures Center, Strategic Laboratory                                     | Claudio Tavares Sacchi, Claudia Regina Gongcalves, Erica Valessa Ramos Gomes, Karoline Rodrigues Campos                                                                                                                                                                                                                                                                                                                                                                                                                                                                                                                                                                                                                                                                                                                                                                                                                                            |
| EP _ SL _583492                                                                                                       | Santa Casa Anna Cintra                                                         | Instituto Adolfo Lutz, Interdisciplinary Procedures Center, Strategic Laboratory                                     | Claudio Tavares Sacchi, Claudia Regina Gongcalves, Erica Valessa Ramos Gomes, Karoline Rodrigues Campos                                                                                                                                                                                                                                                                                                                                                                                                                                                                                                                                                                                                                                                                                                                                                                                                                                            |
| EP _ SL _583494                                                                                                       | CS II Dr. Antonio Vicoso Moreira de Ferezeide Sumare                           | Instituto Adolfo Lutz, Interdisciplinary Procedures Center, Strategic Laboratory                                     | Claudio Tavares Sacchi, Claudia Regina Gongcalves, Erica Valessa Ramos Gomes, Karoline Rodrigues Campos                                                                                                                                                                                                                                                                                                                                                                                                                                                                                                                                                                                                                                                                                                                                                                                                                                            |
| EP _ SL _583496                                                                                                       | UPA Jandira                                                                    | Instituto Adolfo Lutz, Interdisciplinary Procedures Center, Strategic Laboratory                                     | Claudio Tavares Sacchi, Claudia Regina Gongcalves, Erica Valessa Ramos Gomes, Karoline Rodrigues Campos                                                                                                                                                                                                                                                                                                                                                                                                                                                                                                                                                                                                                                                                                                                                                                                                                                            |
| EP _ SL _583497                                                                                                       | Complexo Hospitalar Ouro Verde de Campinas                                     | Instituto Adolfo Lutz, Interdisciplinary Procedures Center, Strategic Laboratory                                     | Claudio Tavares Sacchi, Claudia Regina Gongcalves, Erica Valessa Ramos Gomes, Karoline Rodrigues Campos                                                                                                                                                                                                                                                                                                                                                                                                                                                                                                                                                                                                                                                                                                                                                                                                                                            |
| EP _ SL _583498                                                                                                       | Hospital Municipal Dr. Waldemar Tebaldi                                        | Instituto Adolfo Lutz, Interdisciplinary Procedures Center, Strategic Laboratory                                     | Claudio Tavares Sacchi, Claudia Regina Gongcalves, Erica Valessa Ramos Gomes, Karoline Rodrigues Campos                                                                                                                                                                                                                                                                                                                                                                                                                                                                                                                                                                                                                                                                                                                                                                                                                                            |
| EP _ SL _583500                                                                                                       | Centro de Saude I Tacio Leite de Carvalho e SILVA                              | Instituto Adolfo Lutz, Interdisciplinary Procedures Center, Strategic Laboratory                                     | Claudio Tavares Sacchi, Claudia Regina Gongcalves, Erica Valessa Ramos Gomes, Karoline Rodrigues Campos                                                                                                                                                                                                                                                                                                                                                                                                                                                                                                                                                                                                                                                                                                                                                                                                                                            |
| EP _ SL _583502                                                                                                       | Serv de Vig Sanitaria Epidemiolo e CTRL de Zoonoses Guaruja                    | Instituto Adolfo Lutz, Interdisciplinary Procedures Center, Strategic Laboratory                                     | Claudio Tavares Sacchi, Claudia Regina Gongcalves, Erica Valessa Ramos Gomes, Karoline Rodrigues Campos                                                                                                                                                                                                                                                                                                                                                                                                                                                                                                                                                                                                                                                                                                                                                                                                                                            |
| EP _ SL _583503                                                                                                       | CTA Centro de Testagem e Aconselhamento                                        | Instituto Adolfo Lutz, Interdisciplinary Procedures Center, Strategic Laboratory                                     | Claudio Tavares Sacchi, Claudia Regina Gongcalves, Erica Valessa Ramos Gomes, Karoline Rodrigues Campos                                                                                                                                                                                                                                                                                                                                                                                                                                                                                                                                                                                                                                                                                                                                                                                                                                            |
| EP _ SL _583505                                                                                                       | Casa de Saude Stella Maris                                                     | Instituto Adolfo Lutz, Interdisciplinary Procedures Center, Strategic Laboratory                                     | Claudio Tavares Sacchi, Claudia Regina Gongcalves, Erica Valessa Ramos Gomes, Karoline Rodrigues Campos                                                                                                                                                                                                                                                                                                                                                                                                                                                                                                                                                                                                                                                                                                                                                                                                                                            |
| EP _ SL _590506                                                                                                       | Lighthouse Lab in Glasgow                                                      | Wellcome Sanger Institute for the COVID-19 Genomics UK (COG-UK) consortium                                           | Harper VanSteenhouse, Yumi Kasai, David Gray, Carol Clugston, Anna Dominiczak and Alex Alderton, Roberto Amato, Sonia Goncalves, Ewan Harrison, David K. Jackson, Ian Johnston, Dominic Kwiatkowski, Cordelia Langford, John Sillitoe on behalf of the Wellcome Sanger Institute COVID-19 Surveillance Team ( <a href="http://www.sanger.ac.uk/covid-19team">http://www.sanger.ac.uk/covid-19team</a> )                                                                                                                                                                                                                                                                                                                                                                                                                                                                                                                                            |
| EP _ SL _591372, EP _ SL _591402, EP _ SL _591411, EP _ SL _591449, EP _ SL _591450, EP _ SL _591537, EP _ SL _591538 | Pathogen Genomics Center, National Institute of Infectious Diseases            | Pathogen Genomics Center, National Institute of Infectious Diseases                                                  | Tsuyoshi Sekizuka, Kenaro Tokawa, Rina Tanaka, Masaroni Hashino, Makoto Kuroda                                                                                                                                                                                                                                                                                                                                                                                                                                                                                                                                                                                                                                                                                                                                                                                                                                                                     |
| EP _ SL _593871                                                                                                       | South Eastern Area Laboratory Services (SEALS)                                 | NSW Health Pathology - Institute of Clinical Pathology and Medical Research, Westmead Hospital, University of Sydney |                                                                                                                                                                                                                                                                                                                                                                                                                                                                                                                                                                                                                                                                                                                                                                                                                                                                                                                                                    |
| EP _ SL _593819                                                                                                       | Respiratory Virus Unit, Microbiology Services Colindale, Public Health England | Respiratory Virus Unit, Microbiology Services Colindale, Public Health England                                       |                                                                                                                                                                                                                                                                                                                                                                                                                                                                                                                                                                                                                                                                                                                                                                                                                                                                                                                                                    |
| EP _ SL _603022                                                                                                       | Departamento de Vigilância à Saúde                                             | Instituto Adolfo Lutz, Interdisciplinary Procedures Center, Strategic Laboratory                                     | Claudio Tavares Sacchi, Claudia Regina Gongcalves, Erica Valessa Ramos Gomes, Karoline Rodrigues Campos                                                                                                                                                                                                                                                                                                                                                                                                                                                                                                                                                                                                                                                                                                                                                                                                                                            |
| EP _ SL _603023                                                                                                       | Vigilância em Saude Visa Sul                                                   | Instituto Adolfo Lutz, Interdisciplinary Procedures Center, Strategic Laboratory                                     | Claudio Tavares Sacchi, Claudia Regina Gongcalves, Erica Valessa Ramos Gomes, Karoline Rodrigues Campos                                                                                                                                                                                                                                                                                                                                                                                                                                                                                                                                                                                                                                                                                                                                                                                                                                            |
| EP _ SL _603024                                                                                                       | Santa Casa de Misericordia de Aracatuba                                        | Instituto Adolfo Lutz, Interdisciplinary Procedures Center, Strategic Laboratory                                     | Claudio Tavares Sacchi, Claudia Regina Gongcalves, Erica Valessa Ramos Gomes, Karoline Rodrigues Campos                                                                                                                                                                                                                                                                                                                                                                                                                                                                                                                                                                                                                                                                                                                                                                                                                                            |
| EP _ SL _603028                                                                                                       | Hospital Municipal Santa Ana                                                   | Instituto Adolfo Lutz, Interdisciplinary Procedures Center, Strategic Laboratory                                     | Claudio Tavares Sacchi, Claudia Regina Gongcalves, Erica Valessa Ramos Gomes, Karoline Rodrigues Campos                                                                                                                                                                                                                                                                                                                                                                                                                                                                                                                                                                                                                                                                                                                                                                                                                                            |
| EP _ SL _603030                                                                                                       | Hospital Domingos Leonardo Caravolo Presidente Prudente                        | Instituto Adolfo Lutz, Interdisciplinary Procedures Center, Strategic Laboratory                                     | Claudio Tavares Sacchi, Claudia Regina Gongcalves, Erica Valessa Ramos Gomes, Karoline Rodrigues Campos                                                                                                                                                                                                                                                                                                                                                                                                                                                                                                                                                                                                                                                                                                                                                                                                                                            |
| EP _ SL _603033                                                                                                       | Vigilância Epidemiologica de São Bernardo do Campo                             | Instituto Adolfo Lutz, Interdisciplinary Procedures Center, Strategic Laboratory                                     | Claudio Tavares Sacchi, Claudia Regina Gongcalves, Erica Valessa Ramos Gomes, Karoline Rodrigues Campos                                                                                                                                                                                                                                                                                                                                                                                                                                                                                                                                                                                                                                                                                                                                                                                                                                            |
| EP _ SL _603034                                                                                                       | Departamento de Vigilância a Saude                                             | Instituto Adolfo Lutz, Interdisciplinary Procedures Center, Strategic Laboratory                                     | Claudio Tavares Sacchi, Claudia Regina Gongcalves, Erica Valessa Ramos Gomes, Karoline Rodrigues Campos                                                                                                                                                                                                                                                                                                                                                                                                                                                                                                                                                                                                                                                                                                                                                                                                                                            |
| EP _ SL _603036                                                                                                       | Hospital Santa Ana                                                             | Instituto Adolfo Lutz, Interdisciplinary Procedures Center, Strategic Laboratory                                     | Claudio Tavares Sacchi, Claudia Regina Gongcalves, Erica Valessa Ramos Gomes, Karoline Rodrigues Campos                                                                                                                                                                                                                                                                                                                                                                                                                                                                                                                                                                                                                                                                                                                                                                                                                                            |
| EP _ SL _603037                                                                                                       | Hospital Geral de Pedreira                                                     | Instituto Adolfo Lutz, Interdisciplinary Procedures Center, Strategic Laboratory                                     | Claudio Tavares Sacchi, Claudia Regina Gongcalves, Erica Valessa Ramos Gomes, Karoline Rodrigues Campos                                                                                                                                                                                                                                                                                                                                                                                                                                                                                                                                                                                                                                                                                                                                                                                                                                            |
|                                                                                                                       |                                                                                | PHE Covid Sequencing Team                                                                                            |                                                                                                                                                                                                                                                                                                                                                                                                                                                                                                                                                                                                                                                                                                                                                                                                                                                                                                                                                    |
|                                                                                                                       |                                                                                | CIDM-PH et al.                                                                                                       |                                                                                                                                                                                                                                                                                                                                                                                                                                                                                                                                                                                                                                                                                                                                                                                                                                                                                                                                                    |

|                                                                                                                                |                                                                                                                    |                                                                                                                                   |                                                                                                                                                                                                                                                                                                                                   |
|--------------------------------------------------------------------------------------------------------------------------------|--------------------------------------------------------------------------------------------------------------------|-----------------------------------------------------------------------------------------------------------------------------------|-----------------------------------------------------------------------------------------------------------------------------------------------------------------------------------------------------------------------------------------------------------------------------------------------------------------------------------|
| EP1_ISL_603038                                                                                                                 | Santa Casa de Misericórdia de Aracatuba                                                                            | Instituto Adolfo Lutz, Interdisciplinary Procedures Center, Strategic Laboratory                                                  | Claudio Tavares Sacchi, Claudia Regina Gonçalves, Erica Valessa Ramos Gomes, Karoline Rodrigues Campos                                                                                                                                                                                                                            |
| EP1_ISL_623130                                                                                                                 | Laboratório de Virologia Molecular / UFRJU                                                                         | Bioinformatics Laboratory / LNCC                                                                                                  | Carolina M Veloch, Ronaldo S Francisco Jr., Luiz G P de Almeida, Cláudio J Brusatini, Cynthia C Cardoso, Alexandra L Garber, Ana Paula de C Guimarães, Diana Mariani, Covid19-UFRJU Workgroup, Luis Cristóvão Pinto, Renato S Aguiar, Terézinha W P Casatielras, Orlando C, Ferreira, Amílcar Tanuri, Ana Tereza R de Vasconcelos |
| EP1_ISL_629164, EP1_ISL_630998, EP1_ISL_631036                                                                                 | Lighthouse Lab in Milton Keynes<br>Public Health Ontario Laboratory                                                | Wellcome Sanger Institute for the COVID-19 Genomics UK (COG-UK) consortium<br>Public Health Ontario Laboratory                    | The Lighthouse Lab in Milton Keynes and Alex Alderton, Roberto Amato, Sonia Gonçalves, Ewan Harrison, David K, Jackson, Ian Johnson, Dominic Kwiatkowski, Cordelia Langford, John Sillince on behalf of the Wellcome Sanger Institute COVID-19 Surveillance Team                                                                  |
| EP1_ISL_640129, EP1_ISL_640130                                                                                                 | Groote Schuur Hospital wv GSH                                                                                      | NHL-SUCT                                                                                                                          | Arash Iranzadeh, Deelan Doolabh, Lynn Tyers, Buraq Galvao, Innocent Mudiou, Marinn Hsiao, Kruger Marais, Diana Handie, Stephan Korsman, Carolyn Williamson                                                                                                                                                                        |
| EP1_ISL_652142                                                                                                                 | Oxford Virotics, NDM, University of Oxford, Oxford University Hospitals, Basingsstoke and North Hampshire Hospital | COVID-19 Genomics UK (COG-UK) Consortium<br>Pathogen Genomics Center, National Institute of Infectious Diseases                   | Tanya Goldschik, David Bonsall, George MacIntyre, Amy Trebes, Mariateresa de Cesare, Cairn Moore, Alex Mobbs, Anita Justice, Robert Shaw, Monique Andersen, Timothy Peto, Emma Wise, Nathan Moore, Jessica Lynch, Nick Cortes, Mallice Mori, Stephen Kidd, David Buck, John Todd, Christophe Fraser                               |
| EP1_ISL_667561, EP1_ISL_667578, EP1_ISL_667826, EP1_ISL_667833, EP1_ISL_667839, EP1_ISL_667849, EP1_ISL_667850, EP1_ISL_667863 | Pathogen Genomics Center, National Institute of Infectious Diseases                                                | Pathogen Genomics Center, National Institute of Infectious Diseases                                                               | Tsuyoshi Sekizuka, Kenaro Itozkawa, Rina Tanaka, Masanori Hashino, Makoto Kuroda                                                                                                                                                                                                                                                  |
| EP1_ISL_672205                                                                                                                 | The Ashley Laboratory, Stanford University                                                                         | Chan-Zuckerberg Biohub                                                                                                            | CZB Chlanub Consortium                                                                                                                                                                                                                                                                                                            |
| EP1_ISL_672705, EP1_ISL_672711, EP1_ISL_672719, EP1_ISL_672720, EP1_ISL_672748                                                 | Institute of Tropical Medicine at the University of São Paulo (IMT-USP)                                            | Laboratório de Parasitologia Médica - Instituto de Medicina Tropical - Universidade de São Paulo                                  | Brazil-UK Centre for Antibovus Discovery Diagnosis Genomics and Epidemiology (CADD) Genomic Network - Instituto de Medicina Tropical                                                                                                                                                                                              |
| EP1_ISL_673528                                                                                                                 | Lighthouse Lab in Cambridge                                                                                        | Wellcome Sanger Institute for the COVID-19 Genomics UK (COG-UK) Consortium                                                        | Rob Howes, The Lighthouse Lab in Cambridge and Alex Alderton, Roberto Amato, Sonia Gonçalves, Ewan Harrison, David K, Jackson, Ian Johnston, Dominic Kwiatkowski, Cordelia Langford, John Sillince on behalf of the Wellcome Sanger Institute COVID-19 Surveillance Team                                                          |
| EP1_ISL_678320                                                                                                                 | Area of Virology, Serology and Virology Division (SAVID), New South Wales Health Pathology Randwick                | Virology Research Laboratory, Area of Virology, Serology and Virology Division (SAVID), New South Wales Health Pathology Randwick | Foster, C.; Au, J.; Ruiz Silva, M.; Devesson, I.; Bull, R.; Van Hal, S.; Rawlinson, W.                                                                                                                                                                                                                                            |
| EP1_ISL_685539, EP1_ISL_686307, EP1_ISL_686353                                                                                 | Pathogen Genomics Center, National Institute of Infectious Diseases                                                | Pathogen Genomics Center, National Institute of Infectious Diseases                                                               | Tsuyoshi Sekizuka, Kenaro Itozkawa, Rina Tanaka, Masanori Hashino, Makoto Kuroda                                                                                                                                                                                                                                                  |
| EP1_ISL_690818                                                                                                                 | Kanagawa Prefectural Institute of Public Health                                                                    | Pathogen Genomics Center, National Institute of Infectious Diseases                                                               | Tsuyoshi Sekizuka, Kenaro Itozkawa, Rina Tanaka, Masanori Hashino, Makoto Kuroda                                                                                                                                                                                                                                                  |
| EP1_ISL_693195                                                                                                                 | Hospital e Pronto Socorro Portinari                                                                                | Instituto Adolfo Lutz, Interdisciplinary Procedures Center, Strategic Laboratory                                                  | Claudio Tavares Sacchi, Claudia Regina Gonçalves, Erica Valessa Ramos Gomes, Karoline Rodrigues Campos                                                                                                                                                                                                                            |
| EP1_ISL_693196                                                                                                                 | Hospital Santa Clara                                                                                               | Instituto Adolfo Lutz, Interdisciplinary Procedures Center, Strategic Laboratory                                                  | Claudio Tavares Sacchi, Claudia Regina Gonçalves, Erica Valessa Ramos Gomes, Karoline Rodrigues Campos                                                                                                                                                                                                                            |
| EP1_ISL_693198                                                                                                                 | Santa Casa de Misericórdia de São Paulo - Hospital Central                                                         | Instituto Adolfo Lutz, Interdisciplinary Procedures Center, Strategic Laboratory                                                  | Claudio Tavares Sacchi, Claudia Regina Gonçalves, Erica Valessa Ramos Gomes, Karoline Rodrigues Campos                                                                                                                                                                                                                            |
| EP1_ISL_693199                                                                                                                 | Hospital do Servidor Público Estadual Francisco Morato de Oliveira                                                 | Instituto Adolfo Lutz, Interdisciplinary Procedures Center, Strategic Laboratory                                                  | Claudio Tavares Sacchi, Claudia Regina Gonçalves, Erica Valessa Ramos Gomes, Karoline Rodrigues Campos                                                                                                                                                                                                                            |
| EP1_ISL_693200                                                                                                                 | Hospital e Maternidade Maripora                                                                                    | Instituto Adolfo Lutz, Interdisciplinary Procedures Center, Strategic Laboratory                                                  | Claudio Tavares Sacchi, Claudia Regina Gonçalves, Erica Valessa Ramos Gomes, Karoline Rodrigues Campos                                                                                                                                                                                                                            |
| EP1_ISL_693201                                                                                                                 | Hospital Sao Paulo de Erisno da Unilesp                                                                            | Instituto Adolfo Lutz, Interdisciplinary Procedures Center, Strategic Laboratory                                                  | Claudio Tavares Sacchi, Claudia Regina Gonçalves, Erica Valessa Ramos Gomes, Karoline Rodrigues Campos                                                                                                                                                                                                                            |
| EP1_ISL_693202                                                                                                                 | Pronto Socorro Municipal Prof. João Calatin Mazono                                                                 | Instituto Adolfo Lutz, Interdisciplinary Procedures Center, Strategic Laboratory                                                  | Claudio Tavares Sacchi, Claudia Regina Gonçalves, Erica Valessa Ramos Gomes, Karoline Rodrigues Campos                                                                                                                                                                                                                            |
| EP1_ISL_693203                                                                                                                 | Hospital Municipal Doutor Arthur Ribeiro de Saboya                                                                 | Instituto Adolfo Lutz, Interdisciplinary Procedures Center, Strategic Laboratory                                                  | Claudio Tavares Sacchi, Claudia Regina Gonçalves, Erica Valessa Ramos Gomes, Karoline Rodrigues Campos                                                                                                                                                                                                                            |
| EP1_ISL_693204                                                                                                                 | Pronto Socorro Dr. Conrado Cesarino Nuvolini                                                                       | Instituto Adolfo Lutz, Interdisciplinary Procedures Center, Strategic Laboratory                                                  | Claudio Tavares Sacchi, Claudia Regina Gonçalves, Erica Valessa Ramos Gomes, Karoline Rodrigues Campos                                                                                                                                                                                                                            |
| EP1_ISL_693205                                                                                                                 | Hospital de Campanha Covid-19 Assis                                                                                | Instituto Adolfo Lutz, Interdisciplinary Procedures Center, Strategic Laboratory                                                  | Claudio Tavares Sacchi, Claudia Regina Gonçalves, Erica Valessa Ramos Gomes, Karoline Rodrigues Campos                                                                                                                                                                                                                            |
| EP1_ISL_693206                                                                                                                 | Hospital Municipal Mario Gatti                                                                                     | Instituto Adolfo Lutz, Interdisciplinary Procedures Center, Strategic Laboratory                                                  | Claudio Tavares Sacchi, Claudia Regina Gonçalves, Erica Valessa Ramos Gomes, Karoline Rodrigues Campos                                                                                                                                                                                                                            |
| EP1_ISL_693207                                                                                                                 | Cs II Doutor Antonio Vicoso Moreira de Rezende                                                                     | Instituto Adolfo Lutz, Interdisciplinary Procedures Center, Strategic Laboratory                                                  | Claudio Tavares Sacchi, Claudia Regina Gonçalves, Erica Valessa Ramos Gomes, Karoline Rodrigues Campos                                                                                                                                                                                                                            |
| EP1_ISL_693208, EP1_ISL_693209                                                                                                 | Hospital Municipal Antonio Giglio                                                                                  | Instituto Adolfo Lutz, Interdisciplinary Procedures Center, Strategic Laboratory                                                  | Claudio Tavares Sacchi, Claudia Regina Gonçalves, Erica Valessa Ramos Gomes, Karoline Rodrigues Campos                                                                                                                                                                                                                            |
| EP1_ISL_693210                                                                                                                 | Pronto-Socorro Dr. Osmar Mesquita                                                                                  | Instituto Adolfo Lutz, Interdisciplinary Procedures Center, Strategic Laboratory                                                  | Claudio Tavares Sacchi, Claudia Regina Gonçalves, Erica Valessa Ramos Gomes, Karoline Rodrigues Campos                                                                                                                                                                                                                            |
| EP1_ISL_693211                                                                                                                 | Santa Casa de Misericórdia e Maternidade                                                                           | Instituto Adolfo Lutz, Interdisciplinary Procedures Center, Strategic Laboratory                                                  | Claudio Tavares Sacchi, Claudia Regina Gonçalves, Erica Valessa Ramos Gomes, Karoline Rodrigues Campos                                                                                                                                                                                                                            |
| EP1_ISL_693212                                                                                                                 | Santa Casa de Misericórdia de Braganca Paulista                                                                    | Instituto Adolfo Lutz, Interdisciplinary Procedures Center, Strategic Laboratory                                                  | Claudio Tavares Sacchi, Claudia Regina Gonçalves, Erica Valessa Ramos Gomes, Karoline Rodrigues Campos                                                                                                                                                                                                                            |
| EP1_ISL_693214                                                                                                                 | Unidade de Pronto Atendimento Central de Caragatatuba                                                              | Instituto Adolfo Lutz, Interdisciplinary Procedures Center, Strategic Laboratory                                                  | Claudio Tavares Sacchi, Claudia Regina Gonçalves, Erica Valessa Ramos Gomes, Karoline Rodrigues Campos                                                                                                                                                                                                                            |
| EP1_ISL_693215                                                                                                                 | Secretaria Municipal de Saúde de Itacemapolis                                                                      | Instituto Adolfo Lutz, Interdisciplinary Procedures Center, Strategic Laboratory                                                  | Claudio Tavares Sacchi, Claudia Regina Gonçalves, Erica Valessa Ramos Gomes, Karoline Rodrigues Campos                                                                                                                                                                                                                            |
| EP1_ISL_693216, EP1_ISL_693217                                                                                                 | Unidade de Vigilância Epidemiológica de Araras                                                                     | Instituto Adolfo Lutz, Interdisciplinary Procedures Center, Strategic Laboratory                                                  | Claudio Tavares Sacchi, Claudia Regina Gonçalves, Erica Valessa Ramos Gomes, Karoline Rodrigues Campos                                                                                                                                                                                                                            |
| EP1_ISL_693223, EP1_ISL_693224                                                                                                 | Laboratório Municipal de Piracicaba                                                                                | Instituto Adolfo Lutz, Interdisciplinary Procedures Center, Strategic Laboratory                                                  | Claudio Tavares Sacchi, Claudia Regina Gonçalves, Erica Valessa Ramos Gomes, Karoline Rodrigues Campos                                                                                                                                                                                                                            |

|                                                                                                                                                                                                                                                                                                                                                                                                |                                                                                                  |                                                                                  |                                                                                                                                                                                                                                                                                                   |
|------------------------------------------------------------------------------------------------------------------------------------------------------------------------------------------------------------------------------------------------------------------------------------------------------------------------------------------------------------------------------------------------|--------------------------------------------------------------------------------------------------|----------------------------------------------------------------------------------|---------------------------------------------------------------------------------------------------------------------------------------------------------------------------------------------------------------------------------------------------------------------------------------------------|
| EPI_ISL_693225                                                                                                                                                                                                                                                                                                                                                                                 | Urs Vila Rosa - Olimpia Gomes De Almeida                                                         | Instituto Adolfo Lutz, Interdisciplinary Procedures Center, Strategic Laboratory | Claudio Tavares Sacchi, Claudia Regina Gonçalves, Erica Valessa Ramos Gomes, Karoline Rodrigues Campos                                                                                                                                                                                            |
| EPI_ISL_693228                                                                                                                                                                                                                                                                                                                                                                                 | Unidade de Pronto Atendimento Sao Jose                                                           | Instituto Adolfo Lutz, Interdisciplinary Procedures Center, Strategic Laboratory | Claudio Tavares Sacchi, Claudia Regina Gonçalves, Erica Valessa Ramos Gomes, Karoline Rodrigues Campos                                                                                                                                                                                            |
| EPI_ISL_693228                                                                                                                                                                                                                                                                                                                                                                                 | Secretaria Municipal de Sorocaba                                                                 | Instituto Adolfo Lutz, Interdisciplinary Procedures Center, Strategic Laboratory | Claudio Tavares Sacchi, Claudia Regina Gonçalves, Erica Valessa Ramos Gomes, Karoline Rodrigues Campos                                                                                                                                                                                            |
| EPI_ISL_693229                                                                                                                                                                                                                                                                                                                                                                                 | Hospital 8 de Maio                                                                               | Instituto Adolfo Lutz, Interdisciplinary Procedures Center, Strategic Laboratory | Claudio Tavares Sacchi, Claudia Regina Gonçalves, Erica Valessa Ramos Gomes, Karoline Rodrigues Campos                                                                                                                                                                                            |
| EPI_ISL_693230                                                                                                                                                                                                                                                                                                                                                                                 | Hospital e Pronto Socorro Portinari                                                              | Instituto Adolfo Lutz, Interdisciplinary Procedures Center, Strategic Laboratory | Claudio Tavares Sacchi, Claudia Regina Gonçalves, Erica Valessa Ramos Gomes, Karoline Rodrigues Campos                                                                                                                                                                                            |
| EPI_ISL_693231                                                                                                                                                                                                                                                                                                                                                                                 | Pronto Socorro Municipal de Santa Branca                                                         | Instituto Adolfo Lutz, Interdisciplinary Procedures Center, Strategic Laboratory | Claudio Tavares Sacchi, Claudia Regina Gonçalves, Erica Valessa Ramos Gomes, Karoline Rodrigues Campos                                                                                                                                                                                            |
| EPI_ISL_693232                                                                                                                                                                                                                                                                                                                                                                                 | Hospital e Pronto Socorro Portinari                                                              | Instituto Adolfo Lutz, Interdisciplinary Procedures Center, Strategic Laboratory | Claudio Tavares Sacchi, Claudia Regina Gonçalves, Erica Valessa Ramos Gomes, Karoline Rodrigues Campos                                                                                                                                                                                            |
| EPI_ISL_693233                                                                                                                                                                                                                                                                                                                                                                                 | Hospital Santa Cruz                                                                              | Instituto Adolfo Lutz, Interdisciplinary Procedures Center, Strategic Laboratory | Claudio Tavares Sacchi, Claudia Regina Gonçalves, Erica Valessa Ramos Gomes, Karoline Rodrigues Campos                                                                                                                                                                                            |
| EPI_ISL_693234                                                                                                                                                                                                                                                                                                                                                                                 | Upa Vereador Jose Da Rocha Goncalves                                                             | Instituto Adolfo Lutz, Interdisciplinary Procedures Center, Strategic Laboratory | Claudio Tavares Sacchi, Claudia Regina Gonçalves, Erica Valessa Ramos Gomes, Karoline Rodrigues Campos                                                                                                                                                                                            |
| EPI_ISL_693235                                                                                                                                                                                                                                                                                                                                                                                 | Casmi Centro Atendimento Saude da Mulher e Infancia                                              | Instituto Adolfo Lutz, Interdisciplinary Procedures Center, Strategic Laboratory | Claudio Tavares Sacchi, Claudia Regina Gonçalves, Erica Valessa Ramos Gomes, Karoline Rodrigues Campos                                                                                                                                                                                            |
| EPI_ISL_693238                                                                                                                                                                                                                                                                                                                                                                                 | Hospital Santa Marcelina Sao Paulo                                                               | Instituto Adolfo Lutz, Interdisciplinary Procedures Center, Strategic Laboratory | Claudio Tavares Sacchi, Claudia Regina Gonçalves, Erica Valessa Ramos Gomes, Karoline Rodrigues Campos                                                                                                                                                                                            |
| EPI_ISL_693237                                                                                                                                                                                                                                                                                                                                                                                 | UPA Santa Isabel                                                                                 | Instituto Adolfo Lutz, Interdisciplinary Procedures Center, Strategic Laboratory | Claudio Tavares Sacchi, Claudia Regina Gonçalves, Erica Valessa Ramos Gomes, Karoline Rodrigues Campos                                                                                                                                                                                            |
| EPI_ISL_693239                                                                                                                                                                                                                                                                                                                                                                                 | Secao Centro de Diagnostico Secedi                                                               | Instituto Adolfo Lutz, Interdisciplinary Procedures Center, Strategic Laboratory | Claudio Tavares Sacchi, Claudia Regina Gonçalves, Erica Valessa Ramos Gomes, Karoline Rodrigues Campos                                                                                                                                                                                            |
| EPI_ISL_693240                                                                                                                                                                                                                                                                                                                                                                                 | Centro de Vigilância a Saude de Diadema                                                          | Instituto Adolfo Lutz, Interdisciplinary Procedures Center, Strategic Laboratory | Claudio Tavares Sacchi, Claudia Regina Gonçalves, Erica Valessa Ramos Gomes, Karoline Rodrigues Campos                                                                                                                                                                                            |
| EPI_ISL_693241                                                                                                                                                                                                                                                                                                                                                                                 | Hospital e Maternidade Sao Lucas                                                                 | Instituto Adolfo Lutz, Interdisciplinary Procedures Center, Strategic Laboratory | Claudio Tavares Sacchi, Claudia Regina Gonçalves, Erica Valessa Ramos Gomes, Karoline Rodrigues Campos                                                                                                                                                                                            |
| EPI_ISL_693242                                                                                                                                                                                                                                                                                                                                                                                 | Centro de Vigilância a Saude de Diadema                                                          | Instituto Adolfo Lutz, Interdisciplinary Procedures Center, Strategic Laboratory | Claudio Tavares Sacchi, Claudia Regina Gonçalves, Erica Valessa Ramos Gomes, Karoline Rodrigues Campos                                                                                                                                                                                            |
| EPI_ISL_693243                                                                                                                                                                                                                                                                                                                                                                                 | Laboratório Municipal de Piracicaba                                                              | Instituto Adolfo Lutz, Interdisciplinary Procedures Center, Strategic Laboratory | Claudio Tavares Sacchi, Claudia Regina Gonçalves, Erica Valessa Ramos Gomes, Karoline Rodrigues Campos                                                                                                                                                                                            |
| EPI_ISL_693244                                                                                                                                                                                                                                                                                                                                                                                 | Centro Medico da Policia Militar do Estado de Sao Paulo                                          | Instituto Adolfo Lutz, Interdisciplinary Procedures Center, Strategic Laboratory | Claudio Tavares Sacchi, Claudia Regina Gonçalves, Erica Valessa Ramos Gomes, Karoline Rodrigues Campos                                                                                                                                                                                            |
| EPI_ISL_693245                                                                                                                                                                                                                                                                                                                                                                                 | UPA Santa Isabel                                                                                 | Instituto Adolfo Lutz, Interdisciplinary Procedures Center, Strategic Laboratory | Claudio Tavares Sacchi, Claudia Regina Gonçalves, Erica Valessa Ramos Gomes, Karoline Rodrigues Campos                                                                                                                                                                                            |
| EPI_ISL_693278                                                                                                                                                                                                                                                                                                                                                                                 | unknown                                                                                          | Public Health Virology Laboratory, Forensic and Scientific Services (PHV-FSS)    | Son Nguyen et al.                                                                                                                                                                                                                                                                                 |
| EPI_ISL_703238                                                                                                                                                                                                                                                                                                                                                                                 | Lighthouse Lab in Alderley Park                                                                  | Wellcome Sanger Institute for the COVID-19 Genomics UK (COG-UK) Consortium       | Jacquelyn Wynn, Mairead Hyland, The Lighthouse Lab in Alderley Park and Alex Alderton, Roberto Anato, Sonia Gonçalves, Ewan Harrison, David K. Jackson, Ian Johnston, Dominic Kwiatkowski, Cordeila Langford, John Sillitoe on behalf of the Wellcome Sanger Institute COVID-19 Surveillance Team |
| EPI_ISL_717807, EPI_ISL_717808, EPI_ISL_717810, EPI_ISL_717811, EPI_ISL_717812, EPI_ISL_717813, EPI_ISL_717814, EPI_ISL_717815, EPI_ISL_717816, EPI_ISL_717817, EPI_ISL_717818, EPI_ISL_717819, EPI_ISL_717820, EPI_ISL_717821, EPI_ISL_717822, EPI_ISL_717823, EPI_ISL_717824, EPI_ISL_717825, EPI_ISL_717826, EPI_ISL_717827, EPI_ISL_717828, EPI_ISL_717829, EPI_ISL_717830, EPI_ISL_717823 | Laboratorio de Virologia Molecular / UFRJ                                                        | Bioninformatics Laboratory / LNCC                                                | Carolina M Vajoch, Ronaldo da Silva F Jr, Luiz G P de Almeida, Cynthia C Cardoso, Otavio Bustrioli, Alexandra L Garber, Ana Paula de C Guimarães, Diana Mariani, Andreia Cony Cavalcanti, Claudia dos Santos Rodrigues, Terezinha M P P Castilheira, Amílcar Tanuri, Ana Tereza R de Vasconcelos  |
| EPI_ISL_721601                                                                                                                                                                                                                                                                                                                                                                                 | Pathogen Genomics Center, National Institute of Infectious Diseases                              | Pathogen Genomics Center, National Institute of Infectious Diseases              | Tsuyoshi Sekizuka, Kenaro Itokawa, Rina Tanaka, Messaroti Hashino, Makoto Kuroda                                                                                                                                                                                                                  |
| EPI_ISL_728187                                                                                                                                                                                                                                                                                                                                                                                 | National Public Health Laboratory, National Centre for Infectious Diseases                       | National Public Health Laboratory, National Centre for Infectious Diseases       | Tze Min Mak, Sophie Ocarvia, Zhenyang Zhou, Lin Cui, Raymond Tze Pin Lin                                                                                                                                                                                                                          |
| see above                                                                                                                                                                                                                                                                                                                                                                                      | Laboratorio Central de Saude Publica do Estado do Rio Grande do Sul (LACEN-RS)                   | Laboratory of Respiratory Viruses and Masses, Oswaldo Cruz Institute, HOCORUZ    | Paula Resende, Luciana Appolinario, Fernando Motta, Anna Carolina Paixão, Ana Carolina Mendonça, Tatiana Scharif Gregalini, Marilda Tereza Mar da Rosa, Marilda Saquetta                                                                                                                          |
| EPI_ISL_732052                                                                                                                                                                                                                                                                                                                                                                                 | Instituto Nacional de Saude (INSA)                                                               | Instituto Nacional de Saude (INSA)                                               | Borges et al                                                                                                                                                                                                                                                                                      |
| EPI_ISL_732179, EPI_ISL_732180, EPI_ISL_732181, EPI_ISL_732183, EPI_ISL_732184, EPI_ISL_732282                                                                                                                                                                                                                                                                                                 | Instituto Nacional de Saude (INSA) and Instituto Gulbenkian de Ciencia (IGC)                     | Instituto Nacional de Saude (INSA) and Instituto Gulbenkian de Ciencia (IGC)     | Borges et al                                                                                                                                                                                                                                                                                      |
| EPI_ISL_732856, EPI_ISL_732909, EPI_ISL_732914                                                                                                                                                                                                                                                                                                                                                 | genXone SA, Molecular Diagnostics Laboratory / NZOZ                                              | genXone SA, Research & Development Laboratory                                    | Maciej Szymulski, Girazgoz Nowicki, Monika Makowska-Woniak, Jakub Grabowski, Natalia Druwka-Matejska, Ukasz Krych, Michal Kaszuba                                                                                                                                                                 |
| EPI_ISL_733121                                                                                                                                                                                                                                                                                                                                                                                 | HELIX LLC                                                                                        | WHO National Influenza Centre Russian Federation                                 | Andrey Komissarov, Artem Fadeev, Anna Ivanova, Kseniya Komissarova, Dmitry Bazhenov, Daria Danilenko, Ksenia Salina, Elena Nadeeva, Georgii Bazzykin, Dmitry Luzovov                                                                                                                              |
| EPI_ISL_733300                                                                                                                                                                                                                                                                                                                                                                                 | WHO National Influenza Centre Russian Federation                                                 | WHO National Influenza Centre Russian Federation                                 | Andrey Komissarov, Artem Fadeev, Anna Ivanova, Kseniya Komissarova, Dmitry Bazhenov, Daria Danilenko, Ksenia Salina, Elena Nadeeva, Georgii Bazzykin, Dmitry Luzovov                                                                                                                              |
| EPI_ISL_734865                                                                                                                                                                                                                                                                                                                                                                                 | UZ Leuven, National Reference Laboratory for Coronaviruses, Laboratory Medicine, Leuven, Belgium | KU Leuven, Rega Institute, Clinical and Epidemiological Virology                 | Tony Wawina-Bokelanga, Joan Marti-Caterras, Bert Vanmechelen, Piet Wases                                                                                                                                                                                                                          |
| EPI_ISL_735396                                                                                                                                                                                                                                                                                                                                                                                 | Hospital de Campiana COVID 19 SER                                                                | Instituto Adolfo Lutz, Interdisciplinary Procedures Center, Strategic Laboratory | Claudio Tavares Sacchi, Claudia Regina Gonçalves, Erica Valessa Ramos Gomes, Karoline Rodrigues Campos                                                                                                                                                                                            |
| EPI_ISL_735397                                                                                                                                                                                                                                                                                                                                                                                 | Unidade Respiratoria Nova Horrolandia                                                            | Instituto Adolfo Lutz, Interdisciplinary Procedures Center, Strategic Laboratory | Claudio Tavares Sacchi, Claudia Regina Gonçalves, Erica Valessa Ramos Gomes, Karoline Rodrigues Campos                                                                                                                                                                                            |
| EPI_ISL_735398                                                                                                                                                                                                                                                                                                                                                                                 | Laboratorio Fleury                                                                               | Instituto Adolfo Lutz, Interdisciplinary Procedures Center.                      | Claudio Tavares Sacchi, Claudia Regina Gonçalves, Erica Valessa Ramos Gomes, Karoline Rodrigues Campos                                                                                                                                                                                            |

|                                                                                                                                                                                                |                                                                                                                                        |                                                                                                                                        |                                                                                                                                                                                                                                                                                                                                                                                                                                                                                 |
|------------------------------------------------------------------------------------------------------------------------------------------------------------------------------------------------|----------------------------------------------------------------------------------------------------------------------------------------|----------------------------------------------------------------------------------------------------------------------------------------|---------------------------------------------------------------------------------------------------------------------------------------------------------------------------------------------------------------------------------------------------------------------------------------------------------------------------------------------------------------------------------------------------------------------------------------------------------------------------------|
| EPI_ISL_735399                                                                                                                                                                                 | Hospital Municipal Dr'Ignacio de gouvea                                                                                                | Strategic Laboratory                                                                                                                   | Claudio Tavares Sacchi, Claudia Regina Gongcalves, Erica Valessa Ramos Gomes, Karoline Rodrigues Campos                                                                                                                                                                                                                                                                                                                                                                         |
| EPI_ISL_735400                                                                                                                                                                                 | Instituto Adolfo Lutz - Regional de Santos                                                                                             | Instituto Adolfo Lutz, Interdisciplinary Procedures Center, Strategic Laboratory                                                       | Claudio Tavares Sacchi, Claudia Regina Gongcalves, Erica Valessa Ramos Gomes, Karoline Rodrigues Campos                                                                                                                                                                                                                                                                                                                                                                         |
| EPI_ISL_735402, EPI_ISL_735403, EPI_ISL_735404                                                                                                                                                 | Instituto Adolfo Lutz - Regional de Rio Claro                                                                                          | Instituto Adolfo Lutz, Interdisciplinary Procedures Center, Strategic Laboratory                                                       | Claudio Tavares Sacchi, Claudia Regina Gongcalves, Erica Valessa Ramos Gomes, Karoline Rodrigues Campos                                                                                                                                                                                                                                                                                                                                                                         |
| EPI_ISL_735406                                                                                                                                                                                 | Unidade de Pronto Atendimento UFA   Sta Isabel                                                                                         | Instituto Adolfo Lutz, Interdisciplinary Procedures Center, Strategic Laboratory                                                       | Claudio Tavares Sacchi, Claudia Regina Gongcalves, Erica Valessa Ramos Gomes, Karoline Rodrigues Campos                                                                                                                                                                                                                                                                                                                                                                         |
| EPI_ISL_735408                                                                                                                                                                                 | COVID 19 Centro de Combate ao Coronavirus OCC Jandira                                                                                  | Instituto Adolfo Lutz, Interdisciplinary Procedures Center, Strategic Laboratory                                                       | Claudio Tavares Sacchi, Claudia Regina Gongcalves, Erica Valessa Ramos Gomes, Karoline Rodrigues Campos                                                                                                                                                                                                                                                                                                                                                                         |
| EPI_ISL_735409                                                                                                                                                                                 | Unidade de Pronto Atendimento Carlos Lourenco                                                                                          | Instituto Adolfo Lutz, Interdisciplinary Procedures Center, Strategic Laboratory                                                       | Claudio Tavares Sacchi, Claudia Regina Gongcalves, Erica Valessa Ramos Gomes, Karoline Rodrigues Campos                                                                                                                                                                                                                                                                                                                                                                         |
| EPI_ISL_735411                                                                                                                                                                                 | Centro de Vigilancia a Saude de Diadema                                                                                                | Instituto Adolfo Lutz, Interdisciplinary Procedures Center, Strategic Laboratory                                                       | Claudio Tavares Sacchi, Claudia Regina Gongcalves, Erica Valessa Ramos Gomes, Karoline Rodrigues Campos                                                                                                                                                                                                                                                                                                                                                                         |
| EPI_ISL_735412                                                                                                                                                                                 | Hospital e Pronto Socorro Portinari                                                                                                    | Instituto Adolfo Lutz, Interdisciplinary Procedures Center, Strategic Laboratory                                                       | Claudio Tavares Sacchi, Claudia Regina Gongcalves, Erica Valessa Ramos Gomes, Karoline Rodrigues Campos                                                                                                                                                                                                                                                                                                                                                                         |
| EPI_ISL_735413                                                                                                                                                                                 | Militeiro Centro de Diagnosticos e Biopesquisa Clinica                                                                                 | Instituto Adolfo Lutz, Interdisciplinary Procedures Center, Strategic Laboratory                                                       | Claudio Tavares Sacchi, Claudia Regina Gongcalves, Erica Valessa Ramos Gomes, Karoline Rodrigues Campos                                                                                                                                                                                                                                                                                                                                                                         |
| EPI_ISL_735417                                                                                                                                                                                 | Unidade de Pronto Atendimento de Acajur de Campos                                                                                      | Instituto Adolfo Lutz, Interdisciplinary Procedures Center, Strategic Laboratory                                                       | Claudio Tavares Sacchi, Claudia Regina Gongcalves, Erica Valessa Ramos Gomes, Karoline Rodrigues Campos                                                                                                                                                                                                                                                                                                                                                                         |
| EPI_ISL_735419                                                                                                                                                                                 | UBS Avarenga                                                                                                                           | Instituto Adolfo Lutz, Interdisciplinary Procedures Center, Strategic Laboratory                                                       | Claudio Tavares Sacchi, Claudia Regina Gongcalves, Erica Valessa Ramos Gomes, Karoline Rodrigues Campos                                                                                                                                                                                                                                                                                                                                                                         |
| EPI_ISL_735421                                                                                                                                                                                 | UBS Sta Terezinha                                                                                                                      | Instituto Adolfo Lutz, Interdisciplinary Procedures Center, Strategic Laboratory                                                       | Claudio Tavares Sacchi, Claudia Regina Gongcalves, Erica Valessa Ramos Gomes, Karoline Rodrigues Campos                                                                                                                                                                                                                                                                                                                                                                         |
| EPI_ISL_735422                                                                                                                                                                                 | UBS Damachi                                                                                                                            | Instituto Adolfo Lutz, Interdisciplinary Procedures Center, Strategic Laboratory                                                       | Claudio Tavares Sacchi, Claudia Regina Gongcalves, Erica Valessa Ramos Gomes, Karoline Rodrigues Campos                                                                                                                                                                                                                                                                                                                                                                         |
| EPI_ISL_735423, EPI_ISL_735424, EPI_ISL_735428                                                                                                                                                 | Centro de Vigilancia a Saude de Diadema                                                                                                | Instituto Adolfo Lutz, Interdisciplinary Procedures Center, Strategic Laboratory                                                       | Claudio Tavares Sacchi, Claudia Regina Gongcalves, Erica Valessa Ramos Gomes, Karoline Rodrigues Campos                                                                                                                                                                                                                                                                                                                                                                         |
| EPI_ISL_735429, EPI_ISL_735431                                                                                                                                                                 | Hospital Nipo Brasileiro                                                                                                               | Instituto Adolfo Lutz, Interdisciplinary Procedures Center, Strategic Laboratory                                                       | Claudio Tavares Sacchi, Claudia Regina Gongcalves, Erica Valessa Ramos Gomes, Karoline Rodrigues Campos                                                                                                                                                                                                                                                                                                                                                                         |
| EPI_ISL_735433                                                                                                                                                                                 | Posto de Atendimento Saude Cidade Pasc Cajati                                                                                          | Instituto Adolfo Lutz, Interdisciplinary Procedures Center, Strategic Laboratory                                                       | Claudio Tavares Sacchi, Claudia Regina Gongcalves, Erica Valessa Ramos Gomes, Karoline Rodrigues Campos                                                                                                                                                                                                                                                                                                                                                                         |
| EPI_ISL_736895                                                                                                                                                                                 | Pathogen Genomics Center, National Institute of Infectious Diseases                                                                    | Pathogen Genomics Center, National Institute of Infectious Diseases                                                                    | Tsuyoshi Sezizuka, Kenaro Itoakawa, Rina Tanaka, Masanori Hashino, Makoto Kuroda                                                                                                                                                                                                                                                                                                                                                                                                |
| EPI_ISL_745827, EPI_ISL_745885                                                                                                                                                                 | Ginkgo Bioworks Clinical Laboratory                                                                                                    | Utah Public Health Laboratory                                                                                                          | Erin L. Young, Kelly Oakesson, Tara Gallagher, Michael T. Pyne E. Susan Siedtha, Melanie A. Malloy, Jeffrey B. Stevenson, Salkka M. Shakti, David R. Hilliard, Malika McKenzie-Bennett, James McGann, Jim Griffin, Keith Robison, Alex Pock, Becky Schilling, Martha Pierson, Rebecca Littlefield, Michelle Spencer, Birgitte Simen                                                                                                                                             |
| EPI_ISL_746886                                                                                                                                                                                 | Genetica Molecular and Subdepartamento de Virologia (SP Chile                                                                          | Instituto de Salud Publica de Chile                                                                                                    | Javier Tognarelli, Barbara Parra, Loredana Arata, Jaime Lagos, Giselle Barra, Patricia Bustos, Rodrigo Fasse, Andres Castillo, Jorge Fernandez                                                                                                                                                                                                                                                                                                                                  |
| EPI_ISL_747237                                                                                                                                                                                 | Division of Emerging Infectious Diseases, Bureau of Infectious Diseases Diagnosis Control, Korea Disease Control and Prevention Agency | Division of Emerging Infectious Diseases, Bureau of Infectious Diseases Diagnosis Control, Korea Disease Control and Prevention Agency | Ae Kyung Park, Il-Hwan Kim, Heui Man Kim, Jeong-Min Kim, Namjoon Lee, Chaeyoung Lee, Sang Hee Woo, Eun-Jin Kim                                                                                                                                                                                                                                                                                                                                                                  |
| EPI_ISL_754913                                                                                                                                                                                 | Laboratory Diagnostics and Clinical Immunology of Developmental Age, Medical University of Warsaw                                      | genXone SA, Research & Development Laboratory, The Faculty of Mathematics, Informatics and Mechanics of the University of Warsaw       | Maciej Sykulski, Grzegorz Nowicki, Monika Makowska-Wojcik, Jakub Grabowski, Natalia Dwiska-Matejska, ukasz Krych, Micha Kaszuba, Anna Gambin, Urszula Demkow                                                                                                                                                                                                                                                                                                                    |
| EPI_ISL_755640                                                                                                                                                                                 | Instituto Adolfo Lutz - Central                                                                                                        | Instituto Adolfo Lutz, Interdisciplinary Procedures Center, Strategic Laboratory                                                       | Claudio Tavares Sacchi, Claudia Regina Gongcalves, Erica Valessa Ramos Gomes, Karoline Rodrigues Campos                                                                                                                                                                                                                                                                                                                                                                         |
| EPI_ISL_755641                                                                                                                                                                                 | Instituto Adolfo Lutz - Regional de Santo Andre                                                                                        | Instituto Adolfo Lutz, Interdisciplinary Procedures Center, Strategic Laboratory                                                       | Claudio Tavares Sacchi, Claudia Regina Gongcalves, Erica Valessa Ramos Gomes, Karoline Rodrigues Campos                                                                                                                                                                                                                                                                                                                                                                         |
| EPI_ISL_755643                                                                                                                                                                                 | Instituto Adolfo Lutz - Central                                                                                                        | Instituto Adolfo Lutz, Interdisciplinary Procedures Center, Strategic Laboratory                                                       | Claudio Tavares Sacchi, Claudia Regina Gongcalves, Erica Valessa Ramos Gomes, Karoline Rodrigues Campos                                                                                                                                                                                                                                                                                                                                                                         |
| EPI_ISL_755644                                                                                                                                                                                 | Lab LOC - Itapeceira da Serra                                                                                                          | Instituto Adolfo Lutz, Interdisciplinary Procedures Center, Strategic Laboratory                                                       | Claudio Tavares Sacchi, Claudia Regina Gongcalves, Erica Valessa Ramos Gomes, Karoline Rodrigues Campos                                                                                                                                                                                                                                                                                                                                                                         |
| EPI_ISL_755646                                                                                                                                                                                 | Instituto Adolfo Lutz - Regional de Santo Andre                                                                                        | Instituto Adolfo Lutz, Interdisciplinary Procedures Center, Strategic Laboratory                                                       | Claudio Tavares Sacchi, Claudia Regina Gongcalves, Erica Valessa Ramos Gomes, Karoline Rodrigues Campos                                                                                                                                                                                                                                                                                                                                                                         |
| EPI_ISL_755660                                                                                                                                                                                 | Instituto Adolfo Lutz - Regional de Taubate                                                                                            | Instituto Adolfo Lutz, Interdisciplinary Procedures Center, Strategic Laboratory                                                       | Claudio Tavares Sacchi, Claudia Regina Gongcalves, Erica Valessa Ramos Gomes, Karoline Rodrigues Campos                                                                                                                                                                                                                                                                                                                                                                         |
| EPI_ISL_755655                                                                                                                                                                                 | Instituto Adolfo Lutz - Regional de Campinas                                                                                           | Instituto Adolfo Lutz, Interdisciplinary Procedures Center, Strategic Laboratory                                                       | Claudio Tavares Sacchi, Claudia Regina Gongcalves, Erica Valessa Ramos Gomes, Karoline Rodrigues Campos                                                                                                                                                                                                                                                                                                                                                                         |
| EPI_ISL_760983                                                                                                                                                                                 | Lighthouse Lab in Milton Keynes                                                                                                        | Wellcome Sanger Institute for the COVID-19 Genomics UK (COG-UK) Consortium                                                             | The Lighthouse Lab in Milton Keynes and Alex Alderton, Roberto Amato, Sonia Goncalves, Ewan Harrison, David K. Jackson, Ian Johnson, Dominic Kwiatkowski, Cordelia Langford, John Sillitoe on behalf of the Wellcome Sanger Institute COVID-19 Surveillance Team                                                                                                                                                                                                                |
| EPI_ISL_768652, EPI_ISL_768654, EPI_ISL_768709                                                                                                                                                 | Pathogen Genomics Center, National Institute of Infectious Diseases                                                                    | Pathogen Genomics Center, National Institute of Infectious Diseases                                                                    | Tsuyoshi Sezizuka, Kenaro Itoakawa, Rina Tanaka, Masanori Hashino, Makoto Kuroda                                                                                                                                                                                                                                                                                                                                                                                                |
| EPI_ISL_770555, EPI_ISL_770558, EPI_ISL_770562, EPI_ISL_770573, EPI_ISL_770579, EPI_ISL_770582, EPI_ISL_770583, EPI_ISL_770587, EPI_ISL_770623, EPI_ISL_770626, EPI_ISL_770627, EPI_ISL_770629 | Pathogen Genomics Center, National Institute of Infectious Diseases                                                                    | Pathogen Genomics Center, National Institute of Infectious Diseases                                                                    | Felipe Barites, Fernando Rosado Spilki, Alana Witt Hansen, Juliane Daise Fleck, Juliana Schrons, Merlane Demoliner, Ana Karolina Eisen Antunes, Fagner Henrique Heldt, Larissa Hellmann, Bruna Hellmann, Ana Luiza Ziulkoski, Victoria Goes, Karolina Schallenberg, Mathreus Nunes Weber, Paula Rodrigues de Almeida, Alessandra Pavan Lamaca da Silva, Ronaldo da Silva F. Jr., Luiz G P de Almeida, Alexandra L Gebber, Ana Paula de C Guimarães, Ana Tereza R de Vasconcelos |
| EPI_ISL_776750, EPI_ISL_776752                                                                                                                                                                 | Instituto Adolfo Lutz - Central                                                                                                        | Instituto Adolfo Lutz, Interdisciplinary Procedures Center.                                                                            | Claudio Tavares Sacchi, Claudia Regina Gongcalves, Erica Valessa Ramos Gomes, Karoline Rodrigues Campos                                                                                                                                                                                                                                                                                                                                                                         |

|                                                                                                                                                                                |                                                                                                                    |                                                                                                                    |  |  |                                                                                                                                                                                                                                                                                                                                                                                                                                                                                                                                                                                                                                                                                                                                                                                          |
|--------------------------------------------------------------------------------------------------------------------------------------------------------------------------------|--------------------------------------------------------------------------------------------------------------------|--------------------------------------------------------------------------------------------------------------------|--|--|------------------------------------------------------------------------------------------------------------------------------------------------------------------------------------------------------------------------------------------------------------------------------------------------------------------------------------------------------------------------------------------------------------------------------------------------------------------------------------------------------------------------------------------------------------------------------------------------------------------------------------------------------------------------------------------------------------------------------------------------------------------------------------------|
| EPI_ISL_776753, EPI_ISL_776755, EPI_ISL_776758                                                                                                                                 | Instituto Adolfo Lutz - Regional de Manila                                                                         | Instituto Adolfo Lutz, Interdisciplinary Procedures Center, Strategic Laboratory                                   |  |  |                                                                                                                                                                                                                                                                                                                                                                                                                                                                                                                                                                                                                                                                                                                                                                                          |
| EPI_ISL_776757, EPI_ISL_776758                                                                                                                                                 | Instituto Adolfo Lutz - Central                                                                                    | Instituto Adolfo Lutz, Interdisciplinary Procedures Center, Strategic Laboratory                                   |  |  |                                                                                                                                                                                                                                                                                                                                                                                                                                                                                                                                                                                                                                                                                                                                                                                          |
| EPI_ISL_776761                                                                                                                                                                 | Instituto Adolfo Lutz - Regional de Santo Andre                                                                    | Instituto Adolfo Lutz, Interdisciplinary Procedures Center, Strategic Laboratory                                   |  |  |                                                                                                                                                                                                                                                                                                                                                                                                                                                                                                                                                                                                                                                                                                                                                                                          |
| EPI_ISL_776764, EPI_ISL_776765, EPI_ISL_776768                                                                                                                                 | Instituto Adolfo Lutz - Regional de Manila                                                                         | Instituto Adolfo Lutz, Interdisciplinary Procedures Center, Strategic Laboratory                                   |  |  |                                                                                                                                                                                                                                                                                                                                                                                                                                                                                                                                                                                                                                                                                                                                                                                          |
| EPI_ISL_779156, EPI_ISL_779160, EPI_ISL_779161, EPI_ISL_779162, EPI_ISL_779163, EPI_ISL_779165, EPI_ISL_779166, EPI_ISL_779167, EPI_ISL_779168                                 | Laboratório de Microbiologia Molecular - Universidade FEEVALE                                                      | Bioinformatics Laboratory / LNCC                                                                                   |  |  | Felipe Barites, Fernando Rosado Spilki, Alana Witt Hansen, Juliana Daise Fleck, Juliana Schrons, Merlane Demoliner, Ana Carolina Eisen Antunes, Fagner Henrique Heldt, Larissa Mallmann, Bruna Herrmann, Ana Lutz Zulkoski, Victoria Goes, Karoline Schallenberg, Mathreus Nunes Weber, Paula Rodrigues de Almeida, Alessandra Pavan Lameca da Silva, Ronaldo da Silva F. Jr., Lutz G P de Almeida, Alexandra L Gebber, Ana Paula de C Guimarães, Ana Tereza R de Vasconcelos                                                                                                                                                                                                                                                                                                            |
| EPI_ISL_779207, EPI_ISL_779209, EPI_ISL_779210, EPI_ISL_779245, EPI_ISL_779246                                                                                                 | Pathogen Genomics Center, National Institute of Infectious Diseases                                                | Pathogen Genomics Center, National Institute of Infectious Diseases                                                |  |  | Tsuyoshi Seizuka, Kenryo Itohara, Rina Tanaka, Masanori Hashino, Makoto Kuroda                                                                                                                                                                                                                                                                                                                                                                                                                                                                                                                                                                                                                                                                                                           |
| EPI_ISL_779617                                                                                                                                                                 | Victorian Infectious Diseases Reference Laboratory (VDR/L)                                                         | VDR/L and MDU-PHL                                                                                                  |  |  | Gay L., Seemann T., Salt, M.L., Druce J., Sherry, N.L.                                                                                                                                                                                                                                                                                                                                                                                                                                                                                                                                                                                                                                                                                                                                   |
| EPI_ISL_790234                                                                                                                                                                 | Houston Methodist Hospital                                                                                         | Houston Methodist Hospital                                                                                         |  |  | S. Wesley Long, Randall J. Olsen, Paul A. Christensen, David W. Bernard, James J. Davis, Maulik Shukla, Marcus Nguyen, Matthew Opeda Sawwada, Prasanti Venramilli, Layne Priddy, Sisir Subedi, Heather Hendrickson, and James W. Messer                                                                                                                                                                                                                                                                                                                                                                                                                                                                                                                                                  |
| EPI_ISL_792101, EPI_ISL_792102                                                                                                                                                 | Instituto Adolfo Lutz - Central                                                                                    | Instituto Adolfo Lutz, Interdisciplinary Procedures Center, Strategic Laboratory                                   |  |  | Claudio Tavares Sacchi, Claudia Regina Gonçalves, Erica Valessa Ramos Gomes, Karoline Rodrigues Campos                                                                                                                                                                                                                                                                                                                                                                                                                                                                                                                                                                                                                                                                                   |
| EPI_ISL_792103                                                                                                                                                                 | Instituto Adolfo Lutz - Regional de Santo Andre                                                                    | Instituto Adolfo Lutz, Interdisciplinary Procedures Center, Strategic Laboratory                                   |  |  | Claudio Tavares Sacchi, Claudia Regina Gonçalves, Erica Valessa Ramos Gomes, Karoline Rodrigues Campos                                                                                                                                                                                                                                                                                                                                                                                                                                                                                                                                                                                                                                                                                   |
| EPI_ISL_792104, EPI_ISL_792106, EPI_ISL_792107, EPI_ISL_792108, EPI_ISL_792109, EPI_ISL_792110, EPI_ISL_792111, EPI_ISL_792112, EPI_ISL_792113, EPI_ISL_792114                 | Instituto Adolfo Lutz - Central                                                                                    | Instituto Adolfo Lutz, Interdisciplinary Procedures Center, Strategic Laboratory                                   |  |  | Claudio Tavares Sacchi, Claudia Regina Gonçalves, Erica Valessa Ramos Gomes, Karoline Rodrigues Campos                                                                                                                                                                                                                                                                                                                                                                                                                                                                                                                                                                                                                                                                                   |
| EPI_ISL_792115, EPI_ISL_792116                                                                                                                                                 | Instituto Adolfo Lutz - Regional de Taubate                                                                        | Instituto Adolfo Lutz, Interdisciplinary Procedures Center, Strategic Laboratory                                   |  |  | Claudio Tavares Sacchi, Claudia Regina Gonçalves, Erica Valessa Ramos Gomes, Karoline Rodrigues Campos                                                                                                                                                                                                                                                                                                                                                                                                                                                                                                                                                                                                                                                                                   |
| EPI_ISL_792605, EPI_ISL_792631, EPI_ISL_792633                                                                                                                                 | LACEN-PR                                                                                                           | Laboratory of Respiratory Viruses and Measles, Oswaldo Cruz Institute, FIOCRUZ                                     |  |  | Paola Resende, Luciana Appolinario, Fernando Motta, Ana Carolina Paxoa, Ana Carolina Mendonça, João Felipe Bezerra, Romero Henrique Teixeira de Vasconcelos, Dalaine Loulida Floriano Teixeira, Thiago Franco de Oliveira Carneiro, Marilda Siqueira                                                                                                                                                                                                                                                                                                                                                                                                                                                                                                                                     |
| EPI_ISL_792643                                                                                                                                                                 | LACEN-AL                                                                                                           | Laboratory of Respiratory Viruses and Measles, Oswaldo Cruz Institute, FIOCRUZ                                     |  |  | Paola Resende, Luciana Appolinario, Fernando Motta, Ana Carolina Paxoa, Ana Carolina Mendonça, Anderson Brandão Leite, Marilda Siqueira                                                                                                                                                                                                                                                                                                                                                                                                                                                                                                                                                                                                                                                  |
| EPI_ISL_792647, EPI_ISL_792649, EPI_ISL_792653, EPI_ISL_792654                                                                                                                 | LACEN-PR                                                                                                           | Laboratory of Respiratory Viruses and Measles, Oswaldo Cruz Institute, FIOCRUZ                                     |  |  | Paola Resende, Luciana Appolinario, Fernando Motta, Ana Carolina Paxoa, Ana Carolina Mendonça, Ana Carolina Mendonça, Marilda Siqueira                                                                                                                                                                                                                                                                                                                                                                                                                                                                                                                                                                                                                                                   |
| EPI_ISL_798972                                                                                                                                                                 | Lighthouse Lab in Milton Keynes                                                                                    | Wellcome Sanger Institute for the COVID-19 Genomics UK (COG-UK) Consortium                                         |  |  | The Lighthouse Lab in Milton Keynes and Alex Alderton, Roberto Amato, Sonia Gonçalves, Ewan Harrison, David K. Jackson, Ian Johnson, Dominic Kwiatkowski, Cordelia Langford, John Sillitoe on behalf of the Wellcome Sanger Institute COVID-19 Surveillance Team                                                                                                                                                                                                                                                                                                                                                                                                                                                                                                                         |
| EPI_ISL_800134                                                                                                                                                                 | Lighthouse Lab in Alderley Park                                                                                    | Wellcome Sanger Institute for the COVID-19 Genomics UK (COG-UK) Consortium                                         |  |  | Jacquelyn Wynn, Mairead Hyland, The Lighthouse Lab in Alderley Park and Alex Alderton, Roberto Amato, Sonia Gonçalves, Ewan Harrison, David K. Jackson, Ian Johnson, Dominic Kwiatkowski, Cordelia Langford, John Sillitoe on behalf of the Wellcome Sanger Institute COVID-19 Surveillance Team                                                                                                                                                                                                                                                                                                                                                                                                                                                                                         |
| EPI_ISL_801386, EPI_ISL_801387, EPI_ISL_801388, EPI_ISL_801389, EPI_ISL_801390, EPI_ISL_801391, EPI_ISL_801392, EPI_ISL_801393, EPI_ISL_801394, EPI_ISL_801395, EPI_ISL_801396 | Laboratório de Ecologia de Doenças Transmissíveis na Amazonia, Instituto Leonidas e Maria Deane - Fiocruz Amazonia | Laboratório de Ecologia de Doenças Transmissíveis na Amazonia, Instituto Leonidas e Maria Deane - Fiocruz Amazonia |  |  | Valdineie Nascimento, Victor Souza, André Corado, Fernanda Nascimento, George Silva, Agatha Costa, Debora Duarte, Luciana Gonçalves, Maria Julia Brandão, Michele Jesus, Felipe Navera                                                                                                                                                                                                                                                                                                                                                                                                                                                                                                                                                                                                   |
| EPI_ISL_801397, EPI_ISL_801398, EPI_ISL_801399, EPI_ISL_801400, EPI_ISL_801401, EPI_ISL_801402, EPI_ISL_801403                                                                 | Laboratório Central de Saúde Pública do Amazonas - LACEN-AM                                                        | Laboratório de Ecologia de Doenças Transmissíveis na Amazonia, Instituto Leonidas e Maria Deane - Fiocruz Amazonia |  |  | Valdineie Nascimento, Victor Souza, André Corado, Fernanda Nascimento, George Silva, Agatha Costa, Debora Duarte, Luciana Gonçalves, Maria Julia Brandão, Michele Jesus, Felipe Navera                                                                                                                                                                                                                                                                                                                                                                                                                                                                                                                                                                                                   |
| EPI_ISL_802105, EPI_ISL_802106                                                                                                                                                 | MSHS Clinical Microbiology Laboratories                                                                            | MSHS Pathogen Surveillance Program                                                                                 |  |  | Ana S. Gonzalez-Reiche, Hala Alshammery, Mitchell J. Sullivan, Brianne Clerici, Alay Ojha, Angèle Amokoh, Mahmoud Awawda, Elena Hirsch, Ashley S. Salimbanon, Levy Somnitsky, Katherine Beach, Kayla Russo, Charles Gleason, Sherice Fabre, Giulio Kleiner, Zehab Khan, Bierny Abunurque, Adriana van de Gucht, Komal Srivastava, Mathew M. Hernandez, Jayveela Dutta, Denise Jurczyszak, Emily Ferrel, Rachel Cheneil, Nancy Parcoueur, Betsaida Salom Melo, Ima Ousseno, Gintaras Deikus, Juan Seo, Shwetha Hara Sridhar, Ying-Chih Wang, Kathryn Twyman, Andrew Kasarskis, Deena R. Altman, Robert Sabra, Adolfo Garcia-Sastre, Maria Luksza, Gopi Patel, Sarah Schaefer, Melissa Gitman, Michael D. Nowak, Alberto Paniz-Mondolfi, Emilia Mla Sordilo, Viviana Simon, Harm van Bakel |
| EPI_ISL_814619                                                                                                                                                                 | Bioinformatics and Biostatistics Lab, Advanced Sequencing Facility                                                 | COVID-19 Genomics UK (COG-UK) Consortium                                                                           |  |  | Aengus Stewart, Jerome Nicod, Chelsea Sawyer, Laura Cullitt, Harshil Patel, Margaret Crawford                                                                                                                                                                                                                                                                                                                                                                                                                                                                                                                                                                                                                                                                                            |
| EPI_ISL_831645, EPI_ISL_831660, EPI_ISL_831688, EPI_ISL_831689, EPI_ISL_831938, EPI_ISL_832009, EPI_ISL_832011                                                                 | Laboratório de Microbiologia Molecular - Universidade FEEVALE                                                      | Universidade Federal de Ciências da Saúde de Porto Alegre                                                          |  |  | Vinicius Bonetti Franceschi, Amanda de Menezes Mayer, Gabriel Dickinson Caldana, Caia Andreia Moreira Neves, Patricia Alinne Ferrazere, Gabriela Battaglia Cybis, Ricardo Aiel Zimerman, Livia Kretzsch, Fernando Rosado Spilki, Claudia Elizabeth Thompson                                                                                                                                                                                                                                                                                                                                                                                                                                                                                                                              |
| EPI_ISL_833131, EPI_ISL_833132, EPI_ISL_833133, EPI_ISL_833134                                                                                                                 | Laboratório de Ecologia de Doenças Transmissíveis na Amazonia, Instituto Leonidas e Maria Deane - Fiocruz Amazonia | Laboratório de Ecologia de Doenças Transmissíveis na Amazonia, Instituto Leonidas e Maria Deane - Fiocruz Amazonia |  |  | Valdineie Nascimento, Victor Souza, André Corado, Fernanda Nascimento, George Silva, Agatha Costa, Debora Duarte, Karina Pessoa, Matilde Mejia, Luciana Gonçalves, Maria Julia Brandão, Michele Jesus, Felipe Navera                                                                                                                                                                                                                                                                                                                                                                                                                                                                                                                                                                     |
| EPI_ISL_833152, EPI_ISL_833153, EPI_ISL_833154                                                                                                                                 | Instituto Adolfo Lutz - Central                                                                                    | Instituto Adolfo Lutz, Interdisciplinary Procedures Center, Strategic Laboratory                                   |  |  | Claudio Tavares Sacchi, Claudia Regina Gonçalves, Erica Valessa Ramos Gomes, Karoline Rodrigues Campos                                                                                                                                                                                                                                                                                                                                                                                                                                                                                                                                                                                                                                                                                   |
| EPI_ISL_833156                                                                                                                                                                 | Instituto Adolfo Lutz - Regional de Sorocaba                                                                       | Instituto Adolfo Lutz, Interdisciplinary Procedures Center, Strategic Laboratory                                   |  |  | Claudio Tavares Sacchi, Claudia Regina Gonçalves, Erica Valessa Ramos Gomes, Karoline Rodrigues Campos                                                                                                                                                                                                                                                                                                                                                                                                                                                                                                                                                                                                                                                                                   |
| EPI_ISL_833160                                                                                                                                                                 | Instituto Adolfo Lutz - Regional de Santo Andre                                                                    | Instituto Adolfo Lutz, Interdisciplinary Procedures Center, Strategic Laboratory                                   |  |  | Claudio Tavares Sacchi, Claudia Regina Gonçalves, Erica Valessa Ramos Gomes, Karoline Rodrigues Campos                                                                                                                                                                                                                                                                                                                                                                                                                                                                                                                                                                                                                                                                                   |
| EPI_ISL_833182                                                                                                                                                                 | Lab LOC - Itapeceira da Serra                                                                                      | Instituto Adolfo Lutz, Interdisciplinary Procedures Center, Strategic Laboratory                                   |  |  | Claudio Tavares Sacchi, Claudia Regina Gonçalves, Erica Valessa Ramos Gomes, Karoline Rodrigues Campos                                                                                                                                                                                                                                                                                                                                                                                                                                                                                                                                                                                                                                                                                   |



|                                                                                                                                                                                |                                                                                                                                        |                                                                                                                                        |                                                                                                                                                                                                                                                                                                             |
|--------------------------------------------------------------------------------------------------------------------------------------------------------------------------------|----------------------------------------------------------------------------------------------------------------------------------------|----------------------------------------------------------------------------------------------------------------------------------------|-------------------------------------------------------------------------------------------------------------------------------------------------------------------------------------------------------------------------------------------------------------------------------------------------------------|
| EPI_ISL_833165                                                                                                                                                                 | Hospital Samaritano                                                                                                                    | Instituto Adolfo Lutz, Interdisciplinary Procedures Center, Strategic Laboratory                                                       | Claudio Tavares Sacchi, Claudia Regina Gongcalves, Erica Valessa Ramos Gomes, Karoline Rodrigues Campos                                                                                                                                                                                                     |
| EPI_ISL_833168                                                                                                                                                                 | DB Diagnosticos do Brasil                                                                                                              | Instituto Adolfo Lutz, Interdisciplinary Procedures Center, Strategic Laboratory                                                       | Claudio Tavares Sacchi, Claudia Regina Gongcalves, Erica Valessa Ramos Gomes, Karoline Rodrigues Campos                                                                                                                                                                                                     |
| EPI_ISL_834755                                                                                                                                                                 | Lighthouse Lab in Glasgow                                                                                                              | Wellcome Sanger Institute for the COVID-19 Genomics UK (COG-UK) Consortium                                                             | Harper VanSteenhouse, Yuni Kasai, David Gray, Carol Clugston, Anna Dominiczak and Alex Alderton, Roberto Amato, Sonia Goncalves, Ewan Harrison, David K. Jackson, Ian Johnston, Dominic Kwiatkowski, Cordelia Langford, John Sillitoe on behalf of the Wellcome Sanger Institute COVID-19 Surveillance Team |
| EPI_ISL_836765, EPI_ISL_836828                                                                                                                                                 | Lighthouse Lab in Alderley Park                                                                                                        | Wellcome Sanger Institute for the COVID-19 Genomics UK (COG-UK) Consortium                                                             | Jacquelyn Wynn, Mairead Hyland, The Lighthouse Lab in Alderley Park and Alex Alderton, Roberto Amato, Sonia Goncalves, Ewan Harrison, David K. Jackson, Ian Johnston, Dominic Kwiatkowski, Cordelia Langford, John Sillitoe on behalf of the Wellcome Sanger Institute COVID-19 Surveillance Team           |
| EPI_ISL_836978                                                                                                                                                                 | Immandade de Santa Casa de Misericordia de Lorena                                                                                      | Instituto Adolfo Lutz, Interdisciplinary Procedures Center, Strategic Laboratory                                                       | Claudio Tavares Sacchi, Claudia Regina Gongcalves, Erica Valessa Ramos Gomes, Karoline Rodrigues Campos                                                                                                                                                                                                     |
| EPI_ISL_848611, EPI_ISL_848615, EPI_ISL_848617, EPI_ISL_848618, EPI_ISL_848619, EPI_ISL_848620, EPI_ISL_848621, EPI_ISL_848622, EPI_ISL_848623, EPI_ISL_848624, EPI_ISL_848628 | see above                                                                                                                              | Erando Chagas Institute                                                                                                                | Santos, M.C.; Silva, A.M.; Junior, W.D.C.; Barbagalata, L.S.; Ferreira, J.A.; Sousa, E.M.A.; da Silva, P.S.; Pinheiro, K.C.; L.C.; Sousa Junior, E.C.                                                                                                                                                       |
| EPI_ISL_850198                                                                                                                                                                 | Division of Emerging Infectious Diseases, Bureau of Infectious Diseases Diagnosis Control, Korea Disease Control and Prevention Agency | Division of Emerging Infectious Diseases, Bureau of Infectious Diseases Diagnosis Control, Korea Disease Control and Prevention Agency | Ae Kyung Park, Il-Hwan Kim, Heui Man Kim, Jeong-Min Kim, Namjo Lee, Chaeyoung Lee, Sang Hee Woo, Eun-Jim Kim                                                                                                                                                                                                |
| EPI_ISL_857239                                                                                                                                                                 | DOHMH Corona                                                                                                                           | New York City Public Health Laboratory                                                                                                 | Jade Wang, et al.                                                                                                                                                                                                                                                                                           |
| EPI_ISL_857679                                                                                                                                                                 | Lighthouse Lab in Cambridge                                                                                                            | Wellcome Sanger Institute for the COVID-19 Genomics UK (COG-UK) Consortium                                                             | Rob Howes, The Lighthouse Lab in Cambridge and Alex Alderton, Roberto Amato, Sonia Goncalves, Ewan Harrison, David K. Jackson, Ian Johnston, Dominic Kwiatkowski, Cordelia Langford, John Sillitoe on behalf of the Wellcome Sanger Institute COVID-19 Surveillance Team                                    |
| EPI_ISL_860113                                                                                                                                                                 | Pathogen Genomics Center, National Institute of Infectious Diseases                                                                    | Pathogen Genomics Center, National Institute of Infectious Diseases                                                                    | Tsuyoshi Sekizuka, Kenitaro Hokawa, Rina Taraka, Masanori Hashino, Makoto Kuroda                                                                                                                                                                                                                            |
| EPI_ISL_860285, EPI_ISL_860287                                                                                                                                                 | Department of Medical Microbiology, St. Olavs Hospital                                                                                 | Norwegian Institute of Public Health, Department of Virology                                                                           | Kathrine Stone-Johansen, Kamilla Heddeland Inseiljord, Hilde Eisthaug, Alva R AllMarie Paulsen Madsen, Raamus Rlis Koppaerd, Hilde Volian, Karoline                                                                                                                                                         |
| EPI_ISL_861625, EPI_ISL_861626, EPI_ISL_861627                                                                                                                                 | Instituto Adolfo Lutz - Central                                                                                                        | Instituto Adolfo Lutz, Interdisciplinary Procedures Center, Strategic Laboratory                                                       | Claudio Tavares Sacchi, Claudia Regina Gongcalves, Erica Valessa Ramos Gomes, Karoline Rodrigues Campos                                                                                                                                                                                                     |
| EPI_ISL_861628                                                                                                                                                                 | Laboratorio Municipal de Guarulhos                                                                                                     | Instituto Adolfo Lutz, Interdisciplinary Procedures Center, Strategic Laboratory                                                       | Claudio Tavares Sacchi, Claudia Regina Gongcalves, Erica Valessa Ramos Gomes, Karoline Rodrigues Campos                                                                                                                                                                                                     |
| EPI_ISL_861630, EPI_ISL_861631, EPI_ISL_861632, EPI_ISL_861633, EPI_ISL_861634                                                                                                 | Instituto Adolfo Lutz - Central                                                                                                        | Instituto Adolfo Lutz, Interdisciplinary Procedures Center, Strategic Laboratory                                                       | Claudio Tavares Sacchi, Claudia Regina Gongcalves, Erica Valessa Ramos Gomes, Karoline Rodrigues Campos                                                                                                                                                                                                     |
| EPI_ISL_861636                                                                                                                                                                 | Hospital Geral de Sao Mateus Sao Paulo                                                                                                 | Instituto Adolfo Lutz, Interdisciplinary Procedures Center, Strategic Laboratory                                                       | Claudio Tavares Sacchi, Claudia Regina Gongcalves, Erica Valessa Ramos Gomes, Karoline Rodrigues Campos                                                                                                                                                                                                     |
| EPI_ISL_861637                                                                                                                                                                 | Hospital Nipo Brasileiro                                                                                                               | Instituto Adolfo Lutz, Interdisciplinary Procedures Center, Strategic Laboratory                                                       | Claudio Tavares Sacchi, Claudia Regina Gongcalves, Erica Valessa Ramos Gomes, Karoline Rodrigues Campos                                                                                                                                                                                                     |
| EPI_ISL_861639                                                                                                                                                                 | Hospital Sao Paulo de Espirito da Unifesp                                                                                              | Instituto Adolfo Lutz, Interdisciplinary Procedures Center, Strategic Laboratory                                                       | Claudio Tavares Sacchi, Claudia Regina Gongcalves, Erica Valessa Ramos Gomes, Karoline Rodrigues Campos                                                                                                                                                                                                     |
| EPI_ISL_861640, EPI_ISL_861641                                                                                                                                                 | Hospital Municipal Dr. Moyses Deusch                                                                                                   | Instituto Adolfo Lutz, Interdisciplinary Procedures Center, Strategic Laboratory                                                       | Claudio Tavares Sacchi, Claudia Regina Gongcalves, Erica Valessa Ramos Gomes, Karoline Rodrigues Campos                                                                                                                                                                                                     |
| EPI_ISL_861643                                                                                                                                                                 | Instituto Adolfo Lutz - Central                                                                                                        | Instituto Adolfo Lutz, Interdisciplinary Procedures Center, Strategic Laboratory                                                       | Claudio Tavares Sacchi, Claudia Regina Gongcalves, Erica Valessa Ramos Gomes, Karoline Rodrigues Campos                                                                                                                                                                                                     |
| EPI_ISL_861644                                                                                                                                                                 | Hospital Santa Virginia                                                                                                                | Instituto Adolfo Lutz, Interdisciplinary Procedures Center, Strategic Laboratory                                                       | Claudio Tavares Sacchi, Claudia Regina Gongcalves, Erica Valessa Ramos Gomes, Karoline Rodrigues Campos                                                                                                                                                                                                     |
| EPI_ISL_861645                                                                                                                                                                 | Hospital e Pronto Socorro Comunitario Vila Iolanda                                                                                     | Instituto Adolfo Lutz, Interdisciplinary Procedures Center, Strategic Laboratory                                                       | Claudio Tavares Sacchi, Claudia Regina Gongcalves, Erica Valessa Ramos Gomes, Karoline Rodrigues Campos                                                                                                                                                                                                     |
| EPI_ISL_861646, EPI_ISL_861647                                                                                                                                                 | Hospital Santa Marcelina Sao Paulo                                                                                                     | Instituto Adolfo Lutz, Interdisciplinary Procedures Center, Strategic Laboratory                                                       | Claudio Tavares Sacchi, Claudia Regina Gongcalves, Erica Valessa Ramos Gomes, Karoline Rodrigues Campos                                                                                                                                                                                                     |
| EPI_ISL_861648                                                                                                                                                                 | Hospital e Pronto Socorro Portinari                                                                                                    | Instituto Adolfo Lutz, Interdisciplinary Procedures Center, Strategic Laboratory                                                       | Claudio Tavares Sacchi, Claudia Regina Gongcalves, Erica Valessa Ramos Gomes, Karoline Rodrigues Campos                                                                                                                                                                                                     |
| EPI_ISL_861649                                                                                                                                                                 | Hospital Renascença Campinas                                                                                                           | Instituto Adolfo Lutz, Interdisciplinary Procedures Center, Strategic Laboratory                                                       | Claudio Tavares Sacchi, Claudia Regina Gongcalves, Erica Valessa Ramos Gomes, Karoline Rodrigues Campos                                                                                                                                                                                                     |
| EPI_ISL_861650                                                                                                                                                                 | Hospital Santa Marcelina Sao Paulo                                                                                                     | Instituto Adolfo Lutz, Interdisciplinary Procedures Center, Strategic Laboratory                                                       | Claudio Tavares Sacchi, Claudia Regina Gongcalves, Erica Valessa Ramos Gomes, Karoline Rodrigues Campos                                                                                                                                                                                                     |
| EPI_ISL_861652                                                                                                                                                                 | AMA Warberio Dias da Costa                                                                                                             | Instituto Adolfo Lutz, Interdisciplinary Procedures Center, Strategic Laboratory                                                       | Claudio Tavares Sacchi, Claudia Regina Gongcalves, Erica Valessa Ramos Gomes, Karoline Rodrigues Campos                                                                                                                                                                                                     |
| EPI_ISL_861654                                                                                                                                                                 | Hospital Santa Marcelina Sao Paulo                                                                                                     | Instituto Adolfo Lutz, Interdisciplinary Procedures Center, Strategic Laboratory                                                       | Claudio Tavares Sacchi, Claudia Regina Gongcalves, Erica Valessa Ramos Gomes, Karoline Rodrigues Campos                                                                                                                                                                                                     |
| EPI_ISL_861656                                                                                                                                                                 | UPA de Jaridira                                                                                                                        | Instituto Adolfo Lutz, Interdisciplinary Procedures Center, Strategic Laboratory                                                       | Claudio Tavares Sacchi, Claudia Regina Gongcalves, Erica Valessa Ramos Gomes, Karoline Rodrigues Campos                                                                                                                                                                                                     |
| EPI_ISL_861658                                                                                                                                                                 | Hospital Municipal Antonio Giglio                                                                                                      | Instituto Adolfo Lutz, Interdisciplinary Procedures Center, Strategic Laboratory                                                       | Claudio Tavares Sacchi, Claudia Regina Gongcalves, Erica Valessa Ramos Gomes, Karoline Rodrigues Campos                                                                                                                                                                                                     |
| EPI_ISL_861660, EPI_ISL_861661                                                                                                                                                 | PS e Maternidade Nair Fonseca Leiteo Arantes                                                                                           | Instituto Adolfo Lutz, Interdisciplinary Procedures Center, Strategic Laboratory                                                       | Claudio Tavares Sacchi, Claudia Regina Gongcalves, Erica Valessa Ramos Gomes, Karoline Rodrigues Campos                                                                                                                                                                                                     |
| EPI_ISL_861663                                                                                                                                                                 | Instituto Adolfo Lutz - Central                                                                                                        | Instituto Adolfo Lutz, Interdisciplinary Procedures Center, Strategic Laboratory                                                       | Claudio Tavares Sacchi, Claudia Regina Gongcalves, Erica Valessa Ramos Gomes, Karoline Rodrigues Campos                                                                                                                                                                                                     |
| EPI_ISL_861665                                                                                                                                                                 | Instituto Adolfo Lutz - Regional de Taubate                                                                                            | Instituto Adolfo Lutz, Interdisciplinary Procedures Center, Strategic Laboratory                                                       | Claudio Tavares Sacchi, Claudia Regina Gongcalves, Erica Valessa Ramos Gomes, Karoline Rodrigues Campos                                                                                                                                                                                                     |
| EPI_ISL_861666                                                                                                                                                                 | PSF Dr. Antonio Prass de Almeida                                                                                                       | Instituto Adolfo Lutz, Interdisciplinary Procedures Center, Strategic Laboratory                                                       | Claudio Tavares Sacchi, Claudia Regina Gongcalves, Erica Valessa Ramos Gomes, Karoline Rodrigues Campos                                                                                                                                                                                                     |
| EPI_ISL_861667                                                                                                                                                                 | Instituto Adolfo Lutz - Regional de Rio Claro                                                                                          | Instituto Adolfo Lutz, Interdisciplinary Procedures Center, Strategic Laboratory                                                       | Claudio Tavares Sacchi, Claudia Regina Gongcalves, Erica Valessa Ramos Gomes, Karoline Rodrigues Campos                                                                                                                                                                                                     |

|                                                                                                                                                                                |                                                                                                                                |                                                                                                                                                                      |                                                                                                                                                                                                                                                                                                                                                                                                    |
|--------------------------------------------------------------------------------------------------------------------------------------------------------------------------------|--------------------------------------------------------------------------------------------------------------------------------|----------------------------------------------------------------------------------------------------------------------------------------------------------------------|----------------------------------------------------------------------------------------------------------------------------------------------------------------------------------------------------------------------------------------------------------------------------------------------------------------------------------------------------------------------------------------------------|
| EPI_ISL_861671                                                                                                                                                                 | Hospital Municipal Prefeito Waldemar Costa Filho                                                                               | Instituto Adolfo Lutz, Interdisciplinary Procedures Center, Strategic Laboratory                                                                                     | Claudio Tavares Sacchi, Claudia Regina Gonçalves, Erica Valessa Ramos Gomes, Karoline Rodrigues Campos                                                                                                                                                                                                                                                                                             |
| EPI_ISL_861672                                                                                                                                                                 | Day Hospital de Ermelino Matarazzo                                                                                             | Instituto Adolfo Lutz, Interdisciplinary Procedures Center, Strategic Laboratory                                                                                     | Claudio Tavares Sacchi, Claudia Regina Gonçalves, Erica Valessa Ramos Gomes, Karoline Rodrigues Campos                                                                                                                                                                                                                                                                                             |
| see above                                                                                                                                                                      |                                                                                                                                |                                                                                                                                                                      |                                                                                                                                                                                                                                                                                                                                                                                                    |
| EPI_ISL_861914                                                                                                                                                                 | LATE - Laboratório de Técnicas Especiais - Hospital Israelita Albert Einstein<br>Genomika Einstein                             | LATE - Laboratório de Técnicas Especiais - Hospital Israelita Albert Einstein                                                                                        | Dayvid Angaritan, Fernanda de Melo Malta, Raquel Riyuzo, Ana Paula Moreira Sales, Pedro Henrique Sebe Rodrigues, João Renato Rebelo Pinho                                                                                                                                                                                                                                                          |
| EPI_ISL_875048                                                                                                                                                                 | Lighthouse Lab in Milton Keynes<br>Instituto de Biotecnologia - UNESP-Botucatu-SP                                              | Welcome Sanger Institute for the COVID-19 Genomics UK (COG-UK) Consortium<br>Instituto de Biotecnologia - UNESP-Botucatu-SP                                          | The Lighthouse Lab in Milton Keynes and Alex Aldeiro, Roberto Amato, Sonia Gonçalves, Ewan Harrison, David K. Jackson, Ian Johnston, Dominic Kwiatkowski, Cordelia Langford, John Sillitoe on behalf of the Welcome Sanger Institute COVID-19 Surveillance Team<br>Leila Sabina Ulmann; Fábio Sossai Posselton, Camilla Dantas Malossi, Paula Rahal, Paulo Inacio da Costa, João Pessoa Araújo Jr. |
| EPI_ISL_875540, EPI_ISL_875541, EPI_ISL_875542, EPI_ISL_875543, EPI_ISL_875544, EPI_ISL_875545, EPI_ISL_875546, EPI_ISL_875547, EPI_ISL_875548, EPI_ISL_875549, EPI_ISL_875550 | UCO Igiene e Sanità Pubblica, ASUIGI, Trieste, Italy:<br>Laboratorio di Virologia Molecolare, ICGEB, Trieste, Italy            | Laboratorio di Genomica ed Epigenomica sistema Argo, Area Sciencepark, Trieste, Italy:                                                                               | Pierluirano D'Agaro, Danilo Licastro, Alessandro Marcello                                                                                                                                                                                                                                                                                                                                          |
| EPI_ISL_882658                                                                                                                                                                 | Secretaria Municipal de Saude<br>Centro de Triagem Covid19                                                                     | Instituto Adolfo Lutz, Interdisciplinary Procedures Center, Strategic Laboratory<br>Instituto Adolfo Lutz, Interdisciplinary Procedures Center, Strategic Laboratory | Claudio Tavares Sacchi, Claudia Regina Gonçalves, Erica Valessa Ramos Gomes, Karoline Rodrigues Campos<br>Claudio Tavares Sacchi, Claudia Regina Gonçalves, Erica Valessa Ramos Gomes, Karoline Rodrigues Campos                                                                                                                                                                                   |
| EPI_ISL_882659                                                                                                                                                                 | Hospital de Santa Barbara de Goias                                                                                             | Instituto Adolfo Lutz, Interdisciplinary Procedures Center, Strategic Laboratory                                                                                     | Claudio Tavares Sacchi, Claudia Regina Gonçalves, Erica Valessa Ramos Gomes, Karoline Rodrigues Campos                                                                                                                                                                                                                                                                                             |
| EPI_ISL_888671, EPI_ISL_888672                                                                                                                                                 | Instituto de Biotecnologia - UNESP-Botucatu-SP<br>KU Leuven, Rega Institute, Clinical and Epidemiological Virology             | Instituto de Biotecnologia - UNESP-Botucatu-SP<br>KU Leuven, Rega Institute, Clinical and Epidemiological Virology                                                   | Leila Sabina Ulmann; Fábio Sossai Posselton, Camilla Dantas Malossi, Paula Rahal, Paulo Inacio da Costa, João Pessoa Araújo Jr.<br>Tony Wawina-Bokelanga, Bert Varmmechelen, Joan Martí-Carerras, Piet Wases                                                                                                                                                                                       |
| EPI_ISL_890322                                                                                                                                                                 | New York Presbyterian Hospital                                                                                                 | Wadsworth Center, New York State Department of Health                                                                                                                | Krisen St. George, Daryl M. Lamson, Alexis Rusevi, Matthew Shurt, Melissa Al. Leisner, Jonathan Pihlchik, Navid Singh, John Kelly, Erasmus Schneider, Erica Lesek-Nesselquist                                                                                                                                                                                                                      |
| EPI_ISL_896351                                                                                                                                                                 | Pathogen Genomics Center, National Institute of Infectious Diseases                                                            | Pathogen Genomics Center, National Institute of Infectious Diseases                                                                                                  | Tsuyoshi Sekizuka, Kenaro Tokawa, Rima Tanaka, Masanori Hashino, Makoto Kuroda                                                                                                                                                                                                                                                                                                                     |
| EPI_ISL_901893, EPI_ISL_901894                                                                                                                                                 | Hospital Nipo Brasileiro                                                                                                       | Instituto Adolfo Lutz, Interdisciplinary Procedures Center, Strategic Laboratory                                                                                     | Claudio Tavares Sacchi, Claudia Regina Gonçalves, Erica Valessa Ramos Gomes, Karoline Rodrigues Campos                                                                                                                                                                                                                                                                                             |
| EPI_ISL_906066                                                                                                                                                                 | PS e Maternidade Nair Fonseca Leilao Arames                                                                                    | Instituto Adolfo Lutz, Interdisciplinary Procedures Center, Strategic Laboratory                                                                                     | Claudio Tavares Sacchi, Claudia Regina Gonçalves, Erica Valessa Ramos Gomes, Karoline Rodrigues Campos                                                                                                                                                                                                                                                                                             |
| EPI_ISL_906067                                                                                                                                                                 | LACEN - Laboratório Central de Saude Publica do Para<br>Evandro Chagas Institute                                               | Evandro Chagas Institute<br>Evandro Chagas Institute                                                                                                                 | Santos, M.C.; Silva, A.M.; Junior, W.D.C.; Barbogalata, L.S.; Ferreira, J.A.; Sousa, E.M.A.; da Silva, P.S.; Pinheiro, K.C.; L.C.; Sousa Junior, E.C.<br>Santos, M.C.; Silva, A.M.; Junior, W.D.C.; Barbogalata, L.S.; Ferreira, J.A.; Sousa, E.M.A.; da Silva, P.S.; Pinheiro, K.C.; L.C.; Sousa Junior, E.C.                                                                                     |
| EPI_ISL_918515                                                                                                                                                                 | LACEN - Laboratório Central de Saude Publica do Amazonas                                                                       | Evandro Chagas Institute                                                                                                                                             | Santos, M.C.; Silva, A.M.; Junior, W.D.C.; Barbogalata, L.S.; Ferreira, J.A.; Sousa, E.M.A.; da Silva, P.S.; Pinheiro, K.C.; L.C.; Sousa Junior, E.C.                                                                                                                                                                                                                                              |
| EPI_ISL_918518                                                                                                                                                                 | Regional Virus Laboratory, Belkiss Health and Social Care Trust                                                                | COVID-19 Genomics UK (COG-UK) Consortium                                                                                                                             | Conall McCaughey, James McKenna, Tanya Feeney, Alison Wait, Ciara Cox, Mairead Connor, Zolhan Molnar, David Simpson, Derek Fairley                                                                                                                                                                                                                                                                 |
| EPI_ISL_918531, EPI_ISL_918532, EPI_ISL_918533, EPI_ISL_918534                                                                                                                 | LACEN - Laboratório Central de Saude Publica do Amazonas                                                                       | Evandro Chagas Institute Virology<br>State Center for Health Surveillance of the Health Department of the State of Rio Grande do Sul(CEVS_SSS-RS)                    | Santos, M.C.; Silva, A.M.; Junior, W.D.C.; Barbogalata, L.S.; Ferreira, J.A.; Sousa, E.M.A.; da Silva, P.S.; Pinheiro, K.C.; L.C.; Sousa Junior, E.C.<br>Barcellos R, Campos A, Dornelles C, Godinho F, Gonzales A, Gregianni T, Molina C, Savaio R, Sauraubh A                                                                                                                                    |
| EPI_ISL_920984                                                                                                                                                                 | LACEN - Laboratório Central de Saude Publica do Amazonas                                                                       | Instituto Adolfo Lutz, Interdisciplinary Procedures Center, Strategic Laboratory                                                                                     | Claudio Tavares Sacchi, Claudia Regina Gonçalves, Erica Valessa Ramos Gomes, Karoline Rodrigues Campos                                                                                                                                                                                                                                                                                             |
| EPI_ISL_925916, EPI_ISL_926446                                                                                                                                                 | LACEN - Laboratório Central de Saude Publica do Amazonas<br>Central Laboratory of Public Health of Rio Grande do Sul(Lacem_RS) | Evandro Chagas Institute Virology<br>State Center for Health Surveillance of the Health Department of the State of Rio Grande do Sul(CEVS_SSS-RS)                    | Santos, M.C.; Silva, A.M.; Junior, W.D.C.; Barbogalata, L.S.; Ferreira, J.A.; Sousa, E.M.A.; da Silva, P.S.; Pinheiro, K.C.; L.C.; Sousa Junior, E.C.<br>Barcellos R, Campos A, Dornelles C, Godinho F, Gonzales A, Gregianni T, Molina C, Savaio R, Sauraubh A                                                                                                                                    |
| EPI_ISL_930856, EPI_ISL_930857                                                                                                                                                 | LACEN - Laboratório Central de Saude Publica do Amazonas                                                                       | Instituto Adolfo Lutz, Interdisciplinary Procedures Center, Strategic Laboratory                                                                                     | Claudio Tavares Sacchi, Claudia Regina Gonçalves, Erica Valessa Ramos Gomes, Karoline Rodrigues Campos                                                                                                                                                                                                                                                                                             |
| EPI_ISL_940608                                                                                                                                                                 | Centers for Disease Control and Prevention, Dengue Branch                                                                      | Centers for Disease Control and Prevention, Dengue Branch                                                                                                            | Gilberto A, Santiago, Glenda Gonzalez, Betzabel Flores, Keyla Charriez, Gabriela Paz-Bailey, Jorge L, Munoz-Jordan                                                                                                                                                                                                                                                                                 |
| EPI_ISL_940924                                                                                                                                                                 | Instituto Nacional de Saude (INSA)                                                                                             | Instituto Nacional de Saude (INSA)                                                                                                                                   | Borges et al                                                                                                                                                                                                                                                                                                                                                                                       |
| EPI_ISL_941550, EPI_ISL_941552                                                                                                                                                 | Instituto Nacional de Saude (INSA) and Instituto Gulbenkian de Ciencia (IGC)                                                   | Instituto Nacional de Saude (INSA) and Instituto Gulbenkian de Ciencia (IGC)                                                                                         | Borges et al                                                                                                                                                                                                                                                                                                                                                                                       |
| EPI_ISL_941896                                                                                                                                                                 | LACEN_RS                                                                                                                       | CEVS_SSS_RS                                                                                                                                                          | Borges et al                                                                                                                                                                                                                                                                                                                                                                                       |
| EPI_ISL_942898                                                                                                                                                                 | Lacem_RS                                                                                                                       | State Center for Health Surveillance, Rio Grande do Sul State Secretary of Health                                                                                    | Barcellos R, Campos A, Crescente L, Da Silva A, Dornelles C, Fonseca V, Garay L, Godinho F, Gonzales A, Gregianni T, Molina C, Savaio R, Sauraubh A                                                                                                                                                                                                                                                |
| EPI_ISL_943581, EPI_ISL_943584, EPI_ISL_943609                                                                                                                                 | LACEN do Estado de Tocantins                                                                                                   | Instituto Adolfo Lutz, Interdisciplinary Procedures Center, Strategic Laboratory                                                                                     | Aline Campos, Amanda da Silva, Aneilise Schaurich, Claudia Dornelles, Cyrrilla Molina, Fernanda Godinho, Lara Cresceme, Letícia Gary, Regina Barcellos, Richard Savaio, Tatiana Gregianni, Vagner Fonseca                                                                                                                                                                                          |
| EPI_ISL_943974, EPI_ISL_943975, EPI_ISL_943976, EPI_ISL_943977, EPI_ISL_943978, EPI_ISL_943979, EPI_ISL_943981, EPI_ISL_943983, EPI_ISL_943985                                 | LACEN do Estado de Goias                                                                                                       | Instituto Adolfo Lutz, Interdisciplinary Procedures Center, Strategic Laboratory                                                                                     | Claudio Tavares Sacchi, Claudia Regina Gonçalves, Erica Valessa Ramos Gomes, Karoline Rodrigues Campos                                                                                                                                                                                                                                                                                             |
| EPI_ISL_943988                                                                                                                                                                 | LACEN do Estado de Tocantins                                                                                                   | Instituto Adolfo Lutz, Interdisciplinary Procedures Center, Strategic Laboratory                                                                                     | Claudio Tavares Sacchi, Claudia Regina Gonçalves, Erica Valessa Ramos Gomes, Karoline Rodrigues Campos                                                                                                                                                                                                                                                                                             |
| EPI_ISL_943991                                                                                                                                                                 | LACEN do Estado de Tocantins                                                                                                   | Instituto Adolfo Lutz, Interdisciplinary Procedures Center, Strategic Laboratory                                                                                     | Claudio Tavares Sacchi, Claudia Regina Gonçalves, Erica Valessa Ramos Gomes, Karoline Rodrigues Campos                                                                                                                                                                                                                                                                                             |
| EPI_ISL_951192                                                                                                                                                                 | Instituto Nacional de Medicina Genomica                                                                                        | Instituto Nacional de Medicina Genomica                                                                                                                              | Hidalgo-Miranda A, Mendoza-Vargas A, Reyes-Grateda uP, Cisneros-Villanueva M, Cedro-Tanda A, Penaloza-Figueroa F, Herrera-Montalvo LA                                                                                                                                                                                                                                                              |
| EPI_ISL_960776                                                                                                                                                                 | Broad Institute Clinical Research Sequencing Platform                                                                          | Infectious Disease Program, Broad Institute of Harvard and MIT                                                                                                       | João Costa, João Sobral, Maria Costa, Susana Ladeira, Cathy Paulino, Ricardo Leite                                                                                                                                                                                                                                                                                                                 |
| EPI_ISL_976990, EPI_ISL_976998                                                                                                                                                 | Instituto Adolfo Lutz - Regional de Presidente Prudente                                                                        | Instituto Adolfo Lutz, Interdisciplinary Procedures Center, Strategic Laboratory                                                                                     | Lemieux, J.E., Siddle, K.J., Adams, G., Gladden, Young, A., Lagerborg, K., Rudy, M., DeHuff, K., Carter, A., Norman, E., Bauer, M., Reilly, S., Tomkins-Tinch, C., Lorch, C., Chaluvadi, S., Biren, B. W., Gallagher, G., Smole, S., Park, D. J., Madhans, B. L., and Sebelf, P. C.                                                                                                                |
| EPI_ISL_977471                                                                                                                                                                 | Instituto Adolfo Lutz - Regional de Presidente Prudente                                                                        | Instituto Adolfo Lutz, Interdisciplinary Procedures Center, Strategic Laboratory                                                                                     | Claudio Tavares Sacchi, Claudia Regina Gonçalves, Erica Valessa Ramos Gomes, Karoline Rodrigues Campos                                                                                                                                                                                                                                                                                             |

|                                                   |                                                         |                                                                                     |                                                                                                        |
|---------------------------------------------------|---------------------------------------------------------|-------------------------------------------------------------------------------------|--------------------------------------------------------------------------------------------------------|
| EP1_ISL_977472, EP1_ISL_977473,<br>EP1_ISL_977474 | Instituto Adolfo Lutz Central                           | Instituto Adolfo Lutz, Interdisciplinary Procedures Center,<br>Strategic Laboratory | Claudio Tavares Sacchi, Claudia Regina Gonçalves, Erica Valessa Ramos Gomes, Karoline Rodrigues Campos |
| EP1_ISL_977475                                    | Instituto Adolfo Lutz - Regional de Presidente Prudente | Instituto Adolfo Lutz, Interdisciplinary Procedures Center,<br>Strategic Laboratory | Claudio Tavares Sacchi, Claudia Regina Gonçalves, Erica Valessa Ramos Gomes, Karoline Rodrigues Campos |
| EP1_ISL_977476                                    | Instituto Adolfo Lutz Central                           | Instituto Adolfo Lutz, Interdisciplinary Procedures Center,<br>Strategic Laboratory | Claudio Tavares Sacchi, Claudia Regina Gonçalves, Erica Valessa Ramos Gomes, Karoline Rodrigues Campos |
| EP1_ISL_977478, EP1_ISL_977480,<br>EP1_ISL_977481 | Instituto Adolfo Lutz - Regional de Presidente Prudente | Instituto Adolfo Lutz, Interdisciplinary Procedures Center,<br>Strategic Laboratory | Claudio Tavares Sacchi, Claudia Regina Gonçalves, Erica Valessa Ramos Gomes, Karoline Rodrigues Campos |
| EP1_ISL_977483, EP1_ISL_977484                    | Instituto Adolfo Lutz Central                           | Instituto Adolfo Lutz, Interdisciplinary Procedures Center,<br>Strategic Laboratory | Claudio Tavares Sacchi, Claudia Regina Gonçalves, Erica Valessa Ramos Gomes, Karoline Rodrigues Campos |
| EP1_ISL_977485, EP1_ISL_977488                    | Instituto Adolfo Lutz - Regional de Presidente Prudente | Instituto Adolfo Lutz, Interdisciplinary Procedures Center,<br>Strategic Laboratory | Claudio Tavares Sacchi, Claudia Regina Gonçalves, Erica Valessa Ramos Gomes, Karoline Rodrigues Campos |

We gratefully acknowledge the following Authors from the Originating laboratories responsible for obtaining the specimens, as well as the Submitting laboratories where the genome data were generated and shared via GISAID, on which this research is based.

All Submitters of data may be contacted directly via [www.gisaid.org](http://www.gisaid.org)

Authors are sorted alphabetically.

| Accession ID   | Originating Laboratory                            | Submitting Laboratory                                                            | Authors                                                                                                                                                                                                                                                                           |
|----------------|---------------------------------------------------|----------------------------------------------------------------------------------|-----------------------------------------------------------------------------------------------------------------------------------------------------------------------------------------------------------------------------------------------------------------------------------|
| EPI_ISL_414014 | Hospital Israelita Albert Einstein                | Instituto Adolfo Lutz, Interdisciplinary Procedures Center, Strategic Laboratory | Claudio Tavares Sacchi, Claudia Regina Gonçalves, Kalia Correia dos Santos, Carlos Henrique Camargo, Maria do Carmo Sampaio Tavares Timenetsky, Terezinha Maria de Paiva, Ester Cerdiera Sabino                                                                                   |
| EPI_ISL_414017 | Hospital São Joaquim Beneficência Portuguesa      | Instituto Adolfo Lutz, Interdisciplinary Procedures Center, Strategic Laboratory | Claudio Tavares Sacchi, Claudia Regina Gonçalves, Fabiana Cristina Pereira dos Santos, Carlos Henrique Camargo, Maria do Carmo Sampaio Tavares Timenetsky, Daniela Bernardes Borges da Silva, Terezinha Maria de Paiva, Ester Cerdiera Sabino                                     |
| EPI_ISL_416028 | National Influenza Center - Instituto Adolfo Lutz | Instituto Adolfo Lutz, Interdisciplinary Procedures Center, Strategic Laboratory | Claudio Tavares Sacchi, Claudia Regina Gonçalves, Carlos Henrique Camargo, Fabiana Cristina Pereira dos Santos, Daniela Bernardes Borges da Silva, Simone Guadagnucci Morillo, Adriano Abdud, Adriana Blugno, Maria do Carmo Sampaio Tavares Timenetsky, Terezinha Maria de Paiva |

We gratefully acknowledge the following Authors from the Originating laboratories responsible for obtaining the specimens, as well as the Submitting laboratories where the genome data were generated and shared via GISAID, on which this research is based.

All Submitters of data may be contacted directly via [www.gisaid.org](http://www.gisaid.org)

Authors are sorted alphabetically.

| Accession ID                                                                                                                                                                                                   | Originating Laboratory                                                                     | Submitting Laboratory                                                                                      | Authors                                                                                                                                                                                                                                                                                                                                   |
|----------------------------------------------------------------------------------------------------------------------------------------------------------------------------------------------------------------|--------------------------------------------------------------------------------------------|------------------------------------------------------------------------------------------------------------|-------------------------------------------------------------------------------------------------------------------------------------------------------------------------------------------------------------------------------------------------------------------------------------------------------------------------------------------|
| EPI_ISL_872191, EPI_ISL_872192                                                                                                                                                                                 | Conjunto Hospital do Mandaguai de Sao Paulo                                                | Instituto Adolfo Lutz, Interdisciplinary Procedures Center, Strategic Laboratory                           | Claudio Tavares Sacchi, Claudia Regina Gongcalves, Erica Valessa Ramos Gomes, Karoline Rodrigues Campos, Kalia Correa de Oliveira Santos, Ana Lucia de Carvalho Avelino, Fabiana Cristina Pereira dos Santos                                                                                                                              |
| EPI_ISL_873257                                                                                                                                                                                                 | M Health Fairview                                                                          | Minnesota Department of Health, Public Health Laboratory                                                   | Alexandra Lorenz, Jacob Garfin, Matt Plumb, and Xiong Wang                                                                                                                                                                                                                                                                                |
| EPI_ISL_875566, EPI_ISL_875567, EPI_ISL_875568                                                                                                                                                                 | SIESP LAQUILA                                                                              | Istituto Zoonofilatico Sperimentale dell'Abruzzo e Molise "G. Caporale"                                    | Lorusso A, Marasci M, Di Domenico M, Ancora M, Curri V, Mangone I, Finaidi A, Scialabba S, Di Pasquale A, Gamma C, Puglia I, Calisti P, Savini G                                                                                                                                                                                          |
| EPI_ISL_875688                                                                                                                                                                                                 | National Influenza Center - Instituto Adolfo Lutz                                          | Instituto Adolfo Lutz, Interdisciplinary Procedures Center, Strategic Laboratory                           | Claudio Tavares Sacchi, Claudia Regina Gongcalves, Erica Valessa Ramos Gomes, Karoline Rodrigues Campos, Kalia Correa de Oliveira Santos, Ana Lucia de Carvalho Avelino, Clovis Roberto Abe Constantino                                                                                                                                   |
| EPI_ISL_875689                                                                                                                                                                                                 | Hospital do Servidor Publico                                                               | Instituto Adolfo Lutz, Interdisciplinary Procedures Center, Strategic Laboratory                           | Claudio Tavares Sacchi, Claudia Regina Gongcalves, Erica Valessa Ramos Gomes, Karoline Rodrigues Campos                                                                                                                                                                                                                                   |
| EPI_ISL_877769                                                                                                                                                                                                 | Department of Veterinary Science, National Institute of Infectious Diseases                | Pathogen Genomics Center, National Institute of Infectious Diseases                                        | Tsuyoshi Sakizuka, Keita Ishijima, Yuda Kuroda, Ken Maeda, Kenao Hokawa, Makoto Kuroda                                                                                                                                                                                                                                                    |
| EPI_ISL_904120, EPI_ISL_904121                                                                                                                                                                                 | LACEN - Laboratorio Central de Saude Publica do Para                                       | Evandro Chagas Institute                                                                                   | Santos, M.C.; Silva, A.M.; Junior, W.D.C.; Barbogalata, L.S.; Ferreira, J.A.; Sousa, E.M.A.; da Silva, P.S.; Pinheiro, K.C.; L.C.; Sousa Junior, E.C.                                                                                                                                                                                     |
| EPI_ISL_906068, EPI_ISL_906069                                                                                                                                                                                 | Instituto Adolfo Lutz - Regional de Campinas                                               | Instituto Adolfo Lutz, Interdisciplinary Procedures Center, Strategic Laboratory                           | Claudio Tavares Sacchi, Claudia Regina Gongcalves, Erica Valessa Ramos Gomes, Karoline Rodrigues Campos                                                                                                                                                                                                                                   |
| EPI_ISL_906071                                                                                                                                                                                                 | LACEN-PI DR, Costa Alvaenga                                                                | Instituto Adolfo Lutz, Interdisciplinary Procedures Center, Strategic Laboratory                           | Claudio Tavares Sacchi, Claudia Regina Gongcalves, Erica Valessa Ramos Gomes, Karoline Rodrigues Campos                                                                                                                                                                                                                                   |
| EPI_ISL_906075                                                                                                                                                                                                 | Hospital Geral de Via Penteado Dr. Jose Fangelia Sao Paulo                                 | Instituto Adolfo Lutz, Interdisciplinary Procedures Center, Strategic Laboratory                           | Claudio Tavares Sacchi, Claudia Regina Gongcalves, Erica Valessa Ramos Gomes, Karoline Rodrigues Campos                                                                                                                                                                                                                                   |
| EPI_ISL_906076, EPI_ISL_906077                                                                                                                                                                                 | Hospital Sao Luiz Sao Caetano                                                              | Instituto Adolfo Lutz, Interdisciplinary Procedures Center, Strategic Laboratory                           | Claudio Tavares Sacchi, Claudia Regina Gongcalves, Erica Valessa Ramos Gomes, Karoline Rodrigues Campos                                                                                                                                                                                                                                   |
| EPI_ISL_906080, EPI_ISL_906081                                                                                                                                                                                 | Hospital Beneficencia Portuguesa                                                           | Instituto Adolfo Lutz, Interdisciplinary Procedures Center, Strategic Laboratory                           | Claudio Tavares Sacchi, Claudia Regina Gongcalves, Erica Valessa Ramos Gomes, Karoline Rodrigues Campos                                                                                                                                                                                                                                   |
| EPI_ISL_913587                                                                                                                                                                                                 | Vault Health                                                                               | Minnesota Department of Health, Public Health Laboratory                                                   | Alexandra Lorenz, Jacob Garfin, Matt Plumb, and Xiong Wang                                                                                                                                                                                                                                                                                |
| EPI_ISL_918499, EPI_ISL_918500, EPI_ISL_918501, EPI_ISL_918502, EPI_ISL_918503, EPI_ISL_918504, EPI_ISL_918505, EPI_ISL_918506, EPI_ISL_918507, EPI_ISL_918508, EPI_ISL_918509, EPI_ISL_918510, EPI_ISL_918511 | LACEN - Laboratorio Central de Saude Publica do Amazonas                                   | Evandro Chagas Institute                                                                                   | Santos, M.C.; Silva, A.M.; Junior, W.D.C.; Barbogalata, L.S.; Ferreira, J.A.; Sousa, E.M.A.; da Silva, P.S.; Pinheiro, K.C.; L.C.; Sousa Junior, E.C.                                                                                                                                                                                     |
| EPI_ISL_925031, EPI_ISL_925032                                                                                                                                                                                 | Miralis                                                                                    | CNR Virus des Infections Respiratoires - France SUD                                                        | Antonin Bal, Gregory Destras, Gwendolynne Burfin, Hadrien Rigue, Quentin Semanas, Marine Valette, Bruno Lina, Laurence Josset                                                                                                                                                                                                             |
| EPI_ISL_940614, EPI_ISL_940615, EPI_ISL_940616, EPI_ISL_940617, EPI_ISL_940618                                                                                                                                 | LACEN-PI DR, Costa Alvaenga                                                                | Instituto Adolfo Lutz, Interdisciplinary Procedures Center, Strategic Laboratory                           | Claudio Tavares Sacchi, Claudia Regina Gongcalves, Erica Valessa Ramos Gomes, Karoline Rodrigues Campos                                                                                                                                                                                                                                   |
| EPI_ISL_940619, EPI_ISL_940620, EPI_ISL_940621, EPI_ISL_940622, EPI_ISL_940623, EPI_ISL_940624, EPI_ISL_940625                                                                                                 | Hospital Sao Joaquin - Beneficencia Portuguesa                                             | Instituto Adolfo Lutz, Interdisciplinary Procedures Center, Strategic Laboratory                           | Claudio Tavares Sacchi, Claudia Regina Gongcalves, Erica Valessa Ramos Gomes, Karoline Rodrigues Campos                                                                                                                                                                                                                                   |
| EPI_ISL_940626, EPI_ISL_940627                                                                                                                                                                                 | Hospital Central Sao Caetano do Sul                                                        | Instituto Adolfo Lutz, Interdisciplinary Procedures Center, Strategic Laboratory                           | Claudio Tavares Sacchi, Claudia Regina Gongcalves, Erica Valessa Ramos Gomes, Karoline Rodrigues Campos                                                                                                                                                                                                                                   |
| EPI_ISL_940630                                                                                                                                                                                                 | Hospital Geral de Sao Paulo                                                                | Instituto Adolfo Lutz, Interdisciplinary Procedures Center, Strategic Laboratory                           | Claudio Tavares Sacchi, Claudia Regina Gongcalves, Erica Valessa Ramos Gomes, Karoline Rodrigues Campos                                                                                                                                                                                                                                   |
| EPI_ISL_943045, EPI_ISL_943046                                                                                                                                                                                 | Dutch COVID-19 response team                                                               | National Institute for Public Health and the Environment (RIVM)                                            | Adam Meijer, Harry Vennema, Dirk Eggink, Jeroen Cramer, Sharon van den Brink, Bas van der Veer, ArneMieke van den Brandt, Florian Zwagemaker, Dennis Schmitz, Chantal Heusken, on behalf of the national COVID-19 response team                                                                                                           |
| EPI_ISL_943570                                                                                                                                                                                                 | Laboratorio de Referencia Nacional de Virus Respiratorio, Instituto Nacional de Salud Peru | Laboratorio de Referencia Nacional de Biotecnologia y Biologia Molecular, Instituto Nacional de Salud Peru | Carlos Padilla Rojas, Karolyn Vega Chozo, Luis Barceña, Píscala Lopa Pati, Omar Caceres Rey, Marco Galeza Perez, Maribel Huaranga Nuñez, Johanna Balbuena Torrez, Haniel Balon Calderon, Nancy Rojas Serrano                                                                                                                              |
| EPI_ISL_943967, EPI_ISL_943968, EPI_ISL_943969, EPI_ISL_943970, EPI_ISL_943971                                                                                                                                 | Hospital Geral de Sao Paulo                                                                | Instituto Adolfo Lutz, Interdisciplinary Procedures Center, Strategic Laboratory                           | Claudio Tavares Sacchi, Claudia Regina Gongcalves, Erica Valessa Ramos Gomes, Karoline Rodrigues Campos                                                                                                                                                                                                                                   |
| EPI_ISL_943987                                                                                                                                                                                                 | LACEN do Estado de Tocantins                                                               | Instituto Adolfo Lutz, Interdisciplinary Procedures Center, Strategic Laboratory                           | Claudio Tavares Sacchi, Claudia Regina Gongcalves, Erica Valessa Ramos Gomes, Karoline Rodrigues Campos                                                                                                                                                                                                                                   |
| EPI_ISL_943990                                                                                                                                                                                                 | LACEN do Estado de Goias                                                                   | Instituto Adolfo Lutz, Interdisciplinary Procedures Center, Strategic Laboratory                           | Claudio Tavares Sacchi, Claudia Regina Gongcalves, Erica Valessa Ramos Gomes, Karoline Rodrigues Campos                                                                                                                                                                                                                                   |
| EPI_ISL_956287, EPI_ISL_956289, EPI_ISL_956297                                                                                                                                                                 | Instituto Nacional de Saude- Direccion de Redes de Laboratorios de Saude Publica           | Instituto Nacional de Saude- Direccion de Investigacion en Saude Publica                                   | Katherine Laton-Donato, Diego A. Alvarez-Diaz, Carla Franco-Munoz, Mauricio Pacheco-Monrealguez, Hector Alejandro Ruiz-Moreno, Maria T. Herrera-Sapulveda, Diego Andres Prada, Thomazan Reanes-Gonzalez, Sheryll Corchuelo, Julian Nizazague, Gerardo Santamaría, Magdalena Wiesner, Mariana Lucia Ospina Martinez, Marcela Mercado-Reyes |

We gratefully acknowledge the following Authors from the Originating laboratories responsible for obtaining the specimens, as well as the Submitting laboratories where the genome data were generated and shared via GISAID, on which this research is based.

All Submitters of data may be contacted directly via [www.gisaid.org](http://www.gisaid.org)

Authors are sorted alphabetically.

| Accession ID                                                                                                                                                                                                                                                                                                                                                                                                                                                                                                                                                                                                                   | Originating Laboratory                                                                                             | Submitting Laboratory                                                                                                                                                                         | Authors                                                                                                                                                                                                                                                                                                                                                                                                                                                                          |
|--------------------------------------------------------------------------------------------------------------------------------------------------------------------------------------------------------------------------------------------------------------------------------------------------------------------------------------------------------------------------------------------------------------------------------------------------------------------------------------------------------------------------------------------------------------------------------------------------------------------------------|--------------------------------------------------------------------------------------------------------------------|-----------------------------------------------------------------------------------------------------------------------------------------------------------------------------------------------|----------------------------------------------------------------------------------------------------------------------------------------------------------------------------------------------------------------------------------------------------------------------------------------------------------------------------------------------------------------------------------------------------------------------------------------------------------------------------------|
| EPI_ISL_677211, EPI_ISL_677212                                                                                                                                                                                                                                                                                                                                                                                                                                                                                                                                                                                                 | Virginia Division of Consolidated Laboratory Services                                                              | Virginia Division of Consolidated Laboratory Services                                                                                                                                         | Virginia DCIS                                                                                                                                                                                                                                                                                                                                                                                                                                                                    |
| EPI_ISL_683969                                                                                                                                                                                                                                                                                                                                                                                                                                                                                                                                                                                                                 | DOHMH Morbidity                                                                                                    | New York City Public Health Laboratory                                                                                                                                                        | Jade Wang, et al.                                                                                                                                                                                                                                                                                                                                                                                                                                                                |
| EPI_ISL_717921, EPI_ISL_717922, EPI_ISL_717924, EPI_ISL_717925, EPI_ISL_717926, EPI_ISL_717927, EPI_ISL_717928, EPI_ISL_717929, EPI_ISL_717930, EPI_ISL_717931, EPI_ISL_717932, EPI_ISL_717933, EPI_ISL_717934, EPI_ISL_717935, EPI_ISL_717936, EPI_ISL_717937, EPI_ISL_717938, EPI_ISL_717939, EPI_ISL_717940, EPI_ISL_717941, EPI_ISL_717942, EPI_ISL_717943, EPI_ISL_717944, EPI_ISL_717945, EPI_ISL_717946, EPI_ISL_717947, EPI_ISL_717948, EPI_ISL_717949, EPI_ISL_717950, EPI_ISL_717951, EPI_ISL_717952, EPI_ISL_717953, EPI_ISL_717954, EPI_ISL_717955, EPI_ISL_717956, EPI_ISL_717957                                 | Laboratorio de Virologia Molecular / UFRJ                                                                          | Bioinformatics Laboratory / LNCC                                                                                                                                                              | Carolina M. Voloch, Ronaldo da Silva F. Jr., Lutz G P de Almeida, Cynthia C Cardoso, Otavio Buissoni, Alexandra L Garber, Ana Paula de C Guimarães, Diana Mariani, Andraea Cory Cavalcanti, Claudia dos Santos Rodrigues, Terezinha M P P de Castro, Ana Tereza R de Vasconcelos                                                                                                                                                                                                 |
| EPI_ISL_718344                                                                                                                                                                                                                                                                                                                                                                                                                                                                                                                                                                                                                 | Lighthouse Lab in Cambridge                                                                                        | Wellcome Sanger Institute for the COVID-19 Genomics UK (COG-UK) Consortium                                                                                                                    | Rob Howes, The Lighthouse Lab in Cambridge and Alex Alderton, Roberto Amato, Somé Gonçalves, Ewan Harrison, David K. Jackson, Ian Johnston, Dominic Kwiatkowski, Cordelia Langford, John Sillitoe on behalf of the Wellcome Sanger Institute COVID-19 Surveillance Team                                                                                                                                                                                                          |
| EPI_ISL_723494                                                                                                                                                                                                                                                                                                                                                                                                                                                                                                                                                                                                                 | Virginia Division of Consolidated Laboratory Services (DCIS)                                                       | Virginia Division of Consolidated Laboratory Services (DCIS)                                                                                                                                  | Virginia DCIS                                                                                                                                                                                                                                                                                                                                                                                                                                                                    |
| EPI_ISL_729285, EPI_ISL_729310                                                                                                                                                                                                                                                                                                                                                                                                                                                                                                                                                                                                 | Toronto Invasive Bacterial Diseases Network                                                                        | McMaster University                                                                                                                                                                           | Allison McGeer, Parityk Aftanas, Hooman Derakhshani, Angel L. Kuganya Nimalaratne, Emily Panousis, Ahmed Driala, Jalees Nasir, Michael Surette, Samira Mubareka, Andrew G. McArthur                                                                                                                                                                                                                                                                                              |
| EPI_ISL_731736                                                                                                                                                                                                                                                                                                                                                                                                                                                                                                                                                                                                                 | Lighthouse Lab in Adelaide Park                                                                                    | Wellcome Sanger Institute for the COVID-19 Genomics UK (COG-UK) Consortium                                                                                                                    | Jacquelyn Wynn, Mairead Hyland, The Lighthouse Lab in Adelaide Park, and Alex Alderton, Roberto Amato, Sonia Gonçalves, Ewan Harrison, David K. Jackson, Ian Johnston, Dominic Kwiatkowski, Cordelia Langford, John Sillitoe on behalf of the Wellcome Sanger Institute COVID-19 Surveillance Team                                                                                                                                                                               |
| EPI_ISL_736906                                                                                                                                                                                                                                                                                                                                                                                                                                                                                                                                                                                                                 | Pathogen Genomics Center, National Institute of Infectious Diseases                                                | Pathogen Genomics Center, National Institute of Infectious Diseases                                                                                                                           | Tsuyoshi Sekizuka, Kenaro Tokawa, Rina Tanaka, Masanori Hashino, Makoto Kuroda                                                                                                                                                                                                                                                                                                                                                                                                   |
| EPI_ISL_741517                                                                                                                                                                                                                                                                                                                                                                                                                                                                                                                                                                                                                 | Quadram Institute Bioscience                                                                                       | COVID-19 Genomics UK (COG-UK) Consortium                                                                                                                                                      | Dave J Baker, Gemma L. Kay, Alp Aydin, Thanh Le-Viet, Steven Rudder, Ana P. Tedin, Anastasia Kotva, Maria Diaz, Leonardo de Oliveira Martins, Nabil-Raed Alkhatib, Lizzie Meadows, Rachel Stanley, Nguzi Erunjo, Muhammad Tasir, Nicholas J. Thomson, Alexander J. Trotter, Rachel Gilly, Samuel Bloomfield, Claire Stuart, Andrew Bell, Heenesh Prakash, Sami Derisevic, Alison E. Walter, John Wain, Mark Webber, Andrew J. Page, Justin O'Grady                               |
| EPI_ISL_751195                                                                                                                                                                                                                                                                                                                                                                                                                                                                                                                                                                                                                 | UCSD EXCITE lab                                                                                                    | Andersen lab at Scripps Research                                                                                                                                                              | SEARHC Alliance San Diego                                                                                                                                                                                                                                                                                                                                                                                                                                                        |
| EPI_ISL_755642                                                                                                                                                                                                                                                                                                                                                                                                                                                                                                                                                                                                                 | Instituto Adolfo Lutz - Central                                                                                    | Instituto Adolfo Lutz, Interdisciplinary Procedures Center, Strategic Laboratory                                                                                                              | Claudio Tavares Sacchi, Claudia Regina Gonçalves, Erica Valéssia Ramos Gomes, Karoline Rodrigues Campos                                                                                                                                                                                                                                                                                                                                                                          |
| EPI_ISL_755645                                                                                                                                                                                                                                                                                                                                                                                                                                                                                                                                                                                                                 | Lab LOC - Ispocerica da Serra                                                                                      | Instituto Adolfo Lutz, Interdisciplinary Procedures Center, Strategic Laboratory                                                                                                              | Claudio Tavares Sacchi, Claudia Regina Gonçalves, Erica Valéssia Ramos Gomes, Karoline Rodrigues Campos                                                                                                                                                                                                                                                                                                                                                                          |
| EPI_ISL_755653, EPI_ISL_755653                                                                                                                                                                                                                                                                                                                                                                                                                                                                                                                                                                                                 | Instituto Adolfo Lutz - Central                                                                                    | Instituto Adolfo Lutz, Interdisciplinary Procedures Center, Strategic Laboratory                                                                                                              | Claudio Tavares Sacchi, Claudia Regina Gonçalves, Erica Valéssia Ramos Gomes, Karoline Rodrigues Campos                                                                                                                                                                                                                                                                                                                                                                          |
| EPI_ISL_755696, EPI_ISL_755699                                                                                                                                                                                                                                                                                                                                                                                                                                                                                                                                                                                                 | Toronto Invasive Bacterial Diseases Network                                                                        | McMaster University                                                                                                                                                                           | Allison McGeer, Parityk Aftanas, Hooman Derakhshani, Angel L. Kuganya Nimalaratne, Emily Panousis, Ahmed Driala, Jalees Nasir, Michael Surette, Samira Mubareka, Andrew G. McArthur                                                                                                                                                                                                                                                                                              |
| EPI_ISL_756294                                                                                                                                                                                                                                                                                                                                                                                                                                                                                                                                                                                                                 | Center for Biotechnology and Cell Therapy, São Rafael Hospital, Salvador, Brazil                                   | Center for Biotechnology and Cell Therapy, São Rafael Hospital, Salvador, Brazil                                                                                                              | Carolina Kymie Vasques Noronha, Marília Miranda Franco, Tiago Giral, Ana Verena Almeida Mendes, Renato Santana de Aguiar, Maria Giovannetti, Bruno Solano de Freitas Souza                                                                                                                                                                                                                                                                                                       |
| EPI_ISL_762436, EPI_ISL_762502                                                                                                                                                                                                                                                                                                                                                                                                                                                                                                                                                                                                 | Lighthouse Lab in Milton Keynes                                                                                    | Wellcome Sanger Institute for the COVID-19 Genomics UK (COG-UK) Consortium                                                                                                                    | The Lighthouse Lab in Milton Keynes and Alex Alderton, Roberto Amato, Sonia Gonçalves, Ewan Harrison, David K. Jackson, Ian Johnston, Dominic Kwiatkowski, Cordelia Langford, John Sillitoe on behalf of the Wellcome Sanger Institute COVID-19 Surveillance Team                                                                                                                                                                                                                |
| EPI_ISL_768702, EPI_ISL_768705                                                                                                                                                                                                                                                                                                                                                                                                                                                                                                                                                                                                 | Pathogen Genomics Center, National Institute of Infectious Diseases                                                | Pathogen Genomics Center, National Institute of Infectious Diseases                                                                                                                           | Tsuyoshi Sekizuka, Kenaro Tokawa, Rina Tanaka, Masanori Hashino, Makoto Kuroda                                                                                                                                                                                                                                                                                                                                                                                                   |
| EPI_ISL_770562, EPI_ISL_770563, EPI_ISL_770564, EPI_ISL_770565, EPI_ISL_770566, EPI_ISL_770568, EPI_ISL_770570, EPI_ISL_770571, EPI_ISL_770572, EPI_ISL_770573, EPI_ISL_770579, EPI_ISL_770580, EPI_ISL_770581, EPI_ISL_770583, EPI_ISL_770584, EPI_ISL_770587, EPI_ISL_770588, EPI_ISL_770591, EPI_ISL_770592, EPI_ISL_770593, EPI_ISL_770594, EPI_ISL_770595, EPI_ISL_770596, EPI_ISL_770602, EPI_ISL_770603, EPI_ISL_770604, EPI_ISL_770605, EPI_ISL_770606, EPI_ISL_770607, EPI_ISL_770616, EPI_ISL_770617, EPI_ISL_770618, EPI_ISL_770620, EPI_ISL_770621, EPI_ISL_770622, EPI_ISL_770624, EPI_ISL_770625, EPI_ISL_770628 | Laboratório de Microbiologia Molecular - Universidade FEEVALE                                                      | Bioinformatics Laboratory / LNCC                                                                                                                                                              | Felipe Bentes, Fernando Rosado Spilki, Alana Witt Hansen, Juliane Deise Fleck, Juliana Schorns, Merlane Demoliner, Ana Karolina Eisen Antunes, Fagner Henrique Heidl, Larissa Malinam, Bruna Heilmann, Ana Luiza Zukowski, Victoria Goes, Karoline Schlielbenberger, Mathias Nunes Weber, Paula Rodrigues de Almeida, Alessandra Pavan Lamarea da Silva, Ronaldo da Silva F. Jr., Lutz G P de Almeida, Alexandra L Garber, Ana Paula de C Guimarães, Ana Tereza R de Vasconcelos |
| see above                                                                                                                                                                                                                                                                                                                                                                                                                                                                                                                                                                                                                      | Laboratório de Microbiologia Molecular - Universidade FEEVALE                                                      | Bioinformatics Laboratory / LNCC                                                                                                                                                              | Felipe Bentes, Fernando Rosado Spilki, Alana Witt Hansen, Juliane Deise Fleck, Juliana Schorns, Merlane Demoliner, Ana Karolina Eisen Antunes, Fagner Henrique Heidl, Larissa Malinam, Bruna Heilmann, Ana Luiza Zukowski, Victoria Goes, Karoline Schlielbenberger, Mathias Nunes Weber, Paula Rodrigues de Almeida, Alessandra Pavan Lamarea da Silva, Ronaldo da Silva F. Jr., Lutz G P de Almeida, Alexandra L Garber, Ana Paula de C Guimarães, Ana Tereza R de Vasconcelos |
| EPI_ISL_775328, EPI_ISL_775329                                                                                                                                                                                                                                                                                                                                                                                                                                                                                                                                                                                                 | Akershus University Hospital, Department for Microbiology and Infectious Disease Control                           | Norwegian Institute of Public Health, Department of Virology                                                                                                                                  | Kathrine Steen-Johansen, Kamilla Heddeland Insetjord, Hilde Eishaug, Aiva R Allmarie Paulsen Madsen, Rasmus Riis Kopperud, Hilde Volian, Karoline Baumeister E., Avago M. Benedetti E., Russo M., Dattico ME, Ponorio A, Cisterna D., Molina V., Ferandoss C., Tudiri E., Lorenzo F., Poklepojich T., Campos J.                                                                                                                                                                  |
| EPI_ISL_775330                                                                                                                                                                                                                                                                                                                                                                                                                                                                                                                                                                                                                 | Servicio Virosis Respiratorias-Departamento Virología-INEI                                                         | Instituto Nacional Enfermedades Infecciosas C.G. Malbrán                                                                                                                                      | Baummeister E., Avago M., Benedetti E., Russo M., Dattico ME, Ponorio A, Cisterna D., Molina V., Ferandoss C., Tudiri E., Lorenzo F., Poklepojich T., Campos J.                                                                                                                                                                                                                                                                                                                  |
| EPI_ISL_778843                                                                                                                                                                                                                                                                                                                                                                                                                                                                                                                                                                                                                 | Laboratório de Microbiologia Molecular - Universidade FEEVALE                                                      | Bioinformatics Laboratory / LNCC                                                                                                                                                              | Felipe Bentes, Fernando Rosado Spilki, Alana Witt Hansen, Juliane Deise Fleck, Juliana Schorns, Merlane Demoliner, Ana Karolina Eisen Antunes, Fagner Henrique Heidl, Larissa Malinam, Bruna Heilmann, Ana Luiza Zukowski, Victoria Goes, Karoline Schlielbenberger, Mathias Nunes Weber, Paula Rodrigues de Almeida, Alessandra Pavan Lamarea da Silva, Ronaldo da Silva F. Jr., Lutz G P de Almeida, Alexandra L Garber, Ana Paula de C Guimarães, Ana Tereza R de Vasconcelos |
| EPI_ISL_791502, EPI_ISL_791511                                                                                                                                                                                                                                                                                                                                                                                                                                                                                                                                                                                                 | The Hospital for Sick Children                                                                                     | The Hospital for Sick Children                                                                                                                                                                | Aaron Campigotto, Christian Marshall, Lynette Lau                                                                                                                                                                                                                                                                                                                                                                                                                                |
| EPI_ISL_792522, EPI_ISL_792523                                                                                                                                                                                                                                                                                                                                                                                                                                                                                                                                                                                                 | Laboratorio de Virologia del Hospital de Niños Dr. Ricardo Gutiérrez                                               | Grupo de Genómica y Bioinformática del Instituto de Investigación de la Cadena Láctica CONICET-INIA on behalf of Proyecto Argentino Institucional de genómica de SARS-CoV-2 (PAIS Consortium) | Anaadio, A.F. Eberhardt, M.F. Iracequi, M. Torres, C. Aulicino, P. König, G. Acevedo, M.E. Alvarez Lopez, C. Alexay, S. Jacques, C. Mischchenko, A.S. Goya, S. Nabatsas Jodar, M.S. Viegas, M.                                                                                                                                                                                                                                                                                   |
| EPI_ISL_792524                                                                                                                                                                                                                                                                                                                                                                                                                                                                                                                                                                                                                 | Laboratorio de Virologia del Hospital de Niños Dr. Ricardo Gutiérrez                                               | Grupo de Genómica y Bioinformática del Instituto de Investigación de la Cadena Láctica CONICET-INIA on behalf of Proyecto Argentino Institucional de genómica de SARS-CoV-2 (PAIS Consortium) | Anaadio, A.F. Eberhardt, M.F. Iracequi, M. Torres, C. Aulicino, P. König, G. Acevedo, M.E. Alvarez Lopez, C. Alexay, S. Jacques, C. Mischchenko, A.S. Goya, S. Nabatsas Jodar, M.S. Viegas, M.                                                                                                                                                                                                                                                                                   |
| EPI_ISL_792525                                                                                                                                                                                                                                                                                                                                                                                                                                                                                                                                                                                                                 | Laboratorio del Hospital Interzonal General de Agudos Evita                                                        | Grupo de Genómica y Bioinformática del Instituto de Investigación de la Cadena Láctica CONICET-INIA on behalf of Proyecto Argentino Institucional de genómica de SARS-CoV-2 (PAIS Consortium) | Anaadio, A.F. Eberhardt, M.F. Iracequi, M. Torres, C. Aulicino, P. König, G. Acevedo, M.E. Alvarez Lopez, C. Alexay, S. Jacques, C. Mischchenko, A.S. Goya, S. Nabatsas Jodar, M.S. Viegas, M.                                                                                                                                                                                                                                                                                   |
| EPI_ISL_792560                                                                                                                                                                                                                                                                                                                                                                                                                                                                                                                                                                                                                 | Laboratorio de Ecología de Doenças Transmissíveis na Amazonia, Instituto Leonidas e Maria Deane - Fiocruz Amazonia | Laboratório de Ecologia de Doenças Transmissíveis na Amazonia, Instituto Leonidas e Maria Deane - Fiocruz Amazonia                                                                            | Valdineie Nascimento, Victor Souza, André Corado, Fernanda Nascimento, George Silva, Agatha Costa, Karina Passosa, Debora Duarte, Luciana Gonçalves, Maria Julia Brandão, Michele Jesus, Felipe Naveca                                                                                                                                                                                                                                                                           |
| EPI_ISL_792562, EPI_ISL_792634                                                                                                                                                                                                                                                                                                                                                                                                                                                                                                                                                                                                 | LACEN-PPB                                                                                                          | Laboratory of Respiratory Viruses and Measles, Oswaldo Cruz                                                                                                                                   | Paola Resende, Luciana Appolinario, Fernando Wotta, Ana Carolina Paxão, Ana Carolina Mendonça, João Felipe Bezerra, Romero Henrique Teixeira de                                                                                                                                                                                                                                                                                                                                  |

|                                                                                                                                                                |                                                                                                                            |                                                                                                                            |                                                                                                                                                                                                                                                                                                                                                                                                                                                                                                                                                                                   |
|----------------------------------------------------------------------------------------------------------------------------------------------------------------|----------------------------------------------------------------------------------------------------------------------------|----------------------------------------------------------------------------------------------------------------------------|-----------------------------------------------------------------------------------------------------------------------------------------------------------------------------------------------------------------------------------------------------------------------------------------------------------------------------------------------------------------------------------------------------------------------------------------------------------------------------------------------------------------------------------------------------------------------------------|
| EPI_ISL_792635                                                                                                                                                 | LACEN-AL                                                                                                                   | Institute, FIOCRUZ                                                                                                         | Vasconcelos, Dalaine Louladi Florentino Teixeira, Thiago Franco de Oliveira Carneiro, Marilda Siqueira                                                                                                                                                                                                                                                                                                                                                                                                                                                                            |
| EPI_ISL_792639                                                                                                                                                 | LACEN-PR                                                                                                                   | Laboratory of Respiratory Viruses and Measles, Oswaldo Cruz Institute, FIOCRUZ                                             | Paola Resende, Luciana Appolinario, Fernando Motta, Ana Carolina Paixao, Ana Carolina Mendonca, Anderson Brandao Leite, Marilda Siqueira                                                                                                                                                                                                                                                                                                                                                                                                                                          |
| EPI_ISL_792646, EPI_ISL_792650, EPI_ISL_792651, EPI_ISL_792652                                                                                                 | Lighthouse Lab in Cambridge                                                                                                | Laboratory of Respiratory Viruses and Measles, Oswaldo Cruz Institute, FIOCRUZ                                             | Paola Resende, Luciana Appolinario, Fernando Motta, Ana Carolina Paixao, Ana Carolina Mendonca, Maria do Carmo Debur, Irina Nastassja Riediger, Marilda Siqueira                                                                                                                                                                                                                                                                                                                                                                                                                  |
| EPI_ISL_796815                                                                                                                                                 | Lighthouse Lab in Cambridge                                                                                                | Wellcome Sanger Institute for the COVID-19 Genomics UK (COG-UK) Consortium                                                 | Jacquelyn Wynn, Mairead Hyland, The Lighthouse Lab in Abdeley Park and Alex Alderton, Roberto Amato, Sonia Gonçalves, Ewan Harrison, David K Jackson, Ian Johnston, Dominic Kwiatkowski, Cordelia Langford, John Sillince on behalf of the Wellcome Sanger Institute COVID-19 Surveillance Team                                                                                                                                                                                                                                                                                   |
| EPI_ISL_798217                                                                                                                                                 | Lighthouse Lab in Cambridge                                                                                                | Wellcome Sanger Institute for the COVID-19 Genomics UK (COG-UK) Consortium                                                 | Rob Howes, The Lighthouse Lab in Cambridge and Alex Alderton, Roberto Amato, Sonia Gonçalves, Ewan Harrison, David K Jackson, Ian Johnston, Dominic Kwiatkowski, Cordelia Langford, John Sillince on behalf of the Wellcome Sanger Institute COVID-19 Surveillance Team                                                                                                                                                                                                                                                                                                           |
| EPI_ISL_815666, EPI_ISL_815667                                                                                                                                 | Department of Virus and Microbiological Special Diagnostics, Statens Serum Institut, Copenhagen, Denmark                   | Abertsen Lab, Department of Chemistry and Bioscience, Aalborg University, Denmark                                          | Danish Covid-19 Genome Consortium                                                                                                                                                                                                                                                                                                                                                                                                                                                                                                                                                 |
| EPI_ISL_817064                                                                                                                                                 | Bioinformatics and Biostatistics Lab, Advanced Sequencing Facility                                                         | COVID-19 Genomics UK (COG-UK) Consortium                                                                                   | Aengus Stewart, Jerome Nicod, Chelsea Sawyer, Laura Cuhli, Harshil Patel, Margaret Crawford                                                                                                                                                                                                                                                                                                                                                                                                                                                                                       |
| EPI_ISL_818010                                                                                                                                                 | Department of Virus and Microbiological Special Diagnostics, Statens Serum Institut, Copenhagen, Denmark                   | Abertsen Lab, Department of Chemistry and Bioscience, Aalborg University, Denmark                                          | Danish Covid-19 Genome Consortium                                                                                                                                                                                                                                                                                                                                                                                                                                                                                                                                                 |
| EPI_ISL_832010                                                                                                                                                 | Laboratorio de Microbiologia Molecular - Universidade FEDERAL                                                              | Universidade Federal de Ciências da Saúde de Porto Alegre                                                                  | Vincius Bonetti Franceschi, Amanda de Moraes Mayer, Gabriela Diklin Galdana, Carla Andrietta Moreira Neves, Patricia Aline Gröts Ferreira, Gabriela Bertella Cyrys, Ricardo Anei Zimmerman, Livia Khrzevski, Fernando Rossato Spiki, Claudia Elizabeth Thompson                                                                                                                                                                                                                                                                                                                   |
| EPI_ISL_832289                                                                                                                                                 | DOHMH Morristama                                                                                                           | New York City Public Health Laboratory                                                                                     | Jade Wang, et al.                                                                                                                                                                                                                                                                                                                                                                                                                                                                                                                                                                 |
| EPI_ISL_833158                                                                                                                                                 | Instituto Adolfo Lutz - Regional de Santo André                                                                            | Instituto Adolfo Lutz, Interdisciplinary Procedures Center, Strategic Laboratory                                           | Claudio Tavares Saechli, Claudia Regina Gonçalves, Erica Valessa Ramos Gomes, Karoline Rodrigues Campos                                                                                                                                                                                                                                                                                                                                                                                                                                                                           |
| EPI_ISL_833161                                                                                                                                                 | Instituto Adolfo Lutz - Central                                                                                            | Instituto Adolfo Lutz, Interdisciplinary Procedures Center, Strategic Laboratory                                           | Claudio Tavares Saechli, Claudia Regina Gonçalves, Erica Valessa Ramos Gomes, Karoline Rodrigues Campos                                                                                                                                                                                                                                                                                                                                                                                                                                                                           |
| EPI_ISL_836143                                                                                                                                                 | Hospital de Campanha COVID-19 de Matipora                                                                                  | Instituto Adolfo Lutz, Interdisciplinary Procedures Center, Strategic Laboratory                                           | Claudio Tavares Saechli, Claudia Regina Gonçalves, Erica Valessa Ramos Gomes, Karoline Rodrigues Campos                                                                                                                                                                                                                                                                                                                                                                                                                                                                           |
| EPI_ISL_836877                                                                                                                                                 | Hospital Municipal Dr. Jose de Carvalho Florence                                                                           | Instituto Adolfo Lutz, Interdisciplinary Procedures Center, Strategic Laboratory                                           | Claudio Tavares Saechli, Claudia Regina Gonçalves, Erica Valessa Ramos Gomes, Karoline Rodrigues Campos                                                                                                                                                                                                                                                                                                                                                                                                                                                                           |
| EPI_ISL_837236                                                                                                                                                 | Respiratory Virus Unit, National Infection Service, Public Health England                                                  | COVID-19 Genomics UK (COG-UK) Consortium                                                                                   | PHE Covid Sequencing Team                                                                                                                                                                                                                                                                                                                                                                                                                                                                                                                                                         |
| EPI_ISL_842052                                                                                                                                                 | Centre for Enzyme Innovation, University of Portsmouth / Translational Research Laboratory, Portsmouth Hospitals NHS Trust | COVID-19 Genomics UK (COG-UK) Consortium                                                                                   | Angela Beckett, Yann Bourgeois, Garry Scallott, Sharon Glaysher, Scott Elliott, Kelly Bicknell, Robert Impey, Allyson Lloyd, Sarah Wylie, Ethan Bucher, Anoop Chaturhan, Samuel Robson                                                                                                                                                                                                                                                                                                                                                                                            |
| EPI_ISL_843260                                                                                                                                                 | Department of Virus and Microbiological Special Diagnostics, Statens Serum Institut, Copenhagen, Denmark                   | Abertsen Lab, Department of Chemistry and Bioscience, Aalborg University, Denmark                                          | Danish Covid-19 Genome Consortium                                                                                                                                                                                                                                                                                                                                                                                                                                                                                                                                                 |
| EPI_ISL_845768                                                                                                                                                 | Emory Molecular Diagnostics Laboratory, Emory Healthcare                                                                   | Plantadosi Lab, Emory Department of Pathology                                                                              | Ahmed Bahiker, Aime Plantadosi                                                                                                                                                                                                                                                                                                                                                                                                                                                                                                                                                    |
| EPI_ISL_848196, EPI_ISL_848197, EPI_ISL_848606, EPI_ISL_848607, EPI_ISL_848608                                                                                 | Microbiology Lab                                                                                                           | NBCC Sequencing Facility                                                                                                   | Dr. Jeff Wraha                                                                                                                                                                                                                                                                                                                                                                                                                                                                                                                                                                    |
| EPI_ISL_851030                                                                                                                                                 | Erando Chagas Institute                                                                                                    | Erando Chagas Institute                                                                                                    | Santos, M.C.; Silva, A.M.; Junior, W.D.C.; Bandegalata, L.S.; Ferreira, J.A.; Sousa, E.M.A.; da Silva, P.S.; Pinheiro, K.C.; L.C.; Sousa Junior, E.C.                                                                                                                                                                                                                                                                                                                                                                                                                             |
| EPI_ISL_861475                                                                                                                                                 | Gundersen Molecular Diagnostics Laboratory                                                                                 | Genomics and Discovery, Respiratory Viruses Branch, Division of Viral Diseases, Centers for Disease Control and Prevention | Peter W. Cook, Dhwanit Batra, Ben L. Rambo-Martin Elean de Feo, Yan Antico, Christine Tran, Matthew Tolentino, Shannon Wickline, Kim Gietzen, Brad Slicker, Jingqiao Liu, Eric Allen, Phil Febbo, Summer Galloway, Nicole L. Washington, Simon White, Geraint Llewain, Kelly Schaboor Barrett, Elizabeth Crutli, Alexandre Boize, Ary Ascencio, Charlotte Rivera-Garcia, Ryan Cho, Jason Nguyen, Sherry Wang, Jimmy Ramirez, Tyler Cassens, Eren Sandoval, Magnus Isaksson, William Lee, David Becker, Marc Laurent, James Lu, Clinton R. Paden, Suixiang Tong, Duncan MacCannell |
| EPI_ISL_861668                                                                                                                                                 | Centro de Triagem Covid19                                                                                                  | Kabara Cancer Research Institute                                                                                           | Craig S. Richmond, Parati A. Kerry                                                                                                                                                                                                                                                                                                                                                                                                                                                                                                                                                |
| EPI_ISL_861674, EPI_ISL_861675                                                                                                                                 | UPA Central de Caraguatatuba                                                                                               | Instituto Adolfo Lutz, Interdisciplinary Procedures Center, Strategic Laboratory                                           | Claudio Tavares Saechli, Claudia Regina Gonçalves, Erica Valessa Ramos Gomes, Karoline Rodrigues Campos                                                                                                                                                                                                                                                                                                                                                                                                                                                                           |
| EPI_ISL_861676                                                                                                                                                 | UPA Vila Santa Catarina                                                                                                    | Instituto Adolfo Lutz, Interdisciplinary Procedures Center, Strategic Laboratory                                           | Claudio Tavares Saechli, Claudia Regina Gonçalves, Erica Valessa Ramos Gomes, Karoline Rodrigues Campos                                                                                                                                                                                                                                                                                                                                                                                                                                                                           |
| EPI_ISL_861677                                                                                                                                                 | Instituto Adolfo Lutz - Central                                                                                            | Instituto Adolfo Lutz, Interdisciplinary Procedures Center, Strategic Laboratory                                           | Claudio Tavares Saechli, Claudia Regina Gonçalves, Erica Valessa Ramos Gomes, Karoline Rodrigues Campos                                                                                                                                                                                                                                                                                                                                                                                                                                                                           |
| EPI_ISL_861679                                                                                                                                                 | Instituto Adolfo Lutz - Regional de Taubate                                                                                | Instituto Adolfo Lutz, Interdisciplinary Procedures Center, Strategic Laboratory                                           | Claudio Tavares Saechli, Claudia Regina Gonçalves, Erica Valessa Ramos Gomes, Karoline Rodrigues Campos                                                                                                                                                                                                                                                                                                                                                                                                                                                                           |
| EPI_ISL_861683                                                                                                                                                 | Complexo Hospitalar Padre Bento de Guarulhos                                                                               | Instituto Adolfo Lutz, Interdisciplinary Procedures Center, Strategic Laboratory                                           | Claudio Tavares Saechli, Claudia Regina Gonçalves, Erica Valessa Ramos Gomes, Karoline Rodrigues Campos                                                                                                                                                                                                                                                                                                                                                                                                                                                                           |
| EPI_ISL_861684, EPI_ISL_861685                                                                                                                                 | Hospital Pronto Socorro Itaquera                                                                                           | Instituto Adolfo Lutz, Interdisciplinary Procedures Center, Strategic Laboratory                                           | Claudio Tavares Saechli, Claudia Regina Gonçalves, Erica Valessa Ramos Gomes, Karoline Rodrigues Campos                                                                                                                                                                                                                                                                                                                                                                                                                                                                           |
| EPI_ISL_861870, EPI_ISL_861871, EPI_ISL_861872, EPI_ISL_861877, EPI_ISL_861878, EPI_ISL_861880, EPI_ISL_861882, EPI_ISL_861883, EPI_ISL_861887, EPI_ISL_861904 | LATE - Laboratório de Técnicas Especiais - Hospital Israelita Albert Einstein                                              | LATE - Laboratório de Técnicas Especiais - Hospital Israelita Albert Einstein                                              | David Angarsten, Fernanda de Mello Malta, Raquel Riyuzo, Ana Paula Moreira Sales, Pedro Henrique Saba Rodrigues, João Renato Rebelo Pinho                                                                                                                                                                                                                                                                                                                                                                                                                                         |
| EPI_ISL_870615, EPI_ISL_870724                                                                                                                                 | Department of Virus and Microbiological Special Diagnostics, Statens Serum Institut, Copenhagen, Denmark                   | Aalborg University                                                                                                         | Danish Covid-19 Genome Consortium                                                                                                                                                                                                                                                                                                                                                                                                                                                                                                                                                 |
| EPI_ISL_873180                                                                                                                                                 | Microbiology Division, South Carolina Department of Health and Environmental Control (SC DHEC)                             | Microbiology Division, South Carolina Department of Health and Environmental Control (SC DHEC)                             | Michael Carr, Gabriel Gonzalez, Jonathan Dean, Cillian F De Gascun                                                                                                                                                                                                                                                                                                                                                                                                                                                                                                                |
| EPI_ISL_875350, EPI_ISL_875352                                                                                                                                 | National Virus Reference Laboratory                                                                                        | National Virus Reference Laboratory                                                                                        | Floraes H., Freeman J.                                                                                                                                                                                                                                                                                                                                                                                                                                                                                                                                                            |
| EPI_ISL_875687                                                                                                                                                 | Department of Infectious Diseases, Istituto Superiore di Sanità, Rome, Italy; UCO Igiene e Sanità Pubblica, ASUGI,         | Istituto Superiore di Sanità (ISS)                                                                                         | Paola Stefanelli, Angela Di Martino, Alessandra Lo Presti, Stefano Fiore, Pierluotaro Di Agaro, Ludovica Segati, Danilo Licastro, Alessandro Marcollo, Manuela Marra, Maria Carolina, Marco Crescenzi                                                                                                                                                                                                                                                                                                                                                                             |

|                                                                                                                                                |                                                                                                              |                                                                                                                                             |                                                                                                                                             |                                                                                                                                                                                                                                                                                                                                                                                                                       |
|------------------------------------------------------------------------------------------------------------------------------------------------|--------------------------------------------------------------------------------------------------------------|---------------------------------------------------------------------------------------------------------------------------------------------|---------------------------------------------------------------------------------------------------------------------------------------------|-----------------------------------------------------------------------------------------------------------------------------------------------------------------------------------------------------------------------------------------------------------------------------------------------------------------------------------------------------------------------------------------------------------------------|
| EP1_ISL_875751, EP1_ISL_875798                                                                                                                 | Public Health Ontario Laboratory                                                                             | Public Health Ontario Laboratory                                                                                                            | Public Health Ontario Laboratory                                                                                                            | Vanessa G Allen, Phillip Barth, Yao Chen, Richard de Boer, Alizea Estaghli, Manuel Fitzkeid, Christine Franz, Jonathan B Gubbay, Jennifer L Guthrie, Lawrence Heiser, Esna Jushi, Michael Laszofy, Alvin Li, Michael CY Li, Dean Maxwell, Sandeep Nagra, Samir N Patel, Jared Simpson, Karthikeyan Sivaratan, Ashleigh Sullivan, Yogi Sundaravadaman, Sarah Teator, Matthew Wilson, Andre Villegas, Sandra Zittermann |
| EP1_ISL_878666                                                                                                                                 | Rady's Childrens Hospital                                                                                    | Andersen lab at Scripps Research                                                                                                            | Instituto Adolfo Lutz, Interdisciplinary Procedures Center, Strategic Laboratory                                                            | Claudio Tavares Sacchi, Claudia Regina Gonçalves, Erica Valessa Ramos Gomes, Karoline Rodrigues Campos                                                                                                                                                                                                                                                                                                                |
| EP1_ISL_882657                                                                                                                                 | LACEN do Estado do Piauí, Dr. Costa Alvarenga                                                                | Instituto Adolfo Lutz, Interdisciplinary Procedures Center, Strategic Laboratory                                                            | Instituto Adolfo Lutz, Interdisciplinary Procedures Center, Strategic Laboratory                                                            | Claudio Tavares Sacchi, Claudia Regina Gonçalves, Erica Valessa Ramos Gomes, Karoline Rodrigues Campos                                                                                                                                                                                                                                                                                                                |
| EP1_ISL_882668                                                                                                                                 | UMS de Juquitha                                                                                              | Instituto Adolfo Lutz, Interdisciplinary Procedures Center, Strategic Laboratory                                                            | Instituto Adolfo Lutz, Interdisciplinary Procedures Center, Strategic Laboratory                                                            | Claudio Tavares Sacchi, Claudia Regina Gonçalves, Erica Valessa Ramos Gomes, Karoline Rodrigues Campos                                                                                                                                                                                                                                                                                                                |
| EP1_ISL_882669                                                                                                                                 | UPA Vila Santa Catarina                                                                                      | Instituto Adolfo Lutz, Interdisciplinary Procedures Center, Strategic Laboratory                                                            | Instituto Adolfo Lutz, Interdisciplinary Procedures Center, Strategic Laboratory                                                            | Claudio Tavares Sacchi, Claudia Regina Gonçalves, Erica Valessa Ramos Gomes, Karoline Rodrigues Campos                                                                                                                                                                                                                                                                                                                |
| EP1_ISL_882671, EP1_ISL_882673                                                                                                                 | Hospital Municipal Dr. Guido Guida                                                                           | Instituto Adolfo Lutz, Interdisciplinary Procedures Center, Strategic Laboratory                                                            | Instituto Adolfo Lutz, Interdisciplinary Procedures Center, Strategic Laboratory                                                            | Claudio Tavares Sacchi, Claudia Regina Gonçalves, Erica Valessa Ramos Gomes, Karoline Rodrigues Campos                                                                                                                                                                                                                                                                                                                |
| EP1_ISL_884002                                                                                                                                 | Labo Analyses Med                                                                                            | National Reference Center for Viruses of Respiratory Infections, Institut Pasteur, Paris                                                    | National Reference Center for Viruses of Respiratory Infections, Institut Pasteur, Paris                                                    | Marion Barbet, Sylvie Behillil, Méline Bizard, Angela Brisebarre, Camille Capel, Etienne Simon-Lorière, Vincent Enout, Maud Vanpeeene, Sylvie van der Werf, Rousselet Dominique                                                                                                                                                                                                                                       |
| EP1_ISL_886066, EP1_ISL_886148                                                                                                                 | Labo Analyses Med                                                                                            | National Reference Center for Viruses of Respiratory Infections, Institut Pasteur, Paris                                                    | National Reference Center for Viruses of Respiratory Infections, Institut Pasteur, Paris                                                    | Marion Barbet, Sylvie Behillil, Méline Bizard, Angela Brisebarre, Camille Capel, Etienne Simon-Lorière, Vincent Enout, Maud Vanpeeene, Sylvie van der Werf, Rousselet Dominique                                                                                                                                                                                                                                       |
| EP1_ISL_886166, EP1_ISL_886167, EP1_ISL_886168                                                                                                 | Lighthouse Lab in Akeley Park                                                                                | Wellcome Sanger Institute for the COVID-19 Genomics UK (COG-UK) Consortium                                                                  | Genomics and Discovery, Respiratory Viruses Branch, Division of Viral Diseases, Centers for Disease Control and Prevention                  | Jacquelin Wynn, Mairead Hyland, The Lighthouse Lab in Akeley Park and Alex Aberton, Roberto Arabo, Sonia Gonçalves, Ewan Harrison, David K Jackson, Ian Johnson, Dominic Kwiatkowski, Cordelia Langford, John Shiloe on behalf of the Wellcome Sanger Institute COVID-19 Surveillance Team                                                                                                                            |
| EP1_ISL_890353                                                                                                                                 | Labo Analyses Med                                                                                            | National Reference Center for Viruses of Respiratory Infections, Institut Pasteur, Paris                                                    | National Reference Center for Viruses of Respiratory Infections, Institut Pasteur, Paris                                                    | Marion Barbet, Sylvie Behillil, Méline Bizard, Angela Brisebarre, Camille Capel, Etienne Simon-Lorière, Vincent Enout, Maud Vanpeeene, Sylvie van der Werf, Rousselet Dominique                                                                                                                                                                                                                                       |
| EP1_ISL_892624                                                                                                                                 | SUNY UPSTATE MEDICAL UNIVERSITY                                                                              | Wadsworth Center, New York State Department of Health                                                                                       | Wadsworth Center, New York State Department of Health                                                                                       | Kristen St. George, Daryl M. Lamson, Alexis Ruseai, Matthew Shurt, Melissa A Leisner, Jonathan Pihnick, Navjot Singh, John Kelly, Erasmus Schneider, Erica Lesak-Nesslequist                                                                                                                                                                                                                                          |
| EP1_ISL_897698, EP1_ISL_897700                                                                                                                 | University Hospitals of Geneva, Laboratory of Virology                                                       | HUG, Laboratory of Virology and the Health2030 Genome Center                                                                                | HUG, Laboratory of Virology and the Health2030 Genome Center                                                                                | Samuel Cordey, Ana Rita Gonçalves, Laurent Kaiser, Lorenzo Cecutti, Henri Pegonet, Mélyssa Elies, Deborah Peret, Keith Harshman, Ioannis Xenarios, Emanuel Dermizakis                                                                                                                                                                                                                                                 |
| EP1_ISL_899553                                                                                                                                 | Voilier AG                                                                                                   | Department of Biosystems Science and Engineering, ETH Zürich                                                                                | Department of Biosystems Science and Engineering, ETH Zürich                                                                                | Christian Besei, Sarah Nedea, Chaocan Chen, Yuan Tonboily, Philipp Jablonksi, Lara Furmann, David Derfuss, Katharina John Tobias Schär, Ina Nissen, Natascha Sarntinoranont, Elodie Burcklen, Christiane Beckmann, Maurice Redondo, Olivier Koenig, Christoph Koppert, Sophie Seidel, Neemie Santamaria de Souza, Niko Beersemmickel, Tanja Stadler                                                                   |
| EP1_ISL_903554, EP1_ISL_903564                                                                                                                 | Quest Diagnostics                                                                                            | Quest Diagnostics                                                                                                                           | Quest Diagnostics                                                                                                                           | Rosenthal, S.H., Gerasimova A., Kagan R.M., Anderson B., Bernstein, L.E., Livingston, K.E., Perez, A., Shalhout, D.F., Shvachker, I.A., Owen, R., Tappaloon, P., Lachawan, F.                                                                                                                                                                                                                                         |
| EP1_ISL_904827, EP1_ISL_904838                                                                                                                 | Dutch COVID-19 response team                                                                                 | National Institute for Public-Health and the Environment (RIVM)                                                                             | National Institute for Public-Health and the Environment (RIVM)                                                                             | Adam Meijer, Henry Vermeera, Dirk Eggink, Jeroen Cremer, Sharon van den Brik, Bas van der Veer, Anneliekla van den Brandt, Florian Zwagemaker, Dennis Schmitz, Oriantal Heusken, on behalf of the national COVID-19 response team                                                                                                                                                                                     |
| EP1_ISL_906070, EP1_ISL_906072                                                                                                                 | UPA Dr. Aíra Tada                                                                                            | Instituto Adolfo Lutz, Interdisciplinary Procedures Center, Strategic Laboratory                                                            | Instituto Adolfo Lutz, Interdisciplinary Procedures Center, Strategic Laboratory                                                            | Claudio Tavares Sacchi, Claudia Regina Gonçalves, Erica Valessa Ramos Gomes, Karoline Rodrigues Campos                                                                                                                                                                                                                                                                                                                |
| EP1_ISL_906146                                                                                                                                 | Gundersen Molecular/Diagnostics Laboratory                                                                   | Kabara Cancer Research Institute                                                                                                            | Kabara Cancer Research Institute                                                                                                            | Craig S. Richmond, Parat C. Kenny                                                                                                                                                                                                                                                                                                                                                                                     |
| EP1_ISL_906972                                                                                                                                 | Infectious Diseases, Quest Diagnostics                                                                       | Infectious Diseases, Quest Diagnostics                                                                                                      | Infectious Diseases, Quest Diagnostics                                                                                                      | Rosenthal, S.H., Gerasimova, A., Kagan, R.M., Anderson, B., Bernstein, L.E., Livingston, K.E., Hua, M., Liu, Y., Shalhout, D.F., Owen, R., Lachawan, F.                                                                                                                                                                                                                                                               |
| EP1_ISL_912885                                                                                                                                 | Hopital Henri Mondror                                                                                        | Department of Virology, Henri Mondror University Hospital, Assistance Publique Hôpitaux de Paris, Université Paris-Est Creteil, INSERM U935 | Department of Virology, Henri Mondror University Hospital, Assistance Publique Hôpitaux de Paris, Université Paris-Est Creteil, INSERM U935 | Christophe Rodriguez, Slim Fouat, Vanessa Demontant, Guillaume Gircourt, Weissa N'Deoi, Alexandre Soulier, Elisabeth Trawinski, Jean-Michel Pawlotsky                                                                                                                                                                                                                                                                 |
| EP1_ISL_913445                                                                                                                                 | Institute for Infectious Diseases, University of Bern, Switzerland                                           | Institute for Infectious Diseases, University of Bern, Switzerland                                                                          | Institute for Infectious Diseases, University of Bern, Switzerland                                                                          | Michel C Koch, Christian Baumann, Mijuel A Tarrazos Mirni, Cora Stäger, Pascal Bittel, Steffen L Leib, Peter Keller, Franziska Suter-Frinker, Alban Ramette                                                                                                                                                                                                                                                           |
| EP1_ISL_913575                                                                                                                                 | M Health Fairview                                                                                            | Minnesota Department of Health, Public Health Laboratory                                                                                    | Minnesota Department of Health, Public Health Laboratory                                                                                    | Alexandra Lorentz, Jacob Garfin, Matt Plumb, and Xiong Wang                                                                                                                                                                                                                                                                                                                                                           |
| EP1_ISL_914708                                                                                                                                 | Maryland Public Health Laboratory (MD-PHL)                                                                   | Maryland Public Health Laboratory (MD-PHL)                                                                                                  | Maryland Public Health Laboratory (MD-PHL)                                                                                                  | Rosenthal, S.H., Gerasimova, A., Kagan, R.M., Anderson, B., Hua, M., Liu, Y., Bernstein, L.E., Livingston, K.E., Perez, A., Shalhout, D.F., Shvachker, I.A., Owen, R., Tappaloon, P., Lachawan, F.                                                                                                                                                                                                                    |
| EP1_ISL_915250, EP1_ISL_915327                                                                                                                 | Quest Diagnostics                                                                                            | Quest Diagnostics                                                                                                                           | Quest Diagnostics                                                                                                                           | Rosenthal, S.H., Gerasimova, A., Kagan, R.M., Anderson, B., Hua, M., Liu, Y., Bernstein, L.E., Livingston, K.E., Perez, A., Shalhout, D.F., Shvachker, I.A., Owen, R., Tappaloon, P., Lachawan, F.                                                                                                                                                                                                                    |
| EP1_ISL_916514                                                                                                                                 | Evandro Chagas Institute                                                                                     | Evandro Chagas Institute                                                                                                                    | Evandro Chagas Institute                                                                                                                    | Santos, M.C.; Silva, A.M.; Junior, W.D.C.; Barbogaglia, L.S.; Ferreira, J.A.; Sousa, E.M.A.; da Silva, P.S.; Pinheiro, K.C.; L.C.; Sousa Junior, E.C.                                                                                                                                                                                                                                                                 |
| EP1_ISL_918516, EP1_ISL_918517                                                                                                                 | LACEN - Laboratório Central de Saúde Pública do Para                                                         | Evandro Chagas Institute                                                                                                                    | Evandro Chagas Institute                                                                                                                    | Santos, M.C.; Silva, A.M.; Junior, W.D.C.; Barbogaglia, L.S.; Ferreira, J.A.; Sousa, E.M.A.; da Silva, P.S.; Pinheiro, K.C.; L.C.; Sousa Junior, E.C.                                                                                                                                                                                                                                                                 |
| EP1_ISL_918519, EP1_ISL_918520                                                                                                                 | LACEN - Laboratório Central de Saúde Pública do Ceara                                                        | Evandro Chagas Institute                                                                                                                    | Evandro Chagas Institute                                                                                                                    | Santos, M.C.; Silva, A.M.; Junior, W.D.C.; Barbogaglia, L.S.; Ferreira, J.A.; Sousa, E.M.A.; da Silva, P.S.; Pinheiro, K.C.; L.C.; Sousa Junior, E.C.                                                                                                                                                                                                                                                                 |
| EP1_ISL_918521                                                                                                                                 | Evandro Chagas Institute                                                                                     | Evandro Chagas Institute                                                                                                                    | Evandro Chagas Institute                                                                                                                    | Santos, M.C.; Silva, A.M.; Junior, W.D.C.; Barbogaglia, L.S.; Ferreira, J.A.; Sousa, E.M.A.; da Silva, P.S.; Pinheiro, K.C.; L.C.; Sousa Junior, E.C.                                                                                                                                                                                                                                                                 |
| EP1_ISL_918523, EP1_ISL_918526, EP1_ISL_918527, EP1_ISL_918528, EP1_ISL_918529, EP1_ISL_918530                                                 | LACEN - Laboratório Central de Saúde Pública do Para                                                         | Evandro Chagas Institute                                                                                                                    | Evandro Chagas Institute                                                                                                                    | Santos, M.C.; Silva, A.M.; Junior, W.D.C.; Barbogaglia, L.S.; Ferreira, J.A.; Sousa, E.M.A.; da Silva, P.S.; Pinheiro, K.C.; L.C.; Sousa Junior, E.C.                                                                                                                                                                                                                                                                 |
| EP1_ISL_918534                                                                                                                                 | LACEN - Laboratório Central de Saúde Pública do Amazonas                                                     | Evandro Chagas Institute                                                                                                                    | Evandro Chagas Institute                                                                                                                    | Santos, M.C.; Silva, A.M.; Junior, W.D.C.; Barbogaglia, L.S.; Ferreira, J.A.; Sousa, E.M.A.; da Silva, P.S.; Pinheiro, K.C.; L.C.; Sousa Junior, E.C.                                                                                                                                                                                                                                                                 |
| EP1_ISL_918536, EP1_ISL_918537, EP1_ISL_918538, EP1_ISL_918539, EP1_ISL_918540, EP1_ISL_918541, EP1_ISL_918542, EP1_ISL_918543, EP1_ISL_918544 | LACEN - Laboratório Central de Saúde Pública do Ceara                                                        | Evandro Chagas Institute                                                                                                                    | Evandro Chagas Institute                                                                                                                    | Santos, M.C.; Silva, A.M.; Junior, W.D.C.; Barbogaglia, L.S.; Ferreira, J.A.; Sousa, E.M.A.; da Silva, P.S.; Pinheiro, K.C.; L.C.; Sousa Junior, E.C.                                                                                                                                                                                                                                                                 |
| EP1_ISL_918546, EP1_ISL_918546, EP1_ISL_918547, EP1_ISL_918548, EP1_ISL_918549, EP1_ISL_918552                                                 | LACEN - Laboratório Central de Saúde Pública do Para                                                         | Evandro Chagas Institute                                                                                                                    | Evandro Chagas Institute                                                                                                                    | Santos, M.C.; Silva, A.M.; Junior, W.D.C.; Barbogaglia, L.S.; Ferreira, J.A.; Sousa, E.M.A.; da Silva, P.S.; Pinheiro, K.C.; L.C.; Sousa Junior, E.C.                                                                                                                                                                                                                                                                 |
| EP1_ISL_918553, EP1_ISL_918555, EP1_ISL_918556, EP1_ISL_918557, EP1_ISL_918558, EP1_ISL_918559, EP1_ISL_918560, EP1_ISL_918561                 | LACEN - Laboratório Central de Saúde Pública do Amapa                                                        | Evandro Chagas Institute                                                                                                                    | Evandro Chagas Institute                                                                                                                    | Santos, M.C.; Silva, A.M.; Junior, W.D.C.; Barbogaglia, L.S.; Ferreira, J.A.; Sousa, E.M.A.; da Silva, P.S.; Pinheiro, K.C.; L.C.; Sousa Junior, E.C.                                                                                                                                                                                                                                                                 |
| EP1_ISL_924202                                                                                                                                 | Virology Department, Sheffield Teaching Hospitals NHS Foundation Trust/Department of Infection, Immunity and | COVID-19 Genomics UK (COG-UK) Consortium                                                                                                    | COVID-19 Genomics UK (COG-UK) Consortium                                                                                                    | Thushan de Silva, Matthew Parker, Nikki Smith, Adil Anjyal, Rebecca Brown, Luke Green, Rachel Tucker, Paul Parsons, Danielle Groves, Katie Johnson, Laura Carrilero, Alex Keeley, Dave Partridge, Matthew Wyles, Benjamin Lindsey, Mehmet Yavuz, Mohammad Raza, Carlad Evans                                                                                                                                          |



|                                |                                                                                                                                                                                                 |                                                       |                                                                                                                                |  |  |                                                                                                                                                                                                                                                                                                                                                                                                                              |
|--------------------------------|-------------------------------------------------------------------------------------------------------------------------------------------------------------------------------------------------|-------------------------------------------------------|--------------------------------------------------------------------------------------------------------------------------------|--|--|------------------------------------------------------------------------------------------------------------------------------------------------------------------------------------------------------------------------------------------------------------------------------------------------------------------------------------------------------------------------------------------------------------------------------|
|                                | Cardiovascular Disease, The Medical School, University of Sheffield                                                                                                                             | Virginia DCLS                                         |                                                                                                                                |  |  |                                                                                                                                                                                                                                                                                                                                                                                                                              |
| EPI_ISL_925204                 |                                                                                                                                                                                                 | New Mexico Department of Health Scientific Laboratory | Virginia DCLS                                                                                                                  |  |  |                                                                                                                                                                                                                                                                                                                                                                                                                              |
| EPI_ISL_925253                 |                                                                                                                                                                                                 | New Mexico Department of Health Scientific Laboratory | Aalborg University                                                                                                             |  |  | Ellie Johnson, Anastacia Giego-Fisher, Deirdra Malone, Jennifer Benoit                                                                                                                                                                                                                                                                                                                                                       |
| EPI_ISL_928027, EPI_ISL_928257 | Department of Virus and Microbiological Special Diagnostics, Statens Serum Institut, Copenhagen, Denmark                                                                                        |                                                       | Maryland Public Health Laboratory (MD PHL)                                                                                     |  |  | Danish Covid-19 Genome Consortium                                                                                                                                                                                                                                                                                                                                                                                            |
| EPI_ISL_931489                 |                                                                                                                                                                                                 |                                                       | National Reference Center for Viruses of Respiratory Infections, Institut Pasteur, Paris                                       |  |  | Maryland Department of Health Laboratories Administration                                                                                                                                                                                                                                                                                                                                                                    |
| EPI_ISL_935547                 | Labo Analyses Med                                                                                                                                                                               |                                                       | Wadsworth Center, New York State Department of Health                                                                          |  |  | Ramon Lorenzo-Felardo, Lacy M. Simons, Chad Y. Achenbach, Lawrence J. Jennings, Michael G. Ison, Judd F. Hulquist, Egon A. Ozer                                                                                                                                                                                                                                                                                              |
| EPI_ISL_936295                 | MONTEFIORE MEDICAL CENTER LABORATORIES                                                                                                                                                          |                                                       | Ozer Lab                                                                                                                       |  |  | Malik N., Dewey H., and Tenney R.                                                                                                                                                                                                                                                                                                                                                                                            |
| EPI_ISL_936986                 | Northwestern Memorial Hospital                                                                                                                                                                  |                                                       | Tenney Lab, The Jackson Laboratory                                                                                             |  |  |                                                                                                                                                                                                                                                                                                                                                                                                                              |
| EPI_ISL_937443, EPI_ISL_937444 | Maine Health and Environmental Testing Laboratory (Maine HETL)                                                                                                                                  |                                                       | Instituto Adolfo Lutz, Interdisciplinary Procedures Center, Strategic Laboratory                                               |  |  |                                                                                                                                                                                                                                                                                                                                                                                                                              |
| EPI_ISL_940628                 | Unidade Mista de Guape                                                                                                                                                                          |                                                       | Virginia DCLS                                                                                                                  |  |  | Claudio Tavares Saechi, Claudia Regina Gonçalves, Erica Valessa Ramos Gomes, Karoline Rodrigues Campos                                                                                                                                                                                                                                                                                                                       |
| EPI_ISL_940840                 | Virginia DCLS                                                                                                                                                                                   |                                                       | Instituto Nacional de Saude (INSA)                                                                                             |  |  | Virginia DCLS                                                                                                                                                                                                                                                                                                                                                                                                                |
| EPI_ISL_941471, EPI_ISL_941492 | Instituto Nacional de Saude (INSA)                                                                                                                                                              |                                                       | Instituto Nacional de Saude (INSA) and Instituto Gulbenkian de Ciencia (IGC)                                                   |  |  | Borges et al                                                                                                                                                                                                                                                                                                                                                                                                                 |
| EPI_ISL_941827                 | Instituto Nacional de Saude (INSA) and Instituto Gulbenkian de Ciencia (IGC)                                                                                                                    |                                                       | University Hospital Basel, Clinical Bacteriology                                                                               |  |  | Borges et al                                                                                                                                                                                                                                                                                                                                                                                                                 |
| EPI_ISL_942376                 | Vollter AG                                                                                                                                                                                      |                                                       | Virginia DCLS                                                                                                                  |  |  |                                                                                                                                                                                                                                                                                                                                                                                                                              |
| EPI_ISL_942395                 | Virginia DCLS                                                                                                                                                                                   |                                                       | University Hospital Basel, Clinical Bacteriology                                                                               |  |  |                                                                                                                                                                                                                                                                                                                                                                                                                              |
| EPI_ISL_942406                 | Vollter AG                                                                                                                                                                                      |                                                       | National Institute for Public Health and the Environment (RIVA)                                                                |  |  | Tim Hoelt, Madlen Stange, Helena MB Seif-Smith, Alfredo Mari, Karoline Leuzinger, Julia Bleickl, Christiane Beckmann, Manuel Bategay, Hans Hirsch, Virginia DCLS                                                                                                                                                                                                                                                             |
| EPI_ISL_943102, EPI_ISL_943448 | Dutch COVID-19 response team                                                                                                                                                                    |                                                       | State Center for Health Surveillance, Rio Grande do Sul State Secretary of Health                                              |  |  | Adam Meijer, Harry Vennema, Dirk Eggink, Jeroen Cremer, Sharon van den Bink, Bas van der Veer, AnneMarie van den Brandt, Florian Zwagemaker, Dennis Schmitz, Charalé Reusken, on behalf of the national COVID-19 response team                                                                                                                                                                                               |
| EPI_ISL_943498, EPI_ISL_943499 | Lacem_RS                                                                                                                                                                                        |                                                       | Instituto Adolfo Lutz, Interdisciplinary Procedures Center, Strategic Laboratory                                               |  |  | Aline Campos, Amanda da Silva, Anelise Schaurich, Claudia Domelles, Cynthia Molina, Fernando Godinho, Lara Crescanto, Letícia Garay, Regina Barcelos, Richard Sarvaio, Tatiana Greggianni, Vagner Fonseca                                                                                                                                                                                                                    |
| EPI_ISL_943610                 | LACEN do Estado de Tocantins                                                                                                                                                                    |                                                       | Instituto Adolfo Lutz, Interdisciplinary Procedures Center, Strategic Laboratory                                               |  |  | Claudio Tavares Saechi, Claudia Regina Gonçalves, Erica Valessa Ramos Gomes, Karoline Rodrigues Campos                                                                                                                                                                                                                                                                                                                       |
| EPI_ISL_943986                 | LACEN do Estado de Goiás                                                                                                                                                                        |                                                       | Institute for Medical Research, Infectious Disease Research Centre, National Institutes of Health, Ministry of Health Malaysia |  |  | Claudio Tavares Saechi, Claudia Regina Gonçalves, Erica Valessa Ramos Gomes, Karoline Rodrigues Campos                                                                                                                                                                                                                                                                                                                       |
| EPI_ISL_943989                 |                                                                                                                                                                                                 |                                                       | Wellcome Sanger Institute for the COVID-19 Genomics UK (COG-UK) Consortium                                                     |  |  | Suppliah J, Kamel K, Azzam MA, Thayer R                                                                                                                                                                                                                                                                                                                                                                                      |
| EPI_ISL_944096                 | Institute for Medical Research, Infectious Disease Research Centre, National Institutes of Health, Ministry of Health Malaysia                                                                  |                                                       | COVID-19 Genomics UK (COG-UK) Consortium                                                                                       |  |  |                                                                                                                                                                                                                                                                                                                                                                                                                              |
| EPI_ISL_946900                 | Lighthouse Lab in Abertley Park                                                                                                                                                                 |                                                       | COVID-19 Genomics UK (COG-UK) Consortium                                                                                       |  |  |                                                                                                                                                                                                                                                                                                                                                                                                                              |
| EPI_ISL_949646                 | Virology Department, Royal Infirmary of Edinburgh, NHS Lothian / School of Biological Sciences, University of Edinburgh / Institute of Genetics and Molecular Medicine, University of Edinburgh |                                                       | COVID-19 Genomics UK (COG-UK) Consortium                                                                                       |  |  |                                                                                                                                                                                                                                                                                                                                                                                                                              |
| EPI_ISL_951071                 | Okord Vironics, NDM, University of Oxford, Oxford University Hospitals, Beasingstone and North Hampshire Hospital                                                                               |                                                       | COVID-19 Genomics UK (COG-UK) Consortium                                                                                       |  |  |                                                                                                                                                                                                                                                                                                                                                                                                                              |
| EPI_ISL_952611, EPI_ISL_952645 | Centre for Enzyme Innovation, University of Portsmouth / Translational Research Laboratory, Portsmouth Hospitals NHS Trust                                                                      |                                                       | National Reference Center for Viruses of Respiratory Infections, Institut Pasteur, Paris                                       |  |  | Tanya Goldzhtik, David Bornsall, George Mochlyve, Amy Trebes, Mariateresa de Cesare, Cathrì Moore, Alex Mobbs, Ania Justice, Robert Shaw, Monique Andersson, Timothy Peio, Emma Wise, Nathan Moore, Jessica Lynch, Nick Cortes, Matilde Mott, Stephen Kidd, David Buck, John Todd, Christophe Fraser                                                                                                                         |
| EPI_ISL_954058                 | Ourte Wer                                                                                                                                                                                       |                                                       | National Reference Center for Viruses of Respiratory Infections, Institut Pasteur, Paris                                       |  |  | Angela Beckett, Salman Goudarzi, Christopher Fern, Kate Cook, Katie Lovesson, Sharon Glysters, Scott Elliott, Samuel Robson                                                                                                                                                                                                                                                                                                  |
| EPI_ISL_954070                 | Labo Analyses Med                                                                                                                                                                               |                                                       | National Reference Center for Viruses of Respiratory Infections, Institut Pasteur, Paris                                       |  |  | Marion Barbet, Sylvie Behilli, Méline Bizard, Angela Bribesbarre, Camille Capel, Etienne Simon-Lorière, Vincent Enout, Maud Vanpeeine, Sylvie van der Werf, Rousset Dominique                                                                                                                                                                                                                                                |
| EPI_ISL_954074, EPI_ISL_954075 | Ourte Wer                                                                                                                                                                                       |                                                       | National Reference Center for Viruses of Respiratory Infections, Institut Pasteur, Paris                                       |  |  | Marion Barbet, Sylvie Behilli, Méline Bizard, Angela Bribesbarre, Camille Capel, Etienne Simon-Lorière, Vincent Enout, Maud Vanpeeine, Sylvie van der Werf, Rousset Dominique                                                                                                                                                                                                                                                |
| EPI_ISL_954086, EPI_ISL_954089 | Lighthouse Lab in Milton Keynes                                                                                                                                                                 |                                                       | National Reference Center for Viruses of Respiratory Infections, Institut Pasteur, Paris                                       |  |  | Marion Barbet, Sylvie Behilli, Méline Bizard, Angela Bribesbarre, Camille Capel, Etienne Simon-Lorière, Vincent Enout, Maud Vanpeeine, Sylvie van der Werf, Rousset Dominique                                                                                                                                                                                                                                                |
| EPI_ISL_954109                 | Virginia Division of Consolidated Laboratory Services                                                                                                                                           |                                                       | National Reference Center for Viruses of Respiratory Infections, Institut Pasteur, Paris                                       |  |  | Marion Barbet, Sylvie Behilli, Méline Bizard, Angela Bribesbarre, Camille Capel, Etienne Simon-Lorière, Vincent Enout, Maud Vanpeeine, Sylvie van der Werf, Rousset Dominique                                                                                                                                                                                                                                                |
| EPI_ISL_960212                 | Germano de souza                                                                                                                                                                                |                                                       | Wellcome Sanger Institute for the COVID-19 Genomics UK (COG-UK) Consortium                                                     |  |  | The Lighthouse Lab in Milton Keynes and Alex Alderton, Roberto Amato, Sonia Goncalves, Ewan Harrison, David K. Jackson, Ian Johnston, Dominic Kwiatkowski, Cordelia Langford, John Sillitoe on behalf of the Wellcome Sanger Institute COVID-19 Surveillance 1 team                                                                                                                                                          |
| EPI_ISL_960728                 | Germano de souza                                                                                                                                                                                |                                                       | Instituto Gulbenkian de Ciencia                                                                                                |  |  | Virginia DCLS                                                                                                                                                                                                                                                                                                                                                                                                                |
| EPI_ISL_960829                 | Germano de souza                                                                                                                                                                                |                                                       | Instituto Gulbenkian de Ciencia                                                                                                |  |  | Cathy Paulino, João Costa, João Sobral, Maria Costa, Susana Ladeira, Ricardo Leite                                                                                                                                                                                                                                                                                                                                           |
| EPI_ISL_962392, EPI_ISL_962370 | Hospital Universitario de Gran Canaria Dr. Negrín                                                                                                                                               |                                                       | SeqCOVID-SPAIN consortium(MBV/CISIC)                                                                                           |  |  | M. Carmen Perez González, Francisco J. Chamizo Lopez, Ana Bordas Benítez and SeqCOVID-SPAIN consortium                                                                                                                                                                                                                                                                                                                       |
| EPI_ISL_962611                 | Public Health Ontario Laboratory                                                                                                                                                                |                                                       | Public Health Ontario Laboratory                                                                                               |  |  | Vanessa G. Allen, Phillip Bann, Yao Chen, Richard de Boer, Aliceza Esquivel, Nabunel Fitriadi, Christine Frantz, Jonathan B Gubbay, Jennifer L Guthrie, Lawrence Heister, Esna Joshi, Michael Laszloffy, Aimin Li, Michael CY Li, Dean Maxwell, Sandeep Nagra, Santir N Patel, Jared Simpson, Karthikeyan Sivaraman, Ashleigh Sullivan, Yogi Sundararavadanam, Sarah Treater, Andre Villegas, Matthew Watson, Sandra Ziltman |
| EPI_ISL_966698                 | Helix/Illumina                                                                                                                                                                                  |                                                       | Respiratory Viruses Branch, Division of Viral Diseases, Centers for Disease Control and Prevention                             |  |  | Peter W. Cook, Dakota Howard, Divvanti Barira Ben L, Rambo-Martin,Eileen de Fao,Jan Antico,Christine Tran,Matthew Telantio,Shannon Wickline,Kim Glatzen,Brad Sticker,Jingtao Liu,Eric Allen,Phill Felbo,Sumner Galloway,Nicole L. Washington,Simon White,Gerard Levan,Kelly Schabot                                                                                                                                          |
| EPI_ISL_966980                 | Maïne HETL                                                                                                                                                                                      |                                                       | Respiratory Viruses Branch, Division of Viral Diseases, Centers for Disease Control and Prevention                             |  |  | Barratt,Elizabeth Cirulli,Alexandre Boize Ary Ascencio,Charlotte Flavera-Garcia,Ryan Cho,Jason Nguyen,Sherry Wang,Jimmy Ramirez,Tyler Cassens,Eren Sandoval,Magnus Isaksson,William Lee,David Becker, Marc Laurent,James Lu,Cifton R. Pader,Suixiang Tong,Duncan MacCannell,                                                                                                                                                 |
| EPI_ISL_967223                 | Helix/Illumina                                                                                                                                                                                  |                                                       | Respiratory Viruses Branch, Division of Viral Diseases, Centers for Disease Control and Prevention                             |  |  | Malik N., Dewey H., Iosiae F., Barber M., Lynch R., Mungier H. and Tenney R.                                                                                                                                                                                                                                                                                                                                                 |
| EPI_ISL_967234                 | Helix/Illumina                                                                                                                                                                                  |                                                       | Respiratory Viruses Branch, Division of Viral Diseases, Centers for Disease Control and Prevention                             |  |  | Peter W. Cook,Dakota Howard,Divvanti Barira Ben L, Rambo-Martin,Eileen de Fao,Jan Antico,Christine Tran,Matthew Telantio,Shannon Wickline,Kim Glatzen,Brad Sticker,Jingtao Liu,Eric Allen,Phill Felbo,Sumner Galloway,Nicole L. Washington,Simon White,Gerard Levan,Kelly Schabot                                                                                                                                            |

EPI\_ISL\_976423, EPI\_ISL\_976424,  
EPI\_ISL\_976426, EPI\_ISL\_976501,  
EPI\_ISL\_976973  
EPI\_ISL\_977489

BCCDC Public Health Laboratory

UPA Dr. Aktra Tada

BCCDC Public Health Laboratory

Instituto Adolfo Lutz, Interdisciplinary Procedures Center,  
Strategic Laboratory

Barrett Elizabeth, Cirulli Alexandre, Bojza Aiy, Ascencio, Charlotte, Rivera, Garcia, Ryan, Cho, Jason, Nguyen, Sherry, Wang, Jimmy, Ramirez, Tyler, Cassens, Elean  
Sandoval, Magnus, Isaksson, William, Lee, David, Becker, Marc, Laurent, James, Lu, Clinton R., Paden, Suixiang, Tong, Duncan, MacCannell,  
Fryslajeky, Natalie, Linda Hoang, Dan Fornika, John Tyson, Shannon Russell, Kim Macdonald, Kiria Kamelian, Ana Pacagnella, Corinne Ng, Loreta  
Janz, Robert, Azana Terry, Struch, Mel Krajden

Claudio Tavares Saechi, Claudia Regina Gonçalves, Erica Valessa Ramos Gomes, Karoline Rodrigues Campos
